# Supplementary material for: Moral Judgements on the Actions of Self-Driving Cars and Human Drivers in Dilemma Situations From Different Perspectives
Source: Front Psychol. 2019 Nov 1;10:2415. doi: 10.3389/fpsyg.2019.02415 (PMC6844247; doi:10.3389/fpsyg.2019.02415)
Supplement: Data Sheet 2 — Study 2 data. [file Data_Sheet_2.CSV]

participant	gender	knowledge_of_self_driving_cars	identification	driving_experience	age_group	positive_opinion_of_self_driving_cars	perspective	motorist	road_type	judgement	first_anim	scenario	lives_at_risk
3802	male	yes	pedestrian	more than 10 years	30-39	5	pedestrian_side	self-driving	road	swerve	stay	pedestrians_vs_single_pedestrian	2v1
3802	male	yes	pedestrian	more than 10 years	30-39	5	pedestrian_side	self-driving	road	swerve	stay	pedestrians_vs_single_pedestrian	4v1
3802	male	yes	pedestrian	more than 10 years	30-39	5	pedestrian_side	self-driving	sidewalk	swerve	swerve	pedestrians_vs_single_pedestrian	2v1
3802	male	yes	pedestrian	more than 10 years	30-39	5	pedestrian_side	self-driving	road	swerve	swerve	pedestrians_vs_single_pedestrian	3v1
3802	male	yes	pedestrian	more than 10 years	30-39	5	pedestrian_side	self-driving	sidewalk	swerve	swerve	pedestrians_vs_single_pedestrian	3v1
3802	male	yes	pedestrian	more than 10 years	30-39	5	pedestrian_side	self-driving	road	swerve	stay	pedestrians_vs_single_pedestrian	1v1
3802	male	yes	pedestrian	more than 10 years	30-39	5	pedestrian_side	self-driving	sidewalk	swerve	swerve	pedestrians_vs_single_pedestrian	1v1
3802	male	yes	pedestrian	more than 10 years	30-39	5	pedestrian_side	self-driving	sidewalk	swerve	stay	pedestrians_vs_single_pedestrian	4v1
3803	male	yes	pedestrian	less than 5 years	18-29	5	pedestrian_side	self-driving	road	swerve	swerve	pedestrians_vs_single_pedestrian	2v1
3803	male	yes	pedestrian	less than 5 years	18-29	5	pedestrian_side	self-driving	sidewalk	swerve	swerve	pedestrians_vs_single_pedestrian	4v1
3803	male	yes	pedestrian	less than 5 years	18-29	5	pedestrian_side	self-driving	sidewalk	swerve	stay	pedestrians_vs_single_pedestrian	2v1
3803	male	yes	pedestrian	less than 5 years	18-29	5	pedestrian_side	self-driving	road	swerve	stay	pedestrians_vs_single_pedestrian	4v1
3803	male	yes	pedestrian	less than 5 years	18-29	5	pedestrian_side	self-driving	road	swerve	swerve	pedestrians_vs_single_pedestrian	3v1
3803	male	yes	pedestrian	less than 5 years	18-29	5	pedestrian_side	self-driving	sidewalk	swerve	stay	pedestrians_vs_single_pedestrian	1v1
3803	male	yes	pedestrian	less than 5 years	18-29	5	pedestrian_side	self-driving	sidewalk	swerve	swerve	pedestrians_vs_single_pedestrian	3v1
3803	male	yes	pedestrian	less than 5 years	18-29	5	pedestrian_side	self-driving	road	swerve	stay	pedestrians_vs_single_pedestrian	1v1
3804	male	yes	car_occupant	NA	NA	5	car_occupant	human	road	stay	stay	pedestrians_vs_single_pedestrian	1v1
3804	male	yes	car_occupant	NA	NA	5	car_occupant	human	sidewalk	stay	swerve	pedestrians_vs_single_pedestrian	1v1
3804	male	yes	car_occupant	NA	NA	5	car_occupant	human	road	swerve	swerve	pedestrians_vs_single_pedestrian	4v1
3804	male	yes	car_occupant	NA	NA	5	car_occupant	human	sidewalk	stay	stay	pedestrians_vs_single_pedestrian	3v1
3804	male	yes	car_occupant	NA	NA	5	car_occupant	human	sidewalk	stay	swerve	pedestrians_vs_single_pedestrian	4v1
3804	male	yes	car_occupant	NA	NA	5	car_occupant	human	road	swerve	stay	pedestrians_vs_single_pedestrian	3v1
3804	male	yes	car_occupant	NA	NA	5	car_occupant	human	sidewalk	stay	stay	pedestrians_vs_single_pedestrian	2v1
3804	male	yes	car_occupant	NA	NA	5	car_occupant	human	road	swerve	swerve	pedestrians_vs_single_pedestrian	2v1
3817	female	yes	pedestrian	6 to 10 years	18-29	2	observer	self-driving	sidewalk	swerve	swerve	pedestrians_vs_single_pedestrian	3v1
3817	female	yes	pedestrian	6 to 10 years	18-29	2	observer	self-driving	sidewalk	stay	swerve	pedestrians_vs_single_pedestrian	1v1
3817	female	yes	pedestrian	6 to 10 years	18-29	2	observer	self-driving	road	stay	stay	pedestrians_vs_single_pedestrian	1v1
3817	female	yes	pedestrian	6 to 10 years	18-29	2	observer	self-driving	road	swerve	swerve	pedestrians_vs_single_pedestrian	3v1
3817	female	yes	pedestrian	6 to 10 years	18-29	2	observer	self-driving	road	swerve	stay	pedestrians_vs_single_pedestrian	2v1
3817	female	yes	pedestrian	6 to 10 years	18-29	2	observer	self-driving	road	stay	stay	pedestrians_vs_single_pedestrian	4v1
3817	female	yes	pedestrian	6 to 10 years	18-29	2	observer	self-driving	sidewalk	swerve	stay	pedestrians_vs_single_pedestrian	2v1
3817	female	yes	pedestrian	6 to 10 years	18-29	2	observer	self-driving	sidewalk	swerve	swerve	pedestrians_vs_single_pedestrian	4v1
3819	female	yes	pedestrian	none	18-29	2	observer	self-driving	road	swerve	stay	pedestrians_vs_single_pedestrian	3v1
3819	female	yes	pedestrian	none	18-29	2	observer	self-driving	road	stay	stay	pedestrians_vs_single_pedestrian	1v1
3819	female	yes	pedestrian	none	18-29	2	observer	self-driving	sidewalk	stay	swerve	pedestrians_vs_single_pedestrian	1v1
3819	female	yes	pedestrian	none	18-29	2	observer	self-driving	road	swerve	swerve	pedestrians_vs_single_pedestrian	4v1
3819	female	yes	pedestrian	none	18-29	2	observer	self-driving	sidewalk	swerve	swerve	pedestrians_vs_single_pedestrian	2v1
3819	female	yes	pedestrian	none	18-29	2	observer	self-driving	road	swerve	stay	pedestrians_vs_single_pedestrian	2v1
3819	female	yes	pedestrian	none	18-29	2	observer	self-driving	sidewalk	swerve	stay	pedestrians_vs_single_pedestrian	3v1
3819	female	yes	pedestrian	none	18-29	2	observer	self-driving	sidewalk	swerve	stay	pedestrians_vs_single_pedestrian	4v1
3827	male	yes	car_occupant	NA	NA	5	pedestrian_side	human	sidewalk	swerve	stay	pedestrians_vs_single_pedestrian	4v1
3827	male	yes	car_occupant	NA	NA	5	pedestrian_side	human	road	swerve	stay	pedestrians_vs_single_pedestrian	2v1
3827	male	yes	car_occupant	NA	NA	5	pedestrian_side	human	sidewalk	swerve	swerve	pedestrians_vs_single_pedestrian	2v1
3827	male	yes	car_occupant	NA	NA	5	pedestrian_side	human	road	stay	stay	pedestrians_vs_single_pedestrian	1v1
3827	male	yes	car_occupant	NA	NA	5	pedestrian_side	human	road	swerve	stay	pedestrians_vs_single_pedestrian	4v1
3827	male	yes	car_occupant	NA	NA	5	pedestrian_side	human	sidewalk	stay	swerve	pedestrians_vs_single_pedestrian	1v1
3827	male	yes	car_occupant	NA	NA	5	pedestrian_side	human	sidewalk	swerve	swerve	pedestrians_vs_single_pedestrian	3v1
3827	male	yes	car_occupant	NA	NA	5	pedestrian_side	human	road	swerve	swerve	pedestrians_vs_single_pedestrian	3v1
3830	female	yes	car_occupant	6 to 10 years	18-29	2	pedestrian_front	self-driving	sidewalk	swerve	stay	pedestrians_vs_single_pedestrian	3v1
3830	female	yes	car_occupant	6 to 10 years	18-29	2	pedestrian_front	self-driving	sidewalk	swerve	swerve	pedestrians_vs_single_pedestrian	4v1
3830	female	yes	car_occupant	6 to 10 years	18-29	2	pedestrian_front	self-driving	sidewalk	swerve	stay	pedestrians_vs_single_pedestrian	2v1
3830	female	yes	car_occupant	6 to 10 years	18-29	2	pedestrian_front	self-driving	road	swerve	swerve	pedestrians_vs_single_pedestrian	3v1
3830	female	yes	car_occupant	6 to 10 years	18-29	2	pedestrian_front	self-driving	road	stay	swerve	pedestrians_vs_single_pedestrian	1v1
3830	female	yes	car_occupant	6 to 10 years	18-29	2	pedestrian_front	self-driving	road	swerve	swerve	pedestrians_vs_single_pedestrian	4v1
3830	female	yes	car_occupant	6 to 10 years	18-29	2	pedestrian_front	self-driving	road	swerve	stay	pedestrians_vs_single_pedestrian	2v1
3830	female	yes	car_occupant	6 to 10 years	18-29	2	pedestrian_front	self-driving	sidewalk	stay	stay	pedestrians_vs_single_pedestrian	1v1
3832	male	yes	car_occupant	NA	NA	2	observer	human	road	swerve	stay	pedestrians_vs_single_pedestrian	4v1
3832	male	yes	car_occupant	NA	NA	2	observer	human	road	swerve	swerve	pedestrians_vs_single_pedestrian	2v1
3832	male	yes	car_occupant	NA	NA	2	observer	human	sidewalk	stay	swerve	pedestrians_vs_single_pedestrian	1v1
3832	male	yes	car_occupant	NA	NA	2	observer	human	road	stay	stay	pedestrians_vs_single_pedestrian	1v1
3832	male	yes	car_occupant	NA	NA	2	observer	human	sidewalk	swerve	stay	pedestrians_vs_single_pedestrian	3v1
3832	male	yes	car_occupant	NA	NA	2	observer	human	sidewalk	swerve	stay	pedestrians_vs_single_pedestrian	2v1
3832	male	yes	car_occupant	NA	NA	2	observer	human	road	swerve	swerve	pedestrians_vs_single_pedestrian	3v1
3832	male	yes	car_occupant	NA	NA	2	observer	human	sidewalk	swerve	swerve	pedestrians_vs_single_pedestrian	4v1
3845	male	yes	car_occupant	6 to 10 years	18-29	2	car_occupant	self-driving	sidewalk	swerve	swerve	pedestrians_vs_single_pedestrian	3v1
3845	male	yes	car_occupant	6 to 10 years	18-29	2	car_occupant	self-driving	road	swerve	stay	pedestrians_vs_single_pedestrian	3v1
3845	male	yes	car_occupant	6 to 10 years	18-29	2	car_occupant	self-driving	road	stay	stay	pedestrians_vs_single_pedestrian	1v1
3845	male	yes	car_occupant	6 to 10 years	18-29	2	car_occupant	self-driving	road	swerve	swerve	pedestrians_vs_single_pedestrian	4v1
3845	male	yes	car_occupant	6 to 10 years	18-29	2	car_occupant	self-driving	sidewalk	swerve	stay	pedestrians_vs_single_pedestrian	4v1
3845	male	yes	car_occupant	6 to 10 years	18-29	2	car_occupant	self-driving	sidewalk	swerve	swerve	pedestrians_vs_single_pedestrian	2v1
3845	male	yes	car_occupant	6 to 10 years	18-29	2	car_occupant	self-driving	sidewalk	stay	stay	pedestrians_vs_single_pedestrian	1v1
3845	male	yes	car_occupant	6 to 10 years	18-29	2	car_occupant	self-driving	road	swerve	swerve	pedestrians_vs_single_pedestrian	2v1
3871	female	yes	car_occupant	NA	NA	4	observer	human	road	swerve	swerve	pedestrians_vs_single_pedestrian	3v1
3871	female	yes	car_occupant	NA	NA	4	observer	human	road	stay	stay	pedestrians_vs_single_pedestrian	1v1
3871	female	yes	car_occupant	NA	NA	4	observer	human	sidewalk	stay	swerve	pedestrians_vs_single_pedestrian	3v1
3871	female	yes	car_occupant	NA	NA	4	observer	human	sidewalk	stay	stay	pedestrians_vs_single_pedestrian	4v1
3871	female	yes	car_occupant	NA	NA	4	observer	human	road	swerve	swerve	pedestrians_vs_single_pedestrian	4v1
3871	female	yes	car_occupant	NA	NA	4	observer	human	sidewalk	stay	swerve	pedestrians_vs_single_pedestrian	2v1
3871	female	yes	car_occupant	NA	NA	4	observer	human	road	swerve	stay	pedestrians_vs_single_pedestrian	2v1
3871	female	yes	car_occupant	NA	NA	4	observer	human	sidewalk	stay	swerve	pedestrians_vs_single_pedestrian	1v1
3877	male	yes	pedestrian	NA	NA	5	car_occupant	human	sidewalk	stay	swerve	pedestrians_vs_single_pedestrian	2v1
3877	male	yes	pedestrian	NA	NA	5	car_occupant	human	road	swerve	swerve	pedestrians_vs_single_pedestrian	4v1
3877	male	yes	pedestrian	NA	NA	5	car_occupant	human	road	swerve	stay	pedestrians_vs_single_pedestrian	1v1
3877	male	yes	pedestrian	NA	NA	5	car_occupant	human	road	swerve	stay	pedestrians_vs_single_pedestrian	3v1
3877	male	yes	pedestrian	NA	NA	5	car_occupant	human	sidewalk	swerve	swerve	pedestrians_vs_single_pedestrian	4v1
3877	male	yes	pedestrian	NA	NA	5	car_occupant	human	sidewalk	swerve	swerve	pedestrians_vs_single_pedestrian	1v1
3877	male	yes	pedestrian	NA	NA	5	car_occupant	human	road	stay	stay	pedestrians_vs_single_pedestrian	2v1
3877	male	yes	pedestrian	NA	NA	5	car_occupant	human	sidewalk	swerve	stay	pedestrians_vs_single_pedestrian	3v1
3881	female	yes	car_occupant	NA	NA	4	pedestrian_front	human	road	stay	swerve	pedestrians_vs_single_pedestrian	1v1
3881	female	yes	car_occupant	NA	NA	4	pedestrian_front	human	road	swerve	stay	pedestrians_vs_single_pedestrian	3v1
3881	female	yes	car_occupant	NA	NA	4	pedestrian_front	human	sidewalk	swerve	stay	pedestrians_vs_single_pedestrian	3v1
3881	female	yes	car_occupant	NA	NA	4	pedestrian_front	human	sidewalk	swerve	swerve	pedestrians_vs_single_pedestrian	1v1
3881	female	yes	car_occupant	NA	NA	4	pedestrian_front	human	road	swerve	stay	pedestrians_vs_single_pedestrian	2v1
3881	female	yes	car_occupant	NA	NA	4	pedestrian_front	human	sidewalk	swerve	stay	pedestrians_vs_single_pedestrian	4v1
3881	female	yes	car_occupant	NA	NA	4	pedestrian_front	human	road	swerve	stay	pedestrians_vs_single_pedestrian	4v1
3881	female	yes	car_occupant	NA	NA	4	pedestrian_front	human	sidewalk	swerve	swerve	pedestrians_vs_single_pedestrian	2v1
3905	male	yes	pedestrian	6 to 10 years	18-29	5	pedestrian_front	self-driving	sidewalk	swerve	stay	pedestrians_vs_single_pedestrian	1v1
3905	male	yes	pedestrian	6 to 10 years	18-29	5	pedestrian_front	self-driving	sidewalk	swerve	swerve	pedestrians_vs_single_pedestrian	2v1
3905	male	yes	pedestrian	6 to 10 years	18-29	5	pedestrian_front	self-driving	sidewalk	swerve	stay	pedestrians_vs_single_pedestrian	4v1
3905	male	yes	pedestrian	6 to 10 years	18-29	5	pedestrian_front	self-driving	sidewalk	swerve	swerve	pedestrians_vs_single_pedestrian	3v1
3905	male	yes	pedestrian	6 to 10 years	18-29	5	pedestrian_front	self-driving	road	swerve	swerve	pedestrians_vs_single_pedestrian	2v1
3905	male	yes	pedestrian	6 to 10 years	18-29	5	pedestrian_front	self-driving	road	swerve	stay	pedestrians_vs_single_pedestrian	1v1
3905	male	yes	pedestrian	6 to 10 years	18-29	5	pedestrian_front	self-driving	road	swerve	swerve	pedestrians_vs_single_pedestrian	4v1
3905	male	yes	pedestrian	6 to 10 years	18-29	5	pedestrian_front	self-driving	road	swerve	stay	pedestrians_vs_single_pedestrian	3v1
3912	female	yes	pedestrian	none	30-39	4	car_occupant	self-driving	sidewalk	stay	stay	pedestrians_vs_single_pedestrian	1v1
3912	female	yes	pedestrian	none	30-39	4	car_occupant	self-driving	road	swerve	stay	pedestrians_vs_single_pedestrian	3v1
3912	female	yes	pedestrian	none	30-39	4	car_occupant	self-driving	road	swerve	stay	pedestrians_vs_single_pedestrian	4v1
3912	female	yes	pedestrian	none	30-39	4	car_occupant	self-driving	sidewalk	swerve	swerve	pedestrians_vs_single_pedestrian	3v1
3912	female	yes	pedestrian	none	30-39	4	car_occupant	self-driving	road	swerve	swerve	pedestrians_vs_single_pedestrian	2v1
3912	female	yes	pedestrian	none	30-39	4	car_occupant	self-driving	sidewalk	swerve	stay	pedestrians_vs_single_pedestrian	4v1
3912	female	yes	pedestrian	none	30-39	4	car_occupant	self-driving	sidewalk	swerve	swerve	pedestrians_vs_single_pedestrian	2v1
3912	female	yes	pedestrian	none	30-39	4	car_occupant	self-driving	road	swerve	swerve	pedestrians_vs_single_pedestrian	1v1
3917	female	yes	pedestrian	NA	NA	2	pedestrian_side	human	road	swerve	swerve	pedestrians_vs_single_pedestrian	3v1
3917	female	yes	pedestrian	NA	NA	2	pedestrian_side	human	sidewalk	swerve	stay	pedestrians_vs_single_pedestrian	4v1
3917	female	yes	pedestrian	NA	NA	2	pedestrian_side	human	sidewalk	swerve	stay	pedestrians_vs_single_pedestrian	3v1
3917	female	yes	pedestrian	NA	NA	2	pedestrian_side	human	sidewalk	swerve	swerve	pedestrians_vs_single_pedestrian	1v1
3917	female	yes	pedestrian	NA	NA	2	pedestrian_side	human	sidewalk	swerve	swerve	pedestrians_vs_single_pedestrian	2v1
3917	female	yes	pedestrian	NA	NA	2	pedestrian_side	human	road	swerve	swerve	pedestrians_vs_single_pedestrian	2v1
3917	female	yes	pedestrian	NA	NA	2	pedestrian_side	human	road	swerve	stay	pedestrians_vs_single_pedestrian	4v1
3917	female	yes	pedestrian	NA	NA	2	pedestrian_side	human	road	swerve	stay	pedestrians_vs_single_pedestrian	1v1
3947	male	yes	pedestrian	more than 10 years	18-29	5	pedestrian_front	self-driving	sidewalk	swerve	stay	pedestrians_vs_single_pedestrian	3v1
3947	male	yes	pedestrian	more than 10 years	18-29	5	pedestrian_front	self-driving	road	stay	swerve	pedestrians_vs_single_pedestrian	1v1
3947	male	yes	pedestrian	more than 10 years	18-29	5	pedestrian_front	self-driving	road	swerve	stay	pedestrians_vs_single_pedestrian	3v1
3947	male	yes	pedestrian	more than 10 years	18-29	5	pedestrian_front	self-driving	sidewalk	swerve	swerve	pedestrians_vs_single_pedestrian	4v1
3947	male	yes	pedestrian	more than 10 years	18-29	5	pedestrian_front	self-driving	sidewalk	swerve	stay	pedestrians_vs_single_pedestrian	2v1
3947	male	yes	pedestrian	more than 10 years	18-29	5	pedestrian_front	self-driving	road	swerve	stay	pedestrians_vs_single_pedestrian	2v1
3947	male	yes	pedestrian	more than 10 years	18-29	5	pedestrian_front	self-driving	sidewalk	stay	swerve	pedestrians_vs_single_pedestrian	1v1
3947	male	yes	pedestrian	more than 10 years	18-29	5	pedestrian_front	self-driving	road	swerve	swerve	pedestrians_vs_single_pedestrian	4v1
3950	female	no	pedestrian	NA	NA	2	observer	human	sidewalk	swerve	stay	pedestrians_vs_single_pedestrian	2v1
3950	female	no	pedestrian	NA	NA	2	observer	human	road	swerve	swerve	pedestrians_vs_single_pedestrian	2v1
3950	female	no	pedestrian	NA	NA	2	observer	human	road	swerve	swerve	pedestrians_vs_single_pedestrian	4v1
3950	female	no	pedestrian	NA	NA	2	observer	human	road	swerve	swerve	pedestrians_vs_single_pedestrian	3v1
3950	female	no	pedestrian	NA	NA	2	observer	human	road	stay	stay	pedestrians_vs_single_pedestrian	1v1
3950	female	no	pedestrian	NA	NA	2	observer	human	sidewalk	swerve	stay	pedestrians_vs_single_pedestrian	4v1
3950	female	no	pedestrian	NA	NA	2	observer	human	sidewalk	swerve	stay	pedestrians_vs_single_pedestrian	1v1
3950	female	no	pedestrian	NA	NA	2	observer	human	sidewalk	swerve	stay	pedestrians_vs_single_pedestrian	3v1
3956	female	yes	car_occupant	NA	NA	2	observer	human	sidewalk	swerve	stay	pedestrians_vs_single_pedestrian	4v1
3956	female	yes	car_occupant	NA	NA	2	observer	human	sidewalk	stay	stay	pedestrians_vs_single_pedestrian	1v1
3956	female	yes	car_occupant	NA	NA	2	observer	human	road	swerve	swerve	pedestrians_vs_single_pedestrian	1v1
3956	female	yes	car_occupant	NA	NA	2	observer	human	sidewalk	swerve	stay	pedestrians_vs_single_pedestrian	3v1
3956	female	yes	car_occupant	NA	NA	2	observer	human	road	swerve	swerve	pedestrians_vs_single_pedestrian	2v1
3956	female	yes	car_occupant	NA	NA	2	observer	human	road	swerve	swerve	pedestrians_vs_single_pedestrian	4v1
3956	female	yes	car_occupant	NA	NA	2	observer	human	road	swerve	swerve	pedestrians_vs_single_pedestrian	3v1
3956	female	yes	car_occupant	NA	NA	2	observer	human	sidewalk	swerve	swerve	pedestrians_vs_single_pedestrian	2v1
3958	female	yes	pedestrian	NA	NA	5	pedestrian_front	human	road	stay	stay	pedestrians_vs_single_pedestrian	1v1
3958	female	yes	pedestrian	NA	NA	5	pedestrian_front	human	sidewalk	swerve	swerve	pedestrians_vs_single_pedestrian	2v1
3958	female	yes	pedestrian	NA	NA	5	pedestrian_front	human	sidewalk	swerve	stay	pedestrians_vs_single_pedestrian	3v1
3958	female	yes	pedestrian	NA	NA	5	pedestrian_front	human	road	swerve	stay	pedestrians_vs_single_pedestrian	2v1
3958	female	yes	pedestrian	NA	NA	5	pedestrian_front	human	road	swerve	stay	pedestrians_vs_single_pedestrian	4v1
3958	female	yes	pedestrian	NA	NA	5	pedestrian_front	human	road	swerve	swerve	pedestrians_vs_single_pedestrian	3v1
3958	female	yes	pedestrian	NA	NA	5	pedestrian_front	human	sidewalk	swerve	stay	pedestrians_vs_single_pedestrian	4v1
3958	female	yes	pedestrian	NA	NA	5	pedestrian_front	human	sidewalk	swerve	swerve	pedestrians_vs_single_pedestrian	1v1
3959	female	yes	car_occupant	NA	NA	4	car_occupant	human	road	swerve	stay	pedestrians_vs_single_pedestrian	2v1
3959	female	yes	car_occupant	NA	NA	4	car_occupant	human	sidewalk	swerve	stay	pedestrians_vs_single_pedestrian	3v1
3959	female	yes	car_occupant	NA	NA	4	car_occupant	human	road	swerve	swerve	pedestrians_vs_single_pedestrian	3v1
3959	female	yes	car_occupant	NA	NA	4	car_occupant	human	sidewalk	stay	stay	pedestrians_vs_single_pedestrian	1v1
3959	female	yes	car_occupant	NA	NA	4	car_occupant	human	road	stay	swerve	pedestrians_vs_single_pedestrian	1v1
3959	female	yes	car_occupant	NA	NA	4	car_occupant	human	road	swerve	swerve	pedestrians_vs_single_pedestrian	4v1
3959	female	yes	car_occupant	NA	NA	4	car_occupant	human	sidewalk	swerve	swerve	pedestrians_vs_single_pedestrian	4v1
3959	female	yes	car_occupant	NA	NA	4	car_occupant	human	sidewalk	swerve	stay	pedestrians_vs_single_pedestrian	2v1
3963	male	yes	car_occupant	more than 10 years	50-59	4	observer	self-driving	sidewalk	swerve	stay	pedestrians_vs_single_pedestrian	3v1
3963	male	yes	car_occupant	more than 10 years	50-59	4	observer	self-driving	road	swerve	stay	pedestrians_vs_single_pedestrian	3v1
3963	male	yes	car_occupant	more than 10 years	50-59	4	observer	self-driving	sidewalk	swerve	swerve	pedestrians_vs_single_pedestrian	4v1
3963	male	yes	car_occupant	more than 10 years	50-59	4	observer	self-driving	sidewalk	swerve	swerve	pedestrians_vs_single_pedestrian	2v1
3963	male	yes	car_occupant	more than 10 years	50-59	4	observer	self-driving	road	swerve	stay	pedestrians_vs_single_pedestrian	2v1
3963	male	yes	car_occupant	more than 10 years	50-59	4	observer	self-driving	road	stay	swerve	pedestrians_vs_single_pedestrian	1v1
3963	male	yes	car_occupant	more than 10 years	50-59	4	observer	self-driving	sidewalk	swerve	stay	pedestrians_vs_single_pedestrian	1v1
3963	male	yes	car_occupant	more than 10 years	50-59	4	observer	self-driving	road	swerve	swerve	pedestrians_vs_single_pedestrian	4v1
3966	female	yes	car_occupant	less than 5 years	18-29	2	car_occupant	self-driving	road	swerve	stay	pedestrians_vs_single_pedestrian	2v1
3966	female	yes	car_occupant	less than 5 years	18-29	2	car_occupant	self-driving	sidewalk	swerve	swerve	pedestrians_vs_single_pedestrian	3v1
3966	female	yes	car_occupant	less than 5 years	18-29	2	car_occupant	self-driving	sidewalk	swerve	stay	pedestrians_vs_single_pedestrian	4v1
3966	female	yes	car_occupant	less than 5 years	18-29	2	car_occupant	self-driving	road	swerve	stay	pedestrians_vs_single_pedestrian	1v1
3966	female	yes	car_occupant	less than 5 years	18-29	2	car_occupant	self-driving	road	swerve	swerve	pedestrians_vs_single_pedestrian	3v1
3966	female	yes	car_occupant	less than 5 years	18-29	2	car_occupant	self-driving	sidewalk	swerve	swerve	pedestrians_vs_single_pedestrian	1v1
3966	female	yes	car_occupant	less than 5 years	18-29	2	car_occupant	self-driving	road	swerve	swerve	pedestrians_vs_single_pedestrian	4v1
3966	female	yes	car_occupant	less than 5 years	18-29	2	car_occupant	self-driving	sidewalk	swerve	stay	pedestrians_vs_single_pedestrian	2v1
3970	female	yes	pedestrian	NA	NA	2	pedestrian_side	human	sidewalk	swerve	swerve	pedestrians_vs_single_pedestrian	2v1
3970	female	yes	pedestrian	NA	NA	2	pedestrian_side	human	road	swerve	swerve	pedestrians_vs_single_pedestrian	1v1
3970	female	yes	pedestrian	NA	NA	2	pedestrian_side	human	road	swerve	stay	pedestrians_vs_single_pedestrian	2v1
3970	female	yes	pedestrian	NA	NA	2	pedestrian_side	human	sidewalk	swerve	stay	pedestrians_vs_single_pedestrian	1v1
3970	female	yes	pedestrian	NA	NA	2	pedestrian_side	human	sidewalk	swerve	stay	pedestrians_vs_single_pedestrian	3v1
3970	female	yes	pedestrian	NA	NA	2	pedestrian_side	human	road	swerve	swerve	pedestrians_vs_single_pedestrian	4v1
3970	female	yes	pedestrian	NA	NA	2	pedestrian_side	human	road	swerve	swerve	pedestrians_vs_single_pedestrian	3v1
3970	female	yes	pedestrian	NA	NA	2	pedestrian_side	human	sidewalk	swerve	stay	pedestrians_vs_single_pedestrian	4v1
3974	female	yes	car_occupant	none	18-29	4	car_occupant	self-driving	road	swerve	stay	pedestrians_vs_single_pedestrian	3v1
3974	female	yes	car_occupant	none	18-29	4	car_occupant	self-driving	road	stay	swerve	pedestrians_vs_single_pedestrian	1v1
3974	female	yes	car_occupant	none	18-29	4	car_occupant	self-driving	road	swerve	swerve	pedestrians_vs_single_pedestrian	4v1
3974	female	yes	car_occupant	none	18-29	4	car_occupant	self-driving	sidewalk	stay	swerve	pedestrians_vs_single_pedestrian	2v1
3974	female	yes	car_occupant	none	18-29	4	car_occupant	self-driving	sidewalk	swerve	stay	pedestrians_vs_single_pedestrian	4v1
3974	female	yes	car_occupant	none	18-29	4	car_occupant	self-driving	road	swerve	stay	pedestrians_vs_single_pedestrian	2v1
3974	female	yes	car_occupant	none	18-29	4	car_occupant	self-driving	sidewalk	swerve	stay	pedestrians_vs_single_pedestrian	3v1
3974	female	yes	car_occupant	none	18-29	4	car_occupant	self-driving	sidewalk	stay	stay	pedestrians_vs_single_pedestrian	1v1
3982	male	no	pedestrian	NA	NA	5	pedestrian_front	human	road	swerve	stay	pedestrians_vs_single_pedestrian	3v1
3982	male	no	pedestrian	NA	NA	5	pedestrian_front	human	road	swerve	stay	pedestrians_vs_single_pedestrian	4v1
3982	male	no	pedestrian	NA	NA	5	pedestrian_front	human	sidewalk	swerve	swerve	pedestrians_vs_single_pedestrian	4v1
3982	male	no	pedestrian	NA	NA	5	pedestrian_front	human	sidewalk	swerve	swerve	pedestrians_vs_single_pedestrian	1v1
3982	male	no	pedestrian	NA	NA	5	pedestrian_front	human	road	swerve	swerve	pedestrians_vs_single_pedestrian	1v1
3982	male	no	pedestrian	NA	NA	5	pedestrian_front	human	sidewalk	swerve	stay	pedestrians_vs_single_pedestrian	2v1
3982	male	no	pedestrian	NA	NA	5	pedestrian_front	human	road	swerve	swerve	pedestrians_vs_single_pedestrian	2v1
3982	male	no	pedestrian	NA	NA	5	pedestrian_front	human	sidewalk	swerve	stay	pedestrians_vs_single_pedestrian	3v1
3983	female	yes	car_occupant	none	18-29	2	observer	self-driving	sidewalk	swerve	swerve	pedestrians_vs_single_pedestrian	4v1
3983	female	yes	car_occupant	none	18-29	2	observer	self-driving	road	swerve	stay	pedestrians_vs_single_pedestrian	4v1
3983	female	yes	car_occupant	none	18-29	2	observer	self-driving	sidewalk	swerve	stay	pedestrians_vs_single_pedestrian	1v1
3983	female	yes	car_occupant	none	18-29	2	observer	self-driving	sidewalk	swerve	swerve	pedestrians_vs_single_pedestrian	2v1
3983	female	yes	car_occupant	none	18-29	2	observer	self-driving	road	swerve	swerve	pedestrians_vs_single_pedestrian	1v1
3983	female	yes	car_occupant	none	18-29	2	observer	self-driving	sidewalk	swerve	swerve	pedestrians_vs_single_pedestrian	3v1
3983	female	yes	car_occupant	none	18-29	2	observer	self-driving	road	swerve	stay	pedestrians_vs_single_pedestrian	3v1
3983	female	yes	car_occupant	none	18-29	2	observer	self-driving	road	swerve	stay	pedestrians_vs_single_pedestrian	2v1
3986	female	yes	car_occupant	NA	NA	2	car_occupant	human	road	stay	stay	pedestrians_vs_single_pedestrian	1v1
3986	female	yes	car_occupant	NA	NA	2	car_occupant	human	road	swerve	swerve	pedestrians_vs_single_pedestrian	4v1
3986	female	yes	car_occupant	NA	NA	2	car_occupant	human	sidewalk	swerve	stay	pedestrians_vs_single_pedestrian	3v1
3986	female	yes	car_occupant	NA	NA	2	car_occupant	human	sidewalk	swerve	swerve	pedestrians_vs_single_pedestrian	4v1
3986	female	yes	car_occupant	NA	NA	2	car_occupant	human	road	stay	stay	pedestrians_vs_single_pedestrian	2v1
3986	female	yes	car_occupant	NA	NA	2	car_occupant	human	sidewalk	stay	stay	pedestrians_vs_single_pedestrian	1v1
3986	female	yes	car_occupant	NA	NA	2	car_occupant	human	sidewalk	stay	swerve	pedestrians_vs_single_pedestrian	2v1
3986	female	yes	car_occupant	NA	NA	2	car_occupant	human	road	swerve	swerve	pedestrians_vs_single_pedestrian	3v1
3992	female	yes	pedestrian	none	18-29	2	pedestrian_front	self-driving	road	swerve	stay	pedestrians_vs_single_pedestrian	3v1
3992	female	yes	pedestrian	none	18-29	2	pedestrian_front	self-driving	sidewalk	stay	swerve	pedestrians_vs_single_pedestrian	2v1
3992	female	yes	pedestrian	none	18-29	2	pedestrian_front	self-driving	road	stay	stay	pedestrians_vs_single_pedestrian	2v1
3992	female	yes	pedestrian	none	18-29	2	pedestrian_front	self-driving	sidewalk	swerve	stay	pedestrians_vs_single_pedestrian	4v1
3992	female	yes	pedestrian	none	18-29	2	pedestrian_front	self-driving	road	swerve	swerve	pedestrians_vs_single_pedestrian	4v1
3992	female	yes	pedestrian	none	18-29	2	pedestrian_front	self-driving	sidewalk	stay	swerve	pedestrians_vs_single_pedestrian	1v1
3992	female	yes	pedestrian	none	18-29	2	pedestrian_front	self-driving	sidewalk	swerve	stay	pedestrians_vs_single_pedestrian	3v1
3992	female	yes	pedestrian	none	18-29	2	pedestrian_front	self-driving	road	stay	stay	pedestrians_vs_single_pedestrian	1v1
3993	female	yes	car_occupant	NA	NA	2	car_occupant	human	sidewalk	swerve	swerve	pedestrians_vs_single_pedestrian	3v1
3993	female	yes	car_occupant	NA	NA	2	car_occupant	human	sidewalk	swerve	swerve	pedestrians_vs_single_pedestrian	4v1
3993	female	yes	car_occupant	NA	NA	2	car_occupant	human	sidewalk	stay	swerve	pedestrians_vs_single_pedestrian	1v1
3993	female	yes	car_occupant	NA	NA	2	car_occupant	human	road	swerve	swerve	pedestrians_vs_single_pedestrian	4v1
3993	female	yes	car_occupant	NA	NA	2	car_occupant	human	road	stay	swerve	pedestrians_vs_single_pedestrian	1v1
3993	female	yes	car_occupant	NA	NA	2	car_occupant	human	road	swerve	stay	pedestrians_vs_single_pedestrian	2v1
3993	female	yes	car_occupant	NA	NA	2	car_occupant	human	road	swerve	stay	pedestrians_vs_single_pedestrian	3v1
3993	female	yes	car_occupant	NA	NA	2	car_occupant	human	sidewalk	swerve	stay	pedestrians_vs_single_pedestrian	2v1
3994	female	yes	car_occupant	none	18-29	4	pedestrian_side	self-driving	road	swerve	stay	pedestrians_vs_single_pedestrian	4v1
3994	female	yes	car_occupant	none	18-29	4	pedestrian_side	self-driving	road	swerve	swerve	pedestrians_vs_single_pedestrian	3v1
3994	female	yes	car_occupant	none	18-29	4	pedestrian_side	self-driving	sidewalk	swerve	stay	pedestrians_vs_single_pedestrian	2v1
3994	female	yes	car_occupant	none	18-29	4	pedestrian_side	self-driving	sidewalk	swerve	stay	pedestrians_vs_single_pedestrian	4v1
3994	female	yes	car_occupant	none	18-29	4	pedestrian_side	self-driving	road	stay	stay	pedestrians_vs_single_pedestrian	1v1
3994	female	yes	car_occupant	none	18-29	4	pedestrian_side	self-driving	road	stay	swerve	pedestrians_vs_single_pedestrian	2v1
3994	female	yes	car_occupant	none	18-29	4	pedestrian_side	self-driving	sidewalk	stay	swerve	pedestrians_vs_single_pedestrian	1v1
3994	female	yes	car_occupant	none	18-29	4	pedestrian_side	self-driving	sidewalk	stay	swerve	pedestrians_vs_single_pedestrian	3v1
4017	male	yes	car_occupant	none	18-29	5	observer	self-driving	road	stay	stay	pedestrians_vs_single_pedestrian	2v1
4017	male	yes	car_occupant	none	18-29	5	observer	self-driving	sidewalk	stay	swerve	pedestrians_vs_single_pedestrian	4v1
4017	male	yes	car_occupant	none	18-29	5	observer	self-driving	road	stay	stay	pedestrians_vs_single_pedestrian	4v1
4017	male	yes	car_occupant	none	18-29	5	observer	self-driving	sidewalk	stay	swerve	pedestrians_vs_single_pedestrian	2v1
4017	male	yes	car_occupant	none	18-29	5	observer	self-driving	sidewalk	stay	swerve	pedestrians_vs_single_pedestrian	1v1
4017	male	yes	car_occupant	none	18-29	5	observer	self-driving	sidewalk	stay	stay	pedestrians_vs_single_pedestrian	3v1
4017	male	yes	car_occupant	none	18-29	5	observer	self-driving	road	stay	stay	pedestrians_vs_single_pedestrian	1v1
4017	male	yes	car_occupant	none	18-29	5	observer	self-driving	road	stay	swerve	pedestrians_vs_single_pedestrian	3v1
4028	male	yes	pedestrian	6 to 10 years	18-29	5	pedestrian_front	self-driving	sidewalk	swerve	swerve	pedestrians_vs_single_pedestrian	3v1
4028	male	yes	pedestrian	6 to 10 years	18-29	5	pedestrian_front	self-driving	sidewalk	swerve	swerve	pedestrians_vs_single_pedestrian	2v1
4028	male	yes	pedestrian	6 to 10 years	18-29	5	pedestrian_front	self-driving	road	swerve	swerve	pedestrians_vs_single_pedestrian	1v1
4028	male	yes	pedestrian	6 to 10 years	18-29	5	pedestrian_front	self-driving	road	swerve	swerve	pedestrians_vs_single_pedestrian	4v1
4028	male	yes	pedestrian	6 to 10 years	18-29	5	pedestrian_front	self-driving	sidewalk	swerve	swerve	pedestrians_vs_single_pedestrian	1v1
4028	male	yes	pedestrian	6 to 10 years	18-29	5	pedestrian_front	self-driving	sidewalk	swerve	stay	pedestrians_vs_single_pedestrian	4v1
4028	male	yes	pedestrian	6 to 10 years	18-29	5	pedestrian_front	self-driving	road	swerve	stay	pedestrians_vs_single_pedestrian	2v1
4028	male	yes	pedestrian	6 to 10 years	18-29	5	pedestrian_front	self-driving	road	swerve	stay	pedestrians_vs_single_pedestrian	3v1
4039	female	yes	pedestrian	none	18-29	4	pedestrian_side	self-driving	sidewalk	swerve	swerve	pedestrians_vs_single_pedestrian	4v1
4039	female	yes	pedestrian	none	18-29	4	pedestrian_side	self-driving	road	swerve	stay	pedestrians_vs_single_pedestrian	4v1
4039	female	yes	pedestrian	none	18-29	4	pedestrian_side	self-driving	sidewalk	stay	swerve	pedestrians_vs_single_pedestrian	1v1
4039	female	yes	pedestrian	none	18-29	4	pedestrian_side	self-driving	sidewalk	swerve	swerve	pedestrians_vs_single_pedestrian	3v1
4039	female	yes	pedestrian	none	18-29	4	pedestrian_side	self-driving	road	swerve	stay	pedestrians_vs_single_pedestrian	2v1
4039	female	yes	pedestrian	none	18-29	4	pedestrian_side	self-driving	road	stay	stay	pedestrians_vs_single_pedestrian	3v1
4039	female	yes	pedestrian	none	18-29	4	pedestrian_side	self-driving	sidewalk	stay	swerve	pedestrians_vs_single_pedestrian	2v1
4039	female	yes	pedestrian	none	18-29	4	pedestrian_side	self-driving	road	swerve	stay	pedestrians_vs_single_pedestrian	1v1
4043	female	yes	car_occupant	NA	NA	1	observer	human	sidewalk	stay	swerve	pedestrians_vs_single_pedestrian	2v1
4043	female	yes	car_occupant	NA	NA	1	observer	human	road	stay	stay	pedestrians_vs_single_pedestrian	1v1
4043	female	yes	car_occupant	NA	NA	1	observer	human	road	stay	swerve	pedestrians_vs_single_pedestrian	2v1
4043	female	yes	car_occupant	NA	NA	1	observer	human	sidewalk	stay	stay	pedestrians_vs_single_pedestrian	4v1
4043	female	yes	car_occupant	NA	NA	1	observer	human	sidewalk	stay	swerve	pedestrians_vs_single_pedestrian	1v1
4043	female	yes	car_occupant	NA	NA	1	observer	human	road	stay	swerve	pedestrians_vs_single_pedestrian	4v1
4043	female	yes	car_occupant	NA	NA	1	observer	human	road	stay	swerve	pedestrians_vs_single_pedestrian	3v1
4043	female	yes	car_occupant	NA	NA	1	observer	human	sidewalk	stay	stay	pedestrians_vs_single_pedestrian	3v1
4054	female	yes	pedestrian	NA	NA	3	pedestrian_side	human	road	swerve	swerve	pedestrians_vs_single_pedestrian	3v1
4054	female	yes	pedestrian	NA	NA	3	pedestrian_side	human	sidewalk	swerve	stay	pedestrians_vs_single_pedestrian	1v1
4054	female	yes	pedestrian	NA	NA	3	pedestrian_side	human	sidewalk	swerve	swerve	pedestrians_vs_single_pedestrian	2v1
4054	female	yes	pedestrian	NA	NA	3	pedestrian_side	human	road	swerve	swerve	pedestrians_vs_single_pedestrian	2v1
4054	female	yes	pedestrian	NA	NA	3	pedestrian_side	human	sidewalk	swerve	stay	pedestrians_vs_single_pedestrian	4v1
4054	female	yes	pedestrian	NA	NA	3	pedestrian_side	human	road	swerve	stay	pedestrians_vs_single_pedestrian	1v1
4054	female	yes	pedestrian	NA	NA	3	pedestrian_side	human	road	swerve	stay	pedestrians_vs_single_pedestrian	4v1
4054	female	yes	pedestrian	NA	NA	3	pedestrian_side	human	sidewalk	swerve	swerve	pedestrians_vs_single_pedestrian	3v1
4065	male	yes	car_occupant	NA	NA	4	car_occupant	human	road	swerve	swerve	pedestrians_vs_single_pedestrian	3v1
4065	male	yes	car_occupant	NA	NA	4	car_occupant	human	road	swerve	swerve	pedestrians_vs_single_pedestrian	4v1
4065	male	yes	car_occupant	NA	NA	4	car_occupant	human	sidewalk	swerve	stay	pedestrians_vs_single_pedestrian	3v1
4065	male	yes	car_occupant	NA	NA	4	car_occupant	human	sidewalk	swerve	stay	pedestrians_vs_single_pedestrian	2v1
4065	male	yes	car_occupant	NA	NA	4	car_occupant	human	sidewalk	swerve	swerve	pedestrians_vs_single_pedestrian	4v1
4065	male	yes	car_occupant	NA	NA	4	car_occupant	human	road	stay	stay	pedestrians_vs_single_pedestrian	1v1
4065	male	yes	car_occupant	NA	NA	4	car_occupant	human	sidewalk	stay	stay	pedestrians_vs_single_pedestrian	1v1
4065	male	yes	car_occupant	NA	NA	4	car_occupant	human	road	swerve	swerve	pedestrians_vs_single_pedestrian	2v1
4077	male	yes	car_occupant	6 to 10 years	18-29	1	observer	self-driving	road	stay	stay	pedestrians_vs_single_pedestrian	2v1
4077	male	yes	car_occupant	6 to 10 years	18-29	1	observer	self-driving	road	swerve	stay	pedestrians_vs_single_pedestrian	4v1
4077	male	yes	car_occupant	6 to 10 years	18-29	1	observer	self-driving	sidewalk	stay	stay	pedestrians_vs_single_pedestrian	2v1
4077	male	yes	car_occupant	6 to 10 years	18-29	1	observer	self-driving	sidewalk	stay	swerve	pedestrians_vs_single_pedestrian	3v1
4077	male	yes	car_occupant	6 to 10 years	18-29	1	observer	self-driving	sidewalk	stay	stay	pedestrians_vs_single_pedestrian	4v1
4077	male	yes	car_occupant	6 to 10 years	18-29	1	observer	self-driving	road	stay	swerve	pedestrians_vs_single_pedestrian	3v1
4077	male	yes	car_occupant	6 to 10 years	18-29	1	observer	self-driving	road	stay	swerve	pedestrians_vs_single_pedestrian	1v1
4077	male	yes	car_occupant	6 to 10 years	18-29	1	observer	self-driving	sidewalk	stay	swerve	pedestrians_vs_single_pedestrian	1v1
4082	male	yes	pedestrian	NA	NA	2	pedestrian_front	human	sidewalk	swerve	stay	pedestrians_vs_single_pedestrian	1v1
4082	male	yes	pedestrian	NA	NA	2	pedestrian_front	human	road	swerve	swerve	pedestrians_vs_single_pedestrian	1v1
4082	male	yes	pedestrian	NA	NA	2	pedestrian_front	human	sidewalk	swerve	stay	pedestrians_vs_single_pedestrian	3v1
4082	male	yes	pedestrian	NA	NA	2	pedestrian_front	human	road	swerve	swerve	pedestrians_vs_single_pedestrian	3v1
4082	male	yes	pedestrian	NA	NA	2	pedestrian_front	human	road	swerve	stay	pedestrians_vs_single_pedestrian	4v1
4082	male	yes	pedestrian	NA	NA	2	pedestrian_front	human	sidewalk	swerve	stay	pedestrians_vs_single_pedestrian	2v1
4082	male	yes	pedestrian	NA	NA	2	pedestrian_front	human	sidewalk	swerve	swerve	pedestrians_vs_single_pedestrian	4v1
4082	male	yes	pedestrian	NA	NA	2	pedestrian_front	human	road	swerve	stay	pedestrians_vs_single_pedestrian	2v1
4084	male	yes	car_occupant	NA	NA	1	pedestrian_side	human	road	stay	swerve	pedestrians_vs_single_pedestrian	3v1
4084	male	yes	car_occupant	NA	NA	1	pedestrian_side	human	sidewalk	swerve	stay	pedestrians_vs_single_pedestrian	4v1
4084	male	yes	car_occupant	NA	NA	1	pedestrian_side	human	road	stay	swerve	pedestrians_vs_single_pedestrian	1v1
4084	male	yes	car_occupant	NA	NA	1	pedestrian_side	human	sidewalk	stay	stay	pedestrians_vs_single_pedestrian	1v1
4084	male	yes	car_occupant	NA	NA	1	pedestrian_side	human	sidewalk	swerve	swerve	pedestrians_vs_single_pedestrian	2v1
4084	male	yes	car_occupant	NA	NA	1	pedestrian_side	human	road	swerve	stay	pedestrians_vs_single_pedestrian	4v1
4084	male	yes	car_occupant	NA	NA	1	pedestrian_side	human	sidewalk	swerve	stay	pedestrians_vs_single_pedestrian	3v1
4084	male	yes	car_occupant	NA	NA	1	pedestrian_side	human	road	stay	swerve	pedestrians_vs_single_pedestrian	2v1
4134	male	yes	car_occupant	6 to 10 years	18-29	4	car_occupant	self-driving	sidewalk	swerve	swerve	pedestrians_vs_single_pedestrian	4v1
4134	male	yes	car_occupant	6 to 10 years	18-29	4	car_occupant	self-driving	road	swerve	stay	pedestrians_vs_single_pedestrian	2v1
4134	male	yes	car_occupant	6 to 10 years	18-29	4	car_occupant	self-driving	road	swerve	stay	pedestrians_vs_single_pedestrian	4v1
4134	male	yes	car_occupant	6 to 10 years	18-29	4	car_occupant	self-driving	sidewalk	swerve	stay	pedestrians_vs_single_pedestrian	2v1
4134	male	yes	car_occupant	6 to 10 years	18-29	4	car_occupant	self-driving	road	swerve	stay	pedestrians_vs_single_pedestrian	3v1
4134	male	yes	car_occupant	6 to 10 years	18-29	4	car_occupant	self-driving	road	stay	swerve	pedestrians_vs_single_pedestrian	1v1
4134	male	yes	car_occupant	6 to 10 years	18-29	4	car_occupant	self-driving	sidewalk	stay	swerve	pedestrians_vs_single_pedestrian	1v1
4134	male	yes	car_occupant	6 to 10 years	18-29	4	car_occupant	self-driving	sidewalk	swerve	swerve	pedestrians_vs_single_pedestrian	3v1
4135	male	yes	pedestrian	less than 5 years	30-39	4	pedestrian_front	self-driving	road	swerve	stay	pedestrians_vs_single_pedestrian	4v1
4135	male	yes	pedestrian	less than 5 years	30-39	4	pedestrian_front	self-driving	sidewalk	swerve	stay	pedestrians_vs_single_pedestrian	3v1
4135	male	yes	pedestrian	less than 5 years	30-39	4	pedestrian_front	self-driving	road	stay	swerve	pedestrians_vs_single_pedestrian	1v1
4135	male	yes	pedestrian	less than 5 years	30-39	4	pedestrian_front	self-driving	road	stay	stay	pedestrians_vs_single_pedestrian	2v1
4135	male	yes	pedestrian	less than 5 years	30-39	4	pedestrian_front	self-driving	sidewalk	swerve	stay	pedestrians_vs_single_pedestrian	4v1
4135	male	yes	pedestrian	less than 5 years	30-39	4	pedestrian_front	self-driving	road	swerve	swerve	pedestrians_vs_single_pedestrian	3v1
4135	male	yes	pedestrian	less than 5 years	30-39	4	pedestrian_front	self-driving	sidewalk	stay	swerve	pedestrians_vs_single_pedestrian	1v1
4135	male	yes	pedestrian	less than 5 years	30-39	4	pedestrian_front	self-driving	sidewalk	stay	swerve	pedestrians_vs_single_pedestrian	2v1
4138	female	yes	car_occupant	NA	NA	1	car_occupant	human	road	swerve	stay	pedestrians_vs_single_pedestrian	3v1
4138	female	yes	car_occupant	NA	NA	1	car_occupant	human	sidewalk	stay	stay	pedestrians_vs_single_pedestrian	3v1
4138	female	yes	car_occupant	NA	NA	1	car_occupant	human	road	stay	swerve	pedestrians_vs_single_pedestrian	1v1
4138	female	yes	car_occupant	NA	NA	1	car_occupant	human	sidewalk	stay	swerve	pedestrians_vs_single_pedestrian	4v1
4138	female	yes	car_occupant	NA	NA	1	car_occupant	human	road	swerve	stay	pedestrians_vs_single_pedestrian	2v1
4138	female	yes	car_occupant	NA	NA	1	car_occupant	human	road	stay	swerve	pedestrians_vs_single_pedestrian	4v1
4138	female	yes	car_occupant	NA	NA	1	car_occupant	human	sidewalk	stay	swerve	pedestrians_vs_single_pedestrian	2v1
4138	female	yes	car_occupant	NA	NA	1	car_occupant	human	sidewalk	stay	swerve	pedestrians_vs_single_pedestrian	1v1
4139	male	yes	pedestrian	NA	NA	5	observer	human	sidewalk	stay	stay	pedestrians_vs_single_pedestrian	4v1
4139	male	yes	pedestrian	NA	NA	5	observer	human	sidewalk	stay	stay	pedestrians_vs_single_pedestrian	3v1
4139	male	yes	pedestrian	NA	NA	5	observer	human	road	stay	swerve	pedestrians_vs_single_pedestrian	1v1
4139	male	yes	pedestrian	NA	NA	5	observer	human	road	stay	stay	pedestrians_vs_single_pedestrian	2v1
4139	male	yes	pedestrian	NA	NA	5	observer	human	sidewalk	stay	stay	pedestrians_vs_single_pedestrian	1v1
4139	male	yes	pedestrian	NA	NA	5	observer	human	sidewalk	stay	swerve	pedestrians_vs_single_pedestrian	2v1
4139	male	yes	pedestrian	NA	NA	5	observer	human	road	swerve	stay	pedestrians_vs_single_pedestrian	4v1
4139	male	yes	pedestrian	NA	NA	5	observer	human	road	swerve	swerve	pedestrians_vs_single_pedestrian	3v1
4141	male	yes	car_occupant	NA	NA	3	pedestrian_side	human	sidewalk	swerve	stay	pedestrians_vs_single_pedestrian	3v1
4141	male	yes	car_occupant	NA	NA	3	pedestrian_side	human	sidewalk	swerve	swerve	pedestrians_vs_single_pedestrian	2v1
4141	male	yes	car_occupant	NA	NA	3	pedestrian_side	human	sidewalk	stay	stay	pedestrians_vs_single_pedestrian	1v1
4141	male	yes	car_occupant	NA	NA	3	pedestrian_side	human	road	swerve	stay	pedestrians_vs_single_pedestrian	4v1
4141	male	yes	car_occupant	NA	NA	3	pedestrian_side	human	road	stay	stay	pedestrians_vs_single_pedestrian	1v1
4141	male	yes	car_occupant	NA	NA	3	pedestrian_side	human	sidewalk	swerve	swerve	pedestrians_vs_single_pedestrian	4v1
4141	male	yes	car_occupant	NA	NA	3	pedestrian_side	human	road	swerve	swerve	pedestrians_vs_single_pedestrian	3v1
4141	male	yes	car_occupant	NA	NA	3	pedestrian_side	human	road	swerve	swerve	pedestrians_vs_single_pedestrian	2v1
4150	male	yes	pedestrian	more than 10 years	30-39	3	observer	self-driving	sidewalk	stay	swerve	pedestrians_vs_single_pedestrian	1v1
4150	male	yes	pedestrian	more than 10 years	30-39	3	observer	self-driving	road	swerve	stay	pedestrians_vs_single_pedestrian	3v1
4150	male	yes	pedestrian	more than 10 years	30-39	3	observer	self-driving	sidewalk	stay	stay	pedestrians_vs_single_pedestrian	4v1
4150	male	yes	pedestrian	more than 10 years	30-39	3	observer	self-driving	road	swerve	swerve	pedestrians_vs_single_pedestrian	4v1
4150	male	yes	pedestrian	more than 10 years	30-39	3	observer	self-driving	sidewalk	stay	stay	pedestrians_vs_single_pedestrian	3v1
4150	male	yes	pedestrian	more than 10 years	30-39	3	observer	self-driving	sidewalk	stay	stay	pedestrians_vs_single_pedestrian	2v1
4150	male	yes	pedestrian	more than 10 years	30-39	3	observer	self-driving	road	stay	swerve	pedestrians_vs_single_pedestrian	1v1
4150	male	yes	pedestrian	more than 10 years	30-39	3	observer	self-driving	road	swerve	swerve	pedestrians_vs_single_pedestrian	2v1
4151	female	no	pedestrian	less than 5 years	30-39	3	pedestrian_side	self-driving	sidewalk	swerve	stay	pedestrians_vs_single_pedestrian	4v1
4151	female	no	pedestrian	less than 5 years	30-39	3	pedestrian_side	self-driving	road	swerve	swerve	pedestrians_vs_single_pedestrian	1v1
4151	female	no	pedestrian	less than 5 years	30-39	3	pedestrian_side	self-driving	sidewalk	swerve	stay	pedestrians_vs_single_pedestrian	1v1
4151	female	no	pedestrian	less than 5 years	30-39	3	pedestrian_side	self-driving	road	swerve	swerve	pedestrians_vs_single_pedestrian	3v1
4151	female	no	pedestrian	less than 5 years	30-39	3	pedestrian_side	self-driving	sidewalk	swerve	stay	pedestrians_vs_single_pedestrian	2v1
4151	female	no	pedestrian	less than 5 years	30-39	3	pedestrian_side	self-driving	road	swerve	swerve	pedestrians_vs_single_pedestrian	4v1
4151	female	no	pedestrian	less than 5 years	30-39	3	pedestrian_side	self-driving	road	swerve	stay	pedestrians_vs_single_pedestrian	2v1
4151	female	no	pedestrian	less than 5 years	30-39	3	pedestrian_side	self-driving	sidewalk	swerve	swerve	pedestrians_vs_single_pedestrian	3v1
4171	female	yes	pedestrian	NA	NA	1	pedestrian_front	human	road	swerve	stay	pedestrians_vs_single_pedestrian	1v1
4171	female	yes	pedestrian	NA	NA	1	pedestrian_front	human	road	swerve	stay	pedestrians_vs_single_pedestrian	3v1
4171	female	yes	pedestrian	NA	NA	1	pedestrian_front	human	road	swerve	swerve	pedestrians_vs_single_pedestrian	2v1
4171	female	yes	pedestrian	NA	NA	1	pedestrian_front	human	sidewalk	stay	swerve	pedestrians_vs_single_pedestrian	3v1
4171	female	yes	pedestrian	NA	NA	1	pedestrian_front	human	sidewalk	swerve	stay	pedestrians_vs_single_pedestrian	1v1
4171	female	yes	pedestrian	NA	NA	1	pedestrian_front	human	sidewalk	stay	stay	pedestrians_vs_single_pedestrian	4v1
4171	female	yes	pedestrian	NA	NA	1	pedestrian_front	human	road	stay	swerve	pedestrians_vs_single_pedestrian	4v1
4171	female	yes	pedestrian	NA	NA	1	pedestrian_front	human	sidewalk	stay	stay	pedestrians_vs_single_pedestrian	2v1
4173	female	yes	car_occupant	less than 5 years	30-39	4	car_occupant	self-driving	road	swerve	stay	pedestrians_vs_single_pedestrian	3v1
4173	female	yes	car_occupant	less than 5 years	30-39	4	car_occupant	self-driving	sidewalk	swerve	swerve	pedestrians_vs_single_pedestrian	3v1
4173	female	yes	car_occupant	less than 5 years	30-39	4	car_occupant	self-driving	road	swerve	stay	pedestrians_vs_single_pedestrian	2v1
4173	female	yes	car_occupant	less than 5 years	30-39	4	car_occupant	self-driving	sidewalk	swerve	swerve	pedestrians_vs_single_pedestrian	2v1
4173	female	yes	car_occupant	less than 5 years	30-39	4	car_occupant	self-driving	road	swerve	swerve	pedestrians_vs_single_pedestrian	4v1
4173	female	yes	car_occupant	less than 5 years	30-39	4	car_occupant	self-driving	sidewalk	stay	stay	pedestrians_vs_single_pedestrian	1v1
4173	female	yes	car_occupant	less than 5 years	30-39	4	car_occupant	self-driving	road	stay	stay	pedestrians_vs_single_pedestrian	1v1
4173	female	yes	car_occupant	less than 5 years	30-39	4	car_occupant	self-driving	sidewalk	swerve	stay	pedestrians_vs_single_pedestrian	4v1
4180	female	no	pedestrian	none	50-59	2	observer	self-driving	road	swerve	swerve	pedestrians_vs_single_pedestrian	4v1
4180	female	no	pedestrian	none	50-59	2	observer	self-driving	road	swerve	swerve	pedestrians_vs_single_pedestrian	3v1
4180	female	no	pedestrian	none	50-59	2	observer	self-driving	sidewalk	swerve	stay	pedestrians_vs_single_pedestrian	4v1
4180	female	no	pedestrian	none	50-59	2	observer	self-driving	road	swerve	swerve	pedestrians_vs_single_pedestrian	1v1
4180	female	no	pedestrian	none	50-59	2	observer	self-driving	sidewalk	swerve	swerve	pedestrians_vs_single_pedestrian	1v1
4180	female	no	pedestrian	none	50-59	2	observer	self-driving	sidewalk	swerve	stay	pedestrians_vs_single_pedestrian	3v1
4180	female	no	pedestrian	none	50-59	2	observer	self-driving	road	swerve	stay	pedestrians_vs_single_pedestrian	2v1
4180	female	no	pedestrian	none	50-59	2	observer	self-driving	sidewalk	swerve	stay	pedestrians_vs_single_pedestrian	2v1
4198	female	yes	car_occupant	NA	NA	2	observer	human	sidewalk	swerve	swerve	pedestrians_vs_single_pedestrian	3v1
4198	female	yes	car_occupant	NA	NA	2	observer	human	road	swerve	swerve	pedestrians_vs_single_pedestrian	3v1
4198	female	yes	car_occupant	NA	NA	2	observer	human	sidewalk	stay	stay	pedestrians_vs_single_pedestrian	1v1
4198	female	yes	car_occupant	NA	NA	2	observer	human	sidewalk	swerve	stay	pedestrians_vs_single_pedestrian	2v1
4198	female	yes	car_occupant	NA	NA	2	observer	human	road	swerve	stay	pedestrians_vs_single_pedestrian	4v1
4198	female	yes	car_occupant	NA	NA	2	observer	human	sidewalk	swerve	stay	pedestrians_vs_single_pedestrian	4v1
4198	female	yes	car_occupant	NA	NA	2	observer	human	road	stay	swerve	pedestrians_vs_single_pedestrian	1v1
4198	female	yes	car_occupant	NA	NA	2	observer	human	road	swerve	stay	pedestrians_vs_single_pedestrian	2v1
4207	male	yes	car_occupant	more than 10 years	60-69	4	car_occupant	self-driving	road	swerve	stay	pedestrians_vs_single_pedestrian	3v1
4207	male	yes	car_occupant	more than 10 years	60-69	4	car_occupant	self-driving	sidewalk	swerve	swerve	pedestrians_vs_single_pedestrian	2v1
4207	male	yes	car_occupant	more than 10 years	60-69	4	car_occupant	self-driving	road	swerve	swerve	pedestrians_vs_single_pedestrian	2v1
4207	male	yes	car_occupant	more than 10 years	60-69	4	car_occupant	self-driving	sidewalk	swerve	stay	pedestrians_vs_single_pedestrian	3v1
4207	male	yes	car_occupant	more than 10 years	60-69	4	car_occupant	self-driving	road	swerve	stay	pedestrians_vs_single_pedestrian	4v1
4207	male	yes	car_occupant	more than 10 years	60-69	4	car_occupant	self-driving	sidewalk	stay	swerve	pedestrians_vs_single_pedestrian	1v1
4207	male	yes	car_occupant	more than 10 years	60-69	4	car_occupant	self-driving	sidewalk	swerve	swerve	pedestrians_vs_single_pedestrian	4v1
4207	male	yes	car_occupant	more than 10 years	60-69	4	car_occupant	self-driving	road	stay	swerve	pedestrians_vs_single_pedestrian	1v1
4209	male	yes	car_occupant	NA	NA	4	car_occupant	human	sidewalk	swerve	swerve	pedestrians_vs_single_pedestrian	4v1
4209	male	yes	car_occupant	NA	NA	4	car_occupant	human	sidewalk	swerve	swerve	pedestrians_vs_single_pedestrian	2v1
4209	male	yes	car_occupant	NA	NA	4	car_occupant	human	road	stay	stay	pedestrians_vs_single_pedestrian	1v1
4209	male	yes	car_occupant	NA	NA	4	car_occupant	human	road	swerve	swerve	pedestrians_vs_single_pedestrian	2v1
4209	male	yes	car_occupant	NA	NA	4	car_occupant	human	sidewalk	stay	stay	pedestrians_vs_single_pedestrian	1v1
4209	male	yes	car_occupant	NA	NA	4	car_occupant	human	road	swerve	swerve	pedestrians_vs_single_pedestrian	3v1
4209	male	yes	car_occupant	NA	NA	4	car_occupant	human	sidewalk	swerve	swerve	pedestrians_vs_single_pedestrian	3v1
4209	male	yes	car_occupant	NA	NA	4	car_occupant	human	road	swerve	stay	pedestrians_vs_single_pedestrian	4v1
4215	female	yes	pedestrian	none	18-29	4	pedestrian_side	self-driving	sidewalk	swerve	stay	pedestrians_vs_single_pedestrian	3v1
4215	female	yes	pedestrian	none	18-29	4	pedestrian_side	self-driving	road	swerve	swerve	pedestrians_vs_single_pedestrian	2v1
4215	female	yes	pedestrian	none	18-29	4	pedestrian_side	self-driving	sidewalk	swerve	swerve	pedestrians_vs_single_pedestrian	2v1
4215	female	yes	pedestrian	none	18-29	4	pedestrian_side	self-driving	sidewalk	swerve	stay	pedestrians_vs_single_pedestrian	4v1
4215	female	yes	pedestrian	none	18-29	4	pedestrian_side	self-driving	road	swerve	stay	pedestrians_vs_single_pedestrian	3v1
4215	female	yes	pedestrian	none	18-29	4	pedestrian_side	self-driving	road	swerve	stay	pedestrians_vs_single_pedestrian	1v1
4215	female	yes	pedestrian	none	18-29	4	pedestrian_side	self-driving	road	swerve	swerve	pedestrians_vs_single_pedestrian	4v1
4215	female	yes	pedestrian	none	18-29	4	pedestrian_side	self-driving	sidewalk	swerve	swerve	pedestrians_vs_single_pedestrian	1v1
4224	female	yes	car_occupant	NA	NA	2	pedestrian_side	human	road	swerve	swerve	pedestrians_vs_single_pedestrian	1v1
4224	female	yes	car_occupant	NA	NA	2	pedestrian_side	human	sidewalk	swerve	stay	pedestrians_vs_single_pedestrian	2v1
4224	female	yes	car_occupant	NA	NA	2	pedestrian_side	human	sidewalk	stay	swerve	pedestrians_vs_single_pedestrian	1v1
4224	female	yes	car_occupant	NA	NA	2	pedestrian_side	human	road	swerve	stay	pedestrians_vs_single_pedestrian	3v1
4224	female	yes	car_occupant	NA	NA	2	pedestrian_side	human	sidewalk	swerve	swerve	pedestrians_vs_single_pedestrian	4v1
4224	female	yes	car_occupant	NA	NA	2	pedestrian_side	human	road	swerve	swerve	pedestrians_vs_single_pedestrian	2v1
4224	female	yes	car_occupant	NA	NA	2	pedestrian_side	human	road	swerve	stay	pedestrians_vs_single_pedestrian	4v1
4224	female	yes	car_occupant	NA	NA	2	pedestrian_side	human	sidewalk	swerve	stay	pedestrians_vs_single_pedestrian	3v1
4227	male	yes	pedestrian	NA	NA	5	pedestrian_side	human	road	stay	swerve	pedestrians_vs_single_pedestrian	4v1
4227	male	yes	pedestrian	NA	NA	5	pedestrian_side	human	sidewalk	stay	stay	pedestrians_vs_single_pedestrian	3v1
4227	male	yes	pedestrian	NA	NA	5	pedestrian_side	human	road	stay	stay	pedestrians_vs_single_pedestrian	1v1
4227	male	yes	pedestrian	NA	NA	5	pedestrian_side	human	road	stay	swerve	pedestrians_vs_single_pedestrian	3v1
4227	male	yes	pedestrian	NA	NA	5	pedestrian_side	human	road	stay	stay	pedestrians_vs_single_pedestrian	2v1
4227	male	yes	pedestrian	NA	NA	5	pedestrian_side	human	sidewalk	stay	stay	pedestrians_vs_single_pedestrian	4v1
4227	male	yes	pedestrian	NA	NA	5	pedestrian_side	human	sidewalk	stay	swerve	pedestrians_vs_single_pedestrian	1v1
4227	male	yes	pedestrian	NA	NA	5	pedestrian_side	human	sidewalk	stay	swerve	pedestrians_vs_single_pedestrian	2v1
4243	female	no	car_occupant	NA	NA	2	observer	human	road	stay	stay	pedestrians_vs_single_pedestrian	1v1
4243	female	no	car_occupant	NA	NA	2	observer	human	road	stay	stay	pedestrians_vs_single_pedestrian	2v1
4243	female	no	car_occupant	NA	NA	2	observer	human	sidewalk	stay	swerve	pedestrians_vs_single_pedestrian	4v1
4243	female	no	car_occupant	NA	NA	2	observer	human	road	stay	stay	pedestrians_vs_single_pedestrian	4v1
4243	female	no	car_occupant	NA	NA	2	observer	human	sidewalk	stay	swerve	pedestrians_vs_single_pedestrian	3v1
4243	female	no	car_occupant	NA	NA	2	observer	human	road	stay	stay	pedestrians_vs_single_pedestrian	3v1
4243	female	no	car_occupant	NA	NA	2	observer	human	sidewalk	stay	swerve	pedestrians_vs_single_pedestrian	1v1
4243	female	no	car_occupant	NA	NA	2	observer	human	sidewalk	stay	swerve	pedestrians_vs_single_pedestrian	2v1
4264	female	yes	pedestrian	NA	NA	3	pedestrian_front	human	road	stay	stay	pedestrians_vs_single_pedestrian	1v1
4264	female	yes	pedestrian	NA	NA	3	pedestrian_front	human	road	stay	stay	pedestrians_vs_single_pedestrian	2v1
4264	female	yes	pedestrian	NA	NA	3	pedestrian_front	human	road	swerve	swerve	pedestrians_vs_single_pedestrian	3v1
4264	female	yes	pedestrian	NA	NA	3	pedestrian_front	human	sidewalk	swerve	stay	pedestrians_vs_single_pedestrian	1v1
4264	female	yes	pedestrian	NA	NA	3	pedestrian_front	human	road	swerve	stay	pedestrians_vs_single_pedestrian	4v1
4264	female	yes	pedestrian	NA	NA	3	pedestrian_front	human	sidewalk	swerve	stay	pedestrians_vs_single_pedestrian	4v1
4264	female	yes	pedestrian	NA	NA	3	pedestrian_front	human	sidewalk	swerve	swerve	pedestrians_vs_single_pedestrian	2v1
4264	female	yes	pedestrian	NA	NA	3	pedestrian_front	human	sidewalk	swerve	stay	pedestrians_vs_single_pedestrian	3v1
4282	female	yes	car_occupant	NA	NA	4	car_occupant	human	sidewalk	swerve	swerve	pedestrians_vs_single_pedestrian	2v1
4282	female	yes	car_occupant	NA	NA	4	car_occupant	human	road	swerve	swerve	pedestrians_vs_single_pedestrian	2v1
4282	female	yes	car_occupant	NA	NA	4	car_occupant	human	sidewalk	swerve	stay	pedestrians_vs_single_pedestrian	3v1
4282	female	yes	car_occupant	NA	NA	4	car_occupant	human	road	stay	stay	pedestrians_vs_single_pedestrian	1v1
4282	female	yes	car_occupant	NA	NA	4	car_occupant	human	sidewalk	stay	swerve	pedestrians_vs_single_pedestrian	1v1
4282	female	yes	car_occupant	NA	NA	4	car_occupant	human	road	swerve	swerve	pedestrians_vs_single_pedestrian	3v1
4282	female	yes	car_occupant	NA	NA	4	car_occupant	human	road	swerve	stay	pedestrians_vs_single_pedestrian	4v1
4282	female	yes	car_occupant	NA	NA	4	car_occupant	human	sidewalk	stay	stay	pedestrians_vs_single_pedestrian	4v1
4318	female	yes	pedestrian	none	18-29	4	observer	self-driving	road	swerve	swerve	pedestrians_vs_single_pedestrian	3v1
4318	female	yes	pedestrian	none	18-29	4	observer	self-driving	sidewalk	stay	swerve	pedestrians_vs_single_pedestrian	1v1
4318	female	yes	pedestrian	none	18-29	4	observer	self-driving	road	stay	swerve	pedestrians_vs_single_pedestrian	1v1
4318	female	yes	pedestrian	none	18-29	4	observer	self-driving	sidewalk	swerve	swerve	pedestrians_vs_single_pedestrian	4v1
4318	female	yes	pedestrian	none	18-29	4	observer	self-driving	sidewalk	swerve	stay	pedestrians_vs_single_pedestrian	3v1
4318	female	yes	pedestrian	none	18-29	4	observer	self-driving	road	swerve	stay	pedestrians_vs_single_pedestrian	4v1
4318	female	yes	pedestrian	none	18-29	4	observer	self-driving	sidewalk	swerve	stay	pedestrians_vs_single_pedestrian	2v1
4318	female	yes	pedestrian	none	18-29	4	observer	self-driving	road	swerve	stay	pedestrians_vs_single_pedestrian	2v1
4320	male	yes	car_occupant	more than 10 years	40-49	3	car_occupant	self-driving	sidewalk	stay	stay	pedestrians_vs_single_pedestrian	3v1
4320	male	yes	car_occupant	more than 10 years	40-49	3	car_occupant	self-driving	road	swerve	swerve	pedestrians_vs_single_pedestrian	3v1
4320	male	yes	car_occupant	more than 10 years	40-49	3	car_occupant	self-driving	sidewalk	stay	swerve	pedestrians_vs_single_pedestrian	1v1
4320	male	yes	car_occupant	more than 10 years	40-49	3	car_occupant	self-driving	sidewalk	stay	swerve	pedestrians_vs_single_pedestrian	4v1
4320	male	yes	car_occupant	more than 10 years	40-49	3	car_occupant	self-driving	road	swerve	stay	pedestrians_vs_single_pedestrian	2v1
4320	male	yes	car_occupant	more than 10 years	40-49	3	car_occupant	self-driving	sidewalk	stay	stay	pedestrians_vs_single_pedestrian	2v1
4320	male	yes	car_occupant	more than 10 years	40-49	3	car_occupant	self-driving	road	stay	swerve	pedestrians_vs_single_pedestrian	1v1
4320	male	yes	car_occupant	more than 10 years	40-49	3	car_occupant	self-driving	road	swerve	swerve	pedestrians_vs_single_pedestrian	4v1
4348	female	yes	pedestrian	more than 10 years	40-49	3	observer	self-driving	sidewalk	stay	stay	pedestrians_vs_single_pedestrian	1v1
4348	female	yes	pedestrian	more than 10 years	40-49	3	observer	self-driving	sidewalk	swerve	swerve	pedestrians_vs_single_pedestrian	2v1
4348	female	yes	pedestrian	more than 10 years	40-49	3	observer	self-driving	road	swerve	stay	pedestrians_vs_single_pedestrian	4v1
4348	female	yes	pedestrian	more than 10 years	40-49	3	observer	self-driving	sidewalk	swerve	swerve	pedestrians_vs_single_pedestrian	3v1
4348	female	yes	pedestrian	more than 10 years	40-49	3	observer	self-driving	sidewalk	swerve	stay	pedestrians_vs_single_pedestrian	4v1
4348	female	yes	pedestrian	more than 10 years	40-49	3	observer	self-driving	road	swerve	swerve	pedestrians_vs_single_pedestrian	2v1
4348	female	yes	pedestrian	more than 10 years	40-49	3	observer	self-driving	road	swerve	swerve	pedestrians_vs_single_pedestrian	3v1
4348	female	yes	pedestrian	more than 10 years	40-49	3	observer	self-driving	road	swerve	stay	pedestrians_vs_single_pedestrian	1v1
4365	female	yes	pedestrian	NA	NA	1	pedestrian_front	human	road	swerve	stay	pedestrians_vs_single_pedestrian	3v1
4365	female	yes	pedestrian	NA	NA	1	pedestrian_front	human	sidewalk	stay	stay	pedestrians_vs_single_pedestrian	2v1
4365	female	yes	pedestrian	NA	NA	1	pedestrian_front	human	sidewalk	swerve	stay	pedestrians_vs_single_pedestrian	3v1
4365	female	yes	pedestrian	NA	NA	1	pedestrian_front	human	sidewalk	swerve	stay	pedestrians_vs_single_pedestrian	4v1
4365	female	yes	pedestrian	NA	NA	1	pedestrian_front	human	road	stay	stay	pedestrians_vs_single_pedestrian	2v1
4365	female	yes	pedestrian	NA	NA	1	pedestrian_front	human	road	swerve	swerve	pedestrians_vs_single_pedestrian	4v1
4365	female	yes	pedestrian	NA	NA	1	pedestrian_front	human	road	stay	swerve	pedestrians_vs_single_pedestrian	1v1
4365	female	yes	pedestrian	NA	NA	1	pedestrian_front	human	sidewalk	stay	swerve	pedestrians_vs_single_pedestrian	1v1
4368	male	yes	car_occupant	NA	NA	3	car_occupant	human	sidewalk	stay	stay	pedestrians_vs_single_pedestrian	1v1
4368	male	yes	car_occupant	NA	NA	3	car_occupant	human	sidewalk	swerve	stay	pedestrians_vs_single_pedestrian	2v1
4368	male	yes	car_occupant	NA	NA	3	car_occupant	human	road	swerve	swerve	pedestrians_vs_single_pedestrian	3v1
4368	male	yes	car_occupant	NA	NA	3	car_occupant	human	road	stay	swerve	pedestrians_vs_single_pedestrian	1v1
4368	male	yes	car_occupant	NA	NA	3	car_occupant	human	road	swerve	stay	pedestrians_vs_single_pedestrian	4v1
4368	male	yes	car_occupant	NA	NA	3	car_occupant	human	sidewalk	swerve	swerve	pedestrians_vs_single_pedestrian	3v1
4368	male	yes	car_occupant	NA	NA	3	car_occupant	human	road	swerve	stay	pedestrians_vs_single_pedestrian	2v1
4368	male	yes	car_occupant	NA	NA	3	car_occupant	human	sidewalk	swerve	swerve	pedestrians_vs_single_pedestrian	4v1
4369	male	yes	pedestrian	NA	NA	3	pedestrian_side	human	road	swerve	stay	pedestrians_vs_single_pedestrian	3v1
4369	male	yes	pedestrian	NA	NA	3	pedestrian_side	human	sidewalk	swerve	swerve	pedestrians_vs_single_pedestrian	4v1
4369	male	yes	pedestrian	NA	NA	3	pedestrian_side	human	road	swerve	stay	pedestrians_vs_single_pedestrian	1v1
4369	male	yes	pedestrian	NA	NA	3	pedestrian_side	human	sidewalk	swerve	swerve	pedestrians_vs_single_pedestrian	3v1
4369	male	yes	pedestrian	NA	NA	3	pedestrian_side	human	road	swerve	swerve	pedestrians_vs_single_pedestrian	2v1
4369	male	yes	pedestrian	NA	NA	3	pedestrian_side	human	sidewalk	swerve	stay	pedestrians_vs_single_pedestrian	1v1
4369	male	yes	pedestrian	NA	NA	3	pedestrian_side	human	sidewalk	swerve	swerve	pedestrians_vs_single_pedestrian	2v1
4369	male	yes	pedestrian	NA	NA	3	pedestrian_side	human	road	swerve	stay	pedestrians_vs_single_pedestrian	4v1
4371	female	yes	pedestrian	6 to 10 years	18-29	3	pedestrian_side	self-driving	sidewalk	swerve	stay	pedestrians_vs_single_pedestrian	4v1
4371	female	yes	pedestrian	6 to 10 years	18-29	3	pedestrian_side	self-driving	road	swerve	stay	pedestrians_vs_single_pedestrian	3v1
4371	female	yes	pedestrian	6 to 10 years	18-29	3	pedestrian_side	self-driving	road	swerve	swerve	pedestrians_vs_single_pedestrian	4v1
4371	female	yes	pedestrian	6 to 10 years	18-29	3	pedestrian_side	self-driving	road	stay	swerve	pedestrians_vs_single_pedestrian	1v1
4371	female	yes	pedestrian	6 to 10 years	18-29	3	pedestrian_side	self-driving	sidewalk	swerve	swerve	pedestrians_vs_single_pedestrian	2v1
4371	female	yes	pedestrian	6 to 10 years	18-29	3	pedestrian_side	self-driving	road	swerve	swerve	pedestrians_vs_single_pedestrian	2v1
4371	female	yes	pedestrian	6 to 10 years	18-29	3	pedestrian_side	self-driving	sidewalk	stay	stay	pedestrians_vs_single_pedestrian	1v1
4371	female	yes	pedestrian	6 to 10 years	18-29	3	pedestrian_side	self-driving	sidewalk	swerve	stay	pedestrians_vs_single_pedestrian	3v1
4423	female	yes	car_occupant	NA	NA	2	observer	human	sidewalk	swerve	swerve	pedestrians_vs_single_pedestrian	3v1
4423	female	yes	car_occupant	NA	NA	2	observer	human	road	swerve	swerve	pedestrians_vs_single_pedestrian	1v1
4423	female	yes	car_occupant	NA	NA	2	observer	human	sidewalk	stay	stay	pedestrians_vs_single_pedestrian	4v1
4423	female	yes	car_occupant	NA	NA	2	observer	human	sidewalk	swerve	stay	pedestrians_vs_single_pedestrian	2v1
4423	female	yes	car_occupant	NA	NA	2	observer	human	road	swerve	stay	pedestrians_vs_single_pedestrian	3v1
4423	female	yes	car_occupant	NA	NA	2	observer	human	road	swerve	swerve	pedestrians_vs_single_pedestrian	2v1
4423	female	yes	car_occupant	NA	NA	2	observer	human	road	swerve	swerve	pedestrians_vs_single_pedestrian	4v1
4423	female	yes	car_occupant	NA	NA	2	observer	human	sidewalk	swerve	swerve	pedestrians_vs_single_pedestrian	1v1
4424	male	no	car_occupant	more than 10 years	50-59	1	car_occupant	self-driving	road	swerve	swerve	pedestrians_vs_single_pedestrian	3v1
4424	male	no	car_occupant	more than 10 years	50-59	1	car_occupant	self-driving	sidewalk	swerve	stay	pedestrians_vs_single_pedestrian	1v1
4424	male	no	car_occupant	more than 10 years	50-59	1	car_occupant	self-driving	sidewalk	swerve	stay	pedestrians_vs_single_pedestrian	3v1
4424	male	no	car_occupant	more than 10 years	50-59	1	car_occupant	self-driving	road	swerve	stay	pedestrians_vs_single_pedestrian	1v1
4424	male	no	car_occupant	more than 10 years	50-59	1	car_occupant	self-driving	road	swerve	swerve	pedestrians_vs_single_pedestrian	2v1
4424	male	no	car_occupant	more than 10 years	50-59	1	car_occupant	self-driving	road	swerve	swerve	pedestrians_vs_single_pedestrian	4v1
4424	male	no	car_occupant	more than 10 years	50-59	1	car_occupant	self-driving	sidewalk	swerve	swerve	pedestrians_vs_single_pedestrian	2v1
4424	male	no	car_occupant	more than 10 years	50-59	1	car_occupant	self-driving	sidewalk	swerve	stay	pedestrians_vs_single_pedestrian	4v1
4449	female	yes	car_occupant	NA	NA	2	observer	human	sidewalk	swerve	stay	pedestrians_vs_single_pedestrian	2v1
4449	female	yes	car_occupant	NA	NA	2	observer	human	road	stay	stay	pedestrians_vs_single_pedestrian	1v1
4449	female	yes	car_occupant	NA	NA	2	observer	human	sidewalk	swerve	stay	pedestrians_vs_single_pedestrian	3v1
4449	female	yes	car_occupant	NA	NA	2	observer	human	road	swerve	swerve	pedestrians_vs_single_pedestrian	3v1
4449	female	yes	car_occupant	NA	NA	2	observer	human	road	swerve	swerve	pedestrians_vs_single_pedestrian	2v1
4449	female	yes	car_occupant	NA	NA	2	observer	human	road	swerve	swerve	pedestrians_vs_single_pedestrian	4v1
4449	female	yes	car_occupant	NA	NA	2	observer	human	sidewalk	stay	swerve	pedestrians_vs_single_pedestrian	1v1
4449	female	yes	car_occupant	NA	NA	2	observer	human	sidewalk	swerve	swerve	pedestrians_vs_single_pedestrian	4v1
4452	female	yes	car_occupant	NA	NA	3	pedestrian_side	human	road	swerve	stay	pedestrians_vs_single_pedestrian	4v1
4452	female	yes	car_occupant	NA	NA	3	pedestrian_side	human	sidewalk	swerve	swerve	pedestrians_vs_single_pedestrian	2v1
4452	female	yes	car_occupant	NA	NA	3	pedestrian_side	human	road	swerve	stay	pedestrians_vs_single_pedestrian	1v1
4452	female	yes	car_occupant	NA	NA	3	pedestrian_side	human	sidewalk	swerve	stay	pedestrians_vs_single_pedestrian	3v1
4452	female	yes	car_occupant	NA	NA	3	pedestrian_side	human	road	swerve	stay	pedestrians_vs_single_pedestrian	3v1
4452	female	yes	car_occupant	NA	NA	3	pedestrian_side	human	road	swerve	swerve	pedestrians_vs_single_pedestrian	2v1
4452	female	yes	car_occupant	NA	NA	3	pedestrian_side	human	sidewalk	swerve	swerve	pedestrians_vs_single_pedestrian	1v1
4452	female	yes	car_occupant	NA	NA	3	pedestrian_side	human	sidewalk	stay	swerve	pedestrians_vs_single_pedestrian	4v1
4458	male	yes	pedestrian	none	18-29	3	observer	self-driving	road	swerve	swerve	pedestrians_vs_single_pedestrian	4v1
4458	male	yes	pedestrian	none	18-29	3	observer	self-driving	road	swerve	stay	pedestrians_vs_single_pedestrian	3v1
4458	male	yes	pedestrian	none	18-29	3	observer	self-driving	sidewalk	swerve	stay	pedestrians_vs_single_pedestrian	4v1
4458	male	yes	pedestrian	none	18-29	3	observer	self-driving	road	swerve	stay	pedestrians_vs_single_pedestrian	1v1
4458	male	yes	pedestrian	none	18-29	3	observer	self-driving	sidewalk	swerve	stay	pedestrians_vs_single_pedestrian	2v1
4458	male	yes	pedestrian	none	18-29	3	observer	self-driving	sidewalk	swerve	stay	pedestrians_vs_single_pedestrian	3v1
4458	male	yes	pedestrian	none	18-29	3	observer	self-driving	road	swerve	swerve	pedestrians_vs_single_pedestrian	2v1
4458	male	yes	pedestrian	none	18-29	3	observer	self-driving	sidewalk	swerve	stay	pedestrians_vs_single_pedestrian	1v1
4504	female	yes	car_occupant	NA	NA	1	pedestrian_front	human	sidewalk	swerve	stay	pedestrians_vs_single_pedestrian	3v1
4504	female	yes	car_occupant	NA	NA	1	pedestrian_front	human	road	stay	stay	pedestrians_vs_single_pedestrian	2v1
4504	female	yes	car_occupant	NA	NA	1	pedestrian_front	human	sidewalk	stay	stay	pedestrians_vs_single_pedestrian	1v1
4504	female	yes	car_occupant	NA	NA	1	pedestrian_front	human	sidewalk	stay	stay	pedestrians_vs_single_pedestrian	2v1
4504	female	yes	car_occupant	NA	NA	1	pedestrian_front	human	road	swerve	swerve	pedestrians_vs_single_pedestrian	3v1
4504	female	yes	car_occupant	NA	NA	1	pedestrian_front	human	road	swerve	stay	pedestrians_vs_single_pedestrian	4v1
4504	female	yes	car_occupant	NA	NA	1	pedestrian_front	human	sidewalk	swerve	swerve	pedestrians_vs_single_pedestrian	4v1
4504	female	yes	car_occupant	NA	NA	1	pedestrian_front	human	road	swerve	swerve	pedestrians_vs_single_pedestrian	1v1
4506	female	yes	pedestrian	more than 10 years	40-49	4	car_occupant	self-driving	road	swerve	stay	pedestrians_vs_single_pedestrian	3v1
4506	female	yes	pedestrian	more than 10 years	40-49	4	car_occupant	self-driving	road	swerve	swerve	pedestrians_vs_single_pedestrian	4v1
4506	female	yes	pedestrian	more than 10 years	40-49	4	car_occupant	self-driving	sidewalk	swerve	swerve	pedestrians_vs_single_pedestrian	3v1
4506	female	yes	pedestrian	more than 10 years	40-49	4	car_occupant	self-driving	sidewalk	swerve	swerve	pedestrians_vs_single_pedestrian	4v1
4506	female	yes	pedestrian	more than 10 years	40-49	4	car_occupant	self-driving	sidewalk	stay	stay	pedestrians_vs_single_pedestrian	1v1
4506	female	yes	pedestrian	more than 10 years	40-49	4	car_occupant	self-driving	sidewalk	swerve	stay	pedestrians_vs_single_pedestrian	2v1
4506	female	yes	pedestrian	more than 10 years	40-49	4	car_occupant	self-driving	road	swerve	swerve	pedestrians_vs_single_pedestrian	2v1
4506	female	yes	pedestrian	more than 10 years	40-49	4	car_occupant	self-driving	road	stay	stay	pedestrians_vs_single_pedestrian	1v1
4510	female	yes	car_occupant	NA	NA	4	car_occupant	human	sidewalk	stay	stay	pedestrians_vs_single_pedestrian	1v1
4510	female	yes	car_occupant	NA	NA	4	car_occupant	human	road	swerve	swerve	pedestrians_vs_single_pedestrian	2v1
4510	female	yes	car_occupant	NA	NA	4	car_occupant	human	road	swerve	stay	pedestrians_vs_single_pedestrian	4v1
4510	female	yes	car_occupant	NA	NA	4	car_occupant	human	sidewalk	swerve	swerve	pedestrians_vs_single_pedestrian	3v1
4510	female	yes	car_occupant	NA	NA	4	car_occupant	human	road	stay	swerve	pedestrians_vs_single_pedestrian	1v1
4510	female	yes	car_occupant	NA	NA	4	car_occupant	human	road	swerve	swerve	pedestrians_vs_single_pedestrian	3v1
4510	female	yes	car_occupant	NA	NA	4	car_occupant	human	sidewalk	stay	stay	pedestrians_vs_single_pedestrian	2v1
4510	female	yes	car_occupant	NA	NA	4	car_occupant	human	sidewalk	swerve	stay	pedestrians_vs_single_pedestrian	4v1
4538	NA	yes	car_occupant	NA	18-29	5	pedestrian_front	self-driving	sidewalk	swerve	swerve	pedestrians_vs_single_pedestrian	3v1
4538	NA	yes	car_occupant	NA	18-29	5	pedestrian_front	self-driving	sidewalk	swerve	stay	pedestrians_vs_single_pedestrian	2v1
4538	NA	yes	car_occupant	NA	18-29	5	pedestrian_front	self-driving	sidewalk	swerve	swerve	pedestrians_vs_single_pedestrian	4v1
4538	NA	yes	car_occupant	NA	18-29	5	pedestrian_front	self-driving	road	stay	stay	pedestrians_vs_single_pedestrian	3v1
4538	NA	yes	car_occupant	NA	18-29	5	pedestrian_front	self-driving	road	stay	swerve	pedestrians_vs_single_pedestrian	4v1
4538	NA	yes	car_occupant	NA	18-29	5	pedestrian_front	self-driving	road	stay	stay	pedestrians_vs_single_pedestrian	1v1
4538	NA	yes	car_occupant	NA	18-29	5	pedestrian_front	self-driving	road	stay	stay	pedestrians_vs_single_pedestrian	2v1
4538	NA	yes	car_occupant	NA	18-29	5	pedestrian_front	self-driving	sidewalk	stay	swerve	pedestrians_vs_single_pedestrian	1v1
4548	female	yes	pedestrian	NA	NA	2	pedestrian_front	human	road	swerve	swerve	pedestrians_vs_single_pedestrian	3v1
4548	female	yes	pedestrian	NA	NA	2	pedestrian_front	human	sidewalk	swerve	swerve	pedestrians_vs_single_pedestrian	4v1
4548	female	yes	pedestrian	NA	NA	2	pedestrian_front	human	road	stay	swerve	pedestrians_vs_single_pedestrian	1v1
4548	female	yes	pedestrian	NA	NA	2	pedestrian_front	human	sidewalk	swerve	swerve	pedestrians_vs_single_pedestrian	3v1
4548	female	yes	pedestrian	NA	NA	2	pedestrian_front	human	sidewalk	stay	swerve	pedestrians_vs_single_pedestrian	1v1
4548	female	yes	pedestrian	NA	NA	2	pedestrian_front	human	road	stay	stay	pedestrians_vs_single_pedestrian	4v1
4548	female	yes	pedestrian	NA	NA	2	pedestrian_front	human	road	stay	stay	pedestrians_vs_single_pedestrian	2v1
4548	female	yes	pedestrian	NA	NA	2	pedestrian_front	human	sidewalk	stay	stay	pedestrians_vs_single_pedestrian	2v1
4555	female	no	car_occupant	none	18-29	3	car_occupant	self-driving	sidewalk	swerve	swerve	pedestrians_vs_single_pedestrian	4v1
4555	female	no	car_occupant	none	18-29	3	car_occupant	self-driving	road	stay	stay	pedestrians_vs_single_pedestrian	1v1
4555	female	no	car_occupant	none	18-29	3	car_occupant	self-driving	sidewalk	swerve	stay	pedestrians_vs_single_pedestrian	2v1
4555	female	no	car_occupant	none	18-29	3	car_occupant	self-driving	sidewalk	swerve	stay	pedestrians_vs_single_pedestrian	1v1
4555	female	no	car_occupant	none	18-29	3	car_occupant	self-driving	sidewalk	swerve	swerve	pedestrians_vs_single_pedestrian	3v1
4555	female	no	car_occupant	none	18-29	3	car_occupant	self-driving	road	swerve	stay	pedestrians_vs_single_pedestrian	3v1
4555	female	no	car_occupant	none	18-29	3	car_occupant	self-driving	road	swerve	swerve	pedestrians_vs_single_pedestrian	4v1
4555	female	no	car_occupant	none	18-29	3	car_occupant	self-driving	road	swerve	swerve	pedestrians_vs_single_pedestrian	2v1
4562	female	yes	car_occupant	NA	NA	4	car_occupant	human	sidewalk	stay	stay	pedestrians_vs_single_pedestrian	1v1
4562	female	yes	car_occupant	NA	NA	4	car_occupant	human	sidewalk	swerve	stay	pedestrians_vs_single_pedestrian	4v1
4562	female	yes	car_occupant	NA	NA	4	car_occupant	human	road	swerve	stay	pedestrians_vs_single_pedestrian	3v1
4562	female	yes	car_occupant	NA	NA	4	car_occupant	human	sidewalk	swerve	stay	pedestrians_vs_single_pedestrian	3v1
4562	female	yes	car_occupant	NA	NA	4	car_occupant	human	sidewalk	swerve	stay	pedestrians_vs_single_pedestrian	2v1
4562	female	yes	car_occupant	NA	NA	4	car_occupant	human	road	stay	swerve	pedestrians_vs_single_pedestrian	1v1
4562	female	yes	car_occupant	NA	NA	4	car_occupant	human	road	swerve	swerve	pedestrians_vs_single_pedestrian	4v1
4562	female	yes	car_occupant	NA	NA	4	car_occupant	human	road	swerve	swerve	pedestrians_vs_single_pedestrian	2v1
4584	female	yes	pedestrian	none	30-39	1	pedestrian_front	self-driving	sidewalk	stay	stay	pedestrians_vs_single_pedestrian	4v1
4584	female	yes	pedestrian	none	30-39	1	pedestrian_front	self-driving	road	stay	swerve	pedestrians_vs_single_pedestrian	4v1
4584	female	yes	pedestrian	none	30-39	1	pedestrian_front	self-driving	sidewalk	stay	stay	pedestrians_vs_single_pedestrian	2v1
4584	female	yes	pedestrian	none	30-39	1	pedestrian_front	self-driving	road	stay	stay	pedestrians_vs_single_pedestrian	2v1
4584	female	yes	pedestrian	none	30-39	1	pedestrian_front	self-driving	sidewalk	stay	stay	pedestrians_vs_single_pedestrian	1v1
4584	female	yes	pedestrian	none	30-39	1	pedestrian_front	self-driving	sidewalk	swerve	stay	pedestrians_vs_single_pedestrian	3v1
4584	female	yes	pedestrian	none	30-39	1	pedestrian_front	self-driving	road	stay	swerve	pedestrians_vs_single_pedestrian	1v1
4584	female	yes	pedestrian	none	30-39	1	pedestrian_front	self-driving	road	swerve	swerve	pedestrians_vs_single_pedestrian	3v1
4659	female	yes	car_occupant	NA	NA	5	observer	human	sidewalk	stay	stay	pedestrians_vs_single_pedestrian	1v1
4659	female	yes	car_occupant	NA	NA	5	observer	human	sidewalk	swerve	stay	pedestrians_vs_single_pedestrian	3v1
4659	female	yes	car_occupant	NA	NA	5	observer	human	road	stay	swerve	pedestrians_vs_single_pedestrian	1v1
4659	female	yes	car_occupant	NA	NA	5	observer	human	road	swerve	swerve	pedestrians_vs_single_pedestrian	4v1
4659	female	yes	car_occupant	NA	NA	5	observer	human	road	swerve	stay	pedestrians_vs_single_pedestrian	3v1
4659	female	yes	car_occupant	NA	NA	5	observer	human	sidewalk	stay	swerve	pedestrians_vs_single_pedestrian	2v1
4659	female	yes	car_occupant	NA	NA	5	observer	human	road	swerve	stay	pedestrians_vs_single_pedestrian	2v1
4659	female	yes	car_occupant	NA	NA	5	observer	human	sidewalk	stay	stay	pedestrians_vs_single_pedestrian	4v1
4671	male	yes	pedestrian	NA	NA	5	car_occupant	human	sidewalk	swerve	stay	pedestrians_vs_single_pedestrian	4v1
4671	male	yes	pedestrian	NA	NA	5	car_occupant	human	road	swerve	stay	pedestrians_vs_single_pedestrian	3v1
4671	male	yes	pedestrian	NA	NA	5	car_occupant	human	sidewalk	swerve	stay	pedestrians_vs_single_pedestrian	2v1
4671	male	yes	pedestrian	NA	NA	5	car_occupant	human	road	swerve	stay	pedestrians_vs_single_pedestrian	4v1
4671	male	yes	pedestrian	NA	NA	5	car_occupant	human	road	swerve	swerve	pedestrians_vs_single_pedestrian	2v1
4671	male	yes	pedestrian	NA	NA	5	car_occupant	human	sidewalk	swerve	swerve	pedestrians_vs_single_pedestrian	3v1
4671	male	yes	pedestrian	NA	NA	5	car_occupant	human	sidewalk	stay	swerve	pedestrians_vs_single_pedestrian	1v1
4671	male	yes	pedestrian	NA	NA	5	car_occupant	human	road	stay	stay	pedestrians_vs_single_pedestrian	1v1
4700	female	yes	pedestrian	6 to 10 years	18-29	3	pedestrian_side	self-driving	road	swerve	swerve	pedestrians_vs_single_pedestrian	1v1
4700	female	yes	pedestrian	6 to 10 years	18-29	3	pedestrian_side	self-driving	road	swerve	swerve	pedestrians_vs_single_pedestrian	3v1
4700	female	yes	pedestrian	6 to 10 years	18-29	3	pedestrian_side	self-driving	sidewalk	swerve	stay	pedestrians_vs_single_pedestrian	2v1
4700	female	yes	pedestrian	6 to 10 years	18-29	3	pedestrian_side	self-driving	sidewalk	swerve	stay	pedestrians_vs_single_pedestrian	3v1
4700	female	yes	pedestrian	6 to 10 years	18-29	3	pedestrian_side	self-driving	road	swerve	stay	pedestrians_vs_single_pedestrian	4v1
4700	female	yes	pedestrian	6 to 10 years	18-29	3	pedestrian_side	self-driving	sidewalk	stay	swerve	pedestrians_vs_single_pedestrian	1v1
4700	female	yes	pedestrian	6 to 10 years	18-29	3	pedestrian_side	self-driving	sidewalk	swerve	stay	pedestrians_vs_single_pedestrian	4v1
4700	female	yes	pedestrian	6 to 10 years	18-29	3	pedestrian_side	self-driving	road	swerve	swerve	pedestrians_vs_single_pedestrian	2v1
4719	female	yes	pedestrian	none	18-29	3	observer	self-driving	sidewalk	swerve	stay	pedestrians_vs_single_pedestrian	1v1
4719	female	yes	pedestrian	none	18-29	3	observer	self-driving	road	swerve	swerve	pedestrians_vs_single_pedestrian	4v1
4719	female	yes	pedestrian	none	18-29	3	observer	self-driving	sidewalk	swerve	swerve	pedestrians_vs_single_pedestrian	4v1
4719	female	yes	pedestrian	none	18-29	3	observer	self-driving	road	swerve	swerve	pedestrians_vs_single_pedestrian	2v1
4719	female	yes	pedestrian	none	18-29	3	observer	self-driving	road	swerve	swerve	pedestrians_vs_single_pedestrian	3v1
4719	female	yes	pedestrian	none	18-29	3	observer	self-driving	road	swerve	stay	pedestrians_vs_single_pedestrian	1v1
4719	female	yes	pedestrian	none	18-29	3	observer	self-driving	sidewalk	swerve	stay	pedestrians_vs_single_pedestrian	3v1
4719	female	yes	pedestrian	none	18-29	3	observer	self-driving	sidewalk	swerve	swerve	pedestrians_vs_single_pedestrian	2v1
4725	female	yes	car_occupant	none	18-29	4	pedestrian_front	self-driving	sidewalk	stay	swerve	pedestrians_vs_single_pedestrian	2v1
4725	female	yes	car_occupant	none	18-29	4	pedestrian_front	self-driving	sidewalk	swerve	stay	pedestrians_vs_single_pedestrian	3v1
4725	female	yes	car_occupant	none	18-29	4	pedestrian_front	self-driving	sidewalk	stay	stay	pedestrians_vs_single_pedestrian	1v1
4725	female	yes	car_occupant	none	18-29	4	pedestrian_front	self-driving	road	swerve	stay	pedestrians_vs_single_pedestrian	3v1
4725	female	yes	car_occupant	none	18-29	4	pedestrian_front	self-driving	sidewalk	swerve	stay	pedestrians_vs_single_pedestrian	4v1
4725	female	yes	car_occupant	none	18-29	4	pedestrian_front	self-driving	road	swerve	stay	pedestrians_vs_single_pedestrian	2v1
4725	female	yes	car_occupant	none	18-29	4	pedestrian_front	self-driving	road	swerve	swerve	pedestrians_vs_single_pedestrian	4v1
4725	female	yes	car_occupant	none	18-29	4	pedestrian_front	self-driving	road	stay	stay	pedestrians_vs_single_pedestrian	1v1
4735	female	no	pedestrian	none	18-29	3	pedestrian_side	self-driving	road	swerve	swerve	pedestrians_vs_single_pedestrian	3v1
4735	female	no	pedestrian	none	18-29	3	pedestrian_side	self-driving	sidewalk	swerve	stay	pedestrians_vs_single_pedestrian	3v1
4735	female	no	pedestrian	none	18-29	3	pedestrian_side	self-driving	sidewalk	swerve	swerve	pedestrians_vs_single_pedestrian	4v1
4735	female	no	pedestrian	none	18-29	3	pedestrian_side	self-driving	road	stay	stay	pedestrians_vs_single_pedestrian	1v1
4735	female	no	pedestrian	none	18-29	3	pedestrian_side	self-driving	sidewalk	stay	swerve	pedestrians_vs_single_pedestrian	1v1
4735	female	no	pedestrian	none	18-29	3	pedestrian_side	self-driving	road	swerve	stay	pedestrians_vs_single_pedestrian	4v1
4735	female	no	pedestrian	none	18-29	3	pedestrian_side	self-driving	sidewalk	stay	swerve	pedestrians_vs_single_pedestrian	2v1
4735	female	no	pedestrian	none	18-29	3	pedestrian_side	self-driving	road	stay	stay	pedestrians_vs_single_pedestrian	2v1
4742	male	yes	pedestrian	less than 5 years	18-29	3	observer	human	road	swerve	swerve	pedestrians_vs_single_pedestrian	3v1
4742	male	yes	pedestrian	less than 5 years	18-29	3	observer	human	sidewalk	swerve	stay	pedestrians_vs_single_pedestrian	2v1
4742	male	yes	pedestrian	less than 5 years	18-29	3	observer	human	sidewalk	swerve	swerve	pedestrians_vs_single_pedestrian	4v1
4742	male	yes	pedestrian	less than 5 years	18-29	3	observer	human	road	swerve	swerve	pedestrians_vs_single_pedestrian	2v1
4742	male	yes	pedestrian	less than 5 years	18-29	3	observer	human	road	swerve	stay	pedestrians_vs_single_pedestrian	4v1
4742	male	yes	pedestrian	less than 5 years	18-29	3	observer	human	sidewalk	stay	stay	pedestrians_vs_single_pedestrian	1v1
4742	male	yes	pedestrian	less than 5 years	18-29	3	observer	human	sidewalk	swerve	stay	pedestrians_vs_single_pedestrian	3v1
4742	male	yes	pedestrian	less than 5 years	18-29	3	observer	human	road	swerve	stay	pedestrians_vs_single_pedestrian	1v1
4745	female	yes	car_occupant	none	18-29	4	car_occupant	self-driving	sidewalk	swerve	swerve	pedestrians_vs_single_pedestrian	1v1
4745	female	yes	car_occupant	none	18-29	4	car_occupant	self-driving	road	swerve	swerve	pedestrians_vs_single_pedestrian	3v1
4745	female	yes	car_occupant	none	18-29	4	car_occupant	self-driving	road	swerve	stay	pedestrians_vs_single_pedestrian	2v1
4745	female	yes	car_occupant	none	18-29	4	car_occupant	self-driving	sidewalk	swerve	swerve	pedestrians_vs_single_pedestrian	2v1
4745	female	yes	car_occupant	none	18-29	4	car_occupant	self-driving	sidewalk	swerve	swerve	pedestrians_vs_single_pedestrian	4v1
4745	female	yes	car_occupant	none	18-29	4	car_occupant	self-driving	road	swerve	stay	pedestrians_vs_single_pedestrian	4v1
4745	female	yes	car_occupant	none	18-29	4	car_occupant	self-driving	sidewalk	swerve	swerve	pedestrians_vs_single_pedestrian	3v1
4745	female	yes	car_occupant	none	18-29	4	car_occupant	self-driving	road	stay	stay	pedestrians_vs_single_pedestrian	1v1
4754	female	no	pedestrian	none	18-29	1	pedestrian_front	human	road	stay	swerve	pedestrians_vs_single_pedestrian	2v1
4754	female	no	pedestrian	none	18-29	1	pedestrian_front	human	sidewalk	swerve	stay	pedestrians_vs_single_pedestrian	3v1
4754	female	no	pedestrian	none	18-29	1	pedestrian_front	human	road	swerve	swerve	pedestrians_vs_single_pedestrian	3v1
4754	female	no	pedestrian	none	18-29	1	pedestrian_front	human	sidewalk	stay	stay	pedestrians_vs_single_pedestrian	2v1
4754	female	no	pedestrian	none	18-29	1	pedestrian_front	human	sidewalk	swerve	swerve	pedestrians_vs_single_pedestrian	4v1
4754	female	no	pedestrian	none	18-29	1	pedestrian_front	human	road	swerve	swerve	pedestrians_vs_single_pedestrian	4v1
4754	female	no	pedestrian	none	18-29	1	pedestrian_front	human	sidewalk	stay	swerve	pedestrians_vs_single_pedestrian	1v1
4754	female	no	pedestrian	none	18-29	1	pedestrian_front	human	road	stay	swerve	pedestrians_vs_single_pedestrian	1v1
4755	male	yes	pedestrian	none	18-29	4	pedestrian_front	human	sidewalk	stay	stay	pedestrians_vs_single_pedestrian	3v1
4755	male	yes	pedestrian	none	18-29	4	pedestrian_front	human	sidewalk	stay	swerve	pedestrians_vs_single_pedestrian	4v1
4755	male	yes	pedestrian	none	18-29	4	pedestrian_front	human	road	stay	stay	pedestrians_vs_single_pedestrian	4v1
4755	male	yes	pedestrian	none	18-29	4	pedestrian_front	human	road	stay	swerve	pedestrians_vs_single_pedestrian	3v1
4755	male	yes	pedestrian	none	18-29	4	pedestrian_front	human	sidewalk	stay	stay	pedestrians_vs_single_pedestrian	1v1
4755	male	yes	pedestrian	none	18-29	4	pedestrian_front	human	sidewalk	stay	stay	pedestrians_vs_single_pedestrian	2v1
4755	male	yes	pedestrian	none	18-29	4	pedestrian_front	human	road	stay	swerve	pedestrians_vs_single_pedestrian	2v1
4755	male	yes	pedestrian	none	18-29	4	pedestrian_front	human	road	stay	stay	pedestrians_vs_single_pedestrian	1v1
4773	male	yes	car_occupant	less than 5 years	30-39	3	observer	self-driving	sidewalk	swerve	stay	pedestrians_vs_single_pedestrian	3v1
4773	male	yes	car_occupant	less than 5 years	30-39	3	observer	self-driving	road	stay	stay	pedestrians_vs_single_pedestrian	2v1
4773	male	yes	car_occupant	less than 5 years	30-39	3	observer	self-driving	sidewalk	swerve	swerve	pedestrians_vs_single_pedestrian	2v1
4773	male	yes	car_occupant	less than 5 years	30-39	3	observer	self-driving	road	stay	stay	pedestrians_vs_single_pedestrian	1v1
4773	male	yes	car_occupant	less than 5 years	30-39	3	observer	self-driving	sidewalk	swerve	stay	pedestrians_vs_single_pedestrian	4v1
4773	male	yes	car_occupant	less than 5 years	30-39	3	observer	self-driving	sidewalk	stay	swerve	pedestrians_vs_single_pedestrian	1v1
4773	male	yes	car_occupant	less than 5 years	30-39	3	observer	self-driving	road	swerve	swerve	pedestrians_vs_single_pedestrian	3v1
4773	male	yes	car_occupant	less than 5 years	30-39	3	observer	self-driving	road	swerve	stay	pedestrians_vs_single_pedestrian	4v1
4785	female	yes	pedestrian	none	18-29	3	car_occupant	human	sidewalk	swerve	swerve	pedestrians_vs_single_pedestrian	2v1
4785	female	yes	pedestrian	none	18-29	3	car_occupant	human	road	swerve	swerve	pedestrians_vs_single_pedestrian	3v1
4785	female	yes	pedestrian	none	18-29	3	car_occupant	human	sidewalk	swerve	swerve	pedestrians_vs_single_pedestrian	3v1
4785	female	yes	pedestrian	none	18-29	3	car_occupant	human	road	swerve	stay	pedestrians_vs_single_pedestrian	4v1
4785	female	yes	pedestrian	none	18-29	3	car_occupant	human	sidewalk	stay	swerve	pedestrians_vs_single_pedestrian	1v1
4785	female	yes	pedestrian	none	18-29	3	car_occupant	human	sidewalk	swerve	stay	pedestrians_vs_single_pedestrian	4v1
4785	female	yes	pedestrian	none	18-29	3	car_occupant	human	road	stay	stay	pedestrians_vs_single_pedestrian	1v1
4785	female	yes	pedestrian	none	18-29	3	car_occupant	human	road	swerve	swerve	pedestrians_vs_single_pedestrian	2v1
4806	female	yes	pedestrian	none	18-29	5	car_occupant	human	road	swerve	swerve	pedestrians_vs_single_pedestrian	2v1
4806	female	yes	pedestrian	none	18-29	5	car_occupant	human	road	swerve	swerve	pedestrians_vs_single_pedestrian	1v1
4806	female	yes	pedestrian	none	18-29	5	car_occupant	human	sidewalk	stay	swerve	pedestrians_vs_single_pedestrian	1v1
4806	female	yes	pedestrian	none	18-29	5	car_occupant	human	sidewalk	swerve	swerve	pedestrians_vs_single_pedestrian	4v1
4806	female	yes	pedestrian	none	18-29	5	car_occupant	human	road	swerve	stay	pedestrians_vs_single_pedestrian	4v1
4806	female	yes	pedestrian	none	18-29	5	car_occupant	human	sidewalk	swerve	stay	pedestrians_vs_single_pedestrian	3v1
4806	female	yes	pedestrian	none	18-29	5	car_occupant	human	sidewalk	swerve	swerve	pedestrians_vs_single_pedestrian	2v1
4806	female	yes	pedestrian	none	18-29	5	car_occupant	human	road	swerve	stay	pedestrians_vs_single_pedestrian	3v1
4817	female	yes	pedestrian	none	18-29	4	car_occupant	self-driving	road	swerve	swerve	pedestrians_vs_single_pedestrian	2v1
4817	female	yes	pedestrian	none	18-29	4	car_occupant	self-driving	sidewalk	swerve	stay	pedestrians_vs_single_pedestrian	2v1
4817	female	yes	pedestrian	none	18-29	4	car_occupant	self-driving	sidewalk	stay	swerve	pedestrians_vs_single_pedestrian	1v1
4817	female	yes	pedestrian	none	18-29	4	car_occupant	self-driving	road	stay	swerve	pedestrians_vs_single_pedestrian	1v1
4817	female	yes	pedestrian	none	18-29	4	car_occupant	self-driving	sidewalk	stay	stay	pedestrians_vs_single_pedestrian	4v1
4817	female	yes	pedestrian	none	18-29	4	car_occupant	self-driving	sidewalk	stay	swerve	pedestrians_vs_single_pedestrian	3v1
4817	female	yes	pedestrian	none	18-29	4	car_occupant	self-driving	road	swerve	stay	pedestrians_vs_single_pedestrian	4v1
4817	female	yes	pedestrian	none	18-29	4	car_occupant	self-driving	road	swerve	swerve	pedestrians_vs_single_pedestrian	3v1
4820	female	yes	car_occupant	none	18-29	1	pedestrian_front	self-driving	road	swerve	stay	pedestrians_vs_single_pedestrian	4v1
4820	female	yes	car_occupant	none	18-29	1	pedestrian_front	self-driving	sidewalk	stay	swerve	pedestrians_vs_single_pedestrian	2v1
4820	female	yes	car_occupant	none	18-29	1	pedestrian_front	self-driving	sidewalk	swerve	swerve	pedestrians_vs_single_pedestrian	3v1
4820	female	yes	car_occupant	none	18-29	1	pedestrian_front	self-driving	road	swerve	swerve	pedestrians_vs_single_pedestrian	3v1
4820	female	yes	car_occupant	none	18-29	1	pedestrian_front	self-driving	road	swerve	swerve	pedestrians_vs_single_pedestrian	2v1
4820	female	yes	car_occupant	none	18-29	1	pedestrian_front	self-driving	road	stay	stay	pedestrians_vs_single_pedestrian	1v1
4820	female	yes	car_occupant	none	18-29	1	pedestrian_front	self-driving	sidewalk	swerve	swerve	pedestrians_vs_single_pedestrian	4v1
4820	female	yes	car_occupant	none	18-29	1	pedestrian_front	self-driving	sidewalk	stay	swerve	pedestrians_vs_single_pedestrian	1v1
4824	female	yes	pedestrian	none	18-29	3	observer	self-driving	sidewalk	swerve	stay	pedestrians_vs_single_pedestrian	4v1
4824	female	yes	pedestrian	none	18-29	3	observer	self-driving	road	swerve	stay	pedestrians_vs_single_pedestrian	4v1
4824	female	yes	pedestrian	none	18-29	3	observer	self-driving	sidewalk	swerve	swerve	pedestrians_vs_single_pedestrian	3v1
4824	female	yes	pedestrian	none	18-29	3	observer	self-driving	sidewalk	swerve	stay	pedestrians_vs_single_pedestrian	2v1
4824	female	yes	pedestrian	none	18-29	3	observer	self-driving	road	swerve	swerve	pedestrians_vs_single_pedestrian	3v1
4824	female	yes	pedestrian	none	18-29	3	observer	self-driving	road	stay	swerve	pedestrians_vs_single_pedestrian	1v1
4824	female	yes	pedestrian	none	18-29	3	observer	self-driving	road	swerve	stay	pedestrians_vs_single_pedestrian	2v1
4824	female	yes	pedestrian	none	18-29	3	observer	self-driving	sidewalk	stay	swerve	pedestrians_vs_single_pedestrian	1v1
4825	male	yes	pedestrian	none	18-29	4	pedestrian_side	human	road	stay	stay	pedestrians_vs_single_pedestrian	4v1
4825	male	yes	pedestrian	none	18-29	4	pedestrian_side	human	sidewalk	stay	swerve	pedestrians_vs_single_pedestrian	2v1
4825	male	yes	pedestrian	none	18-29	4	pedestrian_side	human	road	stay	stay	pedestrians_vs_single_pedestrian	1v1
4825	male	yes	pedestrian	none	18-29	4	pedestrian_side	human	road	stay	stay	pedestrians_vs_single_pedestrian	2v1
4825	male	yes	pedestrian	none	18-29	4	pedestrian_side	human	sidewalk	stay	stay	pedestrians_vs_single_pedestrian	1v1
4825	male	yes	pedestrian	none	18-29	4	pedestrian_side	human	road	stay	swerve	pedestrians_vs_single_pedestrian	3v1
4825	male	yes	pedestrian	none	18-29	4	pedestrian_side	human	sidewalk	stay	swerve	pedestrians_vs_single_pedestrian	4v1
4825	male	yes	pedestrian	none	18-29	4	pedestrian_side	human	sidewalk	stay	swerve	pedestrians_vs_single_pedestrian	3v1
4830	female	yes	car_occupant	none	18-29	2	observer	human	road	stay	swerve	pedestrians_vs_single_pedestrian	1v1
4830	female	yes	car_occupant	none	18-29	2	observer	human	sidewalk	stay	stay	pedestrians_vs_single_pedestrian	4v1
4830	female	yes	car_occupant	none	18-29	2	observer	human	road	swerve	swerve	pedestrians_vs_single_pedestrian	2v1
4830	female	yes	car_occupant	none	18-29	2	observer	human	sidewalk	stay	swerve	pedestrians_vs_single_pedestrian	1v1
4830	female	yes	car_occupant	none	18-29	2	observer	human	road	swerve	swerve	pedestrians_vs_single_pedestrian	3v1
4830	female	yes	car_occupant	none	18-29	2	observer	human	sidewalk	stay	stay	pedestrians_vs_single_pedestrian	2v1
4830	female	yes	car_occupant	none	18-29	2	observer	human	sidewalk	stay	swerve	pedestrians_vs_single_pedestrian	3v1
4830	female	yes	car_occupant	none	18-29	2	observer	human	road	swerve	stay	pedestrians_vs_single_pedestrian	4v1
4831	female	yes	pedestrian	none	18-29	3	observer	human	sidewalk	swerve	stay	pedestrians_vs_single_pedestrian	4v1
4831	female	yes	pedestrian	none	18-29	3	observer	human	road	stay	stay	pedestrians_vs_single_pedestrian	1v1
4831	female	yes	pedestrian	none	18-29	3	observer	human	road	swerve	swerve	pedestrians_vs_single_pedestrian	3v1
4831	female	yes	pedestrian	none	18-29	3	observer	human	road	swerve	stay	pedestrians_vs_single_pedestrian	2v1
4831	female	yes	pedestrian	none	18-29	3	observer	human	sidewalk	swerve	stay	pedestrians_vs_single_pedestrian	2v1
4831	female	yes	pedestrian	none	18-29	3	observer	human	sidewalk	stay	swerve	pedestrians_vs_single_pedestrian	1v1
4831	female	yes	pedestrian	none	18-29	3	observer	human	sidewalk	swerve	stay	pedestrians_vs_single_pedestrian	3v1
4831	female	yes	pedestrian	none	18-29	3	observer	human	road	swerve	stay	pedestrians_vs_single_pedestrian	4v1
4833	female	yes	car_occupant	none	18-29	4	observer	self-driving	road	swerve	swerve	pedestrians_vs_single_pedestrian	3v1
4833	female	yes	car_occupant	none	18-29	4	observer	self-driving	road	swerve	stay	pedestrians_vs_single_pedestrian	1v1
4833	female	yes	car_occupant	none	18-29	4	observer	self-driving	sidewalk	swerve	stay	pedestrians_vs_single_pedestrian	2v1
4833	female	yes	car_occupant	none	18-29	4	observer	self-driving	sidewalk	swerve	stay	pedestrians_vs_single_pedestrian	4v1
4833	female	yes	car_occupant	none	18-29	4	observer	self-driving	sidewalk	swerve	swerve	pedestrians_vs_single_pedestrian	3v1
4833	female	yes	car_occupant	none	18-29	4	observer	self-driving	road	swerve	stay	pedestrians_vs_single_pedestrian	4v1
4833	female	yes	car_occupant	none	18-29	4	observer	self-driving	sidewalk	stay	swerve	pedestrians_vs_single_pedestrian	1v1
4833	female	yes	car_occupant	none	18-29	4	observer	self-driving	road	swerve	swerve	pedestrians_vs_single_pedestrian	2v1
4834	male	yes	car_occupant	none	18-29	1	observer	self-driving	sidewalk	stay	stay	pedestrians_vs_single_pedestrian	4v1
4834	male	yes	car_occupant	none	18-29	1	observer	self-driving	road	stay	swerve	pedestrians_vs_single_pedestrian	4v1
4834	male	yes	car_occupant	none	18-29	1	observer	self-driving	road	swerve	stay	pedestrians_vs_single_pedestrian	3v1
4834	male	yes	car_occupant	none	18-29	1	observer	self-driving	sidewalk	stay	swerve	pedestrians_vs_single_pedestrian	2v1
4834	male	yes	car_occupant	none	18-29	1	observer	self-driving	sidewalk	stay	swerve	pedestrians_vs_single_pedestrian	3v1
4834	male	yes	car_occupant	none	18-29	1	observer	self-driving	road	stay	swerve	pedestrians_vs_single_pedestrian	1v1
4834	male	yes	car_occupant	none	18-29	1	observer	self-driving	sidewalk	stay	swerve	pedestrians_vs_single_pedestrian	1v1
4834	male	yes	car_occupant	none	18-29	1	observer	self-driving	road	stay	stay	pedestrians_vs_single_pedestrian	2v1
4843	female	yes	car_occupant	none	18-29	3	car_occupant	human	road	swerve	swerve	pedestrians_vs_single_pedestrian	4v1
4843	female	yes	car_occupant	none	18-29	3	car_occupant	human	road	swerve	swerve	pedestrians_vs_single_pedestrian	3v1
4843	female	yes	car_occupant	none	18-29	3	car_occupant	human	road	swerve	swerve	pedestrians_vs_single_pedestrian	1v1
4843	female	yes	car_occupant	none	18-29	3	car_occupant	human	sidewalk	swerve	stay	pedestrians_vs_single_pedestrian	4v1
4843	female	yes	car_occupant	none	18-29	3	car_occupant	human	sidewalk	swerve	stay	pedestrians_vs_single_pedestrian	3v1
4843	female	yes	car_occupant	none	18-29	3	car_occupant	human	sidewalk	stay	swerve	pedestrians_vs_single_pedestrian	1v1
4843	female	yes	car_occupant	none	18-29	3	car_occupant	human	road	swerve	swerve	pedestrians_vs_single_pedestrian	2v1
4843	female	yes	car_occupant	none	18-29	3	car_occupant	human	sidewalk	swerve	stay	pedestrians_vs_single_pedestrian	2v1
4853	female	yes	pedestrian	none	18-29	2	car_occupant	self-driving	sidewalk	swerve	stay	pedestrians_vs_single_pedestrian	3v1
4853	female	yes	pedestrian	none	18-29	2	car_occupant	self-driving	sidewalk	swerve	stay	pedestrians_vs_single_pedestrian	4v1
4853	female	yes	pedestrian	none	18-29	2	car_occupant	self-driving	road	swerve	swerve	pedestrians_vs_single_pedestrian	3v1
4853	female	yes	pedestrian	none	18-29	2	car_occupant	self-driving	road	swerve	swerve	pedestrians_vs_single_pedestrian	2v1
4853	female	yes	pedestrian	none	18-29	2	car_occupant	self-driving	sidewalk	swerve	swerve	pedestrians_vs_single_pedestrian	2v1
4853	female	yes	pedestrian	none	18-29	2	car_occupant	self-driving	road	swerve	stay	pedestrians_vs_single_pedestrian	1v1
4853	female	yes	pedestrian	none	18-29	2	car_occupant	self-driving	sidewalk	stay	stay	pedestrians_vs_single_pedestrian	1v1
4853	female	yes	pedestrian	none	18-29	2	car_occupant	self-driving	road	swerve	stay	pedestrians_vs_single_pedestrian	4v1
4859	female	no	car_occupant	none	30-39	2	pedestrian_front	self-driving	road	stay	swerve	pedestrians_vs_single_pedestrian	1v1
4859	female	no	car_occupant	none	30-39	2	pedestrian_front	self-driving	sidewalk	stay	swerve	pedestrians_vs_single_pedestrian	2v1
4859	female	no	car_occupant	none	30-39	2	pedestrian_front	self-driving	road	stay	swerve	pedestrians_vs_single_pedestrian	2v1
4859	female	no	car_occupant	none	30-39	2	pedestrian_front	self-driving	road	swerve	stay	pedestrians_vs_single_pedestrian	4v1
4859	female	no	car_occupant	none	30-39	2	pedestrian_front	self-driving	sidewalk	swerve	stay	pedestrians_vs_single_pedestrian	3v1
4859	female	no	car_occupant	none	30-39	2	pedestrian_front	self-driving	sidewalk	stay	swerve	pedestrians_vs_single_pedestrian	1v1
4859	female	no	car_occupant	none	30-39	2	pedestrian_front	self-driving	sidewalk	swerve	stay	pedestrians_vs_single_pedestrian	4v1
4859	female	no	car_occupant	none	30-39	2	pedestrian_front	self-driving	road	swerve	stay	pedestrians_vs_single_pedestrian	3v1
4895	female	yes	car_occupant	NA	18-29	2	car_occupant	human	road	swerve	swerve	pedestrians_vs_single_pedestrian	4v1
4895	female	yes	car_occupant	NA	18-29	2	car_occupant	human	road	swerve	stay	pedestrians_vs_single_pedestrian	3v1
4895	female	yes	car_occupant	NA	18-29	2	car_occupant	human	sidewalk	swerve	stay	pedestrians_vs_single_pedestrian	4v1
4895	female	yes	car_occupant	NA	18-29	2	car_occupant	human	sidewalk	stay	stay	pedestrians_vs_single_pedestrian	1v1
4895	female	yes	car_occupant	NA	18-29	2	car_occupant	human	sidewalk	swerve	swerve	pedestrians_vs_single_pedestrian	2v1
4895	female	yes	car_occupant	NA	18-29	2	car_occupant	human	road	stay	swerve	pedestrians_vs_single_pedestrian	1v1
4895	female	yes	car_occupant	NA	18-29	2	car_occupant	human	road	swerve	stay	pedestrians_vs_single_pedestrian	2v1
4895	female	yes	car_occupant	NA	18-29	2	car_occupant	human	sidewalk	swerve	swerve	pedestrians_vs_single_pedestrian	3v1
4926	male	yes	car_occupant	6 to 10 years	18-29	4	observer	human	road	stay	stay	pedestrians_vs_single_pedestrian	4v1
4926	male	yes	car_occupant	6 to 10 years	18-29	4	observer	human	sidewalk	stay	stay	pedestrians_vs_single_pedestrian	4v1
4926	male	yes	car_occupant	6 to 10 years	18-29	4	observer	human	sidewalk	stay	stay	pedestrians_vs_single_pedestrian	3v1
4926	male	yes	car_occupant	6 to 10 years	18-29	4	observer	human	road	stay	swerve	pedestrians_vs_single_pedestrian	3v1
4926	male	yes	car_occupant	6 to 10 years	18-29	4	observer	human	sidewalk	stay	stay	pedestrians_vs_single_pedestrian	1v1
4926	male	yes	car_occupant	6 to 10 years	18-29	4	observer	human	road	stay	swerve	pedestrians_vs_single_pedestrian	1v1
4926	male	yes	car_occupant	6 to 10 years	18-29	4	observer	human	road	swerve	swerve	pedestrians_vs_single_pedestrian	2v1
4926	male	yes	car_occupant	6 to 10 years	18-29	4	observer	human	sidewalk	stay	swerve	pedestrians_vs_single_pedestrian	2v1
4929	male	yes	car_occupant	less than 5 years	30-39	4	car_occupant	self-driving	road	swerve	stay	pedestrians_vs_single_pedestrian	3v1
4929	male	yes	car_occupant	less than 5 years	30-39	4	car_occupant	self-driving	sidewalk	swerve	stay	pedestrians_vs_single_pedestrian	4v1
4929	male	yes	car_occupant	less than 5 years	30-39	4	car_occupant	self-driving	road	swerve	stay	pedestrians_vs_single_pedestrian	2v1
4929	male	yes	car_occupant	less than 5 years	30-39	4	car_occupant	self-driving	sidewalk	stay	stay	pedestrians_vs_single_pedestrian	3v1
4929	male	yes	car_occupant	less than 5 years	30-39	4	car_occupant	self-driving	road	swerve	swerve	pedestrians_vs_single_pedestrian	4v1
4929	male	yes	car_occupant	less than 5 years	30-39	4	car_occupant	self-driving	road	swerve	swerve	pedestrians_vs_single_pedestrian	1v1
4929	male	yes	car_occupant	less than 5 years	30-39	4	car_occupant	self-driving	sidewalk	stay	stay	pedestrians_vs_single_pedestrian	2v1
4929	male	yes	car_occupant	less than 5 years	30-39	4	car_occupant	self-driving	sidewalk	stay	swerve	pedestrians_vs_single_pedestrian	1v1
4930	male	yes	pedestrian	none	40-49	3	pedestrian_front	self-driving	sidewalk	swerve	stay	pedestrians_vs_single_pedestrian	2v1
4930	male	yes	pedestrian	none	40-49	3	pedestrian_front	self-driving	road	swerve	swerve	pedestrians_vs_single_pedestrian	1v1
4930	male	yes	pedestrian	none	40-49	3	pedestrian_front	self-driving	road	swerve	swerve	pedestrians_vs_single_pedestrian	4v1
4930	male	yes	pedestrian	none	40-49	3	pedestrian_front	self-driving	road	swerve	swerve	pedestrians_vs_single_pedestrian	2v1
4930	male	yes	pedestrian	none	40-49	3	pedestrian_front	self-driving	sidewalk	swerve	swerve	pedestrians_vs_single_pedestrian	4v1
4930	male	yes	pedestrian	none	40-49	3	pedestrian_front	self-driving	sidewalk	swerve	swerve	pedestrians_vs_single_pedestrian	3v1
4930	male	yes	pedestrian	none	40-49	3	pedestrian_front	self-driving	road	swerve	stay	pedestrians_vs_single_pedestrian	3v1
4930	male	yes	pedestrian	none	40-49	3	pedestrian_front	self-driving	sidewalk	swerve	stay	pedestrians_vs_single_pedestrian	1v1
4932	male	yes	pedestrian	less than 5 years	30-39	5	pedestrian_side	self-driving	road	swerve	swerve	pedestrians_vs_single_pedestrian	2v1
4932	male	yes	pedestrian	less than 5 years	30-39	5	pedestrian_side	self-driving	sidewalk	swerve	swerve	pedestrians_vs_single_pedestrian	2v1
4932	male	yes	pedestrian	less than 5 years	30-39	5	pedestrian_side	self-driving	sidewalk	swerve	stay	pedestrians_vs_single_pedestrian	4v1
4932	male	yes	pedestrian	less than 5 years	30-39	5	pedestrian_side	self-driving	road	swerve	stay	pedestrians_vs_single_pedestrian	3v1
4932	male	yes	pedestrian	less than 5 years	30-39	5	pedestrian_side	self-driving	road	swerve	stay	pedestrians_vs_single_pedestrian	4v1
4932	male	yes	pedestrian	less than 5 years	30-39	5	pedestrian_side	self-driving	sidewalk	swerve	swerve	pedestrians_vs_single_pedestrian	3v1
4932	male	yes	pedestrian	less than 5 years	30-39	5	pedestrian_side	self-driving	road	stay	stay	pedestrians_vs_single_pedestrian	1v1
4932	male	yes	pedestrian	less than 5 years	30-39	5	pedestrian_side	self-driving	sidewalk	stay	swerve	pedestrians_vs_single_pedestrian	1v1
4941	female	no	pedestrian	none	18-29	4	pedestrian_front	human	sidewalk	stay	swerve	pedestrians_vs_single_pedestrian	1v1
4941	female	no	pedestrian	none	18-29	4	pedestrian_front	human	road	swerve	stay	pedestrians_vs_single_pedestrian	3v1
4941	female	no	pedestrian	none	18-29	4	pedestrian_front	human	road	swerve	stay	pedestrians_vs_single_pedestrian	4v1
4941	female	no	pedestrian	none	18-29	4	pedestrian_front	human	sidewalk	swerve	stay	pedestrians_vs_single_pedestrian	3v1
4941	female	no	pedestrian	none	18-29	4	pedestrian_front	human	road	swerve	stay	pedestrians_vs_single_pedestrian	2v1
4941	female	no	pedestrian	none	18-29	4	pedestrian_front	human	road	stay	swerve	pedestrians_vs_single_pedestrian	1v1
4941	female	no	pedestrian	none	18-29	4	pedestrian_front	human	sidewalk	swerve	swerve	pedestrians_vs_single_pedestrian	4v1
4941	female	no	pedestrian	none	18-29	4	pedestrian_front	human	sidewalk	stay	swerve	pedestrians_vs_single_pedestrian	2v1
4948	female	no	car_occupant	none	18-29	3	pedestrian_side	human	sidewalk	swerve	stay	pedestrians_vs_single_pedestrian	2v1
4948	female	no	car_occupant	none	18-29	3	pedestrian_side	human	road	swerve	swerve	pedestrians_vs_single_pedestrian	3v1
4948	female	no	car_occupant	none	18-29	3	pedestrian_side	human	sidewalk	swerve	swerve	pedestrians_vs_single_pedestrian	1v1
4948	female	no	car_occupant	none	18-29	3	pedestrian_side	human	sidewalk	swerve	swerve	pedestrians_vs_single_pedestrian	4v1
4948	female	no	car_occupant	none	18-29	3	pedestrian_side	human	road	swerve	stay	pedestrians_vs_single_pedestrian	1v1
4948	female	no	car_occupant	none	18-29	3	pedestrian_side	human	sidewalk	swerve	swerve	pedestrians_vs_single_pedestrian	3v1
4948	female	no	car_occupant	none	18-29	3	pedestrian_side	human	road	swerve	stay	pedestrians_vs_single_pedestrian	2v1
4948	female	no	car_occupant	none	18-29	3	pedestrian_side	human	road	swerve	stay	pedestrians_vs_single_pedestrian	4v1
4951	female	yes	pedestrian	none	30-39	2	observer	self-driving	sidewalk	stay	stay	pedestrians_vs_single_pedestrian	1v1
4951	female	yes	pedestrian	none	30-39	2	observer	self-driving	sidewalk	swerve	stay	pedestrians_vs_single_pedestrian	2v1
4951	female	yes	pedestrian	none	30-39	2	observer	self-driving	sidewalk	swerve	swerve	pedestrians_vs_single_pedestrian	4v1
4951	female	yes	pedestrian	none	30-39	2	observer	self-driving	road	swerve	stay	pedestrians_vs_single_pedestrian	4v1
4951	female	yes	pedestrian	none	30-39	2	observer	self-driving	road	swerve	swerve	pedestrians_vs_single_pedestrian	3v1
4951	female	yes	pedestrian	none	30-39	2	observer	self-driving	road	swerve	swerve	pedestrians_vs_single_pedestrian	1v1
4951	female	yes	pedestrian	none	30-39	2	observer	self-driving	road	swerve	stay	pedestrians_vs_single_pedestrian	2v1
4951	female	yes	pedestrian	none	30-39	2	observer	self-driving	sidewalk	swerve	swerve	pedestrians_vs_single_pedestrian	3v1
4955	male	yes	car_occupant	none	18-29	3	car_occupant	self-driving	sidewalk	swerve	stay	pedestrians_vs_single_pedestrian	2v1
4955	male	yes	car_occupant	none	18-29	3	car_occupant	self-driving	sidewalk	stay	stay	pedestrians_vs_single_pedestrian	1v1
4955	male	yes	car_occupant	none	18-29	3	car_occupant	self-driving	road	swerve	swerve	pedestrians_vs_single_pedestrian	3v1
4955	male	yes	car_occupant	none	18-29	3	car_occupant	self-driving	road	swerve	stay	pedestrians_vs_single_pedestrian	2v1
4955	male	yes	car_occupant	none	18-29	3	car_occupant	self-driving	sidewalk	swerve	swerve	pedestrians_vs_single_pedestrian	3v1
4955	male	yes	car_occupant	none	18-29	3	car_occupant	self-driving	sidewalk	swerve	stay	pedestrians_vs_single_pedestrian	4v1
4955	male	yes	car_occupant	none	18-29	3	car_occupant	self-driving	road	swerve	swerve	pedestrians_vs_single_pedestrian	4v1
4955	male	yes	car_occupant	none	18-29	3	car_occupant	self-driving	road	swerve	stay	pedestrians_vs_single_pedestrian	1v1
4958	female	yes	car_occupant	none	18-29	2	observer	human	sidewalk	stay	stay	pedestrians_vs_single_pedestrian	1v1
4958	female	yes	car_occupant	none	18-29	2	observer	human	road	swerve	swerve	pedestrians_vs_single_pedestrian	3v1
4958	female	yes	car_occupant	none	18-29	2	observer	human	road	swerve	stay	pedestrians_vs_single_pedestrian	2v1
4958	female	yes	car_occupant	none	18-29	2	observer	human	sidewalk	stay	swerve	pedestrians_vs_single_pedestrian	3v1
4958	female	yes	car_occupant	none	18-29	2	observer	human	sidewalk	stay	stay	pedestrians_vs_single_pedestrian	2v1
4958	female	yes	car_occupant	none	18-29	2	observer	human	road	swerve	stay	pedestrians_vs_single_pedestrian	4v1
4958	female	yes	car_occupant	none	18-29	2	observer	human	road	stay	swerve	pedestrians_vs_single_pedestrian	1v1
4958	female	yes	car_occupant	none	18-29	2	observer	human	sidewalk	swerve	stay	pedestrians_vs_single_pedestrian	4v1
4959	female	yes	car_occupant	none	30-39	3	car_occupant	human	sidewalk	swerve	stay	pedestrians_vs_single_pedestrian	3v1
4959	female	yes	car_occupant	none	30-39	3	car_occupant	human	road	swerve	swerve	pedestrians_vs_single_pedestrian	4v1
4959	female	yes	car_occupant	none	30-39	3	car_occupant	human	road	swerve	stay	pedestrians_vs_single_pedestrian	3v1
4959	female	yes	car_occupant	none	30-39	3	car_occupant	human	sidewalk	swerve	stay	pedestrians_vs_single_pedestrian	2v1
4959	female	yes	car_occupant	none	30-39	3	car_occupant	human	road	swerve	stay	pedestrians_vs_single_pedestrian	1v1
4959	female	yes	car_occupant	none	30-39	3	car_occupant	human	sidewalk	swerve	swerve	pedestrians_vs_single_pedestrian	1v1
4959	female	yes	car_occupant	none	30-39	3	car_occupant	human	sidewalk	swerve	stay	pedestrians_vs_single_pedestrian	4v1
4959	female	yes	car_occupant	none	30-39	3	car_occupant	human	road	swerve	swerve	pedestrians_vs_single_pedestrian	2v1
4967	female	yes	pedestrian	none	18-29	3	pedestrian_front	human	road	swerve	stay	pedestrians_vs_single_pedestrian	4v1
4967	female	yes	pedestrian	none	18-29	3	pedestrian_front	human	road	stay	swerve	pedestrians_vs_single_pedestrian	2v1
4967	female	yes	pedestrian	none	18-29	3	pedestrian_front	human	road	stay	stay	pedestrians_vs_single_pedestrian	1v1
4967	female	yes	pedestrian	none	18-29	3	pedestrian_front	human	sidewalk	swerve	stay	pedestrians_vs_single_pedestrian	3v1
4967	female	yes	pedestrian	none	18-29	3	pedestrian_front	human	road	swerve	swerve	pedestrians_vs_single_pedestrian	3v1
4967	female	yes	pedestrian	none	18-29	3	pedestrian_front	human	sidewalk	stay	swerve	pedestrians_vs_single_pedestrian	1v1
4967	female	yes	pedestrian	none	18-29	3	pedestrian_front	human	sidewalk	swerve	stay	pedestrians_vs_single_pedestrian	2v1
4967	female	yes	pedestrian	none	18-29	3	pedestrian_front	human	sidewalk	swerve	stay	pedestrians_vs_single_pedestrian	4v1
4975	female	yes	pedestrian	less than 5 years	18-29	4	pedestrian_side	human	road	stay	stay	pedestrians_vs_single_pedestrian	3v1
4975	female	yes	pedestrian	less than 5 years	18-29	4	pedestrian_side	human	road	stay	swerve	pedestrians_vs_single_pedestrian	1v1
4975	female	yes	pedestrian	less than 5 years	18-29	4	pedestrian_side	human	road	swerve	swerve	pedestrians_vs_single_pedestrian	2v1
4975	female	yes	pedestrian	less than 5 years	18-29	4	pedestrian_side	human	sidewalk	stay	swerve	pedestrians_vs_single_pedestrian	1v1
4975	female	yes	pedestrian	less than 5 years	18-29	4	pedestrian_side	human	sidewalk	swerve	stay	pedestrians_vs_single_pedestrian	3v1
4975	female	yes	pedestrian	less than 5 years	18-29	4	pedestrian_side	human	road	swerve	stay	pedestrians_vs_single_pedestrian	4v1
4975	female	yes	pedestrian	less than 5 years	18-29	4	pedestrian_side	human	sidewalk	stay	swerve	pedestrians_vs_single_pedestrian	4v1
4975	female	yes	pedestrian	less than 5 years	18-29	4	pedestrian_side	human	sidewalk	swerve	stay	pedestrians_vs_single_pedestrian	2v1
4979	male	yes	pedestrian	more than 10 years	18-29	2	pedestrian_side	self-driving	road	swerve	stay	pedestrians_vs_single_pedestrian	2v1
4979	male	yes	pedestrian	more than 10 years	18-29	2	pedestrian_side	self-driving	sidewalk	swerve	swerve	pedestrians_vs_single_pedestrian	1v1
4979	male	yes	pedestrian	more than 10 years	18-29	2	pedestrian_side	self-driving	road	swerve	swerve	pedestrians_vs_single_pedestrian	4v1
4979	male	yes	pedestrian	more than 10 years	18-29	2	pedestrian_side	self-driving	sidewalk	swerve	swerve	pedestrians_vs_single_pedestrian	2v1
4979	male	yes	pedestrian	more than 10 years	18-29	2	pedestrian_side	self-driving	road	swerve	stay	pedestrians_vs_single_pedestrian	1v1
4979	male	yes	pedestrian	more than 10 years	18-29	2	pedestrian_side	self-driving	road	swerve	stay	pedestrians_vs_single_pedestrian	3v1
4979	male	yes	pedestrian	more than 10 years	18-29	2	pedestrian_side	self-driving	sidewalk	swerve	swerve	pedestrians_vs_single_pedestrian	3v1
4979	male	yes	pedestrian	more than 10 years	18-29	2	pedestrian_side	self-driving	sidewalk	swerve	stay	pedestrians_vs_single_pedestrian	4v1
4983	female	yes	pedestrian	none	18-29	3	pedestrian_side	self-driving	sidewalk	swerve	stay	pedestrians_vs_single_pedestrian	2v1
4983	female	yes	pedestrian	none	18-29	3	pedestrian_side	self-driving	sidewalk	swerve	stay	pedestrians_vs_single_pedestrian	4v1
4983	female	yes	pedestrian	none	18-29	3	pedestrian_side	self-driving	sidewalk	stay	stay	pedestrians_vs_single_pedestrian	1v1
4983	female	yes	pedestrian	none	18-29	3	pedestrian_side	self-driving	sidewalk	swerve	swerve	pedestrians_vs_single_pedestrian	3v1
4983	female	yes	pedestrian	none	18-29	3	pedestrian_side	self-driving	road	swerve	swerve	pedestrians_vs_single_pedestrian	2v1
4983	female	yes	pedestrian	none	18-29	3	pedestrian_side	self-driving	road	swerve	swerve	pedestrians_vs_single_pedestrian	4v1
4983	female	yes	pedestrian	none	18-29	3	pedestrian_side	self-driving	road	stay	swerve	pedestrians_vs_single_pedestrian	1v1
4983	female	yes	pedestrian	none	18-29	3	pedestrian_side	self-driving	road	swerve	stay	pedestrians_vs_single_pedestrian	3v1
5007	male	yes	car_occupant	less than 5 years	18-29	1	observer	self-driving	road	swerve	stay	pedestrians_vs_single_pedestrian	1v1
5007	male	yes	car_occupant	less than 5 years	18-29	1	observer	self-driving	sidewalk	stay	stay	pedestrians_vs_single_pedestrian	1v1
5007	male	yes	car_occupant	less than 5 years	18-29	1	observer	self-driving	sidewalk	swerve	stay	pedestrians_vs_single_pedestrian	4v1
5007	male	yes	car_occupant	less than 5 years	18-29	1	observer	self-driving	sidewalk	swerve	swerve	pedestrians_vs_single_pedestrian	2v1
5007	male	yes	car_occupant	less than 5 years	18-29	1	observer	self-driving	sidewalk	swerve	swerve	pedestrians_vs_single_pedestrian	3v1
5007	male	yes	car_occupant	less than 5 years	18-29	1	observer	self-driving	road	swerve	swerve	pedestrians_vs_single_pedestrian	4v1
5007	male	yes	car_occupant	less than 5 years	18-29	1	observer	self-driving	road	swerve	swerve	pedestrians_vs_single_pedestrian	3v1
5007	male	yes	car_occupant	less than 5 years	18-29	1	observer	self-driving	road	swerve	stay	pedestrians_vs_single_pedestrian	2v1
5032	male	yes	pedestrian	more than 10 years	50-59	3	pedestrian_front	human	road	swerve	stay	pedestrians_vs_single_pedestrian	4v1
5032	male	yes	pedestrian	more than 10 years	50-59	3	pedestrian_front	human	sidewalk	swerve	swerve	pedestrians_vs_single_pedestrian	1v1
5032	male	yes	pedestrian	more than 10 years	50-59	3	pedestrian_front	human	sidewalk	swerve	swerve	pedestrians_vs_single_pedestrian	2v1
5032	male	yes	pedestrian	more than 10 years	50-59	3	pedestrian_front	human	road	swerve	stay	pedestrians_vs_single_pedestrian	2v1
5032	male	yes	pedestrian	more than 10 years	50-59	3	pedestrian_front	human	sidewalk	swerve	stay	pedestrians_vs_single_pedestrian	4v1
5032	male	yes	pedestrian	more than 10 years	50-59	3	pedestrian_front	human	road	swerve	stay	pedestrians_vs_single_pedestrian	1v1
5032	male	yes	pedestrian	more than 10 years	50-59	3	pedestrian_front	human	road	swerve	swerve	pedestrians_vs_single_pedestrian	3v1
5032	male	yes	pedestrian	more than 10 years	50-59	3	pedestrian_front	human	sidewalk	swerve	stay	pedestrians_vs_single_pedestrian	3v1
5067	female	no	car_occupant	none	18-29	1	car_occupant	human	road	stay	stay	pedestrians_vs_single_pedestrian	4v1
5067	female	no	car_occupant	none	18-29	1	car_occupant	human	road	stay	stay	pedestrians_vs_single_pedestrian	2v1
5067	female	no	car_occupant	none	18-29	1	car_occupant	human	road	stay	stay	pedestrians_vs_single_pedestrian	1v1
5067	female	no	car_occupant	none	18-29	1	car_occupant	human	sidewalk	stay	swerve	pedestrians_vs_single_pedestrian	1v1
5067	female	no	car_occupant	none	18-29	1	car_occupant	human	road	swerve	swerve	pedestrians_vs_single_pedestrian	3v1
5067	female	no	car_occupant	none	18-29	1	car_occupant	human	sidewalk	stay	stay	pedestrians_vs_single_pedestrian	2v1
5067	female	no	car_occupant	none	18-29	1	car_occupant	human	sidewalk	stay	swerve	pedestrians_vs_single_pedestrian	4v1
5067	female	no	car_occupant	none	18-29	1	car_occupant	human	sidewalk	stay	stay	pedestrians_vs_single_pedestrian	3v1
5083	male	yes	pedestrian	none	18-29	5	observer	human	sidewalk	stay	stay	pedestrians_vs_single_pedestrian	1v1
5083	male	yes	pedestrian	none	18-29	5	observer	human	sidewalk	stay	stay	pedestrians_vs_single_pedestrian	2v1
5083	male	yes	pedestrian	none	18-29	5	observer	human	road	stay	swerve	pedestrians_vs_single_pedestrian	3v1
5083	male	yes	pedestrian	none	18-29	5	observer	human	road	stay	swerve	pedestrians_vs_single_pedestrian	4v1
5083	male	yes	pedestrian	none	18-29	5	observer	human	road	stay	swerve	pedestrians_vs_single_pedestrian	1v1
5083	male	yes	pedestrian	none	18-29	5	observer	human	sidewalk	stay	swerve	pedestrians_vs_single_pedestrian	3v1
5083	male	yes	pedestrian	none	18-29	5	observer	human	road	stay	stay	pedestrians_vs_single_pedestrian	2v1
5083	male	yes	pedestrian	none	18-29	5	observer	human	sidewalk	stay	stay	pedestrians_vs_single_pedestrian	4v1
5110	female	yes	pedestrian	none	18-29	2	pedestrian_side	human	sidewalk	swerve	swerve	pedestrians_vs_single_pedestrian	3v1
5110	female	yes	pedestrian	none	18-29	2	pedestrian_side	human	road	swerve	swerve	pedestrians_vs_single_pedestrian	4v1
5110	female	yes	pedestrian	none	18-29	2	pedestrian_side	human	road	swerve	swerve	pedestrians_vs_single_pedestrian	2v1
5110	female	yes	pedestrian	none	18-29	2	pedestrian_side	human	sidewalk	swerve	stay	pedestrians_vs_single_pedestrian	4v1
5110	female	yes	pedestrian	none	18-29	2	pedestrian_side	human	road	swerve	stay	pedestrians_vs_single_pedestrian	1v1
5110	female	yes	pedestrian	none	18-29	2	pedestrian_side	human	sidewalk	swerve	swerve	pedestrians_vs_single_pedestrian	1v1
5110	female	yes	pedestrian	none	18-29	2	pedestrian_side	human	sidewalk	swerve	stay	pedestrians_vs_single_pedestrian	2v1
5110	female	yes	pedestrian	none	18-29	2	pedestrian_side	human	road	swerve	stay	pedestrians_vs_single_pedestrian	3v1
5114	male	no	car_occupant	none	18-29	3	pedestrian_front	self-driving	sidewalk	stay	swerve	pedestrians_vs_single_pedestrian	3v1
5114	male	no	car_occupant	none	18-29	3	pedestrian_front	self-driving	road	swerve	swerve	pedestrians_vs_single_pedestrian	3v1
5114	male	no	car_occupant	none	18-29	3	pedestrian_front	self-driving	sidewalk	stay	stay	pedestrians_vs_single_pedestrian	1v1
5114	male	no	car_occupant	none	18-29	3	pedestrian_front	self-driving	road	swerve	swerve	pedestrians_vs_single_pedestrian	2v1
5114	male	no	car_occupant	none	18-29	3	pedestrian_front	self-driving	sidewalk	stay	stay	pedestrians_vs_single_pedestrian	2v1
5114	male	no	car_occupant	none	18-29	3	pedestrian_front	self-driving	road	swerve	swerve	pedestrians_vs_single_pedestrian	4v1
5114	male	no	car_occupant	none	18-29	3	pedestrian_front	self-driving	sidewalk	swerve	stay	pedestrians_vs_single_pedestrian	4v1
5114	male	no	car_occupant	none	18-29	3	pedestrian_front	self-driving	road	stay	swerve	pedestrians_vs_single_pedestrian	1v1
5139	male	yes	pedestrian	more than 10 years	30-39	1	car_occupant	self-driving	sidewalk	swerve	swerve	pedestrians_vs_single_pedestrian	4v1
5139	male	yes	pedestrian	more than 10 years	30-39	1	car_occupant	self-driving	sidewalk	stay	stay	pedestrians_vs_single_pedestrian	1v1
5139	male	yes	pedestrian	more than 10 years	30-39	1	car_occupant	self-driving	sidewalk	swerve	swerve	pedestrians_vs_single_pedestrian	3v1
5139	male	yes	pedestrian	more than 10 years	30-39	1	car_occupant	self-driving	road	swerve	stay	pedestrians_vs_single_pedestrian	4v1
5139	male	yes	pedestrian	more than 10 years	30-39	1	car_occupant	self-driving	road	swerve	stay	pedestrians_vs_single_pedestrian	3v1
5139	male	yes	pedestrian	more than 10 years	30-39	1	car_occupant	self-driving	road	swerve	stay	pedestrians_vs_single_pedestrian	2v1
5139	male	yes	pedestrian	more than 10 years	30-39	1	car_occupant	self-driving	road	stay	stay	pedestrians_vs_single_pedestrian	1v1
5139	male	yes	pedestrian	more than 10 years	30-39	1	car_occupant	self-driving	sidewalk	stay	swerve	pedestrians_vs_single_pedestrian	2v1
5143	male	yes	car_occupant	none	18-29	4	car_occupant	human	road	stay	swerve	pedestrians_vs_single_pedestrian	1v1
5143	male	yes	car_occupant	none	18-29	4	car_occupant	human	sidewalk	swerve	swerve	pedestrians_vs_single_pedestrian	3v1
5143	male	yes	car_occupant	none	18-29	4	car_occupant	human	sidewalk	swerve	stay	pedestrians_vs_single_pedestrian	2v1
5143	male	yes	car_occupant	none	18-29	4	car_occupant	human	road	swerve	swerve	pedestrians_vs_single_pedestrian	3v1
5143	male	yes	car_occupant	none	18-29	4	car_occupant	human	sidewalk	swerve	stay	pedestrians_vs_single_pedestrian	4v1
5143	male	yes	car_occupant	none	18-29	4	car_occupant	human	road	swerve	swerve	pedestrians_vs_single_pedestrian	4v1
5143	male	yes	car_occupant	none	18-29	4	car_occupant	human	sidewalk	stay	stay	pedestrians_vs_single_pedestrian	1v1
5143	male	yes	car_occupant	none	18-29	4	car_occupant	human	road	swerve	stay	pedestrians_vs_single_pedestrian	2v1
5156	male	yes	car_occupant	less than 5 years	18-29	1	observer	self-driving	road	swerve	stay	pedestrians_vs_single_pedestrian	3v1
5156	male	yes	car_occupant	less than 5 years	18-29	1	observer	self-driving	road	swerve	swerve	pedestrians_vs_single_pedestrian	2v1
5156	male	yes	car_occupant	less than 5 years	18-29	1	observer	self-driving	sidewalk	swerve	stay	pedestrians_vs_single_pedestrian	1v1
5156	male	yes	car_occupant	less than 5 years	18-29	1	observer	self-driving	sidewalk	swerve	swerve	pedestrians_vs_single_pedestrian	4v1
5156	male	yes	car_occupant	less than 5 years	18-29	1	observer	self-driving	road	swerve	stay	pedestrians_vs_single_pedestrian	4v1
5156	male	yes	car_occupant	less than 5 years	18-29	1	observer	self-driving	sidewalk	swerve	stay	pedestrians_vs_single_pedestrian	2v1
5156	male	yes	car_occupant	less than 5 years	18-29	1	observer	self-driving	road	stay	stay	pedestrians_vs_single_pedestrian	1v1
5156	male	yes	car_occupant	less than 5 years	18-29	1	observer	self-driving	sidewalk	swerve	swerve	pedestrians_vs_single_pedestrian	3v1
5159	female	yes	car_occupant	none	18-29	3	observer	human	road	swerve	stay	pedestrians_vs_single_pedestrian	3v1
5159	female	yes	car_occupant	none	18-29	3	observer	human	sidewalk	swerve	swerve	pedestrians_vs_single_pedestrian	4v1
5159	female	yes	car_occupant	none	18-29	3	observer	human	road	stay	stay	pedestrians_vs_single_pedestrian	1v1
5159	female	yes	car_occupant	none	18-29	3	observer	human	road	swerve	stay	pedestrians_vs_single_pedestrian	4v1
5159	female	yes	car_occupant	none	18-29	3	observer	human	road	stay	swerve	pedestrians_vs_single_pedestrian	2v1
5159	female	yes	car_occupant	none	18-29	3	observer	human	sidewalk	swerve	swerve	pedestrians_vs_single_pedestrian	2v1
5159	female	yes	car_occupant	none	18-29	3	observer	human	sidewalk	swerve	stay	pedestrians_vs_single_pedestrian	3v1
5159	female	yes	car_occupant	none	18-29	3	observer	human	sidewalk	swerve	swerve	pedestrians_vs_single_pedestrian	1v1
5173	male	yes	pedestrian	NA	30-39	5	car_occupant	self-driving	road	swerve	swerve	pedestrians_vs_single_pedestrian	2v1
5173	male	yes	pedestrian	NA	30-39	5	car_occupant	self-driving	sidewalk	swerve	stay	pedestrians_vs_single_pedestrian	3v1
5173	male	yes	pedestrian	NA	30-39	5	car_occupant	self-driving	sidewalk	stay	swerve	pedestrians_vs_single_pedestrian	2v1
5173	male	yes	pedestrian	NA	30-39	5	car_occupant	self-driving	sidewalk	swerve	stay	pedestrians_vs_single_pedestrian	4v1
5173	male	yes	pedestrian	NA	30-39	5	car_occupant	self-driving	road	stay	stay	pedestrians_vs_single_pedestrian	1v1
5173	male	yes	pedestrian	NA	30-39	5	car_occupant	self-driving	road	swerve	swerve	pedestrians_vs_single_pedestrian	3v1
5173	male	yes	pedestrian	NA	30-39	5	car_occupant	self-driving	sidewalk	stay	stay	pedestrians_vs_single_pedestrian	1v1
5173	male	yes	pedestrian	NA	30-39	5	car_occupant	self-driving	road	swerve	swerve	pedestrians_vs_single_pedestrian	4v1
5179	female	no	pedestrian	more than 10 years	30-39	3	car_occupant	self-driving	sidewalk	swerve	stay	pedestrians_vs_single_pedestrian	2v1
5179	female	no	pedestrian	more than 10 years	30-39	3	car_occupant	self-driving	road	swerve	stay	pedestrians_vs_single_pedestrian	1v1
5179	female	no	pedestrian	more than 10 years	30-39	3	car_occupant	self-driving	road	swerve	stay	pedestrians_vs_single_pedestrian	4v1
5179	female	no	pedestrian	more than 10 years	30-39	3	car_occupant	self-driving	sidewalk	swerve	swerve	pedestrians_vs_single_pedestrian	4v1
5179	female	no	pedestrian	more than 10 years	30-39	3	car_occupant	self-driving	sidewalk	swerve	swerve	pedestrians_vs_single_pedestrian	3v1
5179	female	no	pedestrian	more than 10 years	30-39	3	car_occupant	self-driving	sidewalk	stay	stay	pedestrians_vs_single_pedestrian	1v1
5179	female	no	pedestrian	more than 10 years	30-39	3	car_occupant	self-driving	road	swerve	swerve	pedestrians_vs_single_pedestrian	3v1
5179	female	no	pedestrian	more than 10 years	30-39	3	car_occupant	self-driving	road	swerve	swerve	pedestrians_vs_single_pedestrian	2v1
5217	female	yes	pedestrian	more than 10 years	30-39	1	observer	self-driving	road	swerve	stay	pedestrians_vs_single_pedestrian	2v1
5217	female	yes	pedestrian	more than 10 years	30-39	1	observer	self-driving	road	swerve	stay	pedestrians_vs_single_pedestrian	4v1
5217	female	yes	pedestrian	more than 10 years	30-39	1	observer	self-driving	sidewalk	stay	swerve	pedestrians_vs_single_pedestrian	1v1
5217	female	yes	pedestrian	more than 10 years	30-39	1	observer	self-driving	road	stay	swerve	pedestrians_vs_single_pedestrian	1v1
5217	female	yes	pedestrian	more than 10 years	30-39	1	observer	self-driving	sidewalk	stay	stay	pedestrians_vs_single_pedestrian	2v1
5217	female	yes	pedestrian	more than 10 years	30-39	1	observer	self-driving	road	swerve	stay	pedestrians_vs_single_pedestrian	3v1
5217	female	yes	pedestrian	more than 10 years	30-39	1	observer	self-driving	sidewalk	stay	swerve	pedestrians_vs_single_pedestrian	4v1
5217	female	yes	pedestrian	more than 10 years	30-39	1	observer	self-driving	sidewalk	stay	swerve	pedestrians_vs_single_pedestrian	3v1
5218	male	yes	pedestrian	more than 10 years	30-39	3	pedestrian_side	self-driving	road	stay	swerve	pedestrians_vs_single_pedestrian	3v1
5218	male	yes	pedestrian	more than 10 years	30-39	3	pedestrian_side	self-driving	sidewalk	swerve	stay	pedestrians_vs_single_pedestrian	4v1
5218	male	yes	pedestrian	more than 10 years	30-39	3	pedestrian_side	self-driving	sidewalk	stay	stay	pedestrians_vs_single_pedestrian	1v1
5218	male	yes	pedestrian	more than 10 years	30-39	3	pedestrian_side	self-driving	road	swerve	swerve	pedestrians_vs_single_pedestrian	2v1
5218	male	yes	pedestrian	more than 10 years	30-39	3	pedestrian_side	self-driving	sidewalk	swerve	stay	pedestrians_vs_single_pedestrian	3v1
5218	male	yes	pedestrian	more than 10 years	30-39	3	pedestrian_side	self-driving	road	stay	swerve	pedestrians_vs_single_pedestrian	1v1
5218	male	yes	pedestrian	more than 10 years	30-39	3	pedestrian_side	self-driving	road	swerve	stay	pedestrians_vs_single_pedestrian	4v1
5218	male	yes	pedestrian	more than 10 years	30-39	3	pedestrian_side	self-driving	sidewalk	swerve	swerve	pedestrians_vs_single_pedestrian	2v1
5275	female	yes	pedestrian	none	18-29	3	observer	human	sidewalk	stay	swerve	pedestrians_vs_single_pedestrian	4v1
5275	female	yes	pedestrian	none	18-29	3	observer	human	road	swerve	stay	pedestrians_vs_single_pedestrian	3v1
5275	female	yes	pedestrian	none	18-29	3	observer	human	sidewalk	stay	swerve	pedestrians_vs_single_pedestrian	3v1
5275	female	yes	pedestrian	none	18-29	3	observer	human	road	stay	swerve	pedestrians_vs_single_pedestrian	1v1
5275	female	yes	pedestrian	none	18-29	3	observer	human	sidewalk	stay	stay	pedestrians_vs_single_pedestrian	1v1
5275	female	yes	pedestrian	none	18-29	3	observer	human	sidewalk	stay	stay	pedestrians_vs_single_pedestrian	2v1
5275	female	yes	pedestrian	none	18-29	3	observer	human	road	stay	stay	pedestrians_vs_single_pedestrian	2v1
5275	female	yes	pedestrian	none	18-29	3	observer	human	road	stay	stay	pedestrians_vs_single_pedestrian	4v1
5298	male	yes	car_occupant	6 to 10 years	18-29	5	car_occupant	human	sidewalk	swerve	stay	pedestrians_vs_single_pedestrian	3v1
5298	male	yes	car_occupant	6 to 10 years	18-29	5	car_occupant	human	sidewalk	swerve	swerve	pedestrians_vs_single_pedestrian	4v1
5298	male	yes	car_occupant	6 to 10 years	18-29	5	car_occupant	human	road	swerve	swerve	pedestrians_vs_single_pedestrian	4v1
5298	male	yes	car_occupant	6 to 10 years	18-29	5	car_occupant	human	sidewalk	swerve	stay	pedestrians_vs_single_pedestrian	2v1
5298	male	yes	car_occupant	6 to 10 years	18-29	5	car_occupant	human	sidewalk	swerve	swerve	pedestrians_vs_single_pedestrian	1v1
5298	male	yes	car_occupant	6 to 10 years	18-29	5	car_occupant	human	road	swerve	stay	pedestrians_vs_single_pedestrian	2v1
5298	male	yes	car_occupant	6 to 10 years	18-29	5	car_occupant	human	road	swerve	stay	pedestrians_vs_single_pedestrian	3v1
5298	male	yes	car_occupant	6 to 10 years	18-29	5	car_occupant	human	road	swerve	swerve	pedestrians_vs_single_pedestrian	1v1
5299	female	yes	car_occupant	more than 10 years	60-69	3	car_occupant	self-driving	road	swerve	stay	pedestrians_vs_single_pedestrian	2v1
5299	female	yes	car_occupant	more than 10 years	60-69	3	car_occupant	self-driving	road	swerve	swerve	pedestrians_vs_single_pedestrian	4v1
5299	female	yes	car_occupant	more than 10 years	60-69	3	car_occupant	self-driving	road	swerve	swerve	pedestrians_vs_single_pedestrian	3v1
5299	female	yes	car_occupant	more than 10 years	60-69	3	car_occupant	self-driving	sidewalk	swerve	stay	pedestrians_vs_single_pedestrian	3v1
5299	female	yes	car_occupant	more than 10 years	60-69	3	car_occupant	self-driving	sidewalk	stay	stay	pedestrians_vs_single_pedestrian	1v1
5299	female	yes	car_occupant	more than 10 years	60-69	3	car_occupant	self-driving	sidewalk	swerve	swerve	pedestrians_vs_single_pedestrian	4v1
5299	female	yes	car_occupant	more than 10 years	60-69	3	car_occupant	self-driving	road	swerve	swerve	pedestrians_vs_single_pedestrian	1v1
5299	female	yes	car_occupant	more than 10 years	60-69	3	car_occupant	self-driving	sidewalk	swerve	swerve	pedestrians_vs_single_pedestrian	2v1
5300	female	yes	car_occupant	more than 10 years	50-59	3	pedestrian_front	human	sidewalk	swerve	swerve	pedestrians_vs_single_pedestrian	2v1
5300	female	yes	car_occupant	more than 10 years	50-59	3	pedestrian_front	human	sidewalk	swerve	swerve	pedestrians_vs_single_pedestrian	3v1
5300	female	yes	car_occupant	more than 10 years	50-59	3	pedestrian_front	human	road	swerve	swerve	pedestrians_vs_single_pedestrian	3v1
5300	female	yes	car_occupant	more than 10 years	50-59	3	pedestrian_front	human	sidewalk	swerve	stay	pedestrians_vs_single_pedestrian	1v1
5300	female	yes	car_occupant	more than 10 years	50-59	3	pedestrian_front	human	sidewalk	swerve	stay	pedestrians_vs_single_pedestrian	4v1
5300	female	yes	car_occupant	more than 10 years	50-59	3	pedestrian_front	human	road	swerve	swerve	pedestrians_vs_single_pedestrian	4v1
5300	female	yes	car_occupant	more than 10 years	50-59	3	pedestrian_front	human	road	swerve	stay	pedestrians_vs_single_pedestrian	2v1
5300	female	yes	car_occupant	more than 10 years	50-59	3	pedestrian_front	human	road	swerve	stay	pedestrians_vs_single_pedestrian	1v1
5301	male	yes	pedestrian	more than 10 years	60-69	1	pedestrian_front	self-driving	sidewalk	swerve	stay	pedestrians_vs_single_pedestrian	2v1
5301	male	yes	pedestrian	more than 10 years	60-69	1	pedestrian_front	self-driving	sidewalk	swerve	swerve	pedestrians_vs_single_pedestrian	1v1
5301	male	yes	pedestrian	more than 10 years	60-69	1	pedestrian_front	self-driving	road	swerve	swerve	pedestrians_vs_single_pedestrian	3v1
5301	male	yes	pedestrian	more than 10 years	60-69	1	pedestrian_front	self-driving	road	swerve	swerve	pedestrians_vs_single_pedestrian	2v1
5301	male	yes	pedestrian	more than 10 years	60-69	1	pedestrian_front	self-driving	sidewalk	swerve	swerve	pedestrians_vs_single_pedestrian	4v1
5301	male	yes	pedestrian	more than 10 years	60-69	1	pedestrian_front	self-driving	road	swerve	stay	pedestrians_vs_single_pedestrian	1v1
5301	male	yes	pedestrian	more than 10 years	60-69	1	pedestrian_front	self-driving	sidewalk	swerve	stay	pedestrians_vs_single_pedestrian	3v1
5301	male	yes	pedestrian	more than 10 years	60-69	1	pedestrian_front	self-driving	road	swerve	swerve	pedestrians_vs_single_pedestrian	4v1
5304	female	yes	pedestrian	more than 10 years	18-29	3	pedestrian_side	human	sidewalk	swerve	swerve	pedestrians_vs_single_pedestrian	4v1
5304	female	yes	pedestrian	more than 10 years	18-29	3	pedestrian_side	human	sidewalk	swerve	stay	pedestrians_vs_single_pedestrian	3v1
5304	female	yes	pedestrian	more than 10 years	18-29	3	pedestrian_side	human	road	swerve	stay	pedestrians_vs_single_pedestrian	3v1
5304	female	yes	pedestrian	more than 10 years	18-29	3	pedestrian_side	human	road	swerve	swerve	pedestrians_vs_single_pedestrian	2v1
5304	female	yes	pedestrian	more than 10 years	18-29	3	pedestrian_side	human	road	swerve	swerve	pedestrians_vs_single_pedestrian	4v1
5304	female	yes	pedestrian	more than 10 years	18-29	3	pedestrian_side	human	sidewalk	swerve	stay	pedestrians_vs_single_pedestrian	2v1
5304	female	yes	pedestrian	more than 10 years	18-29	3	pedestrian_side	human	sidewalk	swerve	stay	pedestrians_vs_single_pedestrian	1v1
5304	female	yes	pedestrian	more than 10 years	18-29	3	pedestrian_side	human	road	swerve	swerve	pedestrians_vs_single_pedestrian	1v1
5305	male	yes	pedestrian	more than 10 years	30-39	5	pedestrian_side	self-driving	sidewalk	stay	stay	pedestrians_vs_single_pedestrian	4v1
5305	male	yes	pedestrian	more than 10 years	30-39	5	pedestrian_side	self-driving	road	stay	swerve	pedestrians_vs_single_pedestrian	3v1
5305	male	yes	pedestrian	more than 10 years	30-39	5	pedestrian_side	self-driving	road	swerve	swerve	pedestrians_vs_single_pedestrian	4v1
5305	male	yes	pedestrian	more than 10 years	30-39	5	pedestrian_side	self-driving	sidewalk	stay	swerve	pedestrians_vs_single_pedestrian	2v1
5305	male	yes	pedestrian	more than 10 years	30-39	5	pedestrian_side	self-driving	sidewalk	stay	stay	pedestrians_vs_single_pedestrian	3v1
5305	male	yes	pedestrian	more than 10 years	30-39	5	pedestrian_side	self-driving	sidewalk	stay	stay	pedestrians_vs_single_pedestrian	1v1
5305	male	yes	pedestrian	more than 10 years	30-39	5	pedestrian_side	self-driving	road	stay	stay	pedestrians_vs_single_pedestrian	1v1
5305	male	yes	pedestrian	more than 10 years	30-39	5	pedestrian_side	self-driving	road	stay	swerve	pedestrians_vs_single_pedestrian	2v1
5306	female	yes	car_occupant	more than 10 years	30-39	3	observer	self-driving	road	swerve	stay	pedestrians_vs_single_pedestrian	2v1
5306	female	yes	car_occupant	more than 10 years	30-39	3	observer	self-driving	road	swerve	swerve	pedestrians_vs_single_pedestrian	1v1
5306	female	yes	car_occupant	more than 10 years	30-39	3	observer	self-driving	sidewalk	swerve	stay	pedestrians_vs_single_pedestrian	4v1
5306	female	yes	car_occupant	more than 10 years	30-39	3	observer	self-driving	road	swerve	stay	pedestrians_vs_single_pedestrian	3v1
5306	female	yes	car_occupant	more than 10 years	30-39	3	observer	self-driving	sidewalk	swerve	stay	pedestrians_vs_single_pedestrian	2v1
5306	female	yes	car_occupant	more than 10 years	30-39	3	observer	self-driving	sidewalk	swerve	stay	pedestrians_vs_single_pedestrian	3v1
5306	female	yes	car_occupant	more than 10 years	30-39	3	observer	self-driving	sidewalk	swerve	swerve	pedestrians_vs_single_pedestrian	1v1
5306	female	yes	car_occupant	more than 10 years	30-39	3	observer	self-driving	road	swerve	swerve	pedestrians_vs_single_pedestrian	4v1
5307	male	yes	pedestrian	6 to 10 years	18-29	2	observer	human	road	swerve	stay	pedestrians_vs_single_pedestrian	4v1
5307	male	yes	pedestrian	6 to 10 years	18-29	2	observer	human	road	swerve	stay	pedestrians_vs_single_pedestrian	3v1
5307	male	yes	pedestrian	6 to 10 years	18-29	2	observer	human	sidewalk	swerve	stay	pedestrians_vs_single_pedestrian	3v1
5307	male	yes	pedestrian	6 to 10 years	18-29	2	observer	human	road	swerve	stay	pedestrians_vs_single_pedestrian	1v1
5307	male	yes	pedestrian	6 to 10 years	18-29	2	observer	human	sidewalk	swerve	swerve	pedestrians_vs_single_pedestrian	4v1
5307	male	yes	pedestrian	6 to 10 years	18-29	2	observer	human	sidewalk	swerve	swerve	pedestrians_vs_single_pedestrian	2v1
5307	male	yes	pedestrian	6 to 10 years	18-29	2	observer	human	sidewalk	stay	swerve	pedestrians_vs_single_pedestrian	1v1
5307	male	yes	pedestrian	6 to 10 years	18-29	2	observer	human	road	swerve	stay	pedestrians_vs_single_pedestrian	2v1
5335	male	yes	car_occupant	more than 10 years	50-59	5	car_occupant	human	sidewalk	stay	stay	pedestrians_vs_single_pedestrian	4v1
5335	male	yes	car_occupant	more than 10 years	50-59	5	car_occupant	human	road	stay	swerve	pedestrians_vs_single_pedestrian	4v1
5335	male	yes	car_occupant	more than 10 years	50-59	5	car_occupant	human	road	stay	swerve	pedestrians_vs_single_pedestrian	1v1
5335	male	yes	car_occupant	more than 10 years	50-59	5	car_occupant	human	road	swerve	swerve	pedestrians_vs_single_pedestrian	3v1
5335	male	yes	car_occupant	more than 10 years	50-59	5	car_occupant	human	sidewalk	stay	swerve	pedestrians_vs_single_pedestrian	3v1
5335	male	yes	car_occupant	more than 10 years	50-59	5	car_occupant	human	road	swerve	stay	pedestrians_vs_single_pedestrian	2v1
5335	male	yes	car_occupant	more than 10 years	50-59	5	car_occupant	human	sidewalk	stay	swerve	pedestrians_vs_single_pedestrian	2v1
5335	male	yes	car_occupant	more than 10 years	50-59	5	car_occupant	human	sidewalk	stay	stay	pedestrians_vs_single_pedestrian	1v1
5341	female	yes	car_occupant	more than 10 years	30-39	3	car_occupant	self-driving	sidewalk	swerve	swerve	pedestrians_vs_single_pedestrian	4v1
5341	female	yes	car_occupant	more than 10 years	30-39	3	car_occupant	self-driving	road	swerve	stay	pedestrians_vs_single_pedestrian	2v1
5341	female	yes	car_occupant	more than 10 years	30-39	3	car_occupant	self-driving	road	stay	stay	pedestrians_vs_single_pedestrian	1v1
5341	female	yes	car_occupant	more than 10 years	30-39	3	car_occupant	self-driving	sidewalk	swerve	swerve	pedestrians_vs_single_pedestrian	3v1
5341	female	yes	car_occupant	more than 10 years	30-39	3	car_occupant	self-driving	sidewalk	stay	swerve	pedestrians_vs_single_pedestrian	1v1
5341	female	yes	car_occupant	more than 10 years	30-39	3	car_occupant	self-driving	road	swerve	swerve	pedestrians_vs_single_pedestrian	4v1
5341	female	yes	car_occupant	more than 10 years	30-39	3	car_occupant	self-driving	sidewalk	swerve	stay	pedestrians_vs_single_pedestrian	2v1
5341	female	yes	car_occupant	more than 10 years	30-39	3	car_occupant	self-driving	road	swerve	swerve	pedestrians_vs_single_pedestrian	3v1
5345	male	yes	car_occupant	more than 10 years	40-49	3	observer	human	road	stay	swerve	pedestrians_vs_single_pedestrian	1v1
5345	male	yes	car_occupant	more than 10 years	40-49	3	observer	human	sidewalk	stay	stay	pedestrians_vs_single_pedestrian	1v1
5345	male	yes	car_occupant	more than 10 years	40-49	3	observer	human	sidewalk	swerve	stay	pedestrians_vs_single_pedestrian	3v1
5345	male	yes	car_occupant	more than 10 years	40-49	3	observer	human	sidewalk	swerve	swerve	pedestrians_vs_single_pedestrian	2v1
5345	male	yes	car_occupant	more than 10 years	40-49	3	observer	human	sidewalk	swerve	stay	pedestrians_vs_single_pedestrian	4v1
5345	male	yes	car_occupant	more than 10 years	40-49	3	observer	human	road	swerve	swerve	pedestrians_vs_single_pedestrian	4v1
5345	male	yes	car_occupant	more than 10 years	40-49	3	observer	human	road	swerve	swerve	pedestrians_vs_single_pedestrian	2v1
5345	male	yes	car_occupant	more than 10 years	40-49	3	observer	human	road	swerve	stay	pedestrians_vs_single_pedestrian	3v1
5346	male	yes	car_occupant	more than 10 years	30-39	4	pedestrian_side	human	road	swerve	stay	pedestrians_vs_single_pedestrian	2v1
5346	male	yes	car_occupant	more than 10 years	30-39	4	pedestrian_side	human	road	swerve	swerve	pedestrians_vs_single_pedestrian	1v1
5346	male	yes	car_occupant	more than 10 years	30-39	4	pedestrian_side	human	sidewalk	swerve	stay	pedestrians_vs_single_pedestrian	2v1
5346	male	yes	car_occupant	more than 10 years	30-39	4	pedestrian_side	human	sidewalk	swerve	stay	pedestrians_vs_single_pedestrian	1v1
5346	male	yes	car_occupant	more than 10 years	30-39	4	pedestrian_side	human	sidewalk	swerve	stay	pedestrians_vs_single_pedestrian	3v1
5346	male	yes	car_occupant	more than 10 years	30-39	4	pedestrian_side	human	sidewalk	swerve	swerve	pedestrians_vs_single_pedestrian	4v1
5346	male	yes	car_occupant	more than 10 years	30-39	4	pedestrian_side	human	road	swerve	swerve	pedestrians_vs_single_pedestrian	4v1
5346	male	yes	car_occupant	more than 10 years	30-39	4	pedestrian_side	human	road	swerve	swerve	pedestrians_vs_single_pedestrian	3v1
5348	male	yes	pedestrian	more than 10 years	30-39	5	pedestrian_front	human	road	stay	stay	pedestrians_vs_single_pedestrian	1v1
5348	male	yes	pedestrian	more than 10 years	30-39	5	pedestrian_front	human	sidewalk	stay	stay	pedestrians_vs_single_pedestrian	1v1
5348	male	yes	pedestrian	more than 10 years	30-39	5	pedestrian_front	human	sidewalk	swerve	swerve	pedestrians_vs_single_pedestrian	4v1
5348	male	yes	pedestrian	more than 10 years	30-39	5	pedestrian_front	human	sidewalk	swerve	swerve	pedestrians_vs_single_pedestrian	2v1
5348	male	yes	pedestrian	more than 10 years	30-39	5	pedestrian_front	human	sidewalk	stay	stay	pedestrians_vs_single_pedestrian	3v1
5348	male	yes	pedestrian	more than 10 years	30-39	5	pedestrian_front	human	road	swerve	swerve	pedestrians_vs_single_pedestrian	4v1
5348	male	yes	pedestrian	more than 10 years	30-39	5	pedestrian_front	human	road	swerve	stay	pedestrians_vs_single_pedestrian	3v1
5348	male	yes	pedestrian	more than 10 years	30-39	5	pedestrian_front	human	road	swerve	stay	pedestrians_vs_single_pedestrian	2v1
5349	male	no	car_occupant	more than 10 years	80-89	3	car_occupant	human	sidewalk	stay	swerve	pedestrians_vs_single_pedestrian	2v1
5349	male	no	car_occupant	more than 10 years	80-89	3	car_occupant	human	sidewalk	stay	stay	pedestrians_vs_single_pedestrian	1v1
5349	male	no	car_occupant	more than 10 years	80-89	3	car_occupant	human	sidewalk	stay	swerve	pedestrians_vs_single_pedestrian	4v1
5349	male	no	car_occupant	more than 10 years	80-89	3	car_occupant	human	road	swerve	stay	pedestrians_vs_single_pedestrian	3v1
5349	male	no	car_occupant	more than 10 years	80-89	3	car_occupant	human	road	swerve	swerve	pedestrians_vs_single_pedestrian	1v1
5349	male	no	car_occupant	more than 10 years	80-89	3	car_occupant	human	sidewalk	stay	swerve	pedestrians_vs_single_pedestrian	3v1
5349	male	no	car_occupant	more than 10 years	80-89	3	car_occupant	human	road	stay	stay	pedestrians_vs_single_pedestrian	4v1
5349	male	no	car_occupant	more than 10 years	80-89	3	car_occupant	human	road	stay	swerve	pedestrians_vs_single_pedestrian	2v1
5350	male	yes	pedestrian	more than 10 years	18-29	3	observer	self-driving	road	swerve	swerve	pedestrians_vs_single_pedestrian	4v1
5350	male	yes	pedestrian	more than 10 years	18-29	3	observer	self-driving	road	swerve	swerve	pedestrians_vs_single_pedestrian	2v1
5350	male	yes	pedestrian	more than 10 years	18-29	3	observer	self-driving	sidewalk	stay	swerve	pedestrians_vs_single_pedestrian	1v1
5350	male	yes	pedestrian	more than 10 years	18-29	3	observer	self-driving	road	swerve	swerve	pedestrians_vs_single_pedestrian	3v1
5350	male	yes	pedestrian	more than 10 years	18-29	3	observer	self-driving	sidewalk	swerve	stay	pedestrians_vs_single_pedestrian	4v1
5350	male	yes	pedestrian	more than 10 years	18-29	3	observer	self-driving	sidewalk	swerve	stay	pedestrians_vs_single_pedestrian	3v1
5350	male	yes	pedestrian	more than 10 years	18-29	3	observer	self-driving	sidewalk	swerve	swerve	pedestrians_vs_single_pedestrian	2v1
5350	male	yes	pedestrian	more than 10 years	18-29	3	observer	self-driving	road	stay	stay	pedestrians_vs_single_pedestrian	1v1
5375	female	yes	pedestrian	more than 10 years	40-49	3	pedestrian_side	self-driving	sidewalk	swerve	stay	pedestrians_vs_single_pedestrian	1v1
5375	female	yes	pedestrian	more than 10 years	40-49	3	pedestrian_side	self-driving	sidewalk	swerve	swerve	pedestrians_vs_single_pedestrian	4v1
5375	female	yes	pedestrian	more than 10 years	40-49	3	pedestrian_side	self-driving	road	swerve	stay	pedestrians_vs_single_pedestrian	1v1
5375	female	yes	pedestrian	more than 10 years	40-49	3	pedestrian_side	self-driving	road	swerve	swerve	pedestrians_vs_single_pedestrian	3v1
5375	female	yes	pedestrian	more than 10 years	40-49	3	pedestrian_side	self-driving	sidewalk	swerve	stay	pedestrians_vs_single_pedestrian	2v1
5375	female	yes	pedestrian	more than 10 years	40-49	3	pedestrian_side	self-driving	sidewalk	swerve	stay	pedestrians_vs_single_pedestrian	3v1
5375	female	yes	pedestrian	more than 10 years	40-49	3	pedestrian_side	self-driving	road	swerve	swerve	pedestrians_vs_single_pedestrian	4v1
5375	female	yes	pedestrian	more than 10 years	40-49	3	pedestrian_side	self-driving	road	swerve	swerve	pedestrians_vs_single_pedestrian	2v1
5377	male	yes	pedestrian	more than 10 years	50-59	3	car_occupant	self-driving	sidewalk	swerve	stay	pedestrians_vs_single_pedestrian	3v1
5377	male	yes	pedestrian	more than 10 years	50-59	3	car_occupant	self-driving	road	swerve	stay	pedestrians_vs_single_pedestrian	4v1
5377	male	yes	pedestrian	more than 10 years	50-59	3	car_occupant	self-driving	road	swerve	stay	pedestrians_vs_single_pedestrian	1v1
5377	male	yes	pedestrian	more than 10 years	50-59	3	car_occupant	self-driving	sidewalk	swerve	swerve	pedestrians_vs_single_pedestrian	1v1
5377	male	yes	pedestrian	more than 10 years	50-59	3	car_occupant	self-driving	road	swerve	swerve	pedestrians_vs_single_pedestrian	2v1
5377	male	yes	pedestrian	more than 10 years	50-59	3	car_occupant	self-driving	sidewalk	swerve	stay	pedestrians_vs_single_pedestrian	4v1
5377	male	yes	pedestrian	more than 10 years	50-59	3	car_occupant	self-driving	road	swerve	swerve	pedestrians_vs_single_pedestrian	3v1
5377	male	yes	pedestrian	more than 10 years	50-59	3	car_occupant	self-driving	sidewalk	swerve	stay	pedestrians_vs_single_pedestrian	2v1
5378	male	yes	pedestrian	more than 10 years	30-39	5	pedestrian_front	self-driving	sidewalk	stay	stay	pedestrians_vs_single_pedestrian	1v1
5378	male	yes	pedestrian	more than 10 years	30-39	5	pedestrian_front	self-driving	road	swerve	stay	pedestrians_vs_single_pedestrian	3v1
5378	male	yes	pedestrian	more than 10 years	30-39	5	pedestrian_front	self-driving	road	swerve	swerve	pedestrians_vs_single_pedestrian	2v1
5378	male	yes	pedestrian	more than 10 years	30-39	5	pedestrian_front	self-driving	sidewalk	swerve	stay	pedestrians_vs_single_pedestrian	3v1
5378	male	yes	pedestrian	more than 10 years	30-39	5	pedestrian_front	self-driving	road	stay	stay	pedestrians_vs_single_pedestrian	1v1
5378	male	yes	pedestrian	more than 10 years	30-39	5	pedestrian_front	self-driving	road	swerve	swerve	pedestrians_vs_single_pedestrian	4v1
5378	male	yes	pedestrian	more than 10 years	30-39	5	pedestrian_front	self-driving	sidewalk	swerve	swerve	pedestrians_vs_single_pedestrian	2v1
5378	male	yes	pedestrian	more than 10 years	30-39	5	pedestrian_front	self-driving	sidewalk	swerve	stay	pedestrians_vs_single_pedestrian	4v1
5386	male	yes	car_occupant	more than 10 years	40-49	5	car_occupant	human	road	stay	swerve	pedestrians_vs_single_pedestrian	1v1
5386	male	yes	car_occupant	more than 10 years	40-49	5	car_occupant	human	sidewalk	swerve	swerve	pedestrians_vs_single_pedestrian	2v1
5386	male	yes	car_occupant	more than 10 years	40-49	5	car_occupant	human	sidewalk	swerve	swerve	pedestrians_vs_single_pedestrian	3v1
5386	male	yes	car_occupant	more than 10 years	40-49	5	car_occupant	human	sidewalk	swerve	stay	pedestrians_vs_single_pedestrian	4v1
5386	male	yes	car_occupant	more than 10 years	40-49	5	car_occupant	human	road	swerve	stay	pedestrians_vs_single_pedestrian	3v1
5386	male	yes	car_occupant	more than 10 years	40-49	5	car_occupant	human	road	swerve	swerve	pedestrians_vs_single_pedestrian	4v1
5386	male	yes	car_occupant	more than 10 years	40-49	5	car_occupant	human	road	swerve	stay	pedestrians_vs_single_pedestrian	2v1
5386	male	yes	car_occupant	more than 10 years	40-49	5	car_occupant	human	sidewalk	stay	stay	pedestrians_vs_single_pedestrian	1v1
5400	male	yes	pedestrian	more than 10 years	50-59	3	pedestrian_front	human	sidewalk	swerve	swerve	pedestrians_vs_single_pedestrian	3v1
5400	male	yes	pedestrian	more than 10 years	50-59	3	pedestrian_front	human	road	swerve	stay	pedestrians_vs_single_pedestrian	3v1
5400	male	yes	pedestrian	more than 10 years	50-59	3	pedestrian_front	human	sidewalk	swerve	stay	pedestrians_vs_single_pedestrian	4v1
5400	male	yes	pedestrian	more than 10 years	50-59	3	pedestrian_front	human	sidewalk	stay	stay	pedestrians_vs_single_pedestrian	2v1
5400	male	yes	pedestrian	more than 10 years	50-59	3	pedestrian_front	human	road	stay	stay	pedestrians_vs_single_pedestrian	2v1
5400	male	yes	pedestrian	more than 10 years	50-59	3	pedestrian_front	human	road	swerve	swerve	pedestrians_vs_single_pedestrian	4v1
5400	male	yes	pedestrian	more than 10 years	50-59	3	pedestrian_front	human	road	stay	swerve	pedestrians_vs_single_pedestrian	1v1
5400	male	yes	pedestrian	more than 10 years	50-59	3	pedestrian_front	human	sidewalk	stay	swerve	pedestrians_vs_single_pedestrian	1v1
5401	male	yes	pedestrian	6 to 10 years	30-39	3	pedestrian_side	self-driving	sidewalk	swerve	swerve	pedestrians_vs_single_pedestrian	4v1
5401	male	yes	pedestrian	6 to 10 years	30-39	3	pedestrian_side	self-driving	sidewalk	swerve	swerve	pedestrians_vs_single_pedestrian	3v1
5401	male	yes	pedestrian	6 to 10 years	30-39	3	pedestrian_side	self-driving	sidewalk	stay	swerve	pedestrians_vs_single_pedestrian	2v1
5401	male	yes	pedestrian	6 to 10 years	30-39	3	pedestrian_side	self-driving	road	swerve	stay	pedestrians_vs_single_pedestrian	4v1
5401	male	yes	pedestrian	6 to 10 years	30-39	3	pedestrian_side	self-driving	road	swerve	stay	pedestrians_vs_single_pedestrian	2v1
5401	male	yes	pedestrian	6 to 10 years	30-39	3	pedestrian_side	self-driving	sidewalk	stay	stay	pedestrians_vs_single_pedestrian	1v1
5401	male	yes	pedestrian	6 to 10 years	30-39	3	pedestrian_side	self-driving	road	stay	stay	pedestrians_vs_single_pedestrian	1v1
5401	male	yes	pedestrian	6 to 10 years	30-39	3	pedestrian_side	self-driving	road	swerve	swerve	pedestrians_vs_single_pedestrian	3v1
5413	male	yes	car_occupant	6 to 10 years	18-29	2	observer	human	sidewalk	swerve	swerve	pedestrians_vs_single_pedestrian	2v1
5413	male	yes	car_occupant	6 to 10 years	18-29	2	observer	human	road	swerve	swerve	pedestrians_vs_single_pedestrian	4v1
5413	male	yes	car_occupant	6 to 10 years	18-29	2	observer	human	sidewalk	swerve	stay	pedestrians_vs_single_pedestrian	3v1
5413	male	yes	car_occupant	6 to 10 years	18-29	2	observer	human	road	swerve	swerve	pedestrians_vs_single_pedestrian	3v1
5413	male	yes	car_occupant	6 to 10 years	18-29	2	observer	human	sidewalk	swerve	stay	pedestrians_vs_single_pedestrian	4v1
5413	male	yes	car_occupant	6 to 10 years	18-29	2	observer	human	sidewalk	stay	stay	pedestrians_vs_single_pedestrian	1v1
5413	male	yes	car_occupant	6 to 10 years	18-29	2	observer	human	road	swerve	stay	pedestrians_vs_single_pedestrian	2v1
5413	male	yes	car_occupant	6 to 10 years	18-29	2	observer	human	road	swerve	swerve	pedestrians_vs_single_pedestrian	1v1
5414	female	yes	car_occupant	more than 10 years	18-29	1	observer	self-driving	sidewalk	stay	stay	pedestrians_vs_single_pedestrian	1v1
5414	female	yes	car_occupant	more than 10 years	18-29	1	observer	self-driving	road	swerve	swerve	pedestrians_vs_single_pedestrian	3v1
5414	female	yes	car_occupant	more than 10 years	18-29	1	observer	self-driving	road	stay	stay	pedestrians_vs_single_pedestrian	1v1
5414	female	yes	car_occupant	more than 10 years	18-29	1	observer	self-driving	sidewalk	stay	swerve	pedestrians_vs_single_pedestrian	2v1
5414	female	yes	car_occupant	more than 10 years	18-29	1	observer	self-driving	sidewalk	stay	swerve	pedestrians_vs_single_pedestrian	3v1
5414	female	yes	car_occupant	more than 10 years	18-29	1	observer	self-driving	road	stay	stay	pedestrians_vs_single_pedestrian	2v1
5414	female	yes	car_occupant	more than 10 years	18-29	1	observer	self-driving	sidewalk	stay	stay	pedestrians_vs_single_pedestrian	4v1
5414	female	yes	car_occupant	more than 10 years	18-29	1	observer	self-driving	road	swerve	swerve	pedestrians_vs_single_pedestrian	4v1
5416	male	yes	pedestrian	none	18-29	5	pedestrian_side	human	sidewalk	swerve	swerve	pedestrians_vs_single_pedestrian	4v1
5416	male	yes	pedestrian	none	18-29	5	pedestrian_side	human	road	swerve	stay	pedestrians_vs_single_pedestrian	4v1
5416	male	yes	pedestrian	none	18-29	5	pedestrian_side	human	sidewalk	swerve	stay	pedestrians_vs_single_pedestrian	1v1
5416	male	yes	pedestrian	none	18-29	5	pedestrian_side	human	sidewalk	swerve	stay	pedestrians_vs_single_pedestrian	2v1
5416	male	yes	pedestrian	none	18-29	5	pedestrian_side	human	road	swerve	swerve	pedestrians_vs_single_pedestrian	1v1
5416	male	yes	pedestrian	none	18-29	5	pedestrian_side	human	road	swerve	swerve	pedestrians_vs_single_pedestrian	3v1
5416	male	yes	pedestrian	none	18-29	5	pedestrian_side	human	road	swerve	stay	pedestrians_vs_single_pedestrian	2v1
5416	male	yes	pedestrian	none	18-29	5	pedestrian_side	human	sidewalk	swerve	swerve	pedestrians_vs_single_pedestrian	3v1
5417	female	yes	car_occupant	more than 10 years	50-59	4	observer	self-driving	sidewalk	swerve	swerve	pedestrians_vs_single_pedestrian	4v1
5417	female	yes	car_occupant	more than 10 years	50-59	4	observer	self-driving	sidewalk	swerve	swerve	pedestrians_vs_single_pedestrian	3v1
5417	female	yes	car_occupant	more than 10 years	50-59	4	observer	self-driving	sidewalk	swerve	stay	pedestrians_vs_single_pedestrian	2v1
5417	female	yes	car_occupant	more than 10 years	50-59	4	observer	self-driving	road	swerve	stay	pedestrians_vs_single_pedestrian	4v1
5417	female	yes	car_occupant	more than 10 years	50-59	4	observer	self-driving	sidewalk	swerve	stay	pedestrians_vs_single_pedestrian	1v1
5417	female	yes	car_occupant	more than 10 years	50-59	4	observer	self-driving	road	swerve	stay	pedestrians_vs_single_pedestrian	3v1
5417	female	yes	car_occupant	more than 10 years	50-59	4	observer	self-driving	road	swerve	stay	pedestrians_vs_single_pedestrian	1v1
5417	female	yes	car_occupant	more than 10 years	50-59	4	observer	self-driving	road	swerve	swerve	pedestrians_vs_single_pedestrian	2v1
5418	male	yes	car_occupant	more than 10 years	50-59	3	car_occupant	human	sidewalk	swerve	swerve	pedestrians_vs_single_pedestrian	1v1
5418	male	yes	car_occupant	more than 10 years	50-59	3	car_occupant	human	sidewalk	swerve	swerve	pedestrians_vs_single_pedestrian	3v1
5418	male	yes	car_occupant	more than 10 years	50-59	3	car_occupant	human	road	swerve	stay	pedestrians_vs_single_pedestrian	3v1
5418	male	yes	car_occupant	more than 10 years	50-59	3	car_occupant	human	sidewalk	swerve	swerve	pedestrians_vs_single_pedestrian	2v1
5418	male	yes	car_occupant	more than 10 years	50-59	3	car_occupant	human	road	swerve	stay	pedestrians_vs_single_pedestrian	1v1
5418	male	yes	car_occupant	more than 10 years	50-59	3	car_occupant	human	road	swerve	stay	pedestrians_vs_single_pedestrian	2v1
5418	male	yes	car_occupant	more than 10 years	50-59	3	car_occupant	human	sidewalk	swerve	stay	pedestrians_vs_single_pedestrian	4v1
5418	male	yes	car_occupant	more than 10 years	50-59	3	car_occupant	human	road	swerve	swerve	pedestrians_vs_single_pedestrian	4v1
5433	male	yes	pedestrian	more than 10 years	50-59	1	pedestrian_side	self-driving	road	swerve	swerve	pedestrians_vs_single_pedestrian	3v1
5433	male	yes	pedestrian	more than 10 years	50-59	1	pedestrian_side	self-driving	sidewalk	swerve	swerve	pedestrians_vs_single_pedestrian	4v1
5433	male	yes	pedestrian	more than 10 years	50-59	1	pedestrian_side	self-driving	road	swerve	stay	pedestrians_vs_single_pedestrian	4v1
5433	male	yes	pedestrian	more than 10 years	50-59	1	pedestrian_side	self-driving	sidewalk	swerve	swerve	pedestrians_vs_single_pedestrian	3v1
5433	male	yes	pedestrian	more than 10 years	50-59	1	pedestrian_side	self-driving	road	swerve	stay	pedestrians_vs_single_pedestrian	1v1
5433	male	yes	pedestrian	more than 10 years	50-59	1	pedestrian_side	self-driving	sidewalk	swerve	stay	pedestrians_vs_single_pedestrian	2v1
5433	male	yes	pedestrian	more than 10 years	50-59	1	pedestrian_side	self-driving	sidewalk	swerve	stay	pedestrians_vs_single_pedestrian	1v1
5433	male	yes	pedestrian	more than 10 years	50-59	1	pedestrian_side	self-driving	road	swerve	swerve	pedestrians_vs_single_pedestrian	2v1
5461	male	yes	car_occupant	6 to 10 years	18-29	5	car_occupant	self-driving	road	swerve	swerve	pedestrians_vs_single_pedestrian	1v1
5461	male	yes	car_occupant	6 to 10 years	18-29	5	car_occupant	self-driving	road	swerve	swerve	pedestrians_vs_single_pedestrian	4v1
5461	male	yes	car_occupant	6 to 10 years	18-29	5	car_occupant	self-driving	sidewalk	swerve	swerve	pedestrians_vs_single_pedestrian	2v1
5461	male	yes	car_occupant	6 to 10 years	18-29	5	car_occupant	self-driving	road	swerve	stay	pedestrians_vs_single_pedestrian	2v1
5461	male	yes	car_occupant	6 to 10 years	18-29	5	car_occupant	self-driving	sidewalk	swerve	stay	pedestrians_vs_single_pedestrian	1v1
5461	male	yes	car_occupant	6 to 10 years	18-29	5	car_occupant	self-driving	sidewalk	swerve	swerve	pedestrians_vs_single_pedestrian	3v1
5461	male	yes	car_occupant	6 to 10 years	18-29	5	car_occupant	self-driving	road	swerve	swerve	pedestrians_vs_single_pedestrian	3v1
5461	male	yes	car_occupant	6 to 10 years	18-29	5	car_occupant	self-driving	sidewalk	swerve	swerve	pedestrians_vs_single_pedestrian	4v1
5465	male	yes	car_occupant	more than 10 years	30-39	2	pedestrian_front	human	sidewalk	stay	swerve	pedestrians_vs_single_pedestrian	3v1
5465	male	yes	car_occupant	more than 10 years	30-39	2	pedestrian_front	human	road	stay	swerve	pedestrians_vs_single_pedestrian	1v1
5465	male	yes	car_occupant	more than 10 years	30-39	2	pedestrian_front	human	sidewalk	stay	stay	pedestrians_vs_single_pedestrian	4v1
5465	male	yes	car_occupant	more than 10 years	30-39	2	pedestrian_front	human	sidewalk	stay	stay	pedestrians_vs_single_pedestrian	2v1
5465	male	yes	car_occupant	more than 10 years	30-39	2	pedestrian_front	human	road	swerve	swerve	pedestrians_vs_single_pedestrian	2v1
5465	male	yes	car_occupant	more than 10 years	30-39	2	pedestrian_front	human	road	swerve	swerve	pedestrians_vs_single_pedestrian	4v1
5465	male	yes	car_occupant	more than 10 years	30-39	2	pedestrian_front	human	sidewalk	stay	stay	pedestrians_vs_single_pedestrian	1v1
5465	male	yes	car_occupant	more than 10 years	30-39	2	pedestrian_front	human	road	swerve	stay	pedestrians_vs_single_pedestrian	3v1
5473	male	yes	pedestrian	NA	70-79	4	pedestrian_front	self-driving	road	stay	swerve	pedestrians_vs_single_pedestrian	3v1
5473	male	yes	pedestrian	NA	70-79	4	pedestrian_front	self-driving	sidewalk	stay	stay	pedestrians_vs_single_pedestrian	4v1
5473	male	yes	pedestrian	NA	70-79	4	pedestrian_front	self-driving	sidewalk	stay	stay	pedestrians_vs_single_pedestrian	1v1
5473	male	yes	pedestrian	NA	70-79	4	pedestrian_front	self-driving	road	stay	stay	pedestrians_vs_single_pedestrian	2v1
5473	male	yes	pedestrian	NA	70-79	4	pedestrian_front	self-driving	sidewalk	stay	swerve	pedestrians_vs_single_pedestrian	2v1
5473	male	yes	pedestrian	NA	70-79	4	pedestrian_front	self-driving	road	stay	stay	pedestrians_vs_single_pedestrian	1v1
5473	male	yes	pedestrian	NA	70-79	4	pedestrian_front	self-driving	sidewalk	stay	stay	pedestrians_vs_single_pedestrian	3v1
5473	male	yes	pedestrian	NA	70-79	4	pedestrian_front	self-driving	road	swerve	swerve	pedestrians_vs_single_pedestrian	4v1
5548	male	yes	pedestrian	more than 10 years	40-49	3	pedestrian_side	human	road	swerve	swerve	pedestrians_vs_single_pedestrian	4v1
5548	male	yes	pedestrian	more than 10 years	40-49	3	pedestrian_side	human	sidewalk	swerve	stay	pedestrians_vs_single_pedestrian	2v1
5548	male	yes	pedestrian	more than 10 years	40-49	3	pedestrian_side	human	road	swerve	swerve	pedestrians_vs_single_pedestrian	3v1
5548	male	yes	pedestrian	more than 10 years	40-49	3	pedestrian_side	human	sidewalk	swerve	stay	pedestrians_vs_single_pedestrian	4v1
5548	male	yes	pedestrian	more than 10 years	40-49	3	pedestrian_side	human	road	swerve	stay	pedestrians_vs_single_pedestrian	1v1
5548	male	yes	pedestrian	more than 10 years	40-49	3	pedestrian_side	human	sidewalk	swerve	swerve	pedestrians_vs_single_pedestrian	3v1
5548	male	yes	pedestrian	more than 10 years	40-49	3	pedestrian_side	human	sidewalk	swerve	stay	pedestrians_vs_single_pedestrian	1v1
5548	male	yes	pedestrian	more than 10 years	40-49	3	pedestrian_side	human	road	swerve	swerve	pedestrians_vs_single_pedestrian	2v1
5549	male	yes	car_occupant	more than 10 years	60-69	5	observer	human	sidewalk	stay	swerve	pedestrians_vs_single_pedestrian	1v1
5549	male	yes	car_occupant	more than 10 years	60-69	5	observer	human	sidewalk	swerve	stay	pedestrians_vs_single_pedestrian	3v1
5549	male	yes	car_occupant	more than 10 years	60-69	5	observer	human	sidewalk	swerve	swerve	pedestrians_vs_single_pedestrian	4v1
5549	male	yes	car_occupant	more than 10 years	60-69	5	observer	human	road	swerve	swerve	pedestrians_vs_single_pedestrian	3v1
5549	male	yes	car_occupant	more than 10 years	60-69	5	observer	human	road	stay	swerve	pedestrians_vs_single_pedestrian	1v1
5549	male	yes	car_occupant	more than 10 years	60-69	5	observer	human	road	swerve	stay	pedestrians_vs_single_pedestrian	2v1
5549	male	yes	car_occupant	more than 10 years	60-69	5	observer	human	road	swerve	stay	pedestrians_vs_single_pedestrian	4v1
5549	male	yes	car_occupant	more than 10 years	60-69	5	observer	human	sidewalk	swerve	swerve	pedestrians_vs_single_pedestrian	2v1
5553	female	yes	car_occupant	more than 10 years	60-69	3	observer	human	road	swerve	stay	pedestrians_vs_single_pedestrian	2v1
5553	female	yes	car_occupant	more than 10 years	60-69	3	observer	human	road	swerve	swerve	pedestrians_vs_single_pedestrian	1v1
5553	female	yes	car_occupant	more than 10 years	60-69	3	observer	human	sidewalk	swerve	stay	pedestrians_vs_single_pedestrian	2v1
5553	female	yes	car_occupant	more than 10 years	60-69	3	observer	human	sidewalk	swerve	swerve	pedestrians_vs_single_pedestrian	1v1
5553	female	yes	car_occupant	more than 10 years	60-69	3	observer	human	sidewalk	swerve	stay	pedestrians_vs_single_pedestrian	3v1
5553	female	yes	car_occupant	more than 10 years	60-69	3	observer	human	road	swerve	swerve	pedestrians_vs_single_pedestrian	4v1
5553	female	yes	car_occupant	more than 10 years	60-69	3	observer	human	sidewalk	swerve	swerve	pedestrians_vs_single_pedestrian	4v1
5553	female	yes	car_occupant	more than 10 years	60-69	3	observer	human	road	swerve	stay	pedestrians_vs_single_pedestrian	3v1
5554	female	yes	pedestrian	more than 10 years	60-69	1	pedestrian_side	self-driving	road	swerve	stay	pedestrians_vs_single_pedestrian	4v1
5554	female	yes	pedestrian	more than 10 years	60-69	1	pedestrian_side	self-driving	road	swerve	stay	pedestrians_vs_single_pedestrian	2v1
5554	female	yes	pedestrian	more than 10 years	60-69	1	pedestrian_side	self-driving	sidewalk	swerve	swerve	pedestrians_vs_single_pedestrian	1v1
5554	female	yes	pedestrian	more than 10 years	60-69	1	pedestrian_side	self-driving	road	swerve	swerve	pedestrians_vs_single_pedestrian	3v1
5554	female	yes	pedestrian	more than 10 years	60-69	1	pedestrian_side	self-driving	sidewalk	swerve	stay	pedestrians_vs_single_pedestrian	2v1
5554	female	yes	pedestrian	more than 10 years	60-69	1	pedestrian_side	self-driving	road	swerve	swerve	pedestrians_vs_single_pedestrian	1v1
5554	female	yes	pedestrian	more than 10 years	60-69	1	pedestrian_side	self-driving	sidewalk	swerve	swerve	pedestrians_vs_single_pedestrian	3v1
5554	female	yes	pedestrian	more than 10 years	60-69	1	pedestrian_side	self-driving	sidewalk	swerve	stay	pedestrians_vs_single_pedestrian	4v1
5555	female	yes	car_occupant	more than 10 years	60-69	1	car_occupant	human	road	swerve	stay	pedestrians_vs_single_pedestrian	4v1
5555	female	yes	car_occupant	more than 10 years	60-69	1	car_occupant	human	road	swerve	stay	pedestrians_vs_single_pedestrian	3v1
5555	female	yes	car_occupant	more than 10 years	60-69	1	car_occupant	human	sidewalk	swerve	stay	pedestrians_vs_single_pedestrian	3v1
5555	female	yes	car_occupant	more than 10 years	60-69	1	car_occupant	human	road	swerve	swerve	pedestrians_vs_single_pedestrian	2v1
5555	female	yes	car_occupant	more than 10 years	60-69	1	car_occupant	human	road	stay	swerve	pedestrians_vs_single_pedestrian	1v1
5555	female	yes	car_occupant	more than 10 years	60-69	1	car_occupant	human	sidewalk	stay	stay	pedestrians_vs_single_pedestrian	4v1
5555	female	yes	car_occupant	more than 10 years	60-69	1	car_occupant	human	sidewalk	stay	stay	pedestrians_vs_single_pedestrian	2v1
5555	female	yes	car_occupant	more than 10 years	60-69	1	car_occupant	human	sidewalk	stay	swerve	pedestrians_vs_single_pedestrian	1v1
5557	male	yes	car_occupant	more than 10 years	60-69	5	car_occupant	self-driving	sidewalk	swerve	stay	pedestrians_vs_single_pedestrian	3v1
5557	male	yes	car_occupant	more than 10 years	60-69	5	car_occupant	self-driving	sidewalk	stay	stay	pedestrians_vs_single_pedestrian	1v1
5557	male	yes	car_occupant	more than 10 years	60-69	5	car_occupant	self-driving	road	swerve	swerve	pedestrians_vs_single_pedestrian	4v1
5557	male	yes	car_occupant	more than 10 years	60-69	5	car_occupant	self-driving	road	swerve	swerve	pedestrians_vs_single_pedestrian	3v1
5557	male	yes	car_occupant	more than 10 years	60-69	5	car_occupant	self-driving	road	swerve	stay	pedestrians_vs_single_pedestrian	1v1
5557	male	yes	car_occupant	more than 10 years	60-69	5	car_occupant	self-driving	sidewalk	stay	swerve	pedestrians_vs_single_pedestrian	2v1
5557	male	yes	car_occupant	more than 10 years	60-69	5	car_occupant	self-driving	road	swerve	swerve	pedestrians_vs_single_pedestrian	2v1
5557	male	yes	car_occupant	more than 10 years	60-69	5	car_occupant	self-driving	sidewalk	stay	stay	pedestrians_vs_single_pedestrian	4v1
5564	female	no	pedestrian	more than 10 years	50-59	3	observer	self-driving	road	swerve	stay	pedestrians_vs_single_pedestrian	1v1
5564	female	no	pedestrian	more than 10 years	50-59	3	observer	self-driving	road	swerve	stay	pedestrians_vs_single_pedestrian	3v1
5564	female	no	pedestrian	more than 10 years	50-59	3	observer	self-driving	sidewalk	stay	stay	pedestrians_vs_single_pedestrian	2v1
5564	female	no	pedestrian	more than 10 years	50-59	3	observer	self-driving	sidewalk	stay	swerve	pedestrians_vs_single_pedestrian	1v1
5564	female	no	pedestrian	more than 10 years	50-59	3	observer	self-driving	road	swerve	stay	pedestrians_vs_single_pedestrian	4v1
5564	female	no	pedestrian	more than 10 years	50-59	3	observer	self-driving	sidewalk	stay	swerve	pedestrians_vs_single_pedestrian	3v1
5564	female	no	pedestrian	more than 10 years	50-59	3	observer	self-driving	road	swerve	swerve	pedestrians_vs_single_pedestrian	2v1
5564	female	no	pedestrian	more than 10 years	50-59	3	observer	self-driving	sidewalk	stay	swerve	pedestrians_vs_single_pedestrian	4v1
5567	male	yes	pedestrian	more than 10 years	60-69	4	pedestrian_front	human	road	swerve	stay	pedestrians_vs_single_pedestrian	3v1
5567	male	yes	pedestrian	more than 10 years	60-69	4	pedestrian_front	human	sidewalk	swerve	swerve	pedestrians_vs_single_pedestrian	3v1
5567	male	yes	pedestrian	more than 10 years	60-69	4	pedestrian_front	human	road	swerve	swerve	pedestrians_vs_single_pedestrian	4v1
5567	male	yes	pedestrian	more than 10 years	60-69	4	pedestrian_front	human	sidewalk	swerve	swerve	pedestrians_vs_single_pedestrian	2v1
5567	male	yes	pedestrian	more than 10 years	60-69	4	pedestrian_front	human	road	swerve	stay	pedestrians_vs_single_pedestrian	2v1
5567	male	yes	pedestrian	more than 10 years	60-69	4	pedestrian_front	human	road	swerve	stay	pedestrians_vs_single_pedestrian	1v1
5567	male	yes	pedestrian	more than 10 years	60-69	4	pedestrian_front	human	sidewalk	swerve	swerve	pedestrians_vs_single_pedestrian	4v1
5567	male	yes	pedestrian	more than 10 years	60-69	4	pedestrian_front	human	sidewalk	swerve	stay	pedestrians_vs_single_pedestrian	1v1
5579	female	yes	car_occupant	more than 10 years	40-49	1	pedestrian_side	human	road	swerve	stay	pedestrians_vs_single_pedestrian	3v1
5579	female	yes	car_occupant	more than 10 years	40-49	1	pedestrian_side	human	sidewalk	stay	swerve	pedestrians_vs_single_pedestrian	2v1
5579	female	yes	car_occupant	more than 10 years	40-49	1	pedestrian_side	human	sidewalk	swerve	swerve	pedestrians_vs_single_pedestrian	4v1
5579	female	yes	car_occupant	more than 10 years	40-49	1	pedestrian_side	human	road	swerve	swerve	pedestrians_vs_single_pedestrian	4v1
5579	female	yes	car_occupant	more than 10 years	40-49	1	pedestrian_side	human	sidewalk	stay	stay	pedestrians_vs_single_pedestrian	1v1
5579	female	yes	car_occupant	more than 10 years	40-49	1	pedestrian_side	human	road	stay	swerve	pedestrians_vs_single_pedestrian	1v1
5579	female	yes	car_occupant	more than 10 years	40-49	1	pedestrian_side	human	sidewalk	swerve	stay	pedestrians_vs_single_pedestrian	3v1
5579	female	yes	car_occupant	more than 10 years	40-49	1	pedestrian_side	human	road	swerve	stay	pedestrians_vs_single_pedestrian	2v1
5630	male	yes	car_occupant	more than 10 years	60-69	5	pedestrian_side	human	sidewalk	swerve	swerve	pedestrians_vs_single_pedestrian	4v1
5630	male	yes	car_occupant	more than 10 years	60-69	5	pedestrian_side	human	road	swerve	swerve	pedestrians_vs_single_pedestrian	2v1
5630	male	yes	car_occupant	more than 10 years	60-69	5	pedestrian_side	human	road	swerve	stay	pedestrians_vs_single_pedestrian	1v1
5630	male	yes	car_occupant	more than 10 years	60-69	5	pedestrian_side	human	sidewalk	swerve	stay	pedestrians_vs_single_pedestrian	1v1
5630	male	yes	car_occupant	more than 10 years	60-69	5	pedestrian_side	human	sidewalk	swerve	swerve	pedestrians_vs_single_pedestrian	3v1
5630	male	yes	car_occupant	more than 10 years	60-69	5	pedestrian_side	human	road	swerve	swerve	pedestrians_vs_single_pedestrian	3v1
5630	male	yes	car_occupant	more than 10 years	60-69	5	pedestrian_side	human	sidewalk	swerve	stay	pedestrians_vs_single_pedestrian	2v1
5630	male	yes	car_occupant	more than 10 years	60-69	5	pedestrian_side	human	road	swerve	stay	pedestrians_vs_single_pedestrian	4v1
5635	male	yes	pedestrian	more than 10 years	60-69	4	pedestrian_front	human	sidewalk	stay	stay	pedestrians_vs_single_pedestrian	2v1
5635	male	yes	pedestrian	more than 10 years	60-69	4	pedestrian_front	human	sidewalk	stay	swerve	pedestrians_vs_single_pedestrian	1v1
5635	male	yes	pedestrian	more than 10 years	60-69	4	pedestrian_front	human	road	stay	swerve	pedestrians_vs_single_pedestrian	2v1
5635	male	yes	pedestrian	more than 10 years	60-69	4	pedestrian_front	human	road	stay	swerve	pedestrians_vs_single_pedestrian	3v1
5635	male	yes	pedestrian	more than 10 years	60-69	4	pedestrian_front	human	sidewalk	swerve	stay	pedestrians_vs_single_pedestrian	4v1
5635	male	yes	pedestrian	more than 10 years	60-69	4	pedestrian_front	human	sidewalk	stay	stay	pedestrians_vs_single_pedestrian	3v1
5635	male	yes	pedestrian	more than 10 years	60-69	4	pedestrian_front	human	road	stay	stay	pedestrians_vs_single_pedestrian	1v1
5635	male	yes	pedestrian	more than 10 years	60-69	4	pedestrian_front	human	road	swerve	swerve	pedestrians_vs_single_pedestrian	4v1
5672	female	yes	car_occupant	more than 10 years	40-49	3	observer	human	sidewalk	swerve	swerve	pedestrians_vs_single_pedestrian	4v1
5672	female	yes	car_occupant	more than 10 years	40-49	3	observer	human	road	swerve	stay	pedestrians_vs_single_pedestrian	2v1
5672	female	yes	car_occupant	more than 10 years	40-49	3	observer	human	road	swerve	stay	pedestrians_vs_single_pedestrian	4v1
5672	female	yes	car_occupant	more than 10 years	40-49	3	observer	human	road	swerve	swerve	pedestrians_vs_single_pedestrian	3v1
5672	female	yes	car_occupant	more than 10 years	40-49	3	observer	human	road	swerve	stay	pedestrians_vs_single_pedestrian	1v1
5672	female	yes	car_occupant	more than 10 years	40-49	3	observer	human	sidewalk	swerve	swerve	pedestrians_vs_single_pedestrian	1v1
5672	female	yes	car_occupant	more than 10 years	40-49	3	observer	human	sidewalk	swerve	stay	pedestrians_vs_single_pedestrian	2v1
5672	female	yes	car_occupant	more than 10 years	40-49	3	observer	human	sidewalk	swerve	stay	pedestrians_vs_single_pedestrian	3v1
5699	female	yes	car_occupant	more than 10 years	60-69	1	observer	self-driving	sidewalk	stay	stay	pedestrians_vs_single_pedestrian	1v1
5699	female	yes	car_occupant	more than 10 years	60-69	1	observer	self-driving	sidewalk	swerve	stay	pedestrians_vs_single_pedestrian	4v1
5699	female	yes	car_occupant	more than 10 years	60-69	1	observer	self-driving	road	swerve	stay	pedestrians_vs_single_pedestrian	4v1
5699	female	yes	car_occupant	more than 10 years	60-69	1	observer	self-driving	road	swerve	swerve	pedestrians_vs_single_pedestrian	1v1
5699	female	yes	car_occupant	more than 10 years	60-69	1	observer	self-driving	road	swerve	swerve	pedestrians_vs_single_pedestrian	3v1
5699	female	yes	car_occupant	more than 10 years	60-69	1	observer	self-driving	road	swerve	swerve	pedestrians_vs_single_pedestrian	2v1
5699	female	yes	car_occupant	more than 10 years	60-69	1	observer	self-driving	sidewalk	swerve	swerve	pedestrians_vs_single_pedestrian	3v1
5699	female	yes	car_occupant	more than 10 years	60-69	1	observer	self-driving	sidewalk	swerve	swerve	pedestrians_vs_single_pedestrian	2v1
5704	female	yes	car_occupant	6 to 10 years	18-29	3	pedestrian_side	self-driving	sidewalk	stay	stay	pedestrians_vs_single_pedestrian	1v1
5704	female	yes	car_occupant	6 to 10 years	18-29	3	pedestrian_side	self-driving	sidewalk	swerve	stay	pedestrians_vs_single_pedestrian	4v1
5704	female	yes	car_occupant	6 to 10 years	18-29	3	pedestrian_side	self-driving	road	swerve	swerve	pedestrians_vs_single_pedestrian	3v1
5704	female	yes	car_occupant	6 to 10 years	18-29	3	pedestrian_side	self-driving	road	swerve	swerve	pedestrians_vs_single_pedestrian	2v1
5704	female	yes	car_occupant	6 to 10 years	18-29	3	pedestrian_side	self-driving	road	swerve	swerve	pedestrians_vs_single_pedestrian	4v1
5704	female	yes	car_occupant	6 to 10 years	18-29	3	pedestrian_side	self-driving	sidewalk	swerve	stay	pedestrians_vs_single_pedestrian	2v1
5704	female	yes	car_occupant	6 to 10 years	18-29	3	pedestrian_side	self-driving	road	stay	stay	pedestrians_vs_single_pedestrian	1v1
5704	female	yes	car_occupant	6 to 10 years	18-29	3	pedestrian_side	self-driving	sidewalk	swerve	swerve	pedestrians_vs_single_pedestrian	3v1
5726	male	yes	pedestrian	less than 5 years	18-29	5	car_occupant	human	sidewalk	swerve	swerve	pedestrians_vs_single_pedestrian	4v1
5726	male	yes	pedestrian	less than 5 years	18-29	5	car_occupant	human	road	stay	stay	pedestrians_vs_single_pedestrian	1v1
5726	male	yes	pedestrian	less than 5 years	18-29	5	car_occupant	human	sidewalk	swerve	swerve	pedestrians_vs_single_pedestrian	3v1
5726	male	yes	pedestrian	less than 5 years	18-29	5	car_occupant	human	sidewalk	stay	swerve	pedestrians_vs_single_pedestrian	1v1
5726	male	yes	pedestrian	less than 5 years	18-29	5	car_occupant	human	sidewalk	swerve	stay	pedestrians_vs_single_pedestrian	2v1
5726	male	yes	pedestrian	less than 5 years	18-29	5	car_occupant	human	road	swerve	stay	pedestrians_vs_single_pedestrian	2v1
5726	male	yes	pedestrian	less than 5 years	18-29	5	car_occupant	human	road	swerve	swerve	pedestrians_vs_single_pedestrian	3v1
5726	male	yes	pedestrian	less than 5 years	18-29	5	car_occupant	human	road	swerve	swerve	pedestrians_vs_single_pedestrian	4v1
5727	male	yes	car_occupant	more than 10 years	18-29	4	car_occupant	self-driving	road	stay	stay	pedestrians_vs_single_pedestrian	1v1
5727	male	yes	car_occupant	more than 10 years	18-29	4	car_occupant	self-driving	road	swerve	stay	pedestrians_vs_single_pedestrian	3v1
5727	male	yes	car_occupant	more than 10 years	18-29	4	car_occupant	self-driving	road	swerve	stay	pedestrians_vs_single_pedestrian	2v1
5727	male	yes	car_occupant	more than 10 years	18-29	4	car_occupant	self-driving	road	swerve	stay	pedestrians_vs_single_pedestrian	4v1
5727	male	yes	car_occupant	more than 10 years	18-29	4	car_occupant	self-driving	sidewalk	swerve	swerve	pedestrians_vs_single_pedestrian	2v1
5727	male	yes	car_occupant	more than 10 years	18-29	4	car_occupant	self-driving	sidewalk	swerve	stay	pedestrians_vs_single_pedestrian	3v1
5727	male	yes	car_occupant	more than 10 years	18-29	4	car_occupant	self-driving	sidewalk	stay	swerve	pedestrians_vs_single_pedestrian	1v1
5727	male	yes	car_occupant	more than 10 years	18-29	4	car_occupant	self-driving	sidewalk	swerve	swerve	pedestrians_vs_single_pedestrian	4v1
5732	female	yes	pedestrian	more than 10 years	40-49	5	pedestrian_side	human	road	swerve	swerve	pedestrians_vs_single_pedestrian	4v1
5732	female	yes	pedestrian	more than 10 years	40-49	5	pedestrian_side	human	sidewalk	stay	stay	pedestrians_vs_single_pedestrian	1v1
5732	female	yes	pedestrian	more than 10 years	40-49	5	pedestrian_side	human	sidewalk	swerve	swerve	pedestrians_vs_single_pedestrian	4v1
5732	female	yes	pedestrian	more than 10 years	40-49	5	pedestrian_side	human	sidewalk	swerve	swerve	pedestrians_vs_single_pedestrian	2v1
5732	female	yes	pedestrian	more than 10 years	40-49	5	pedestrian_side	human	road	swerve	swerve	pedestrians_vs_single_pedestrian	1v1
5732	female	yes	pedestrian	more than 10 years	40-49	5	pedestrian_side	human	road	swerve	stay	pedestrians_vs_single_pedestrian	2v1
5732	female	yes	pedestrian	more than 10 years	40-49	5	pedestrian_side	human	sidewalk	swerve	stay	pedestrians_vs_single_pedestrian	3v1
5732	female	yes	pedestrian	more than 10 years	40-49	5	pedestrian_side	human	road	swerve	stay	pedestrians_vs_single_pedestrian	3v1
5734	female	yes	pedestrian	more than 10 years	60-69	4	observer	self-driving	sidewalk	stay	stay	pedestrians_vs_single_pedestrian	1v1
5734	female	yes	pedestrian	more than 10 years	60-69	4	observer	self-driving	sidewalk	swerve	stay	pedestrians_vs_single_pedestrian	4v1
5734	female	yes	pedestrian	more than 10 years	60-69	4	observer	self-driving	road	swerve	swerve	pedestrians_vs_single_pedestrian	2v1
5734	female	yes	pedestrian	more than 10 years	60-69	4	observer	self-driving	road	swerve	stay	pedestrians_vs_single_pedestrian	4v1
5734	female	yes	pedestrian	more than 10 years	60-69	4	observer	self-driving	sidewalk	swerve	swerve	pedestrians_vs_single_pedestrian	3v1
5734	female	yes	pedestrian	more than 10 years	60-69	4	observer	self-driving	road	stay	swerve	pedestrians_vs_single_pedestrian	1v1
5734	female	yes	pedestrian	more than 10 years	60-69	4	observer	self-driving	sidewalk	swerve	stay	pedestrians_vs_single_pedestrian	2v1
5734	female	yes	pedestrian	more than 10 years	60-69	4	observer	self-driving	road	swerve	swerve	pedestrians_vs_single_pedestrian	3v1
5747	male	yes	pedestrian	none	18-29	3	pedestrian_side	self-driving	road	stay	swerve	pedestrians_vs_single_pedestrian	1v1
5747	male	yes	pedestrian	none	18-29	3	pedestrian_side	self-driving	road	swerve	swerve	pedestrians_vs_single_pedestrian	3v1
5747	male	yes	pedestrian	none	18-29	3	pedestrian_side	self-driving	sidewalk	swerve	swerve	pedestrians_vs_single_pedestrian	4v1
5747	male	yes	pedestrian	none	18-29	3	pedestrian_side	self-driving	sidewalk	swerve	stay	pedestrians_vs_single_pedestrian	2v1
5747	male	yes	pedestrian	none	18-29	3	pedestrian_side	self-driving	sidewalk	swerve	swerve	pedestrians_vs_single_pedestrian	3v1
5747	male	yes	pedestrian	none	18-29	3	pedestrian_side	self-driving	sidewalk	stay	stay	pedestrians_vs_single_pedestrian	1v1
5747	male	yes	pedestrian	none	18-29	3	pedestrian_side	self-driving	road	swerve	stay	pedestrians_vs_single_pedestrian	2v1
5747	male	yes	pedestrian	none	18-29	3	pedestrian_side	self-driving	road	swerve	stay	pedestrians_vs_single_pedestrian	4v1
5753	male	yes	pedestrian	less than 5 years	18-29	5	pedestrian_front	human	sidewalk	stay	stay	pedestrians_vs_single_pedestrian	2v1
5753	male	yes	pedestrian	less than 5 years	18-29	5	pedestrian_front	human	sidewalk	stay	swerve	pedestrians_vs_single_pedestrian	1v1
5753	male	yes	pedestrian	less than 5 years	18-29	5	pedestrian_front	human	road	stay	stay	pedestrians_vs_single_pedestrian	3v1
5753	male	yes	pedestrian	less than 5 years	18-29	5	pedestrian_front	human	sidewalk	swerve	swerve	pedestrians_vs_single_pedestrian	4v1
5753	male	yes	pedestrian	less than 5 years	18-29	5	pedestrian_front	human	road	swerve	stay	pedestrians_vs_single_pedestrian	2v1
5753	male	yes	pedestrian	less than 5 years	18-29	5	pedestrian_front	human	road	swerve	swerve	pedestrians_vs_single_pedestrian	4v1
5753	male	yes	pedestrian	less than 5 years	18-29	5	pedestrian_front	human	sidewalk	swerve	stay	pedestrians_vs_single_pedestrian	3v1
5753	male	yes	pedestrian	less than 5 years	18-29	5	pedestrian_front	human	road	stay	swerve	pedestrians_vs_single_pedestrian	1v1
5757	male	yes	car_occupant	6 to 10 years	18-29	2	car_occupant	self-driving	sidewalk	swerve	stay	pedestrians_vs_single_pedestrian	4v1
5757	male	yes	car_occupant	6 to 10 years	18-29	2	car_occupant	self-driving	road	swerve	stay	pedestrians_vs_single_pedestrian	1v1
5757	male	yes	car_occupant	6 to 10 years	18-29	2	car_occupant	self-driving	sidewalk	swerve	stay	pedestrians_vs_single_pedestrian	2v1
5757	male	yes	car_occupant	6 to 10 years	18-29	2	car_occupant	self-driving	road	swerve	swerve	pedestrians_vs_single_pedestrian	2v1
5757	male	yes	car_occupant	6 to 10 years	18-29	2	car_occupant	self-driving	sidewalk	swerve	stay	pedestrians_vs_single_pedestrian	3v1
5757	male	yes	car_occupant	6 to 10 years	18-29	2	car_occupant	self-driving	sidewalk	swerve	stay	pedestrians_vs_single_pedestrian	1v1
5757	male	yes	car_occupant	6 to 10 years	18-29	2	car_occupant	self-driving	road	swerve	swerve	pedestrians_vs_single_pedestrian	4v1
5757	male	yes	car_occupant	6 to 10 years	18-29	2	car_occupant	self-driving	road	swerve	swerve	pedestrians_vs_single_pedestrian	3v1
5762	female	yes	car_occupant	less than 5 years	18-29	4	car_occupant	human	sidewalk	swerve	swerve	pedestrians_vs_single_pedestrian	4v1
5762	female	yes	car_occupant	less than 5 years	18-29	4	car_occupant	human	sidewalk	swerve	swerve	pedestrians_vs_single_pedestrian	2v1
5762	female	yes	car_occupant	less than 5 years	18-29	4	car_occupant	human	sidewalk	stay	swerve	pedestrians_vs_single_pedestrian	1v1
5762	female	yes	car_occupant	less than 5 years	18-29	4	car_occupant	human	road	swerve	stay	pedestrians_vs_single_pedestrian	4v1
5762	female	yes	car_occupant	less than 5 years	18-29	4	car_occupant	human	sidewalk	swerve	swerve	pedestrians_vs_single_pedestrian	3v1
5762	female	yes	car_occupant	less than 5 years	18-29	4	car_occupant	human	road	swerve	stay	pedestrians_vs_single_pedestrian	3v1
5762	female	yes	car_occupant	less than 5 years	18-29	4	car_occupant	human	road	swerve	stay	pedestrians_vs_single_pedestrian	2v1
5762	female	yes	car_occupant	less than 5 years	18-29	4	car_occupant	human	road	stay	swerve	pedestrians_vs_single_pedestrian	1v1
5784	female	yes	car_occupant	6 to 10 years	18-29	3	observer	self-driving	road	swerve	swerve	pedestrians_vs_single_pedestrian	2v1
5784	female	yes	car_occupant	6 to 10 years	18-29	3	observer	self-driving	road	swerve	swerve	pedestrians_vs_single_pedestrian	4v1
5784	female	yes	car_occupant	6 to 10 years	18-29	3	observer	self-driving	sidewalk	swerve	stay	pedestrians_vs_single_pedestrian	4v1
5784	female	yes	car_occupant	6 to 10 years	18-29	3	observer	self-driving	sidewalk	swerve	stay	pedestrians_vs_single_pedestrian	2v1
5784	female	yes	car_occupant	6 to 10 years	18-29	3	observer	self-driving	sidewalk	swerve	swerve	pedestrians_vs_single_pedestrian	3v1
5784	female	yes	car_occupant	6 to 10 years	18-29	3	observer	self-driving	road	swerve	swerve	pedestrians_vs_single_pedestrian	3v1
5784	female	yes	car_occupant	6 to 10 years	18-29	3	observer	self-driving	sidewalk	stay	stay	pedestrians_vs_single_pedestrian	1v1
5784	female	yes	car_occupant	6 to 10 years	18-29	3	observer	self-driving	road	stay	swerve	pedestrians_vs_single_pedestrian	1v1
5803	female	yes	car_occupant	more than 10 years	30-39	1	car_occupant	self-driving	road	stay	swerve	pedestrians_vs_single_pedestrian	1v1
5803	female	yes	car_occupant	more than 10 years	30-39	1	car_occupant	self-driving	sidewalk	stay	stay	pedestrians_vs_single_pedestrian	2v1
5803	female	yes	car_occupant	more than 10 years	30-39	1	car_occupant	self-driving	road	stay	swerve	pedestrians_vs_single_pedestrian	2v1
5803	female	yes	car_occupant	more than 10 years	30-39	1	car_occupant	self-driving	road	stay	stay	pedestrians_vs_single_pedestrian	3v1
5803	female	yes	car_occupant	more than 10 years	30-39	1	car_occupant	self-driving	sidewalk	stay	stay	pedestrians_vs_single_pedestrian	3v1
5803	female	yes	car_occupant	more than 10 years	30-39	1	car_occupant	self-driving	road	stay	stay	pedestrians_vs_single_pedestrian	4v1
5803	female	yes	car_occupant	more than 10 years	30-39	1	car_occupant	self-driving	sidewalk	stay	swerve	pedestrians_vs_single_pedestrian	4v1
5803	female	yes	car_occupant	more than 10 years	30-39	1	car_occupant	self-driving	sidewalk	stay	swerve	pedestrians_vs_single_pedestrian	1v1
5804	female	yes	car_occupant	less than 5 years	18-29	2	car_occupant	human	road	swerve	stay	pedestrians_vs_single_pedestrian	3v1
5804	female	yes	car_occupant	less than 5 years	18-29	2	car_occupant	human	sidewalk	swerve	stay	pedestrians_vs_single_pedestrian	4v1
5804	female	yes	car_occupant	less than 5 years	18-29	2	car_occupant	human	sidewalk	stay	stay	pedestrians_vs_single_pedestrian	3v1
5804	female	yes	car_occupant	less than 5 years	18-29	2	car_occupant	human	sidewalk	stay	swerve	pedestrians_vs_single_pedestrian	2v1
5804	female	yes	car_occupant	less than 5 years	18-29	2	car_occupant	human	road	swerve	swerve	pedestrians_vs_single_pedestrian	4v1
5804	female	yes	car_occupant	less than 5 years	18-29	2	car_occupant	human	road	swerve	swerve	pedestrians_vs_single_pedestrian	2v1
5804	female	yes	car_occupant	less than 5 years	18-29	2	car_occupant	human	road	swerve	stay	pedestrians_vs_single_pedestrian	1v1
5804	female	yes	car_occupant	less than 5 years	18-29	2	car_occupant	human	sidewalk	stay	swerve	pedestrians_vs_single_pedestrian	1v1
5862	female	yes	car_occupant	more than 10 years	30-39	3	pedestrian_front	human	sidewalk	stay	swerve	pedestrians_vs_single_pedestrian	2v1
5862	female	yes	car_occupant	more than 10 years	30-39	3	pedestrian_front	human	road	swerve	stay	pedestrians_vs_single_pedestrian	3v1
5862	female	yes	car_occupant	more than 10 years	30-39	3	pedestrian_front	human	sidewalk	stay	swerve	pedestrians_vs_single_pedestrian	4v1
5862	female	yes	car_occupant	more than 10 years	30-39	3	pedestrian_front	human	road	stay	stay	pedestrians_vs_single_pedestrian	2v1
5862	female	yes	car_occupant	more than 10 years	30-39	3	pedestrian_front	human	road	stay	stay	pedestrians_vs_single_pedestrian	1v1
5862	female	yes	car_occupant	more than 10 years	30-39	3	pedestrian_front	human	road	swerve	swerve	pedestrians_vs_single_pedestrian	4v1
5862	female	yes	car_occupant	more than 10 years	30-39	3	pedestrian_front	human	sidewalk	stay	stay	pedestrians_vs_single_pedestrian	1v1
5862	female	yes	car_occupant	more than 10 years	30-39	3	pedestrian_front	human	sidewalk	stay	stay	pedestrians_vs_single_pedestrian	3v1
5864	female	no	pedestrian	more than 10 years	50-59	3	pedestrian_side	self-driving	sidewalk	swerve	swerve	pedestrians_vs_single_pedestrian	3v1
5864	female	no	pedestrian	more than 10 years	50-59	3	pedestrian_side	self-driving	sidewalk	swerve	swerve	pedestrians_vs_single_pedestrian	1v1
5864	female	no	pedestrian	more than 10 years	50-59	3	pedestrian_side	self-driving	road	swerve	stay	pedestrians_vs_single_pedestrian	4v1
5864	female	no	pedestrian	more than 10 years	50-59	3	pedestrian_side	self-driving	sidewalk	swerve	swerve	pedestrians_vs_single_pedestrian	2v1
5864	female	no	pedestrian	more than 10 years	50-59	3	pedestrian_side	self-driving	road	swerve	stay	pedestrians_vs_single_pedestrian	3v1
5864	female	no	pedestrian	more than 10 years	50-59	3	pedestrian_side	self-driving	sidewalk	swerve	stay	pedestrians_vs_single_pedestrian	4v1
5864	female	no	pedestrian	more than 10 years	50-59	3	pedestrian_side	self-driving	road	swerve	stay	pedestrians_vs_single_pedestrian	2v1
5864	female	no	pedestrian	more than 10 years	50-59	3	pedestrian_side	self-driving	road	swerve	swerve	pedestrians_vs_single_pedestrian	1v1
5889	male	yes	pedestrian	6 to 10 years	18-29	3	pedestrian_side	human	road	swerve	swerve	pedestrians_vs_single_pedestrian	4v1
5889	male	yes	pedestrian	6 to 10 years	18-29	3	pedestrian_side	human	road	swerve	swerve	pedestrians_vs_single_pedestrian	2v1
5889	male	yes	pedestrian	6 to 10 years	18-29	3	pedestrian_side	human	sidewalk	swerve	stay	pedestrians_vs_single_pedestrian	2v1
5889	male	yes	pedestrian	6 to 10 years	18-29	3	pedestrian_side	human	sidewalk	swerve	stay	pedestrians_vs_single_pedestrian	1v1
5889	male	yes	pedestrian	6 to 10 years	18-29	3	pedestrian_side	human	sidewalk	swerve	stay	pedestrians_vs_single_pedestrian	3v1
5889	male	yes	pedestrian	6 to 10 years	18-29	3	pedestrian_side	human	road	swerve	swerve	pedestrians_vs_single_pedestrian	3v1
5889	male	yes	pedestrian	6 to 10 years	18-29	3	pedestrian_side	human	sidewalk	swerve	swerve	pedestrians_vs_single_pedestrian	4v1
5889	male	yes	pedestrian	6 to 10 years	18-29	3	pedestrian_side	human	road	swerve	stay	pedestrians_vs_single_pedestrian	1v1
5927	male	yes	pedestrian	6 to 10 years	18-29	2	pedestrian_front	self-driving	sidewalk	swerve	stay	pedestrians_vs_single_pedestrian	1v1
5927	male	yes	pedestrian	6 to 10 years	18-29	2	pedestrian_front	self-driving	sidewalk	swerve	swerve	pedestrians_vs_single_pedestrian	3v1
5927	male	yes	pedestrian	6 to 10 years	18-29	2	pedestrian_front	self-driving	sidewalk	swerve	stay	pedestrians_vs_single_pedestrian	4v1
5927	male	yes	pedestrian	6 to 10 years	18-29	2	pedestrian_front	self-driving	sidewalk	swerve	stay	pedestrians_vs_single_pedestrian	2v1
5927	male	yes	pedestrian	6 to 10 years	18-29	2	pedestrian_front	self-driving	road	swerve	swerve	pedestrians_vs_single_pedestrian	3v1
5927	male	yes	pedestrian	6 to 10 years	18-29	2	pedestrian_front	self-driving	road	swerve	swerve	pedestrians_vs_single_pedestrian	2v1
5927	male	yes	pedestrian	6 to 10 years	18-29	2	pedestrian_front	self-driving	road	swerve	stay	pedestrians_vs_single_pedestrian	4v1
5927	male	yes	pedestrian	6 to 10 years	18-29	2	pedestrian_front	self-driving	road	swerve	stay	pedestrians_vs_single_pedestrian	1v1
5928	female	yes	car_occupant	more than 10 years	18-29	2	observer	human	road	swerve	swerve	pedestrians_vs_single_pedestrian	3v1
5928	female	yes	car_occupant	more than 10 years	18-29	2	observer	human	sidewalk	swerve	stay	pedestrians_vs_single_pedestrian	2v1
5928	female	yes	car_occupant	more than 10 years	18-29	2	observer	human	sidewalk	stay	swerve	pedestrians_vs_single_pedestrian	1v1
5928	female	yes	car_occupant	more than 10 years	18-29	2	observer	human	road	swerve	stay	pedestrians_vs_single_pedestrian	4v1
5928	female	yes	car_occupant	more than 10 years	18-29	2	observer	human	road	swerve	stay	pedestrians_vs_single_pedestrian	2v1
5928	female	yes	car_occupant	more than 10 years	18-29	2	observer	human	sidewalk	swerve	stay	pedestrians_vs_single_pedestrian	4v1
5928	female	yes	car_occupant	more than 10 years	18-29	2	observer	human	road	swerve	swerve	pedestrians_vs_single_pedestrian	1v1
5928	female	yes	car_occupant	more than 10 years	18-29	2	observer	human	sidewalk	swerve	stay	pedestrians_vs_single_pedestrian	3v1
5932	female	yes	car_occupant	more than 10 years	18-29	2	car_occupant	human	road	swerve	stay	pedestrians_vs_single_pedestrian	4v1
5932	female	yes	car_occupant	more than 10 years	18-29	2	car_occupant	human	sidewalk	swerve	swerve	pedestrians_vs_single_pedestrian	4v1
5932	female	yes	car_occupant	more than 10 years	18-29	2	car_occupant	human	sidewalk	stay	swerve	pedestrians_vs_single_pedestrian	1v1
5932	female	yes	car_occupant	more than 10 years	18-29	2	car_occupant	human	road	swerve	swerve	pedestrians_vs_single_pedestrian	2v1
5932	female	yes	car_occupant	more than 10 years	18-29	2	car_occupant	human	road	swerve	stay	pedestrians_vs_single_pedestrian	3v1
5932	female	yes	car_occupant	more than 10 years	18-29	2	car_occupant	human	sidewalk	swerve	swerve	pedestrians_vs_single_pedestrian	2v1
5932	female	yes	car_occupant	more than 10 years	18-29	2	car_occupant	human	sidewalk	swerve	stay	pedestrians_vs_single_pedestrian	3v1
5932	female	yes	car_occupant	more than 10 years	18-29	2	car_occupant	human	road	stay	stay	pedestrians_vs_single_pedestrian	1v1
5952	male	yes	pedestrian	less than 5 years	30-39	3	pedestrian_front	human	sidewalk	swerve	swerve	pedestrians_vs_single_pedestrian	3v1
5952	male	yes	pedestrian	less than 5 years	30-39	3	pedestrian_front	human	road	swerve	stay	pedestrians_vs_single_pedestrian	4v1
5952	male	yes	pedestrian	less than 5 years	30-39	3	pedestrian_front	human	road	swerve	stay	pedestrians_vs_single_pedestrian	1v1
5952	male	yes	pedestrian	less than 5 years	30-39	3	pedestrian_front	human	road	swerve	stay	pedestrians_vs_single_pedestrian	3v1
5952	male	yes	pedestrian	less than 5 years	30-39	3	pedestrian_front	human	sidewalk	swerve	stay	pedestrians_vs_single_pedestrian	4v1
5952	male	yes	pedestrian	less than 5 years	30-39	3	pedestrian_front	human	road	stay	swerve	pedestrians_vs_single_pedestrian	2v1
5952	male	yes	pedestrian	less than 5 years	30-39	3	pedestrian_front	human	sidewalk	stay	swerve	pedestrians_vs_single_pedestrian	2v1
5952	male	yes	pedestrian	less than 5 years	30-39	3	pedestrian_front	human	sidewalk	swerve	swerve	pedestrians_vs_single_pedestrian	1v1
5958	male	yes	car_occupant	more than 10 years	30-39	4	car_occupant	self-driving	sidewalk	stay	swerve	pedestrians_vs_single_pedestrian	4v1
5958	male	yes	car_occupant	more than 10 years	30-39	4	car_occupant	self-driving	sidewalk	stay	stay	pedestrians_vs_single_pedestrian	2v1
5958	male	yes	car_occupant	more than 10 years	30-39	4	car_occupant	self-driving	sidewalk	stay	swerve	pedestrians_vs_single_pedestrian	3v1
5958	male	yes	car_occupant	more than 10 years	30-39	4	car_occupant	self-driving	sidewalk	stay	swerve	pedestrians_vs_single_pedestrian	1v1
5958	male	yes	car_occupant	more than 10 years	30-39	4	car_occupant	self-driving	road	stay	swerve	pedestrians_vs_single_pedestrian	1v1
5958	male	yes	car_occupant	more than 10 years	30-39	4	car_occupant	self-driving	road	stay	swerve	pedestrians_vs_single_pedestrian	4v1
5958	male	yes	car_occupant	more than 10 years	30-39	4	car_occupant	self-driving	road	stay	stay	pedestrians_vs_single_pedestrian	3v1
5958	male	yes	car_occupant	more than 10 years	30-39	4	car_occupant	self-driving	road	stay	stay	pedestrians_vs_single_pedestrian	2v1
5962	male	yes	pedestrian	more than 10 years	60-69	4	observer	self-driving	road	swerve	swerve	pedestrians_vs_single_pedestrian	1v1
5962	male	yes	pedestrian	more than 10 years	60-69	4	observer	self-driving	road	swerve	stay	pedestrians_vs_single_pedestrian	3v1
5962	male	yes	pedestrian	more than 10 years	60-69	4	observer	self-driving	road	swerve	stay	pedestrians_vs_single_pedestrian	2v1
5962	male	yes	pedestrian	more than 10 years	60-69	4	observer	self-driving	sidewalk	swerve	swerve	pedestrians_vs_single_pedestrian	3v1
5962	male	yes	pedestrian	more than 10 years	60-69	4	observer	self-driving	sidewalk	stay	stay	pedestrians_vs_single_pedestrian	1v1
5962	male	yes	pedestrian	more than 10 years	60-69	4	observer	self-driving	sidewalk	swerve	stay	pedestrians_vs_single_pedestrian	4v1
5962	male	yes	pedestrian	more than 10 years	60-69	4	observer	self-driving	sidewalk	swerve	stay	pedestrians_vs_single_pedestrian	2v1
5962	male	yes	pedestrian	more than 10 years	60-69	4	observer	self-driving	road	swerve	stay	pedestrians_vs_single_pedestrian	4v1
5969	female	yes	pedestrian	6 to 10 years	30-39	4	pedestrian_side	human	sidewalk	swerve	stay	pedestrians_vs_single_pedestrian	3v1
5969	female	yes	pedestrian	6 to 10 years	30-39	4	pedestrian_side	human	sidewalk	swerve	stay	pedestrians_vs_single_pedestrian	1v1
5969	female	yes	pedestrian	6 to 10 years	30-39	4	pedestrian_side	human	road	swerve	swerve	pedestrians_vs_single_pedestrian	3v1
5969	female	yes	pedestrian	6 to 10 years	30-39	4	pedestrian_side	human	sidewalk	swerve	stay	pedestrians_vs_single_pedestrian	4v1
5969	female	yes	pedestrian	6 to 10 years	30-39	4	pedestrian_side	human	sidewalk	stay	swerve	pedestrians_vs_single_pedestrian	2v1
5969	female	yes	pedestrian	6 to 10 years	30-39	4	pedestrian_side	human	road	stay	swerve	pedestrians_vs_single_pedestrian	1v1
5969	female	yes	pedestrian	6 to 10 years	30-39	4	pedestrian_side	human	road	swerve	swerve	pedestrians_vs_single_pedestrian	2v1
5969	female	yes	pedestrian	6 to 10 years	30-39	4	pedestrian_side	human	road	swerve	stay	pedestrians_vs_single_pedestrian	4v1
6018	female	yes	pedestrian	less than 5 years	18-29	3	pedestrian_front	self-driving	sidewalk	swerve	swerve	pedestrians_vs_single_pedestrian	4v1
6018	female	yes	pedestrian	less than 5 years	18-29	3	pedestrian_front	self-driving	road	swerve	swerve	pedestrians_vs_single_pedestrian	4v1
6018	female	yes	pedestrian	less than 5 years	18-29	3	pedestrian_front	self-driving	road	swerve	stay	pedestrians_vs_single_pedestrian	2v1
6018	female	yes	pedestrian	less than 5 years	18-29	3	pedestrian_front	self-driving	sidewalk	swerve	stay	pedestrians_vs_single_pedestrian	2v1
6018	female	yes	pedestrian	less than 5 years	18-29	3	pedestrian_front	self-driving	road	swerve	swerve	pedestrians_vs_single_pedestrian	1v1
6018	female	yes	pedestrian	less than 5 years	18-29	3	pedestrian_front	self-driving	sidewalk	swerve	stay	pedestrians_vs_single_pedestrian	3v1
6018	female	yes	pedestrian	less than 5 years	18-29	3	pedestrian_front	self-driving	sidewalk	swerve	stay	pedestrians_vs_single_pedestrian	1v1
6018	female	yes	pedestrian	less than 5 years	18-29	3	pedestrian_front	self-driving	road	swerve	swerve	pedestrians_vs_single_pedestrian	3v1
6022	female	no	pedestrian	none	18-29	5	pedestrian_side	self-driving	road	stay	swerve	pedestrians_vs_single_pedestrian	3v1
6022	female	no	pedestrian	none	18-29	5	pedestrian_side	self-driving	road	stay	stay	pedestrians_vs_single_pedestrian	2v1
6022	female	no	pedestrian	none	18-29	5	pedestrian_side	self-driving	road	stay	swerve	pedestrians_vs_single_pedestrian	1v1
6022	female	no	pedestrian	none	18-29	5	pedestrian_side	self-driving	sidewalk	swerve	swerve	pedestrians_vs_single_pedestrian	1v1
6022	female	no	pedestrian	none	18-29	5	pedestrian_side	self-driving	road	swerve	stay	pedestrians_vs_single_pedestrian	4v1
6022	female	no	pedestrian	none	18-29	5	pedestrian_side	self-driving	sidewalk	swerve	stay	pedestrians_vs_single_pedestrian	2v1
6022	female	no	pedestrian	none	18-29	5	pedestrian_side	self-driving	sidewalk	stay	stay	pedestrians_vs_single_pedestrian	3v1
6022	female	no	pedestrian	none	18-29	5	pedestrian_side	self-driving	sidewalk	swerve	swerve	pedestrians_vs_single_pedestrian	4v1
6027	female	no	pedestrian	less than 5 years	18-29	5	observer	human	road	swerve	stay	pedestrians_vs_single_pedestrian	4v1
6027	female	no	pedestrian	less than 5 years	18-29	5	observer	human	sidewalk	swerve	swerve	pedestrians_vs_single_pedestrian	3v1
6027	female	no	pedestrian	less than 5 years	18-29	5	observer	human	road	stay	stay	pedestrians_vs_single_pedestrian	2v1
6027	female	no	pedestrian	less than 5 years	18-29	5	observer	human	sidewalk	stay	stay	pedestrians_vs_single_pedestrian	4v1
6027	female	no	pedestrian	less than 5 years	18-29	5	observer	human	sidewalk	stay	stay	pedestrians_vs_single_pedestrian	1v1
6027	female	no	pedestrian	less than 5 years	18-29	5	observer	human	road	stay	stay	pedestrians_vs_single_pedestrian	3v1
6027	female	no	pedestrian	less than 5 years	18-29	5	observer	human	road	swerve	swerve	pedestrians_vs_single_pedestrian	1v1
6027	female	no	pedestrian	less than 5 years	18-29	5	observer	human	sidewalk	swerve	swerve	pedestrians_vs_single_pedestrian	2v1
6028	male	yes	pedestrian	less than 5 years	18-29	4	pedestrian_front	human	sidewalk	stay	stay	pedestrians_vs_single_pedestrian	2v1
6028	male	yes	pedestrian	less than 5 years	18-29	4	pedestrian_front	human	sidewalk	swerve	stay	pedestrians_vs_single_pedestrian	4v1
6028	male	yes	pedestrian	less than 5 years	18-29	4	pedestrian_front	human	road	swerve	stay	pedestrians_vs_single_pedestrian	4v1
6028	male	yes	pedestrian	less than 5 years	18-29	4	pedestrian_front	human	road	swerve	stay	pedestrians_vs_single_pedestrian	3v1
6028	male	yes	pedestrian	less than 5 years	18-29	4	pedestrian_front	human	sidewalk	swerve	stay	pedestrians_vs_single_pedestrian	1v1
6028	male	yes	pedestrian	less than 5 years	18-29	4	pedestrian_front	human	sidewalk	swerve	swerve	pedestrians_vs_single_pedestrian	3v1
6028	male	yes	pedestrian	less than 5 years	18-29	4	pedestrian_front	human	road	swerve	swerve	pedestrians_vs_single_pedestrian	2v1
6028	male	yes	pedestrian	less than 5 years	18-29	4	pedestrian_front	human	road	swerve	swerve	pedestrians_vs_single_pedestrian	1v1
6045	female	yes	car_occupant	6 to 10 years	18-29	4	observer	self-driving	sidewalk	stay	stay	pedestrians_vs_single_pedestrian	3v1
6045	female	yes	car_occupant	6 to 10 years	18-29	4	observer	self-driving	sidewalk	swerve	stay	pedestrians_vs_single_pedestrian	4v1
6045	female	yes	car_occupant	6 to 10 years	18-29	4	observer	self-driving	sidewalk	swerve	stay	pedestrians_vs_single_pedestrian	2v1
6045	female	yes	car_occupant	6 to 10 years	18-29	4	observer	self-driving	road	swerve	swerve	pedestrians_vs_single_pedestrian	2v1
6045	female	yes	car_occupant	6 to 10 years	18-29	4	observer	self-driving	road	swerve	swerve	pedestrians_vs_single_pedestrian	4v1
6045	female	yes	car_occupant	6 to 10 years	18-29	4	observer	self-driving	road	swerve	stay	pedestrians_vs_single_pedestrian	3v1
6045	female	yes	car_occupant	6 to 10 years	18-29	4	observer	self-driving	road	stay	stay	pedestrians_vs_single_pedestrian	1v1
6045	female	yes	car_occupant	6 to 10 years	18-29	4	observer	self-driving	sidewalk	stay	swerve	pedestrians_vs_single_pedestrian	1v1
6050	male	yes	car_occupant	less than 5 years	18-29	1	car_occupant	human	sidewalk	swerve	swerve	pedestrians_vs_single_pedestrian	3v1
6050	male	yes	car_occupant	less than 5 years	18-29	1	car_occupant	human	sidewalk	swerve	stay	pedestrians_vs_single_pedestrian	2v1
6050	male	yes	car_occupant	less than 5 years	18-29	1	car_occupant	human	sidewalk	swerve	stay	pedestrians_vs_single_pedestrian	4v1
6050	male	yes	car_occupant	less than 5 years	18-29	1	car_occupant	human	road	stay	swerve	pedestrians_vs_single_pedestrian	1v1
6050	male	yes	car_occupant	less than 5 years	18-29	1	car_occupant	human	sidewalk	stay	stay	pedestrians_vs_single_pedestrian	1v1
6050	male	yes	car_occupant	less than 5 years	18-29	1	car_occupant	human	road	swerve	swerve	pedestrians_vs_single_pedestrian	2v1
6050	male	yes	car_occupant	less than 5 years	18-29	1	car_occupant	human	road	swerve	stay	pedestrians_vs_single_pedestrian	3v1
6050	male	yes	car_occupant	less than 5 years	18-29	1	car_occupant	human	road	swerve	swerve	pedestrians_vs_single_pedestrian	4v1
6052	female	yes	car_occupant	less than 5 years	18-29	3	pedestrian_side	human	sidewalk	stay	stay	pedestrians_vs_single_pedestrian	1v1
6052	female	yes	car_occupant	less than 5 years	18-29	3	pedestrian_side	human	road	stay	stay	pedestrians_vs_single_pedestrian	2v1
6052	female	yes	car_occupant	less than 5 years	18-29	3	pedestrian_side	human	road	swerve	swerve	pedestrians_vs_single_pedestrian	3v1
6052	female	yes	car_occupant	less than 5 years	18-29	3	pedestrian_side	human	road	swerve	stay	pedestrians_vs_single_pedestrian	4v1
6052	female	yes	car_occupant	less than 5 years	18-29	3	pedestrian_side	human	road	stay	swerve	pedestrians_vs_single_pedestrian	1v1
6052	female	yes	car_occupant	less than 5 years	18-29	3	pedestrian_side	human	sidewalk	stay	swerve	pedestrians_vs_single_pedestrian	4v1
6052	female	yes	car_occupant	less than 5 years	18-29	3	pedestrian_side	human	sidewalk	swerve	stay	pedestrians_vs_single_pedestrian	3v1
6052	female	yes	car_occupant	less than 5 years	18-29	3	pedestrian_side	human	sidewalk	swerve	swerve	pedestrians_vs_single_pedestrian	2v1
6053	male	yes	car_occupant	less than 5 years	18-29	2	car_occupant	human	sidewalk	swerve	stay	pedestrians_vs_single_pedestrian	4v1
6053	male	yes	car_occupant	less than 5 years	18-29	2	car_occupant	human	sidewalk	swerve	stay	pedestrians_vs_single_pedestrian	2v1
6053	male	yes	car_occupant	less than 5 years	18-29	2	car_occupant	human	road	swerve	stay	pedestrians_vs_single_pedestrian	2v1
6053	male	yes	car_occupant	less than 5 years	18-29	2	car_occupant	human	road	stay	swerve	pedestrians_vs_single_pedestrian	1v1
6053	male	yes	car_occupant	less than 5 years	18-29	2	car_occupant	human	sidewalk	stay	swerve	pedestrians_vs_single_pedestrian	1v1
6053	male	yes	car_occupant	less than 5 years	18-29	2	car_occupant	human	sidewalk	swerve	swerve	pedestrians_vs_single_pedestrian	3v1
6053	male	yes	car_occupant	less than 5 years	18-29	2	car_occupant	human	road	swerve	swerve	pedestrians_vs_single_pedestrian	3v1
6053	male	yes	car_occupant	less than 5 years	18-29	2	car_occupant	human	road	swerve	swerve	pedestrians_vs_single_pedestrian	4v1
6054	male	yes	pedestrian	less than 5 years	18-29	4	pedestrian_side	self-driving	road	swerve	stay	pedestrians_vs_single_pedestrian	1v1
6054	male	yes	pedestrian	less than 5 years	18-29	4	pedestrian_side	self-driving	sidewalk	swerve	swerve	pedestrians_vs_single_pedestrian	4v1
6054	male	yes	pedestrian	less than 5 years	18-29	4	pedestrian_side	self-driving	sidewalk	swerve	swerve	pedestrians_vs_single_pedestrian	1v1
6054	male	yes	pedestrian	less than 5 years	18-29	4	pedestrian_side	self-driving	road	swerve	swerve	pedestrians_vs_single_pedestrian	2v1
6054	male	yes	pedestrian	less than 5 years	18-29	4	pedestrian_side	self-driving	road	swerve	swerve	pedestrians_vs_single_pedestrian	4v1
6054	male	yes	pedestrian	less than 5 years	18-29	4	pedestrian_side	self-driving	sidewalk	swerve	stay	pedestrians_vs_single_pedestrian	2v1
6054	male	yes	pedestrian	less than 5 years	18-29	4	pedestrian_side	self-driving	road	swerve	stay	pedestrians_vs_single_pedestrian	3v1
6054	male	yes	pedestrian	less than 5 years	18-29	4	pedestrian_side	self-driving	sidewalk	swerve	stay	pedestrians_vs_single_pedestrian	3v1
6055	male	yes	car_occupant	less than 5 years	18-29	4	observer	human	sidewalk	swerve	swerve	pedestrians_vs_single_pedestrian	2v1
6055	male	yes	car_occupant	less than 5 years	18-29	4	observer	human	road	swerve	stay	pedestrians_vs_single_pedestrian	2v1
6055	male	yes	car_occupant	less than 5 years	18-29	4	observer	human	road	stay	swerve	pedestrians_vs_single_pedestrian	1v1
6055	male	yes	car_occupant	less than 5 years	18-29	4	observer	human	sidewalk	swerve	stay	pedestrians_vs_single_pedestrian	3v1
6055	male	yes	car_occupant	less than 5 years	18-29	4	observer	human	sidewalk	swerve	stay	pedestrians_vs_single_pedestrian	4v1
6055	male	yes	car_occupant	less than 5 years	18-29	4	observer	human	road	swerve	stay	pedestrians_vs_single_pedestrian	4v1
6055	male	yes	car_occupant	less than 5 years	18-29	4	observer	human	sidewalk	stay	stay	pedestrians_vs_single_pedestrian	1v1
6055	male	yes	car_occupant	less than 5 years	18-29	4	observer	human	road	swerve	swerve	pedestrians_vs_single_pedestrian	3v1
6056	male	yes	pedestrian	less than 5 years	18-29	3	pedestrian_front	self-driving	road	swerve	stay	pedestrians_vs_single_pedestrian	4v1
6056	male	yes	pedestrian	less than 5 years	18-29	3	pedestrian_front	self-driving	road	stay	swerve	pedestrians_vs_single_pedestrian	1v1
6056	male	yes	pedestrian	less than 5 years	18-29	3	pedestrian_front	self-driving	road	swerve	swerve	pedestrians_vs_single_pedestrian	3v1
6056	male	yes	pedestrian	less than 5 years	18-29	3	pedestrian_front	self-driving	road	swerve	swerve	pedestrians_vs_single_pedestrian	2v1
6056	male	yes	pedestrian	less than 5 years	18-29	3	pedestrian_front	self-driving	sidewalk	swerve	stay	pedestrians_vs_single_pedestrian	2v1
6056	male	yes	pedestrian	less than 5 years	18-29	3	pedestrian_front	self-driving	sidewalk	swerve	stay	pedestrians_vs_single_pedestrian	4v1
6056	male	yes	pedestrian	less than 5 years	18-29	3	pedestrian_front	self-driving	sidewalk	stay	stay	pedestrians_vs_single_pedestrian	1v1
6056	male	yes	pedestrian	less than 5 years	18-29	3	pedestrian_front	self-driving	sidewalk	swerve	stay	pedestrians_vs_single_pedestrian	3v1
6058	female	yes	pedestrian	less than 5 years	18-29	2	observer	self-driving	sidewalk	swerve	stay	pedestrians_vs_single_pedestrian	3v1
6058	female	yes	pedestrian	less than 5 years	18-29	2	observer	self-driving	sidewalk	swerve	swerve	pedestrians_vs_single_pedestrian	2v1
6058	female	yes	pedestrian	less than 5 years	18-29	2	observer	self-driving	sidewalk	stay	swerve	pedestrians_vs_single_pedestrian	1v1
6058	female	yes	pedestrian	less than 5 years	18-29	2	observer	self-driving	road	swerve	stay	pedestrians_vs_single_pedestrian	2v1
6058	female	yes	pedestrian	less than 5 years	18-29	2	observer	self-driving	road	swerve	stay	pedestrians_vs_single_pedestrian	3v1
6058	female	yes	pedestrian	less than 5 years	18-29	2	observer	self-driving	sidewalk	swerve	swerve	pedestrians_vs_single_pedestrian	4v1
6058	female	yes	pedestrian	less than 5 years	18-29	2	observer	self-driving	road	swerve	stay	pedestrians_vs_single_pedestrian	4v1
6058	female	yes	pedestrian	less than 5 years	18-29	2	observer	self-driving	road	stay	swerve	pedestrians_vs_single_pedestrian	1v1
6059	male	yes	pedestrian	less than 5 years	18-29	5	pedestrian_front	human	road	swerve	stay	pedestrians_vs_single_pedestrian	1v1
6059	male	yes	pedestrian	less than 5 years	18-29	5	pedestrian_front	human	road	swerve	swerve	pedestrians_vs_single_pedestrian	4v1
6059	male	yes	pedestrian	less than 5 years	18-29	5	pedestrian_front	human	sidewalk	swerve	stay	pedestrians_vs_single_pedestrian	4v1
6059	male	yes	pedestrian	less than 5 years	18-29	5	pedestrian_front	human	sidewalk	swerve	stay	pedestrians_vs_single_pedestrian	3v1
6059	male	yes	pedestrian	less than 5 years	18-29	5	pedestrian_front	human	road	swerve	swerve	pedestrians_vs_single_pedestrian	3v1
6059	male	yes	pedestrian	less than 5 years	18-29	5	pedestrian_front	human	sidewalk	swerve	swerve	pedestrians_vs_single_pedestrian	1v1
6059	male	yes	pedestrian	less than 5 years	18-29	5	pedestrian_front	human	sidewalk	swerve	swerve	pedestrians_vs_single_pedestrian	2v1
6059	male	yes	pedestrian	less than 5 years	18-29	5	pedestrian_front	human	road	swerve	swerve	pedestrians_vs_single_pedestrian	2v1
6060	female	yes	pedestrian	less than 5 years	18-29	3	pedestrian_front	human	road	swerve	stay	pedestrians_vs_single_pedestrian	4v1
6060	female	yes	pedestrian	less than 5 years	18-29	3	pedestrian_front	human	sidewalk	swerve	stay	pedestrians_vs_single_pedestrian	4v1
6060	female	yes	pedestrian	less than 5 years	18-29	3	pedestrian_front	human	road	stay	swerve	pedestrians_vs_single_pedestrian	2v1
6060	female	yes	pedestrian	less than 5 years	18-29	3	pedestrian_front	human	road	swerve	swerve	pedestrians_vs_single_pedestrian	1v1
6060	female	yes	pedestrian	less than 5 years	18-29	3	pedestrian_front	human	sidewalk	swerve	stay	pedestrians_vs_single_pedestrian	1v1
6060	female	yes	pedestrian	less than 5 years	18-29	3	pedestrian_front	human	sidewalk	swerve	stay	pedestrians_vs_single_pedestrian	2v1
6060	female	yes	pedestrian	less than 5 years	18-29	3	pedestrian_front	human	road	swerve	stay	pedestrians_vs_single_pedestrian	3v1
6060	female	yes	pedestrian	less than 5 years	18-29	3	pedestrian_front	human	sidewalk	swerve	swerve	pedestrians_vs_single_pedestrian	3v1
6097	male	yes	pedestrian	less than 5 years	18-29	3	pedestrian_side	self-driving	sidewalk	swerve	stay	pedestrians_vs_single_pedestrian	3v1
6097	male	yes	pedestrian	less than 5 years	18-29	3	pedestrian_side	self-driving	road	swerve	swerve	pedestrians_vs_single_pedestrian	3v1
6097	male	yes	pedestrian	less than 5 years	18-29	3	pedestrian_side	self-driving	road	stay	stay	pedestrians_vs_single_pedestrian	1v1
6097	male	yes	pedestrian	less than 5 years	18-29	3	pedestrian_side	self-driving	sidewalk	swerve	swerve	pedestrians_vs_single_pedestrian	2v1
6097	male	yes	pedestrian	less than 5 years	18-29	3	pedestrian_side	self-driving	sidewalk	swerve	swerve	pedestrians_vs_single_pedestrian	4v1
6097	male	yes	pedestrian	less than 5 years	18-29	3	pedestrian_side	self-driving	road	swerve	stay	pedestrians_vs_single_pedestrian	4v1
6097	male	yes	pedestrian	less than 5 years	18-29	3	pedestrian_side	self-driving	road	swerve	swerve	pedestrians_vs_single_pedestrian	2v1
6097	male	yes	pedestrian	less than 5 years	18-29	3	pedestrian_side	self-driving	sidewalk	stay	stay	pedestrians_vs_single_pedestrian	1v1
6098	female	yes	car_occupant	more than 10 years	18-29	5	car_occupant	self-driving	sidewalk	stay	swerve	pedestrians_vs_single_pedestrian	1v1
6098	female	yes	car_occupant	more than 10 years	18-29	5	car_occupant	self-driving	sidewalk	swerve	stay	pedestrians_vs_single_pedestrian	3v1
6098	female	yes	car_occupant	more than 10 years	18-29	5	car_occupant	self-driving	sidewalk	swerve	stay	pedestrians_vs_single_pedestrian	4v1
6098	female	yes	car_occupant	more than 10 years	18-29	5	car_occupant	self-driving	road	swerve	swerve	pedestrians_vs_single_pedestrian	2v1
6098	female	yes	car_occupant	more than 10 years	18-29	5	car_occupant	self-driving	sidewalk	swerve	swerve	pedestrians_vs_single_pedestrian	2v1
6098	female	yes	car_occupant	more than 10 years	18-29	5	car_occupant	self-driving	road	swerve	stay	pedestrians_vs_single_pedestrian	4v1
6098	female	yes	car_occupant	more than 10 years	18-29	5	car_occupant	self-driving	road	swerve	swerve	pedestrians_vs_single_pedestrian	3v1
6098	female	yes	car_occupant	more than 10 years	18-29	5	car_occupant	self-driving	road	swerve	swerve	pedestrians_vs_single_pedestrian	1v1
6101	male	no	car_occupant	less than 5 years	18-29	5	observer	human	sidewalk	swerve	stay	pedestrians_vs_single_pedestrian	1v1
6101	male	no	car_occupant	less than 5 years	18-29	5	observer	human	road	swerve	stay	pedestrians_vs_single_pedestrian	3v1
6101	male	no	car_occupant	less than 5 years	18-29	5	observer	human	sidewalk	swerve	stay	pedestrians_vs_single_pedestrian	4v1
6101	male	no	car_occupant	less than 5 years	18-29	5	observer	human	sidewalk	swerve	swerve	pedestrians_vs_single_pedestrian	3v1
6101	male	no	car_occupant	less than 5 years	18-29	5	observer	human	sidewalk	swerve	stay	pedestrians_vs_single_pedestrian	2v1
6101	male	no	car_occupant	less than 5 years	18-29	5	observer	human	road	stay	swerve	pedestrians_vs_single_pedestrian	1v1
6101	male	no	car_occupant	less than 5 years	18-29	5	observer	human	road	swerve	swerve	pedestrians_vs_single_pedestrian	4v1
6101	male	no	car_occupant	less than 5 years	18-29	5	observer	human	road	swerve	swerve	pedestrians_vs_single_pedestrian	2v1
6115	male	no	car_occupant	none	18-29	3	pedestrian_side	human	road	swerve	stay	pedestrians_vs_single_pedestrian	4v1
6115	male	no	car_occupant	none	18-29	3	pedestrian_side	human	sidewalk	stay	stay	pedestrians_vs_single_pedestrian	2v1
6115	male	no	car_occupant	none	18-29	3	pedestrian_side	human	road	swerve	swerve	pedestrians_vs_single_pedestrian	1v1
6115	male	no	car_occupant	none	18-29	3	pedestrian_side	human	sidewalk	stay	stay	pedestrians_vs_single_pedestrian	3v1
6115	male	no	car_occupant	none	18-29	3	pedestrian_side	human	road	swerve	stay	pedestrians_vs_single_pedestrian	2v1
6115	male	no	car_occupant	none	18-29	3	pedestrian_side	human	road	stay	swerve	pedestrians_vs_single_pedestrian	3v1
6115	male	no	car_occupant	none	18-29	3	pedestrian_side	human	sidewalk	stay	swerve	pedestrians_vs_single_pedestrian	1v1
6115	male	no	car_occupant	none	18-29	3	pedestrian_side	human	sidewalk	stay	swerve	pedestrians_vs_single_pedestrian	4v1
6118	male	yes	pedestrian	less than 5 years	18-29	5	pedestrian_side	human	road	stay	swerve	pedestrians_vs_single_pedestrian	2v1
6118	male	yes	pedestrian	less than 5 years	18-29	5	pedestrian_side	human	road	stay	stay	pedestrians_vs_single_pedestrian	4v1
6118	male	yes	pedestrian	less than 5 years	18-29	5	pedestrian_side	human	sidewalk	stay	swerve	pedestrians_vs_single_pedestrian	1v1
6118	male	yes	pedestrian	less than 5 years	18-29	5	pedestrian_side	human	road	stay	stay	pedestrians_vs_single_pedestrian	3v1
6118	male	yes	pedestrian	less than 5 years	18-29	5	pedestrian_side	human	sidewalk	stay	swerve	pedestrians_vs_single_pedestrian	3v1
6118	male	yes	pedestrian	less than 5 years	18-29	5	pedestrian_side	human	road	stay	stay	pedestrians_vs_single_pedestrian	1v1
6118	male	yes	pedestrian	less than 5 years	18-29	5	pedestrian_side	human	sidewalk	stay	swerve	pedestrians_vs_single_pedestrian	4v1
6118	male	yes	pedestrian	less than 5 years	18-29	5	pedestrian_side	human	sidewalk	stay	stay	pedestrians_vs_single_pedestrian	2v1
6121	female	yes	pedestrian	less than 5 years	18-29	2	pedestrian_side	human	sidewalk	stay	swerve	pedestrians_vs_single_pedestrian	2v1
6121	female	yes	pedestrian	less than 5 years	18-29	2	pedestrian_side	human	road	stay	stay	pedestrians_vs_single_pedestrian	2v1
6121	female	yes	pedestrian	less than 5 years	18-29	2	pedestrian_side	human	road	swerve	stay	pedestrians_vs_single_pedestrian	4v1
6121	female	yes	pedestrian	less than 5 years	18-29	2	pedestrian_side	human	sidewalk	swerve	swerve	pedestrians_vs_single_pedestrian	3v1
6121	female	yes	pedestrian	less than 5 years	18-29	2	pedestrian_side	human	road	swerve	swerve	pedestrians_vs_single_pedestrian	3v1
6121	female	yes	pedestrian	less than 5 years	18-29	2	pedestrian_side	human	sidewalk	swerve	swerve	pedestrians_vs_single_pedestrian	4v1
6121	female	yes	pedestrian	less than 5 years	18-29	2	pedestrian_side	human	sidewalk	stay	stay	pedestrians_vs_single_pedestrian	1v1
6121	female	yes	pedestrian	less than 5 years	18-29	2	pedestrian_side	human	road	stay	stay	pedestrians_vs_single_pedestrian	1v1
6122	male	yes	pedestrian	more than 10 years	30-39	4	pedestrian_side	human	road	stay	stay	pedestrians_vs_single_pedestrian	2v1
6122	male	yes	pedestrian	more than 10 years	30-39	4	pedestrian_side	human	sidewalk	stay	swerve	pedestrians_vs_single_pedestrian	3v1
6122	male	yes	pedestrian	more than 10 years	30-39	4	pedestrian_side	human	road	stay	swerve	pedestrians_vs_single_pedestrian	3v1
6122	male	yes	pedestrian	more than 10 years	30-39	4	pedestrian_side	human	sidewalk	stay	swerve	pedestrians_vs_single_pedestrian	4v1
6122	male	yes	pedestrian	more than 10 years	30-39	4	pedestrian_side	human	road	stay	swerve	pedestrians_vs_single_pedestrian	4v1
6122	male	yes	pedestrian	more than 10 years	30-39	4	pedestrian_side	human	sidewalk	stay	stay	pedestrians_vs_single_pedestrian	2v1
6122	male	yes	pedestrian	more than 10 years	30-39	4	pedestrian_side	human	road	stay	stay	pedestrians_vs_single_pedestrian	1v1
6122	male	yes	pedestrian	more than 10 years	30-39	4	pedestrian_side	human	sidewalk	stay	stay	pedestrians_vs_single_pedestrian	1v1
6126	male	yes	pedestrian	6 to 10 years	18-29	4	pedestrian_front	self-driving	sidewalk	swerve	stay	pedestrians_vs_single_pedestrian	2v1
6126	male	yes	pedestrian	6 to 10 years	18-29	4	pedestrian_front	self-driving	road	swerve	swerve	pedestrians_vs_single_pedestrian	4v1
6126	male	yes	pedestrian	6 to 10 years	18-29	4	pedestrian_front	self-driving	road	swerve	stay	pedestrians_vs_single_pedestrian	2v1
6126	male	yes	pedestrian	6 to 10 years	18-29	4	pedestrian_front	self-driving	sidewalk	swerve	swerve	pedestrians_vs_single_pedestrian	3v1
6126	male	yes	pedestrian	6 to 10 years	18-29	4	pedestrian_front	self-driving	road	stay	swerve	pedestrians_vs_single_pedestrian	1v1
6126	male	yes	pedestrian	6 to 10 years	18-29	4	pedestrian_front	self-driving	sidewalk	stay	swerve	pedestrians_vs_single_pedestrian	1v1
6126	male	yes	pedestrian	6 to 10 years	18-29	4	pedestrian_front	self-driving	road	swerve	stay	pedestrians_vs_single_pedestrian	3v1
6126	male	yes	pedestrian	6 to 10 years	18-29	4	pedestrian_front	self-driving	sidewalk	swerve	swerve	pedestrians_vs_single_pedestrian	4v1
6127	female	yes	car_occupant	less than 5 years	18-29	4	car_occupant	human	sidewalk	swerve	swerve	pedestrians_vs_single_pedestrian	4v1
6127	female	yes	car_occupant	less than 5 years	18-29	4	car_occupant	human	sidewalk	swerve	swerve	pedestrians_vs_single_pedestrian	3v1
6127	female	yes	car_occupant	less than 5 years	18-29	4	car_occupant	human	sidewalk	stay	stay	pedestrians_vs_single_pedestrian	1v1
6127	female	yes	car_occupant	less than 5 years	18-29	4	car_occupant	human	road	swerve	stay	pedestrians_vs_single_pedestrian	1v1
6127	female	yes	car_occupant	less than 5 years	18-29	4	car_occupant	human	road	swerve	swerve	pedestrians_vs_single_pedestrian	3v1
6127	female	yes	car_occupant	less than 5 years	18-29	4	car_occupant	human	road	swerve	stay	pedestrians_vs_single_pedestrian	4v1
6127	female	yes	car_occupant	less than 5 years	18-29	4	car_occupant	human	sidewalk	stay	swerve	pedestrians_vs_single_pedestrian	2v1
6127	female	yes	car_occupant	less than 5 years	18-29	4	car_occupant	human	road	swerve	swerve	pedestrians_vs_single_pedestrian	2v1
6137	female	yes	car_occupant	more than 10 years	40-49	3	observer	self-driving	road	stay	swerve	pedestrians_vs_single_pedestrian	1v1
6137	female	yes	car_occupant	more than 10 years	40-49	3	observer	self-driving	road	stay	stay	pedestrians_vs_single_pedestrian	2v1
6137	female	yes	car_occupant	more than 10 years	40-49	3	observer	self-driving	sidewalk	stay	swerve	pedestrians_vs_single_pedestrian	2v1
6137	female	yes	car_occupant	more than 10 years	40-49	3	observer	self-driving	road	swerve	swerve	pedestrians_vs_single_pedestrian	4v1
6137	female	yes	car_occupant	more than 10 years	40-49	3	observer	self-driving	sidewalk	swerve	stay	pedestrians_vs_single_pedestrian	4v1
6137	female	yes	car_occupant	more than 10 years	40-49	3	observer	self-driving	road	swerve	swerve	pedestrians_vs_single_pedestrian	3v1
6137	female	yes	car_occupant	more than 10 years	40-49	3	observer	self-driving	sidewalk	swerve	stay	pedestrians_vs_single_pedestrian	3v1
6137	female	yes	car_occupant	more than 10 years	40-49	3	observer	self-driving	sidewalk	stay	stay	pedestrians_vs_single_pedestrian	1v1
6158	male	yes	pedestrian	less than 5 years	18-29	5	pedestrian_side	self-driving	sidewalk	stay	stay	pedestrians_vs_single_pedestrian	4v1
6158	male	yes	pedestrian	less than 5 years	18-29	5	pedestrian_side	self-driving	sidewalk	stay	stay	pedestrians_vs_single_pedestrian	2v1
6158	male	yes	pedestrian	less than 5 years	18-29	5	pedestrian_side	self-driving	road	swerve	swerve	pedestrians_vs_single_pedestrian	2v1
6158	male	yes	pedestrian	less than 5 years	18-29	5	pedestrian_side	self-driving	road	swerve	swerve	pedestrians_vs_single_pedestrian	4v1
6158	male	yes	pedestrian	less than 5 years	18-29	5	pedestrian_side	self-driving	road	stay	stay	pedestrians_vs_single_pedestrian	3v1
6158	male	yes	pedestrian	less than 5 years	18-29	5	pedestrian_side	self-driving	sidewalk	stay	swerve	pedestrians_vs_single_pedestrian	1v1
6158	male	yes	pedestrian	less than 5 years	18-29	5	pedestrian_side	self-driving	sidewalk	stay	stay	pedestrians_vs_single_pedestrian	3v1
6158	male	yes	pedestrian	less than 5 years	18-29	5	pedestrian_side	self-driving	road	swerve	swerve	pedestrians_vs_single_pedestrian	1v1
6160	male	yes	car_occupant	more than 10 years	30-39	4	car_occupant	self-driving	sidewalk	stay	swerve	pedestrians_vs_single_pedestrian	1v1
6160	male	yes	car_occupant	more than 10 years	30-39	4	car_occupant	self-driving	road	swerve	stay	pedestrians_vs_single_pedestrian	2v1
6160	male	yes	car_occupant	more than 10 years	30-39	4	car_occupant	self-driving	sidewalk	stay	stay	pedestrians_vs_single_pedestrian	2v1
6160	male	yes	car_occupant	more than 10 years	30-39	4	car_occupant	self-driving	road	swerve	swerve	pedestrians_vs_single_pedestrian	3v1
6160	male	yes	car_occupant	more than 10 years	30-39	4	car_occupant	self-driving	road	stay	stay	pedestrians_vs_single_pedestrian	1v1
6160	male	yes	car_occupant	more than 10 years	30-39	4	car_occupant	self-driving	sidewalk	swerve	stay	pedestrians_vs_single_pedestrian	3v1
6160	male	yes	car_occupant	more than 10 years	30-39	4	car_occupant	self-driving	road	swerve	swerve	pedestrians_vs_single_pedestrian	4v1
6160	male	yes	car_occupant	more than 10 years	30-39	4	car_occupant	self-driving	sidewalk	swerve	swerve	pedestrians_vs_single_pedestrian	4v1
6177	female	yes	pedestrian	6 to 10 years	18-29	2	pedestrian_front	human	sidewalk	stay	stay	pedestrians_vs_single_pedestrian	3v1
6177	female	yes	pedestrian	6 to 10 years	18-29	2	pedestrian_front	human	road	swerve	stay	pedestrians_vs_single_pedestrian	4v1
6177	female	yes	pedestrian	6 to 10 years	18-29	2	pedestrian_front	human	road	swerve	swerve	pedestrians_vs_single_pedestrian	3v1
6177	female	yes	pedestrian	6 to 10 years	18-29	2	pedestrian_front	human	sidewalk	stay	swerve	pedestrians_vs_single_pedestrian	4v1
6177	female	yes	pedestrian	6 to 10 years	18-29	2	pedestrian_front	human	sidewalk	stay	swerve	pedestrians_vs_single_pedestrian	1v1
6177	female	yes	pedestrian	6 to 10 years	18-29	2	pedestrian_front	human	road	stay	stay	pedestrians_vs_single_pedestrian	1v1
6177	female	yes	pedestrian	6 to 10 years	18-29	2	pedestrian_front	human	sidewalk	stay	swerve	pedestrians_vs_single_pedestrian	2v1
6177	female	yes	pedestrian	6 to 10 years	18-29	2	pedestrian_front	human	road	stay	swerve	pedestrians_vs_single_pedestrian	2v1
6188	female	no	car_occupant	none	18-29	2	observer	human	road	swerve	stay	pedestrians_vs_single_pedestrian	2v1
6188	female	no	car_occupant	none	18-29	2	observer	human	road	stay	stay	pedestrians_vs_single_pedestrian	1v1
6188	female	no	car_occupant	none	18-29	2	observer	human	road	swerve	swerve	pedestrians_vs_single_pedestrian	4v1
6188	female	no	car_occupant	none	18-29	2	observer	human	sidewalk	swerve	stay	pedestrians_vs_single_pedestrian	3v1
6188	female	no	car_occupant	none	18-29	2	observer	human	sidewalk	swerve	swerve	pedestrians_vs_single_pedestrian	4v1
6188	female	no	car_occupant	none	18-29	2	observer	human	sidewalk	stay	swerve	pedestrians_vs_single_pedestrian	1v1
6188	female	no	car_occupant	none	18-29	2	observer	human	road	swerve	stay	pedestrians_vs_single_pedestrian	3v1
6188	female	no	car_occupant	none	18-29	2	observer	human	sidewalk	swerve	swerve	pedestrians_vs_single_pedestrian	2v1
6198	male	yes	car_occupant	more than 10 years	60-69	5	car_occupant	human	road	swerve	stay	pedestrians_vs_single_pedestrian	3v1
6198	male	yes	car_occupant	more than 10 years	60-69	5	car_occupant	human	road	stay	stay	pedestrians_vs_single_pedestrian	1v1
6198	male	yes	car_occupant	more than 10 years	60-69	5	car_occupant	human	road	swerve	swerve	pedestrians_vs_single_pedestrian	4v1
6198	male	yes	car_occupant	more than 10 years	60-69	5	car_occupant	human	sidewalk	swerve	stay	pedestrians_vs_single_pedestrian	3v1
6198	male	yes	car_occupant	more than 10 years	60-69	5	car_occupant	human	sidewalk	swerve	swerve	pedestrians_vs_single_pedestrian	2v1
6198	male	yes	car_occupant	more than 10 years	60-69	5	car_occupant	human	road	swerve	stay	pedestrians_vs_single_pedestrian	2v1
6198	male	yes	car_occupant	more than 10 years	60-69	5	car_occupant	human	sidewalk	swerve	stay	pedestrians_vs_single_pedestrian	4v1
6198	male	yes	car_occupant	more than 10 years	60-69	5	car_occupant	human	sidewalk	stay	stay	pedestrians_vs_single_pedestrian	1v1
6199	female	yes	car_occupant	less than 5 years	18-29	3	car_occupant	self-driving	sidewalk	stay	stay	pedestrians_vs_single_pedestrian	1v1
6199	female	yes	car_occupant	less than 5 years	18-29	3	car_occupant	self-driving	sidewalk	swerve	stay	pedestrians_vs_single_pedestrian	3v1
6199	female	yes	car_occupant	less than 5 years	18-29	3	car_occupant	self-driving	road	stay	stay	pedestrians_vs_single_pedestrian	1v1
6199	female	yes	car_occupant	less than 5 years	18-29	3	car_occupant	self-driving	road	swerve	swerve	pedestrians_vs_single_pedestrian	3v1
6199	female	yes	car_occupant	less than 5 years	18-29	3	car_occupant	self-driving	sidewalk	stay	swerve	pedestrians_vs_single_pedestrian	2v1
6199	female	yes	car_occupant	less than 5 years	18-29	3	car_occupant	self-driving	road	swerve	swerve	pedestrians_vs_single_pedestrian	4v1
6199	female	yes	car_occupant	less than 5 years	18-29	3	car_occupant	self-driving	road	stay	stay	pedestrians_vs_single_pedestrian	2v1
6199	female	yes	car_occupant	less than 5 years	18-29	3	car_occupant	self-driving	sidewalk	stay	stay	pedestrians_vs_single_pedestrian	4v1
6201	male	yes	pedestrian	6 to 10 years	18-29	5	pedestrian_front	self-driving	sidewalk	swerve	stay	pedestrians_vs_single_pedestrian	3v1
6201	male	yes	pedestrian	6 to 10 years	18-29	5	pedestrian_front	self-driving	sidewalk	swerve	stay	pedestrians_vs_single_pedestrian	2v1
6201	male	yes	pedestrian	6 to 10 years	18-29	5	pedestrian_front	self-driving	sidewalk	swerve	swerve	pedestrians_vs_single_pedestrian	4v1
6201	male	yes	pedestrian	6 to 10 years	18-29	5	pedestrian_front	self-driving	road	swerve	stay	pedestrians_vs_single_pedestrian	4v1
6201	male	yes	pedestrian	6 to 10 years	18-29	5	pedestrian_front	self-driving	road	swerve	swerve	pedestrians_vs_single_pedestrian	1v1
6201	male	yes	pedestrian	6 to 10 years	18-29	5	pedestrian_front	self-driving	road	swerve	stay	pedestrians_vs_single_pedestrian	2v1
6201	male	yes	pedestrian	6 to 10 years	18-29	5	pedestrian_front	self-driving	sidewalk	swerve	swerve	pedestrians_vs_single_pedestrian	1v1
6201	male	yes	pedestrian	6 to 10 years	18-29	5	pedestrian_front	self-driving	road	swerve	stay	pedestrians_vs_single_pedestrian	3v1
6203	male	yes	pedestrian	more than 10 years	60-69	4	observer	self-driving	road	swerve	stay	pedestrians_vs_single_pedestrian	3v1
6203	male	yes	pedestrian	more than 10 years	60-69	4	observer	self-driving	road	stay	stay	pedestrians_vs_single_pedestrian	2v1
6203	male	yes	pedestrian	more than 10 years	60-69	4	observer	self-driving	sidewalk	swerve	swerve	pedestrians_vs_single_pedestrian	4v1
6203	male	yes	pedestrian	more than 10 years	60-69	4	observer	self-driving	road	swerve	swerve	pedestrians_vs_single_pedestrian	4v1
6203	male	yes	pedestrian	more than 10 years	60-69	4	observer	self-driving	sidewalk	stay	swerve	pedestrians_vs_single_pedestrian	1v1
6203	male	yes	pedestrian	more than 10 years	60-69	4	observer	self-driving	sidewalk	swerve	swerve	pedestrians_vs_single_pedestrian	3v1
6203	male	yes	pedestrian	more than 10 years	60-69	4	observer	self-driving	road	stay	swerve	pedestrians_vs_single_pedestrian	1v1
6203	male	yes	pedestrian	more than 10 years	60-69	4	observer	self-driving	sidewalk	swerve	stay	pedestrians_vs_single_pedestrian	2v1
6210	female	yes	pedestrian	more than 10 years	60-69	3	observer	self-driving	road	swerve	stay	pedestrians_vs_single_pedestrian	3v1
6210	female	yes	pedestrian	more than 10 years	60-69	3	observer	self-driving	sidewalk	stay	stay	pedestrians_vs_single_pedestrian	1v1
6210	female	yes	pedestrian	more than 10 years	60-69	3	observer	self-driving	road	swerve	stay	pedestrians_vs_single_pedestrian	4v1
6210	female	yes	pedestrian	more than 10 years	60-69	3	observer	self-driving	road	swerve	stay	pedestrians_vs_single_pedestrian	2v1
6210	female	yes	pedestrian	more than 10 years	60-69	3	observer	self-driving	sidewalk	swerve	swerve	pedestrians_vs_single_pedestrian	4v1
6210	female	yes	pedestrian	more than 10 years	60-69	3	observer	self-driving	sidewalk	swerve	swerve	pedestrians_vs_single_pedestrian	2v1
6210	female	yes	pedestrian	more than 10 years	60-69	3	observer	self-driving	road	swerve	stay	pedestrians_vs_single_pedestrian	1v1
6210	female	yes	pedestrian	more than 10 years	60-69	3	observer	self-driving	sidewalk	swerve	swerve	pedestrians_vs_single_pedestrian	3v1
6214	male	yes	pedestrian	more than 10 years	50-59	5	pedestrian_front	self-driving	sidewalk	stay	stay	pedestrians_vs_single_pedestrian	4v1
6214	male	yes	pedestrian	more than 10 years	50-59	5	pedestrian_front	self-driving	sidewalk	stay	stay	pedestrians_vs_single_pedestrian	3v1
6214	male	yes	pedestrian	more than 10 years	50-59	5	pedestrian_front	self-driving	sidewalk	stay	stay	pedestrians_vs_single_pedestrian	1v1
6214	male	yes	pedestrian	more than 10 years	50-59	5	pedestrian_front	self-driving	road	swerve	swerve	pedestrians_vs_single_pedestrian	4v1
6214	male	yes	pedestrian	more than 10 years	50-59	5	pedestrian_front	self-driving	road	swerve	stay	pedestrians_vs_single_pedestrian	1v1
6214	male	yes	pedestrian	more than 10 years	50-59	5	pedestrian_front	self-driving	road	swerve	stay	pedestrians_vs_single_pedestrian	2v1
6214	male	yes	pedestrian	more than 10 years	50-59	5	pedestrian_front	self-driving	sidewalk	stay	swerve	pedestrians_vs_single_pedestrian	2v1
6214	male	yes	pedestrian	more than 10 years	50-59	5	pedestrian_front	self-driving	road	swerve	swerve	pedestrians_vs_single_pedestrian	3v1
6254	female	yes	pedestrian	less than 5 years	18-29	4	pedestrian_side	self-driving	sidewalk	swerve	stay	pedestrians_vs_single_pedestrian	4v1
6254	female	yes	pedestrian	less than 5 years	18-29	4	pedestrian_side	self-driving	road	swerve	swerve	pedestrians_vs_single_pedestrian	3v1
6254	female	yes	pedestrian	less than 5 years	18-29	4	pedestrian_side	self-driving	road	stay	swerve	pedestrians_vs_single_pedestrian	1v1
6254	female	yes	pedestrian	less than 5 years	18-29	4	pedestrian_side	self-driving	road	swerve	stay	pedestrians_vs_single_pedestrian	4v1
6254	female	yes	pedestrian	less than 5 years	18-29	4	pedestrian_side	self-driving	sidewalk	swerve	stay	pedestrians_vs_single_pedestrian	2v1
6254	female	yes	pedestrian	less than 5 years	18-29	4	pedestrian_side	self-driving	road	swerve	swerve	pedestrians_vs_single_pedestrian	2v1
6254	female	yes	pedestrian	less than 5 years	18-29	4	pedestrian_side	self-driving	sidewalk	swerve	swerve	pedestrians_vs_single_pedestrian	3v1
6254	female	yes	pedestrian	less than 5 years	18-29	4	pedestrian_side	self-driving	sidewalk	stay	stay	pedestrians_vs_single_pedestrian	1v1
6257	male	yes	pedestrian	6 to 10 years	30-39	3	car_occupant	self-driving	road	swerve	swerve	pedestrians_vs_single_pedestrian	1v1
6257	male	yes	pedestrian	6 to 10 years	30-39	3	car_occupant	self-driving	sidewalk	swerve	stay	pedestrians_vs_single_pedestrian	4v1
6257	male	yes	pedestrian	6 to 10 years	30-39	3	car_occupant	self-driving	road	swerve	stay	pedestrians_vs_single_pedestrian	2v1
6257	male	yes	pedestrian	6 to 10 years	30-39	3	car_occupant	self-driving	sidewalk	swerve	swerve	pedestrians_vs_single_pedestrian	3v1
6257	male	yes	pedestrian	6 to 10 years	30-39	3	car_occupant	self-driving	road	swerve	swerve	pedestrians_vs_single_pedestrian	3v1
6257	male	yes	pedestrian	6 to 10 years	30-39	3	car_occupant	self-driving	road	swerve	stay	pedestrians_vs_single_pedestrian	4v1
6257	male	yes	pedestrian	6 to 10 years	30-39	3	car_occupant	self-driving	sidewalk	swerve	stay	pedestrians_vs_single_pedestrian	2v1
6257	male	yes	pedestrian	6 to 10 years	30-39	3	car_occupant	self-driving	sidewalk	swerve	swerve	pedestrians_vs_single_pedestrian	1v1
6260	female	yes	car_occupant	less than 5 years	18-29	3	car_occupant	human	sidewalk	stay	stay	pedestrians_vs_single_pedestrian	1v1
6260	female	yes	car_occupant	less than 5 years	18-29	3	car_occupant	human	sidewalk	stay	swerve	pedestrians_vs_single_pedestrian	4v1
6260	female	yes	car_occupant	less than 5 years	18-29	3	car_occupant	human	sidewalk	stay	stay	pedestrians_vs_single_pedestrian	2v1
6260	female	yes	car_occupant	less than 5 years	18-29	3	car_occupant	human	sidewalk	stay	stay	pedestrians_vs_single_pedestrian	3v1
6260	female	yes	car_occupant	less than 5 years	18-29	3	car_occupant	human	road	stay	stay	pedestrians_vs_single_pedestrian	3v1
6260	female	yes	car_occupant	less than 5 years	18-29	3	car_occupant	human	road	swerve	swerve	pedestrians_vs_single_pedestrian	2v1
6260	female	yes	car_occupant	less than 5 years	18-29	3	car_occupant	human	road	swerve	stay	pedestrians_vs_single_pedestrian	4v1
6260	female	yes	car_occupant	less than 5 years	18-29	3	car_occupant	human	road	stay	swerve	pedestrians_vs_single_pedestrian	1v1
6263	female	yes	pedestrian	6 to 10 years	18-29	5	observer	human	sidewalk	swerve	stay	pedestrians_vs_single_pedestrian	1v1
6263	female	yes	pedestrian	6 to 10 years	18-29	5	observer	human	road	swerve	swerve	pedestrians_vs_single_pedestrian	4v1
6263	female	yes	pedestrian	6 to 10 years	18-29	5	observer	human	sidewalk	swerve	stay	pedestrians_vs_single_pedestrian	3v1
6263	female	yes	pedestrian	6 to 10 years	18-29	5	observer	human	sidewalk	swerve	swerve	pedestrians_vs_single_pedestrian	2v1
6263	female	yes	pedestrian	6 to 10 years	18-29	5	observer	human	road	swerve	stay	pedestrians_vs_single_pedestrian	3v1
6263	female	yes	pedestrian	6 to 10 years	18-29	5	observer	human	road	stay	swerve	pedestrians_vs_single_pedestrian	1v1
6263	female	yes	pedestrian	6 to 10 years	18-29	5	observer	human	road	swerve	stay	pedestrians_vs_single_pedestrian	2v1
6263	female	yes	pedestrian	6 to 10 years	18-29	5	observer	human	sidewalk	swerve	swerve	pedestrians_vs_single_pedestrian	4v1
6266	female	yes	pedestrian	none	18-29	4	pedestrian_front	human	road	swerve	stay	pedestrians_vs_single_pedestrian	2v1
6266	female	yes	pedestrian	none	18-29	4	pedestrian_front	human	sidewalk	swerve	swerve	pedestrians_vs_single_pedestrian	4v1
6266	female	yes	pedestrian	none	18-29	4	pedestrian_front	human	sidewalk	swerve	stay	pedestrians_vs_single_pedestrian	3v1
6266	female	yes	pedestrian	none	18-29	4	pedestrian_front	human	sidewalk	swerve	swerve	pedestrians_vs_single_pedestrian	2v1
6266	female	yes	pedestrian	none	18-29	4	pedestrian_front	human	road	swerve	swerve	pedestrians_vs_single_pedestrian	1v1
6266	female	yes	pedestrian	none	18-29	4	pedestrian_front	human	road	swerve	stay	pedestrians_vs_single_pedestrian	4v1
6266	female	yes	pedestrian	none	18-29	4	pedestrian_front	human	sidewalk	stay	stay	pedestrians_vs_single_pedestrian	1v1
6266	female	yes	pedestrian	none	18-29	4	pedestrian_front	human	road	swerve	swerve	pedestrians_vs_single_pedestrian	3v1
6271	male	yes	pedestrian	6 to 10 years	18-29	3	pedestrian_front	human	sidewalk	swerve	swerve	pedestrians_vs_single_pedestrian	4v1
6271	male	yes	pedestrian	6 to 10 years	18-29	3	pedestrian_front	human	sidewalk	stay	stay	pedestrians_vs_single_pedestrian	1v1
6271	male	yes	pedestrian	6 to 10 years	18-29	3	pedestrian_front	human	road	swerve	swerve	pedestrians_vs_single_pedestrian	3v1
6271	male	yes	pedestrian	6 to 10 years	18-29	3	pedestrian_front	human	road	swerve	stay	pedestrians_vs_single_pedestrian	2v1
6271	male	yes	pedestrian	6 to 10 years	18-29	3	pedestrian_front	human	sidewalk	swerve	stay	pedestrians_vs_single_pedestrian	2v1
6271	male	yes	pedestrian	6 to 10 years	18-29	3	pedestrian_front	human	sidewalk	swerve	stay	pedestrians_vs_single_pedestrian	3v1
6271	male	yes	pedestrian	6 to 10 years	18-29	3	pedestrian_front	human	road	swerve	stay	pedestrians_vs_single_pedestrian	4v1
6271	male	yes	pedestrian	6 to 10 years	18-29	3	pedestrian_front	human	road	swerve	swerve	pedestrians_vs_single_pedestrian	1v1
6275	male	yes	pedestrian	more than 10 years	40-49	2	pedestrian_side	self-driving	sidewalk	swerve	swerve	pedestrians_vs_single_pedestrian	2v1
6275	male	yes	pedestrian	more than 10 years	40-49	2	pedestrian_side	self-driving	sidewalk	swerve	swerve	pedestrians_vs_single_pedestrian	4v1
6275	male	yes	pedestrian	more than 10 years	40-49	2	pedestrian_side	self-driving	road	swerve	stay	pedestrians_vs_single_pedestrian	3v1
6275	male	yes	pedestrian	more than 10 years	40-49	2	pedestrian_side	self-driving	road	swerve	stay	pedestrians_vs_single_pedestrian	2v1
6275	male	yes	pedestrian	more than 10 years	40-49	2	pedestrian_side	self-driving	sidewalk	swerve	swerve	pedestrians_vs_single_pedestrian	3v1
6275	male	yes	pedestrian	more than 10 years	40-49	2	pedestrian_side	self-driving	road	swerve	stay	pedestrians_vs_single_pedestrian	4v1
6275	male	yes	pedestrian	more than 10 years	40-49	2	pedestrian_side	self-driving	sidewalk	swerve	stay	pedestrians_vs_single_pedestrian	1v1
6275	male	yes	pedestrian	more than 10 years	40-49	2	pedestrian_side	self-driving	road	swerve	swerve	pedestrians_vs_single_pedestrian	1v1
6277	female	yes	car_occupant	none	18-29	4	car_occupant	self-driving	road	swerve	stay	pedestrians_vs_single_pedestrian	4v1
6277	female	yes	car_occupant	none	18-29	4	car_occupant	self-driving	road	swerve	swerve	pedestrians_vs_single_pedestrian	3v1
6277	female	yes	car_occupant	none	18-29	4	car_occupant	self-driving	road	swerve	stay	pedestrians_vs_single_pedestrian	2v1
6277	female	yes	car_occupant	none	18-29	4	car_occupant	self-driving	sidewalk	swerve	swerve	pedestrians_vs_single_pedestrian	3v1
6277	female	yes	car_occupant	none	18-29	4	car_occupant	self-driving	sidewalk	swerve	stay	pedestrians_vs_single_pedestrian	4v1
6277	female	yes	car_occupant	none	18-29	4	car_occupant	self-driving	sidewalk	swerve	stay	pedestrians_vs_single_pedestrian	2v1
6277	female	yes	car_occupant	none	18-29	4	car_occupant	self-driving	sidewalk	stay	swerve	pedestrians_vs_single_pedestrian	1v1
6277	female	yes	car_occupant	none	18-29	4	car_occupant	self-driving	road	stay	swerve	pedestrians_vs_single_pedestrian	1v1
6298	male	yes	pedestrian	more than 10 years	60-69	3	observer	self-driving	sidewalk	swerve	stay	pedestrians_vs_single_pedestrian	4v1
6298	male	yes	pedestrian	more than 10 years	60-69	3	observer	self-driving	road	swerve	swerve	pedestrians_vs_single_pedestrian	2v1
6298	male	yes	pedestrian	more than 10 years	60-69	3	observer	self-driving	sidewalk	swerve	stay	pedestrians_vs_single_pedestrian	2v1
6298	male	yes	pedestrian	more than 10 years	60-69	3	observer	self-driving	road	swerve	stay	pedestrians_vs_single_pedestrian	3v1
6298	male	yes	pedestrian	more than 10 years	60-69	3	observer	self-driving	road	swerve	swerve	pedestrians_vs_single_pedestrian	4v1
6298	male	yes	pedestrian	more than 10 years	60-69	3	observer	self-driving	sidewalk	stay	swerve	pedestrians_vs_single_pedestrian	1v1
6298	male	yes	pedestrian	more than 10 years	60-69	3	observer	self-driving	road	stay	stay	pedestrians_vs_single_pedestrian	1v1
6298	male	yes	pedestrian	more than 10 years	60-69	3	observer	self-driving	sidewalk	swerve	swerve	pedestrians_vs_single_pedestrian	3v1
6343	female	yes	car_occupant	more than 10 years	60-69	3	car_occupant	human	sidewalk	swerve	stay	pedestrians_vs_single_pedestrian	2v1
6343	female	yes	car_occupant	more than 10 years	60-69	3	car_occupant	human	sidewalk	swerve	swerve	pedestrians_vs_single_pedestrian	3v1
6343	female	yes	car_occupant	more than 10 years	60-69	3	car_occupant	human	road	swerve	swerve	pedestrians_vs_single_pedestrian	4v1
6343	female	yes	car_occupant	more than 10 years	60-69	3	car_occupant	human	road	swerve	stay	pedestrians_vs_single_pedestrian	1v1
6343	female	yes	car_occupant	more than 10 years	60-69	3	car_occupant	human	road	swerve	stay	pedestrians_vs_single_pedestrian	2v1
6343	female	yes	car_occupant	more than 10 years	60-69	3	car_occupant	human	road	swerve	swerve	pedestrians_vs_single_pedestrian	3v1
6343	female	yes	car_occupant	more than 10 years	60-69	3	car_occupant	human	sidewalk	swerve	swerve	pedestrians_vs_single_pedestrian	4v1
6343	female	yes	car_occupant	more than 10 years	60-69	3	car_occupant	human	sidewalk	stay	stay	pedestrians_vs_single_pedestrian	1v1
6344	male	yes	pedestrian	more than 10 years	30-39	3	car_occupant	human	sidewalk	swerve	stay	pedestrians_vs_single_pedestrian	2v1
6344	male	yes	pedestrian	more than 10 years	30-39	3	car_occupant	human	sidewalk	swerve	swerve	pedestrians_vs_single_pedestrian	1v1
6344	male	yes	pedestrian	more than 10 years	30-39	3	car_occupant	human	sidewalk	swerve	swerve	pedestrians_vs_single_pedestrian	3v1
6344	male	yes	pedestrian	more than 10 years	30-39	3	car_occupant	human	sidewalk	swerve	swerve	pedestrians_vs_single_pedestrian	4v1
6344	male	yes	pedestrian	more than 10 years	30-39	3	car_occupant	human	road	swerve	swerve	pedestrians_vs_single_pedestrian	3v1
6344	male	yes	pedestrian	more than 10 years	30-39	3	car_occupant	human	road	swerve	stay	pedestrians_vs_single_pedestrian	1v1
6344	male	yes	pedestrian	more than 10 years	30-39	3	car_occupant	human	road	swerve	stay	pedestrians_vs_single_pedestrian	4v1
6344	male	yes	pedestrian	more than 10 years	30-39	3	car_occupant	human	road	swerve	stay	pedestrians_vs_single_pedestrian	2v1
6350	male	yes	car_occupant	more than 10 years	60-69	5	observer	human	road	stay	stay	pedestrians_vs_single_pedestrian	1v1
6350	male	yes	car_occupant	more than 10 years	60-69	5	observer	human	sidewalk	swerve	swerve	pedestrians_vs_single_pedestrian	4v1
6350	male	yes	car_occupant	more than 10 years	60-69	5	observer	human	road	swerve	stay	pedestrians_vs_single_pedestrian	3v1
6350	male	yes	car_occupant	more than 10 years	60-69	5	observer	human	road	swerve	stay	pedestrians_vs_single_pedestrian	4v1
6350	male	yes	car_occupant	more than 10 years	60-69	5	observer	human	road	swerve	swerve	pedestrians_vs_single_pedestrian	2v1
6350	male	yes	car_occupant	more than 10 years	60-69	5	observer	human	sidewalk	swerve	stay	pedestrians_vs_single_pedestrian	2v1
6350	male	yes	car_occupant	more than 10 years	60-69	5	observer	human	sidewalk	swerve	swerve	pedestrians_vs_single_pedestrian	3v1
6350	male	yes	car_occupant	more than 10 years	60-69	5	observer	human	sidewalk	stay	stay	pedestrians_vs_single_pedestrian	1v1
6352	male	yes	car_occupant	more than 10 years	50-59	4	observer	human	road	swerve	stay	pedestrians_vs_single_pedestrian	3v1
6352	male	yes	car_occupant	more than 10 years	50-59	4	observer	human	sidewalk	swerve	stay	pedestrians_vs_single_pedestrian	4v1
6352	male	yes	car_occupant	more than 10 years	50-59	4	observer	human	sidewalk	swerve	swerve	pedestrians_vs_single_pedestrian	3v1
6352	male	yes	car_occupant	more than 10 years	50-59	4	observer	human	sidewalk	swerve	swerve	pedestrians_vs_single_pedestrian	2v1
6352	male	yes	car_occupant	more than 10 years	50-59	4	observer	human	road	swerve	swerve	pedestrians_vs_single_pedestrian	2v1
6352	male	yes	car_occupant	more than 10 years	50-59	4	observer	human	sidewalk	stay	stay	pedestrians_vs_single_pedestrian	1v1
6352	male	yes	car_occupant	more than 10 years	50-59	4	observer	human	road	swerve	stay	pedestrians_vs_single_pedestrian	4v1
6352	male	yes	car_occupant	more than 10 years	50-59	4	observer	human	road	stay	stay	pedestrians_vs_single_pedestrian	1v1
6373	male	yes	car_occupant	more than 10 years	40-49	1	pedestrian_front	human	sidewalk	swerve	swerve	pedestrians_vs_single_pedestrian	2v1
6373	male	yes	car_occupant	more than 10 years	40-49	1	pedestrian_front	human	road	swerve	stay	pedestrians_vs_single_pedestrian	4v1
6373	male	yes	car_occupant	more than 10 years	40-49	1	pedestrian_front	human	sidewalk	stay	swerve	pedestrians_vs_single_pedestrian	1v1
6373	male	yes	car_occupant	more than 10 years	40-49	1	pedestrian_front	human	sidewalk	swerve	stay	pedestrians_vs_single_pedestrian	3v1
6373	male	yes	car_occupant	more than 10 years	40-49	1	pedestrian_front	human	sidewalk	swerve	stay	pedestrians_vs_single_pedestrian	4v1
6373	male	yes	car_occupant	more than 10 years	40-49	1	pedestrian_front	human	road	swerve	swerve	pedestrians_vs_single_pedestrian	2v1
6373	male	yes	car_occupant	more than 10 years	40-49	1	pedestrian_front	human	road	stay	stay	pedestrians_vs_single_pedestrian	1v1
6373	male	yes	car_occupant	more than 10 years	40-49	1	pedestrian_front	human	road	swerve	swerve	pedestrians_vs_single_pedestrian	3v1
6415	female	yes	car_occupant	more than 10 years	40-49	1	observer	self-driving	road	swerve	stay	pedestrians_vs_single_pedestrian	2v1
6415	female	yes	car_occupant	more than 10 years	40-49	1	observer	self-driving	road	swerve	stay	pedestrians_vs_single_pedestrian	3v1
6415	female	yes	car_occupant	more than 10 years	40-49	1	observer	self-driving	sidewalk	stay	stay	pedestrians_vs_single_pedestrian	3v1
6415	female	yes	car_occupant	more than 10 years	40-49	1	observer	self-driving	sidewalk	stay	stay	pedestrians_vs_single_pedestrian	1v1
6415	female	yes	car_occupant	more than 10 years	40-49	1	observer	self-driving	road	swerve	swerve	pedestrians_vs_single_pedestrian	4v1
6415	female	yes	car_occupant	more than 10 years	40-49	1	observer	self-driving	road	swerve	swerve	pedestrians_vs_single_pedestrian	1v1
6415	female	yes	car_occupant	more than 10 years	40-49	1	observer	self-driving	sidewalk	swerve	swerve	pedestrians_vs_single_pedestrian	4v1
6415	female	yes	car_occupant	more than 10 years	40-49	1	observer	self-driving	sidewalk	stay	stay	pedestrians_vs_single_pedestrian	2v1
6454	male	yes	pedestrian	less than 5 years	18-29	3	car_occupant	self-driving	sidewalk	swerve	stay	pedestrians_vs_single_pedestrian	4v1
6454	male	yes	pedestrian	less than 5 years	18-29	3	car_occupant	self-driving	road	swerve	stay	pedestrians_vs_single_pedestrian	2v1
6454	male	yes	pedestrian	less than 5 years	18-29	3	car_occupant	self-driving	road	swerve	stay	pedestrians_vs_single_pedestrian	1v1
6454	male	yes	pedestrian	less than 5 years	18-29	3	car_occupant	self-driving	sidewalk	swerve	swerve	pedestrians_vs_single_pedestrian	2v1
6454	male	yes	pedestrian	less than 5 years	18-29	3	car_occupant	self-driving	road	swerve	swerve	pedestrians_vs_single_pedestrian	3v1
6454	male	yes	pedestrian	less than 5 years	18-29	3	car_occupant	self-driving	sidewalk	swerve	swerve	pedestrians_vs_single_pedestrian	1v1
6454	male	yes	pedestrian	less than 5 years	18-29	3	car_occupant	self-driving	road	swerve	stay	pedestrians_vs_single_pedestrian	4v1
6454	male	yes	pedestrian	less than 5 years	18-29	3	car_occupant	self-driving	sidewalk	swerve	swerve	pedestrians_vs_single_pedestrian	3v1
6472	female	yes	pedestrian	more than 10 years	60-69	2	pedestrian_side	self-driving	sidewalk	swerve	swerve	pedestrians_vs_single_pedestrian	2v1
6472	female	yes	pedestrian	more than 10 years	60-69	2	pedestrian_side	self-driving	road	swerve	stay	pedestrians_vs_single_pedestrian	3v1
6472	female	yes	pedestrian	more than 10 years	60-69	2	pedestrian_side	self-driving	sidewalk	swerve	swerve	pedestrians_vs_single_pedestrian	4v1
6472	female	yes	pedestrian	more than 10 years	60-69	2	pedestrian_side	self-driving	sidewalk	swerve	stay	pedestrians_vs_single_pedestrian	3v1
6472	female	yes	pedestrian	more than 10 years	60-69	2	pedestrian_side	self-driving	road	swerve	stay	pedestrians_vs_single_pedestrian	4v1
6472	female	yes	pedestrian	more than 10 years	60-69	2	pedestrian_side	self-driving	road	swerve	stay	pedestrians_vs_single_pedestrian	1v1
6472	female	yes	pedestrian	more than 10 years	60-69	2	pedestrian_side	self-driving	road	swerve	swerve	pedestrians_vs_single_pedestrian	2v1
6472	female	yes	pedestrian	more than 10 years	60-69	2	pedestrian_side	self-driving	sidewalk	swerve	swerve	pedestrians_vs_single_pedestrian	1v1
6480	male	yes	pedestrian	more than 10 years	30-39	4	pedestrian_front	self-driving	road	swerve	swerve	pedestrians_vs_single_pedestrian	2v1
6480	male	yes	pedestrian	more than 10 years	30-39	4	pedestrian_front	self-driving	road	swerve	stay	pedestrians_vs_single_pedestrian	4v1
6480	male	yes	pedestrian	more than 10 years	30-39	4	pedestrian_front	self-driving	road	swerve	stay	pedestrians_vs_single_pedestrian	3v1
6480	male	yes	pedestrian	more than 10 years	30-39	4	pedestrian_front	self-driving	sidewalk	swerve	stay	pedestrians_vs_single_pedestrian	2v1
6480	male	yes	pedestrian	more than 10 years	30-39	4	pedestrian_front	self-driving	road	swerve	swerve	pedestrians_vs_single_pedestrian	1v1
6480	male	yes	pedestrian	more than 10 years	30-39	4	pedestrian_front	self-driving	sidewalk	swerve	stay	pedestrians_vs_single_pedestrian	4v1
6480	male	yes	pedestrian	more than 10 years	30-39	4	pedestrian_front	self-driving	sidewalk	swerve	swerve	pedestrians_vs_single_pedestrian	3v1
6480	male	yes	pedestrian	more than 10 years	30-39	4	pedestrian_front	self-driving	sidewalk	swerve	stay	pedestrians_vs_single_pedestrian	1v1
6482	male	yes	pedestrian	more than 10 years	18-29	2	observer	self-driving	road	swerve	stay	pedestrians_vs_single_pedestrian	2v1
6482	male	yes	pedestrian	more than 10 years	18-29	2	observer	self-driving	sidewalk	stay	swerve	pedestrians_vs_single_pedestrian	3v1
6482	male	yes	pedestrian	more than 10 years	18-29	2	observer	self-driving	road	swerve	swerve	pedestrians_vs_single_pedestrian	3v1
6482	male	yes	pedestrian	more than 10 years	18-29	2	observer	self-driving	sidewalk	swerve	stay	pedestrians_vs_single_pedestrian	2v1
6482	male	yes	pedestrian	more than 10 years	18-29	2	observer	self-driving	road	stay	stay	pedestrians_vs_single_pedestrian	1v1
6482	male	yes	pedestrian	more than 10 years	18-29	2	observer	self-driving	sidewalk	swerve	swerve	pedestrians_vs_single_pedestrian	4v1
6482	male	yes	pedestrian	more than 10 years	18-29	2	observer	self-driving	sidewalk	stay	stay	pedestrians_vs_single_pedestrian	1v1
[truncated: 2,073 more rows]
