# Supplementary material for: Moral Judgements on the Actions of Self-Driving Cars and Human Drivers in Dilemma Situations From Different Perspectives
Source: Front Psychol. 2019 Nov 1;10:2415. doi: 10.3389/fpsyg.2019.02415 (PMC6844247; doi:10.3389/fpsyg.2019.02415)
Supplement: Data Sheet 3 — Additional information for methods and results. [file Data_Sheet_1.CSV]

participant	gender	motorist	perspective	identification	age	driving_experience	education	opinion_of_self_driving_cars	visual_acuity	confidence	scenario	trial	judgement
029	male	self-driving	pedestrian (larger group/adults)	observer	21	1 to 5 years	no higher education	positive	no impairment	71	children_vs_adults	smaller_groups	towards_adults
029	male	self-driving	pedestrian (larger group/adults)	observer	21	1 to 5 years	no higher education	positive	no impairment	68	children_vs_adults	larger_groups	towards_adults
059	male	self-driving	passenger	passenger	19	none	no higher education	very positive	corrected vision	50	children_vs_adults	smaller_groups	towards_adults
059	male	self-driving	passenger	passenger	19	none	no higher education	very positive	corrected vision	65	children_vs_adults	larger_groups	towards_adults
010	female	human	passenger	observer	21	1 to 5 years	no higher education	very positive	no impairment	63	children_vs_adults	larger_groups	towards_children
010	female	human	passenger	observer	21	1 to 5 years	no higher education	very positive	no impairment	61	children_vs_adults	smaller_groups	towards_adults
022	female	self-driving	passenger	passenger	24	5 to 10 years	no higher education	positive	no impairment	16	children_vs_adults	larger_groups	towards_children
022	female	self-driving	passenger	passenger	24	5 to 10 years	no higher education	positive	no impairment	23	children_vs_adults	smaller_groups	towards_children
001	female	self-driving	pedestrian (larger group/adults)	observer	24	5 to 10 years	undergraduate studies	negative	no impairment	39	children_vs_adults	smaller_groups	towards_adults
001	female	self-driving	pedestrian (larger group/adults)	observer	24	5 to 10 years	undergraduate studies	negative	no impairment	36	children_vs_adults	larger_groups	towards_adults
019	male	self-driving	observer	observer	21	none	no higher education	very positive	no impairment	36	children_vs_adults	smaller_groups	towards_adults
019	male	self-driving	observer	observer	21	none	no higher education	very positive	no impairment	22	children_vs_adults	larger_groups	towards_adults
152	female	self-driving	observer	observer	25	5 to 10 years	undergraduate studies	neutral	no impairment	74	children_vs_adults	larger_groups	towards_adults
152	female	self-driving	observer	observer	25	5 to 10 years	undergraduate studies	neutral	no impairment	0	children_vs_adults	smaller_groups	towards_children
009	male	human	observer	pedestrian	26	none	undergraduate studies	neutral	corrected vision	20	children_vs_adults	larger_groups	towards_children
009	male	human	observer	pedestrian	26	none	undergraduate studies	neutral	corrected vision	24	children_vs_adults	smaller_groups	towards_adults
184	male	human	pedestrian (larger group/adults)	pedestrian	27	more than 10 years	no higher education	very positive	corrected vision	6	children_vs_adults	larger_groups	towards_adults
184	male	human	pedestrian (larger group/adults)	pedestrian	27	more than 10 years	no higher education	very positive	corrected vision	10	children_vs_adults	smaller_groups	towards_adults
145	female	human	passenger	passenger	19	1 to 5 years	no higher education	very negative	no impairment	10	children_vs_adults	smaller_groups	towards_adults
145	female	human	passenger	passenger	19	1 to 5 years	no higher education	very negative	no impairment	0	children_vs_adults	larger_groups	towards_adults
132	male	human	observer	observer	23	5 to 10 years	no higher education	positive	no impairment	0	children_vs_adults	smaller_groups	towards_adults
132	male	human	observer	observer	23	5 to 10 years	no higher education	positive	no impairment	0	children_vs_adults	larger_groups	towards_children
090	male	human	passenger	passenger	20	1 to 5 years	no higher education	positive	uncorrected vision	66	children_vs_adults	smaller_groups	towards_children
090	male	human	passenger	passenger	20	1 to 5 years	no higher education	positive	uncorrected vision	37	children_vs_adults	larger_groups	towards_children
063	female	human	pedestrian (smaller group/children)	pedestrian	26	1 to 5 years	undergraduate studies	negative	corrected vision	100	children_vs_adults	smaller_groups	towards_adults
063	female	human	pedestrian (smaller group/children)	pedestrian	26	1 to 5 years	undergraduate studies	negative	corrected vision	100	children_vs_adults	larger_groups	towards_adults
093	male	human	observer	observer	22	5 to 10 years	no higher education	positive	no impairment	24	children_vs_adults	smaller_groups	towards_children
093	male	human	observer	observer	22	5 to 10 years	no higher education	positive	no impairment	26	children_vs_adults	larger_groups	towards_children
138	female	self-driving	pedestrian (smaller group/children)	pedestrian	22	1 to 5 years	no higher education	negative	corrected vision	5	children_vs_adults	smaller_groups	towards_children
138	female	self-driving	pedestrian (smaller group/children)	pedestrian	22	1 to 5 years	no higher education	negative	corrected vision	72	children_vs_adults	larger_groups	towards_children
105	male	human	pedestrian (larger group/adults)	pedestrian	26	5 to 10 years	undergraduate studies	very positive	no impairment	27	children_vs_adults	larger_groups	towards_children
105	male	human	pedestrian (larger group/adults)	pedestrian	26	5 to 10 years	undergraduate studies	very positive	no impairment	30	children_vs_adults	smaller_groups	towards_children
018	male	human	passenger	pedestrian	21	1 to 5 years	no higher education	positive	no impairment	44	children_vs_adults	smaller_groups	towards_adults
018	male	human	passenger	pedestrian	21	1 to 5 years	no higher education	positive	no impairment	58	children_vs_adults	larger_groups	towards_adults
130	female	self-driving	passenger	passenger	20	1 to 5 years	no higher education	positive	no impairment	100	children_vs_adults	larger_groups	towards_children
130	female	self-driving	passenger	passenger	20	1 to 5 years	no higher education	positive	no impairment	98	children_vs_adults	smaller_groups	towards_children
030	female	human	passenger	passenger	21	1 to 5 years	no higher education	very positive	corrected vision	14	children_vs_adults	larger_groups	towards_adults
030	female	human	passenger	passenger	21	1 to 5 years	no higher education	very positive	corrected vision	37	children_vs_adults	smaller_groups	towards_adults
097	male	self-driving	observer	pedestrian	20	none	no higher education	positive	no impairment	68	children_vs_adults	larger_groups	towards_children
097	male	self-driving	observer	pedestrian	20	none	no higher education	positive	no impairment	0	children_vs_adults	smaller_groups	towards_adults
128	female	self-driving	observer	observer	24	1 to 5 years	undergraduate studies	negative	corrected vision	27	children_vs_adults	smaller_groups	towards_adults
128	female	self-driving	observer	observer	24	1 to 5 years	undergraduate studies	negative	corrected vision	33	children_vs_adults	larger_groups	towards_adults
179	male	human	passenger	passenger	23	5 to 10 years	no higher education	positive	no impairment	59	children_vs_adults	larger_groups	towards_children
179	male	human	passenger	passenger	23	5 to 10 years	no higher education	positive	no impairment	63	children_vs_adults	smaller_groups	towards_children
089	male	human	pedestrian (smaller group/children)	observer	26	5 to 10 years	no higher education	very positive	no impairment	72	children_vs_adults	larger_groups	towards_adults
089	male	human	pedestrian (smaller group/children)	observer	26	5 to 10 years	no higher education	very positive	no impairment	100	children_vs_adults	smaller_groups	towards_children
183	female	human	pedestrian (larger group/adults)	observer	24	1 to 5 years	undergraduate studies	neutral	no impairment	0	children_vs_adults	larger_groups	towards_adults
183	female	human	pedestrian (larger group/adults)	observer	24	1 to 5 years	undergraduate studies	neutral	no impairment	0	children_vs_adults	smaller_groups	towards_adults
077	female	self-driving	passenger	passenger	21	none	undergraduate studies	very negative	corrected vision	63	children_vs_adults	larger_groups	towards_adults
077	female	self-driving	passenger	passenger	21	none	undergraduate studies	very negative	corrected vision	63	children_vs_adults	smaller_groups	towards_children
168	female	human	pedestrian (smaller group/children)	pedestrian	19	1 to 5 years	no higher education	neutral	no impairment	0	children_vs_adults	larger_groups	towards_adults
168	female	human	pedestrian (smaller group/children)	pedestrian	19	1 to 5 years	no higher education	neutral	no impairment	29	children_vs_adults	smaller_groups	towards_adults
058	female	self-driving	pedestrian (larger group/adults)	pedestrian	28	more than 10 years	undergraduate studies	negative	uncorrected vision	100	children_vs_adults	larger_groups	towards_adults
058	female	self-driving	pedestrian (larger group/adults)	pedestrian	28	more than 10 years	undergraduate studies	negative	uncorrected vision	100	children_vs_adults	smaller_groups	towards_adults
118	female	self-driving	passenger	passenger	21	1 to 5 years	no higher education	positive	no impairment	35	children_vs_adults	smaller_groups	towards_children
118	female	self-driving	passenger	passenger	21	1 to 5 years	no higher education	positive	no impairment	27	children_vs_adults	larger_groups	towards_children
172	male	human	pedestrian (smaller group/children)	pedestrian	22	1 to 5 years	no higher education	neutral	no impairment	11	children_vs_adults	smaller_groups	towards_adults
172	male	human	pedestrian (smaller group/children)	pedestrian	22	1 to 5 years	no higher education	neutral	no impairment	19	children_vs_adults	larger_groups	towards_adults
124	female	self-driving	passenger	passenger	20	1 to 5 years	no higher education	positive	corrected vision	86	children_vs_adults	smaller_groups	towards_adults
124	female	self-driving	passenger	passenger	20	1 to 5 years	no higher education	positive	corrected vision	83	children_vs_adults	larger_groups	towards_adults
157	male	self-driving	passenger	pedestrian	20	1 to 5 years	no higher education	positive	no impairment	10	children_vs_adults	larger_groups	towards_adults
157	male	self-driving	passenger	pedestrian	20	1 to 5 years	no higher education	positive	no impairment	5	children_vs_adults	smaller_groups	towards_children
075	female	self-driving	passenger	passenger	21	1 to 5 years	no higher education	negative	corrected vision	71	children_vs_adults	larger_groups	towards_children
075	female	self-driving	passenger	passenger	21	1 to 5 years	no higher education	negative	corrected vision	87	children_vs_adults	smaller_groups	towards_children
129	female	self-driving	passenger	passenger	21	none	no higher education	neutral	no impairment	25	children_vs_adults	smaller_groups	towards_children
129	female	self-driving	passenger	passenger	21	none	no higher education	neutral	no impairment	14	children_vs_adults	larger_groups	towards_children
028	male	self-driving	observer	passenger	30	more than 10 years	undergraduate studies	negative	corrected vision	0	children_vs_adults	smaller_groups	towards_children
028	male	self-driving	observer	passenger	30	more than 10 years	undergraduate studies	negative	corrected vision	0	children_vs_adults	larger_groups	towards_children
102	female	human	pedestrian (smaller group/children)	pedestrian	47	more than 10 years	no higher education	negative	no impairment	71	children_vs_adults	smaller_groups	towards_adults
102	female	human	pedestrian (smaller group/children)	pedestrian	47	more than 10 years	no higher education	negative	no impairment	50	children_vs_adults	larger_groups	towards_adults
181	male	self-driving	pedestrian (larger group/adults)	passenger	25	1 to 5 years	no higher education	neutral	no impairment	62	children_vs_adults	smaller_groups	towards_adults
181	male	self-driving	pedestrian (larger group/adults)	passenger	25	1 to 5 years	no higher education	neutral	no impairment	75	children_vs_adults	larger_groups	towards_adults
024	female	self-driving	pedestrian (larger group/adults)	pedestrian	23	1 to 5 years	undergraduate studies	positive	no impairment	10	children_vs_adults	smaller_groups	towards_adults
024	female	self-driving	pedestrian (larger group/adults)	pedestrian	23	1 to 5 years	undergraduate studies	positive	no impairment	7	children_vs_adults	larger_groups	towards_adults
085	male	self-driving	passenger	passenger	26	5 to 10 years	undergraduate studies	very positive	no impairment	72	children_vs_adults	larger_groups	towards_adults
085	male	self-driving	passenger	passenger	26	5 to 10 years	undergraduate studies	very positive	no impairment	65	children_vs_adults	smaller_groups	towards_adults
069	female	self-driving	observer	observer	26	5 to 10 years	graduate studies	positive	corrected vision	0	children_vs_adults	smaller_groups	towards_children
069	female	self-driving	observer	observer	26	5 to 10 years	graduate studies	positive	corrected vision	3	children_vs_adults	larger_groups	towards_children
123	male	human	passenger	passenger	20	1 to 5 years	no higher education	very positive	no impairment	79	children_vs_adults	larger_groups	towards_adults
123	male	human	passenger	passenger	20	1 to 5 years	no higher education	very positive	no impairment	85	children_vs_adults	smaller_groups	towards_adults
066	male	self-driving	pedestrian (smaller group/children)	observer	23	5 to 10 years	no higher education	positive	no impairment	80	children_vs_adults	smaller_groups	towards_children
066	male	self-driving	pedestrian (smaller group/children)	observer	23	5 to 10 years	no higher education	positive	no impairment	100	children_vs_adults	larger_groups	towards_children
076	male	human	observer	passenger	22	1 to 5 years	no higher education	positive	corrected vision	70	children_vs_adults	smaller_groups	towards_adults
076	male	human	observer	passenger	22	1 to 5 years	no higher education	positive	corrected vision	65	children_vs_adults	larger_groups	towards_adults
169	male	human	passenger	passenger	18	1 to 5 years	no higher education	positive	corrected vision	60	children_vs_adults	smaller_groups	towards_adults
169	male	human	passenger	passenger	18	1 to 5 years	no higher education	positive	corrected vision	100	children_vs_adults	larger_groups	towards_adults
096	female	self-driving	passenger	passenger	21	1 to 5 years	no higher education	negative	uncorrected vision	26	children_vs_adults	smaller_groups	towards_adults
096	female	self-driving	passenger	passenger	21	1 to 5 years	no higher education	negative	uncorrected vision	17	children_vs_adults	larger_groups	towards_children
170	female	human	passenger	passenger	20	1 to 5 years	no higher education	negative	no impairment	69	children_vs_adults	larger_groups	towards_adults
170	female	human	passenger	passenger	20	1 to 5 years	no higher education	negative	no impairment	35	children_vs_adults	smaller_groups	towards_adults
042	female	human	pedestrian (larger group/adults)	observer	24	5 to 10 years	no higher education	negative	no impairment	0	children_vs_adults	smaller_groups	towards_adults
042	female	human	pedestrian (larger group/adults)	observer	24	5 to 10 years	no higher education	negative	no impairment	65	children_vs_adults	larger_groups	towards_adults
011	male	self-driving	passenger	passenger	25	none	no higher education	negative	no impairment	100	children_vs_adults	smaller_groups	towards_adults
011	male	self-driving	passenger	passenger	25	none	no higher education	negative	no impairment	84	children_vs_adults	larger_groups	towards_adults
034	female	human	pedestrian (larger group/adults)	observer	24	5 to 10 years	undergraduate studies	neutral	corrected vision	78	children_vs_adults	larger_groups	towards_adults
034	female	human	pedestrian (larger group/adults)	observer	24	5 to 10 years	undergraduate studies	neutral	corrected vision	85	children_vs_adults	smaller_groups	towards_adults
072	male	self-driving	observer	observer	23	1 to 5 years	no higher education	positive	uncorrected vision	58	children_vs_adults	larger_groups	towards_children
072	male	self-driving	observer	observer	23	1 to 5 years	no higher education	positive	uncorrected vision	65	children_vs_adults	smaller_groups	towards_children
178	male	self-driving	pedestrian (smaller group/children)	observer	24	1 to 5 years	no higher education	very positive	corrected vision	78	children_vs_adults	smaller_groups	towards_adults
178	male	self-driving	pedestrian (smaller group/children)	observer	24	1 to 5 years	no higher education	very positive	corrected vision	79	children_vs_adults	larger_groups	towards_adults
151	male	self-driving	passenger	passenger	19	1 to 5 years	no higher education	positive	corrected vision	0	children_vs_adults	larger_groups	towards_children
151	male	self-driving	passenger	passenger	19	1 to 5 years	no higher education	positive	corrected vision	10	children_vs_adults	smaller_groups	towards_children
110	female	self-driving	pedestrian (larger group/adults)	pedestrian	23	5 to 10 years	undergraduate studies	neutral	no impairment	50	children_vs_adults	smaller_groups	towards_adults
110	female	self-driving	pedestrian (larger group/adults)	pedestrian	23	5 to 10 years	undergraduate studies	neutral	no impairment	73	children_vs_adults	larger_groups	towards_adults
149	male	human	observer	passenger	24	5 to 10 years	no higher education	positive	no impairment	50	children_vs_adults	smaller_groups	towards_adults
149	male	human	observer	passenger	24	5 to 10 years	no higher education	positive	no impairment	77	children_vs_adults	larger_groups	towards_adults
073	male	human	observer	observer	21	none	no higher education	very positive	no impairment	63	children_vs_adults	larger_groups	towards_adults
073	male	human	observer	observer	21	none	no higher education	very positive	no impairment	66	children_vs_adults	smaller_groups	towards_adults
031	male	self-driving	pedestrian (smaller group/children)	pedestrian	22	5 to 10 years	no higher education	positive	corrected vision	32	children_vs_adults	smaller_groups	towards_adults
031	male	self-driving	pedestrian (smaller group/children)	pedestrian	22	5 to 10 years	no higher education	positive	corrected vision	73	children_vs_adults	larger_groups	towards_children
050	female	human	observer	passenger	22	5 to 10 years	undergraduate studies	positive	no impairment	32	children_vs_adults	larger_groups	towards_adults
050	female	human	observer	passenger	22	5 to 10 years	undergraduate studies	positive	no impairment	92	children_vs_adults	smaller_groups	towards_adults
116	male	human	pedestrian (larger group/adults)	observer	26	none	undergraduate studies	positive	corrected vision	66	children_vs_adults	larger_groups	towards_adults
116	male	human	pedestrian (larger group/adults)	observer	26	none	undergraduate studies	positive	corrected vision	94	children_vs_adults	smaller_groups	towards_adults
020	male	self-driving	pedestrian (smaller group/children)	observer	27	5 to 10 years	no higher education	very positive	corrected vision	100	children_vs_adults	smaller_groups	towards_children
020	male	self-driving	pedestrian (smaller group/children)	observer	27	5 to 10 years	no higher education	very positive	corrected vision	100	children_vs_adults	larger_groups	towards_children
142	male	self-driving	observer	observer	19	1 to 5 years	no higher education	positive	no impairment	17	children_vs_adults	larger_groups	towards_adults
142	male	self-driving	observer	observer	19	1 to 5 years	no higher education	positive	no impairment	7	children_vs_adults	smaller_groups	towards_adults
082	female	human	pedestrian (smaller group/children)	observer	20	1 to 5 years	no higher education	neutral	corrected vision	64	children_vs_adults	larger_groups	towards_children
082	female	human	pedestrian (smaller group/children)	observer	20	1 to 5 years	no higher education	neutral	corrected vision	64	children_vs_adults	smaller_groups	towards_children
062	female	self-driving	pedestrian (smaller group/children)	observer	22	1 to 5 years	undergraduate studies	negative	no impairment	60	children_vs_adults	larger_groups	towards_adults
062	female	self-driving	pedestrian (smaller group/children)	observer	22	1 to 5 years	undergraduate studies	negative	no impairment	24	children_vs_adults	smaller_groups	towards_adults
140	female	self-driving	pedestrian (smaller group/children)	observer	22	5 to 10 years	no higher education	positive	no impairment	38	children_vs_adults	smaller_groups	towards_children
140	female	self-driving	pedestrian (smaller group/children)	observer	22	5 to 10 years	no higher education	positive	no impairment	36	children_vs_adults	larger_groups	towards_children
036	male	self-driving	pedestrian (smaller group/children)	pedestrian	20	1 to 5 years	no higher education	positive	no impairment	71	children_vs_adults	smaller_groups	towards_adults
036	male	self-driving	pedestrian (smaller group/children)	pedestrian	20	1 to 5 years	no higher education	positive	no impairment	38	children_vs_adults	larger_groups	towards_adults
012	female	self-driving	observer	observer	19	1 to 5 years	no higher education	very negative	no impairment	15	children_vs_adults	larger_groups	towards_adults
012	female	self-driving	observer	observer	19	1 to 5 years	no higher education	very negative	no impairment	52	children_vs_adults	smaller_groups	towards_adults
032	female	human	pedestrian (smaller group/children)	pedestrian	29	more than 10 years	no higher education	positive	uncorrected vision	35	children_vs_adults	smaller_groups	towards_children
032	female	human	pedestrian (smaller group/children)	pedestrian	29	more than 10 years	no higher education	positive	uncorrected vision	26	children_vs_adults	larger_groups	towards_children
006	female	human	pedestrian (larger group/adults)	observer	24	none	undergraduate studies	positive	corrected vision	50	children_vs_adults	smaller_groups	towards_children
006	female	human	pedestrian (larger group/adults)	observer	24	none	undergraduate studies	positive	corrected vision	82	children_vs_adults	larger_groups	towards_children
025	male	self-driving	observer	pedestrian	20	1 to 5 years	no higher education	negative	corrected vision	28	children_vs_adults	smaller_groups	towards_children
025	male	self-driving	observer	pedestrian	20	1 to 5 years	no higher education	negative	corrected vision	11	children_vs_adults	larger_groups	towards_children
100	male	self-driving	pedestrian (smaller group/children)	observer	22	1 to 5 years	undergraduate studies	very positive	no impairment	92	children_vs_adults	larger_groups	towards_adults
100	male	self-driving	pedestrian (smaller group/children)	observer	22	1 to 5 years	undergraduate studies	very positive	no impairment	62	children_vs_adults	smaller_groups	towards_adults
007	female	human	observer	passenger	20	none	no higher education	negative	no impairment	36	children_vs_adults	larger_groups	towards_adults
007	female	human	observer	passenger	20	none	no higher education	negative	no impairment	52	children_vs_adults	smaller_groups	towards_adults
070	male	self-driving	pedestrian (larger group/adults)	pedestrian	22	none	no higher education	positive	corrected vision	12	children_vs_adults	larger_groups	towards_children
070	male	self-driving	pedestrian (larger group/adults)	pedestrian	22	none	no higher education	positive	corrected vision	34	children_vs_adults	smaller_groups	towards_children
144	male	self-driving	pedestrian (larger group/adults)	observer	20	1 to 5 years	no higher education	neutral	uncorrected vision	28	children_vs_adults	larger_groups	towards_children
144	male	self-driving	pedestrian (larger group/adults)	observer	20	1 to 5 years	no higher education	neutral	uncorrected vision	35	children_vs_adults	smaller_groups	towards_adults
091	male	human	pedestrian (smaller group/children)	pedestrian	28	none	undergraduate studies	very positive	no impairment	50	children_vs_adults	larger_groups	towards_adults
091	male	human	pedestrian (smaller group/children)	pedestrian	28	none	undergraduate studies	very positive	no impairment	0	children_vs_adults	smaller_groups	towards_adults
080	female	self-driving	observer	observer	20	1 to 5 years	no higher education	positive	no impairment	0	children_vs_adults	smaller_groups	towards_children
080	female	self-driving	observer	observer	20	1 to 5 years	no higher education	positive	no impairment	0	children_vs_adults	larger_groups	towards_adults
126	female	human	passenger	passenger	21	1 to 5 years	no higher education	negative	corrected vision	50	children_vs_adults	smaller_groups	towards_children
126	female	human	passenger	passenger	21	1 to 5 years	no higher education	negative	corrected vision	75	children_vs_adults	larger_groups	towards_children
173	male	self-driving	observer	pedestrian	30	5 to 10 years	undergraduate studies	very positive	no impairment	100	children_vs_adults	smaller_groups	towards_adults
173	male	self-driving	observer	pedestrian	30	5 to 10 years	undergraduate studies	very positive	no impairment	100	children_vs_adults	larger_groups	towards_children
162	male	self-driving	passenger	passenger	22	1 to 5 years	no higher education	very positive	uncorrected vision	33	children_vs_adults	larger_groups	towards_adults
162	male	self-driving	passenger	passenger	22	1 to 5 years	no higher education	very positive	uncorrected vision	35	children_vs_adults	smaller_groups	towards_adults
134	male	self-driving	passenger	passenger	20	1 to 5 years	no higher education	very negative	no impairment	32	children_vs_adults	larger_groups	towards_adults
134	male	self-driving	passenger	passenger	20	1 to 5 years	no higher education	very negative	no impairment	77	children_vs_adults	smaller_groups	towards_adults
067	male	human	observer	observer	20	1 to 5 years	no higher education	positive	no impairment	2	children_vs_adults	smaller_groups	towards_adults
067	male	human	observer	observer	20	1 to 5 years	no higher education	positive	no impairment	3	children_vs_adults	larger_groups	towards_adults
156	male	human	pedestrian (larger group/adults)	pedestrian	21	1 to 5 years	undergraduate studies	very positive	uncorrected vision	100	children_vs_adults	larger_groups	towards_children
156	male	human	pedestrian (larger group/adults)	pedestrian	21	1 to 5 years	undergraduate studies	very positive	uncorrected vision	100	children_vs_adults	smaller_groups	towards_adults
037	female	self-driving	pedestrian (smaller group/children)	pedestrian	19	1 to 5 years	no higher education	negative	uncorrected vision	37	children_vs_adults	larger_groups	towards_adults
037	female	self-driving	pedestrian (smaller group/children)	pedestrian	19	1 to 5 years	no higher education	negative	uncorrected vision	40	children_vs_adults	smaller_groups	towards_children
056	female	human	observer	observer	19	1 to 5 years	no higher education	neutral	no impairment	10	children_vs_adults	smaller_groups	towards_adults
056	female	human	observer	observer	19	1 to 5 years	no higher education	neutral	no impairment	30	children_vs_adults	larger_groups	towards_children
054	male	self-driving	pedestrian (larger group/adults)	observer	18	1 to 5 years	no higher education	very positive	corrected vision	23	children_vs_adults	larger_groups	towards_children
054	male	self-driving	pedestrian (larger group/adults)	observer	18	1 to 5 years	no higher education	very positive	corrected vision	1	children_vs_adults	smaller_groups	towards_children
135	female	self-driving	pedestrian (smaller group/children)	observer	20	none	no higher education	positive	no impairment	84	children_vs_adults	larger_groups	towards_children
135	female	self-driving	pedestrian (smaller group/children)	observer	20	none	no higher education	positive	no impairment	82	children_vs_adults	smaller_groups	towards_children
120	male	self-driving	pedestrian (larger group/adults)	observer	19	1 to 5 years	no higher education	positive	corrected vision	30	children_vs_adults	smaller_groups	towards_adults
120	male	self-driving	pedestrian (larger group/adults)	observer	19	1 to 5 years	no higher education	positive	corrected vision	23	children_vs_adults	larger_groups	towards_children
101	male	human	pedestrian (larger group/adults)	pedestrian	24	5 to 10 years	undergraduate studies	neutral	corrected vision	51	children_vs_adults	smaller_groups	towards_children
101	male	human	pedestrian (larger group/adults)	pedestrian	24	5 to 10 years	undergraduate studies	neutral	corrected vision	50	children_vs_adults	larger_groups	towards_children
160	female	self-driving	observer	observer	24	5 to 10 years	undergraduate studies	neutral	no impairment	33	children_vs_adults	smaller_groups	towards_children
160	female	self-driving	observer	observer	24	5 to 10 years	undergraduate studies	neutral	no impairment	16	children_vs_adults	larger_groups	towards_children
165	male	self-driving	pedestrian (smaller group/children)	pedestrian	22	1 to 5 years	no higher education	neutral	no impairment	22	children_vs_adults	larger_groups	towards_children
165	male	self-driving	pedestrian (smaller group/children)	pedestrian	22	1 to 5 years	no higher education	neutral	no impairment	38	children_vs_adults	smaller_groups	towards_children
051	female	self-driving	pedestrian (larger group/adults)	pedestrian	24	1 to 5 years	undergraduate studies	neutral	corrected vision	75	children_vs_adults	larger_groups	towards_adults
051	female	self-driving	pedestrian (larger group/adults)	pedestrian	24	1 to 5 years	undergraduate studies	neutral	corrected vision	63	children_vs_adults	smaller_groups	towards_adults
122	female	human	observer	observer	20	none	no higher education	positive	uncorrected vision	0	children_vs_adults	larger_groups	towards_children
122	female	human	observer	observer	20	none	no higher education	positive	uncorrected vision	23	children_vs_adults	smaller_groups	towards_adults
174	male	human	pedestrian (larger group/adults)	pedestrian	25	5 to 10 years	no higher education	very positive	corrected vision	42	children_vs_adults	smaller_groups	towards_children
174	male	human	pedestrian (larger group/adults)	pedestrian	25	5 to 10 years	no higher education	very positive	corrected vision	30	children_vs_adults	larger_groups	towards_children
139	female	self-driving	pedestrian (larger group/adults)	observer	25	5 to 10 years	no higher education	negative	no impairment	66	children_vs_adults	larger_groups	towards_adults
139	female	self-driving	pedestrian (larger group/adults)	observer	25	5 to 10 years	no higher education	negative	no impairment	66	children_vs_adults	smaller_groups	towards_adults
061	male	human	passenger	passenger	28	1 to 5 years	no higher education	positive	no impairment	80	children_vs_adults	larger_groups	towards_adults
061	male	human	passenger	passenger	28	1 to 5 years	no higher education	positive	no impairment	88	children_vs_adults	smaller_groups	towards_adults
046	female	human	pedestrian (smaller group/children)	observer	18	1 to 5 years	no higher education	very negative	uncorrected vision	100	children_vs_adults	larger_groups	towards_children
046	female	human	pedestrian (smaller group/children)	observer	18	1 to 5 years	no higher education	very negative	uncorrected vision	93	children_vs_adults	smaller_groups	towards_children
026	female	human	passenger	passenger	21	none	no higher education	neutral	no impairment	23	children_vs_adults	larger_groups	towards_children
026	female	human	passenger	passenger	21	none	no higher education	neutral	no impairment	15	children_vs_adults	smaller_groups	towards_children
016	male	self-driving	pedestrian (larger group/adults)	observer	21	1 to 5 years	no higher education	positive	no impairment	50	children_vs_adults	smaller_groups	towards_adults
016	male	self-driving	pedestrian (larger group/adults)	observer	21	1 to 5 years	no higher education	positive	no impairment	40	children_vs_adults	larger_groups	towards_children
125	male	human	pedestrian (smaller group/children)	pedestrian	20	1 to 5 years	no higher education	very positive	no impairment	100	children_vs_adults	smaller_groups	towards_children
125	male	human	pedestrian (smaller group/children)	pedestrian	20	1 to 5 years	no higher education	very positive	no impairment	100	children_vs_adults	larger_groups	towards_children
148	male	self-driving	passenger	passenger	25	5 to 10 years	undergraduate studies	neutral	uncorrected vision	27	children_vs_adults	smaller_groups	towards_adults
148	male	self-driving	passenger	passenger	25	5 to 10 years	undergraduate studies	neutral	uncorrected vision	11	children_vs_adults	larger_groups	towards_adults
053	female	human	pedestrian (smaller group/children)	observer	22	1 to 5 years	undergraduate studies	neutral	no impairment	100	children_vs_adults	smaller_groups	towards_adults
053	female	human	pedestrian (smaller group/children)	observer	22	1 to 5 years	undergraduate studies	neutral	no impairment	71	children_vs_adults	larger_groups	towards_adults
055	female	human	passenger	passenger	20	none	no higher education	neutral	no impairment	16	children_vs_adults	larger_groups	towards_children
055	female	human	passenger	passenger	20	none	no higher education	neutral	no impairment	50	children_vs_adults	smaller_groups	towards_adults
109	female	human	observer	observer	26	5 to 10 years	no higher education	neutral	no impairment	79	children_vs_adults	larger_groups	towards_adults
109	female	human	observer	observer	26	5 to 10 years	no higher education	neutral	no impairment	75	children_vs_adults	smaller_groups	towards_children
104	male	human	passenger	observer	25	5 to 10 years	undergraduate studies	positive	corrected vision	50	children_vs_adults	smaller_groups	towards_adults
104	male	human	passenger	observer	25	5 to 10 years	undergraduate studies	positive	corrected vision	61	children_vs_adults	larger_groups	towards_children
095	male	self-driving	observer	observer	21	1 to 5 years	no higher education	negative	no impairment	0	children_vs_adults	smaller_groups	towards_adults
095	male	self-driving	observer	observer	21	1 to 5 years	no higher education	negative	no impairment	0	children_vs_adults	larger_groups	towards_adults
117	male	human	passenger	observer	22	1 to 5 years	no higher education	neutral	corrected vision	4	children_vs_adults	larger_groups	towards_adults
117	male	human	passenger	observer	22	1 to 5 years	no higher education	neutral	corrected vision	64	children_vs_adults	smaller_groups	towards_adults
161	female	human	passenger	passenger	20	1 to 5 years	no higher education	positive	no impairment	28	children_vs_adults	smaller_groups	towards_children
161	female	human	passenger	passenger	20	1 to 5 years	no higher education	positive	no impairment	63	children_vs_adults	larger_groups	towards_children
060	female	self-driving	observer	observer	25	5 to 10 years	no higher education	neutral	no impairment	77	children_vs_adults	smaller_groups	towards_adults
060	female	self-driving	observer	observer	25	5 to 10 years	no higher education	neutral	no impairment	73	children_vs_adults	larger_groups	towards_adults
068	male	human	pedestrian (larger group/adults)	pedestrian	24	5 to 10 years	undergraduate studies	very positive	corrected vision	24	children_vs_adults	smaller_groups	towards_adults
068	male	human	pedestrian (larger group/adults)	pedestrian	24	5 to 10 years	undergraduate studies	very positive	corrected vision	0	children_vs_adults	larger_groups	towards_adults
137	male	self-driving	observer	observer	31	more than 10 years	undergraduate studies	positive	corrected vision	0	children_vs_adults	smaller_groups	towards_adults
137	male	self-driving	observer	observer	31	more than 10 years	undergraduate studies	positive	corrected vision	30	children_vs_adults	larger_groups	towards_children
115	male	human	observer	passenger	27	5 to 10 years	graduate studies	very positive	corrected vision	73	children_vs_adults	smaller_groups	towards_children
115	male	human	observer	passenger	27	5 to 10 years	graduate studies	very positive	corrected vision	31	children_vs_adults	larger_groups	towards_children
043	female	human	pedestrian (smaller group/children)	pedestrian	20	none	no higher education	neutral	no impairment	38	children_vs_adults	larger_groups	towards_adults
043	female	human	pedestrian (smaller group/children)	pedestrian	20	none	no higher education	neutral	no impairment	29	children_vs_adults	smaller_groups	towards_adults
039	female	self-driving	pedestrian (smaller group/children)	pedestrian	24	5 to 10 years	no higher education	negative	no impairment	57	children_vs_adults	smaller_groups	towards_adults
039	female	self-driving	pedestrian (smaller group/children)	pedestrian	24	5 to 10 years	no higher education	negative	no impairment	60	children_vs_adults	larger_groups	towards_adults
084	female	human	passenger	passenger	25	5 to 10 years	no higher education	negative	corrected vision	41	children_vs_adults	larger_groups	towards_children
084	female	human	passenger	passenger	25	5 to 10 years	no higher education	negative	corrected vision	36	children_vs_adults	smaller_groups	towards_children
106	female	human	observer	passenger	23	5 to 10 years	undergraduate studies	neutral	no impairment	100	children_vs_adults	smaller_groups	towards_adults
106	female	human	observer	passenger	23	5 to 10 years	undergraduate studies	neutral	no impairment	78	children_vs_adults	larger_groups	towards_adults
048	female	self-driving	observer	passenger	25	none	graduate studies	neutral	corrected vision	74	children_vs_adults	larger_groups	towards_adults
048	female	self-driving	observer	passenger	25	none	graduate studies	neutral	corrected vision	90	children_vs_adults	smaller_groups	towards_adults
146	male	human	pedestrian (larger group/adults)	observer	20	1 to 5 years	no higher education	positive	corrected vision	89	children_vs_adults	larger_groups	towards_adults
146	male	human	pedestrian (larger group/adults)	observer	20	1 to 5 years	no higher education	positive	corrected vision	80	children_vs_adults	smaller_groups	towards_adults
045	male	human	pedestrian (smaller group/children)	pedestrian	23	1 to 5 years	no higher education	positive	no impairment	64	children_vs_adults	larger_groups	towards_children
045	male	human	pedestrian (smaller group/children)	pedestrian	23	1 to 5 years	no higher education	positive	no impairment	73	children_vs_adults	smaller_groups	towards_children
133	female	human	pedestrian (smaller group/children)	pedestrian	21	1 to 5 years	no higher education	very negative	corrected vision	65	children_vs_adults	smaller_groups	towards_adults
133	female	human	pedestrian (smaller group/children)	pedestrian	21	1 to 5 years	no higher education	very negative	corrected vision	50	children_vs_adults	larger_groups	towards_adults
087	female	self-driving	pedestrian (smaller group/children)	pedestrian	23	1 to 5 years	no higher education	very positive	no impairment	56	children_vs_adults	larger_groups	towards_adults
087	female	self-driving	pedestrian (smaller group/children)	pedestrian	23	1 to 5 years	no higher education	very positive	no impairment	10	children_vs_adults	smaller_groups	towards_children
175	male	self-driving	passenger	passenger	21	1 to 5 years	no higher education	positive	no impairment	70	children_vs_adults	smaller_groups	towards_children
175	male	self-driving	passenger	passenger	21	1 to 5 years	no higher education	positive	no impairment	71	children_vs_adults	larger_groups	towards_children
081	female	human	observer	observer	21	1 to 5 years	no higher education	positive	no impairment	0	children_vs_adults	smaller_groups	towards_adults
081	female	human	observer	observer	21	1 to 5 years	no higher education	positive	no impairment	0	children_vs_adults	larger_groups	towards_adults
094	female	self-driving	pedestrian (larger group/adults)	pedestrian	30	none	undergraduate studies	negative	corrected vision	7	children_vs_adults	larger_groups	towards_adults
094	female	self-driving	pedestrian (larger group/adults)	pedestrian	30	none	undergraduate studies	negative	corrected vision	51	children_vs_adults	smaller_groups	towards_adults
177	female	human	observer	observer	40	more than 10 years	graduate studies	neutral	no impairment	83	children_vs_adults	larger_groups	towards_children
177	female	human	observer	observer	40	more than 10 years	graduate studies	neutral	no impairment	53	children_vs_adults	smaller_groups	towards_adults
098	female	self-driving	observer	observer	25	5 to 10 years	graduate studies	neutral	no impairment	55	children_vs_adults	larger_groups	towards_adults
098	female	self-driving	observer	observer	25	5 to 10 years	graduate studies	neutral	no impairment	56	children_vs_adults	smaller_groups	towards_adults
071	female	human	observer	observer	20	none	no higher education	neutral	no impairment	72	children_vs_adults	smaller_groups	towards_children
071	female	human	observer	observer	20	none	no higher education	neutral	no impairment	74	children_vs_adults	larger_groups	towards_children
131	male	human	passenger	passenger	32	more than 10 years	undergraduate studies	very negative	no impairment	20	children_vs_adults	larger_groups	towards_adults
131	male	human	passenger	passenger	32	more than 10 years	undergraduate studies	very negative	no impairment	34	children_vs_adults	smaller_groups	towards_adults
017	female	self-driving	observer	observer	18	none	no higher education	negative	corrected vision	15	children_vs_adults	larger_groups	towards_adults
017	female	self-driving	observer	observer	18	none	no higher education	negative	corrected vision	20	children_vs_adults	smaller_groups	towards_children
035	male	self-driving	passenger	observer	20	1 to 5 years	no higher education	very positive	corrected vision	77	children_vs_adults	larger_groups	towards_children
035	male	self-driving	passenger	observer	20	1 to 5 years	no higher education	very positive	corrected vision	68	children_vs_adults	smaller_groups	towards_children
044	male	self-driving	observer	observer	25	5 to 10 years	no higher education	very positive	no impairment	73	children_vs_adults	smaller_groups	towards_children
044	male	self-driving	observer	observer	25	5 to 10 years	no higher education	very positive	no impairment	8	children_vs_adults	larger_groups	towards_adults
023	female	human	pedestrian (larger group/adults)	observer	22	none	no higher education	very negative	corrected vision	45	children_vs_adults	larger_groups	towards_adults
023	female	human	pedestrian (larger group/adults)	observer	22	none	no higher education	very negative	corrected vision	77	children_vs_adults	smaller_groups	towards_adults
176	male	self-driving	pedestrian (larger group/adults)	pedestrian	30	more than 10 years	no higher education	positive	corrected vision	100	children_vs_adults	larger_groups	towards_adults
176	male	self-driving	pedestrian (larger group/adults)	pedestrian	30	more than 10 years	no higher education	positive	corrected vision	100	children_vs_adults	smaller_groups	towards_adults
108	male	human	pedestrian (larger group/adults)	pedestrian	23	1 to 5 years	no higher education	positive	no impairment	91	children_vs_adults	smaller_groups	towards_adults
108	male	human	pedestrian (larger group/adults)	pedestrian	23	1 to 5 years	no higher education	positive	no impairment	73	children_vs_adults	larger_groups	towards_adults
021	female	human	passenger	observer	21	1 to 5 years	no higher education	neutral	uncorrected vision	14	children_vs_adults	smaller_groups	towards_adults
021	female	human	passenger	observer	21	1 to 5 years	no higher education	neutral	uncorrected vision	0	children_vs_adults	larger_groups	towards_adults
014	female	self-driving	passenger	observer	24	5 to 10 years	no higher education	negative	corrected vision	100	children_vs_adults	smaller_groups	towards_adults
014	female	self-driving	passenger	observer	24	5 to 10 years	no higher education	negative	corrected vision	100	children_vs_adults	larger_groups	towards_adults
052	male	self-driving	pedestrian (smaller group/children)	pedestrian	27	5 to 10 years	no higher education	negative	no impairment	40	children_vs_adults	larger_groups	towards_adults
052	male	self-driving	pedestrian (smaller group/children)	pedestrian	27	5 to 10 years	no higher education	negative	no impairment	64	children_vs_adults	smaller_groups	towards_adults
107	female	human	observer	pedestrian	23	1 to 5 years	no higher education	very negative	no impairment	66	children_vs_adults	smaller_groups	towards_adults
107	female	human	observer	pedestrian	23	1 to 5 years	no higher education	very negative	no impairment	71	children_vs_adults	larger_groups	towards_adults
004	male	self-driving	pedestrian (larger group/adults)	pedestrian	30	5 to 10 years	graduate studies	very positive	corrected vision	15	children_vs_adults	larger_groups	towards_adults
004	male	self-driving	pedestrian (larger group/adults)	pedestrian	30	5 to 10 years	graduate studies	very positive	corrected vision	0	children_vs_adults	smaller_groups	towards_children
163	male	human	observer	observer	29	none	no higher education	very positive	no impairment	19	children_vs_adults	smaller_groups	towards_adults
163	male	human	observer	observer	29	none	no higher education	very positive	no impairment	11	children_vs_adults	larger_groups	towards_adults
027	male	human	observer	observer	25	5 to 10 years	no higher education	neutral	corrected vision	62	children_vs_adults	smaller_groups	towards_adults
027	male	human	observer	observer	25	5 to 10 years	no higher education	neutral	corrected vision	82	children_vs_adults	larger_groups	towards_adults
159	female	self-driving	pedestrian (smaller group/children)	pedestrian	19	1 to 5 years	no higher education	negative	corrected vision	59	children_vs_adults	smaller_groups	towards_adults
159	female	self-driving	pedestrian (smaller group/children)	pedestrian	19	1 to 5 years	no higher education	negative	corrected vision	63	children_vs_adults	larger_groups	towards_adults
103	female	human	observer	observer	25	5 to 10 years	no higher education	neutral	no impairment	78	children_vs_adults	larger_groups	towards_adults
103	female	human	observer	observer	25	5 to 10 years	no higher education	neutral	no impairment	11	children_vs_adults	smaller_groups	towards_children
127	male	human	pedestrian (smaller group/children)	pedestrian	27	1 to 5 years	no higher education	positive	corrected vision	29	children_vs_adults	larger_groups	towards_adults
127	male	human	pedestrian (smaller group/children)	pedestrian	27	1 to 5 years	no higher education	positive	corrected vision	90	children_vs_adults	smaller_groups	towards_children
038	male	self-driving	pedestrian (larger group/adults)	pedestrian	21	none	no higher education	neutral	corrected vision	64	children_vs_adults	larger_groups	towards_children
038	male	self-driving	pedestrian (larger group/adults)	pedestrian	21	none	no higher education	neutral	corrected vision	27	children_vs_adults	smaller_groups	towards_children
064	male	human	pedestrian (smaller group/children)	pedestrian	24	1 to 5 years	no higher education	very positive	no impairment	100	children_vs_adults	smaller_groups	towards_adults
064	male	human	pedestrian (smaller group/children)	pedestrian	24	1 to 5 years	no higher education	very positive	no impairment	100	children_vs_adults	larger_groups	towards_adults
182	male	self-driving	observer	passenger	20	1 to 5 years	no higher education	negative	no impairment	13	children_vs_adults	smaller_groups	towards_adults
182	male	self-driving	observer	passenger	20	1 to 5 years	no higher education	negative	no impairment	0	children_vs_adults	larger_groups	towards_adults
074	female	human	pedestrian (larger group/adults)	observer	20	1 to 5 years	no higher education	neutral	no impairment	21	children_vs_adults	smaller_groups	towards_children
074	female	human	pedestrian (larger group/adults)	observer	20	1 to 5 years	no higher education	neutral	no impairment	5	children_vs_adults	larger_groups	towards_adults
153	male	human	passenger	passenger	21	1 to 5 years	no higher education	very positive	uncorrected vision	100	children_vs_adults	smaller_groups	towards_children
153	male	human	passenger	passenger	21	1 to 5 years	no higher education	very positive	uncorrected vision	100	children_vs_adults	larger_groups	towards_children
013	male	self-driving	pedestrian (larger group/adults)	pedestrian	47	more than 10 years	graduate studies	negative	corrected vision	100	children_vs_adults	smaller_groups	towards_children
013	male	self-driving	pedestrian (larger group/adults)	pedestrian	47	more than 10 years	graduate studies	negative	corrected vision	81	children_vs_adults	larger_groups	towards_children
040	male	self-driving	observer	observer	20	1 to 5 years	no higher education	very positive	corrected vision	72	children_vs_adults	smaller_groups	towards_children
040	male	self-driving	observer	observer	20	1 to 5 years	no higher education	very positive	corrected vision	50	children_vs_adults	larger_groups	towards_children
150	male	human	pedestrian (smaller group/children)	pedestrian	20	1 to 5 years	no higher education	very positive	corrected vision	82	children_vs_adults	larger_groups	towards_adults
150	male	human	pedestrian (smaller group/children)	pedestrian	20	1 to 5 years	no higher education	very positive	corrected vision	76	children_vs_adults	smaller_groups	towards_adults
078	male	human	observer	passenger	23	5 to 10 years	no higher education	negative	corrected vision	72	children_vs_adults	smaller_groups	towards_adults
078	male	human	observer	passenger	23	5 to 10 years	no higher education	negative	corrected vision	33	children_vs_adults	larger_groups	towards_adults
086	female	self-driving	passenger	passenger	23	1 to 5 years	no higher education	neutral	no impairment	83	children_vs_adults	larger_groups	towards_adults
086	female	self-driving	passenger	passenger	23	1 to 5 years	no higher education	neutral	no impairment	80	children_vs_adults	smaller_groups	towards_adults
003	male	self-driving	pedestrian (smaller group/children)	observer	30	more than 10 years	no higher education	negative	corrected vision	100	children_vs_adults	larger_groups	towards_adults
003	male	self-driving	pedestrian (smaller group/children)	observer	30	more than 10 years	no higher education	negative	corrected vision	100	children_vs_adults	smaller_groups	towards_adults
158	female	self-driving	passenger	passenger	19	1 to 5 years	no higher education	neutral	no impairment	28	children_vs_adults	larger_groups	towards_children
158	female	self-driving	passenger	passenger	19	1 to 5 years	no higher education	neutral	no impairment	25	children_vs_adults	smaller_groups	towards_children
047	male	self-driving	pedestrian (smaller group/children)	observer	24	5 to 10 years	no higher education	positive	no impairment	85	children_vs_adults	larger_groups	towards_adults
047	male	self-driving	pedestrian (smaller group/children)	observer	24	5 to 10 years	no higher education	positive	no impairment	0	children_vs_adults	smaller_groups	towards_adults
155	female	human	pedestrian (larger group/adults)	pedestrian	30	none	no higher education	neutral	corrected vision	77	children_vs_adults	larger_groups	towards_adults
155	female	human	pedestrian (larger group/adults)	pedestrian	30	none	no higher education	neutral	corrected vision	50	children_vs_adults	smaller_groups	towards_adults
154	female	human	pedestrian (smaller group/children)	pedestrian	19	1 to 5 years	no higher education	negative	no impairment	91	children_vs_adults	larger_groups	towards_adults
154	female	human	pedestrian (smaller group/children)	pedestrian	19	1 to 5 years	no higher education	negative	no impairment	79	children_vs_adults	smaller_groups	towards_adults
092	male	human	pedestrian (larger group/adults)	pedestrian	20	1 to 5 years	no higher education	positive	no impairment	36	children_vs_adults	smaller_groups	towards_adults
092	male	human	pedestrian (larger group/adults)	pedestrian	20	1 to 5 years	no higher education	positive	no impairment	22	children_vs_adults	larger_groups	towards_children
119	male	human	pedestrian (smaller group/children)	observer	19	1 to 5 years	no higher education	neutral	no impairment	78	children_vs_adults	larger_groups	towards_adults
119	male	human	pedestrian (smaller group/children)	observer	19	1 to 5 years	no higher education	neutral	no impairment	97	children_vs_adults	smaller_groups	towards_adults
143	female	self-driving	pedestrian (larger group/adults)	passenger	21	1 to 5 years	no higher education	neutral	corrected vision	50	children_vs_adults	larger_groups	towards_adults
143	female	self-driving	pedestrian (larger group/adults)	passenger	21	1 to 5 years	no higher education	neutral	corrected vision	73	children_vs_adults	smaller_groups	towards_adults
167	male	human	pedestrian (larger group/adults)	pedestrian	25	5 to 10 years	undergraduate studies	positive	no impairment	36	children_vs_adults	smaller_groups	towards_adults
167	male	human	pedestrian (larger group/adults)	pedestrian	25	5 to 10 years	undergraduate studies	positive	no impairment	34	children_vs_adults	larger_groups	towards_adults
136	female	human	passenger	observer	19	none	no higher education	neutral	uncorrected vision	39	children_vs_adults	smaller_groups	towards_adults
136	female	human	passenger	observer	19	none	no higher education	neutral	uncorrected vision	33	children_vs_adults	larger_groups	towards_adults
141	male	human	pedestrian (larger group/adults)	observer	22	5 to 10 years	no higher education	very negative	no impairment	66	children_vs_adults	larger_groups	towards_children
141	male	human	pedestrian (larger group/adults)	observer	22	5 to 10 years	no higher education	very negative	no impairment	66	children_vs_adults	smaller_groups	towards_adults
033	female	human	pedestrian (larger group/adults)	observer	19	1 to 5 years	no higher education	very positive	uncorrected vision	60	children_vs_adults	smaller_groups	towards_adults
033	female	human	pedestrian (larger group/adults)	observer	19	1 to 5 years	no higher education	very positive	uncorrected vision	68	children_vs_adults	larger_groups	towards_adults
088	female	self-driving	pedestrian (larger group/adults)	pedestrian	19	1 to 5 years	no higher education	negative	no impairment	37	children_vs_adults	smaller_groups	towards_children
088	female	self-driving	pedestrian (larger group/adults)	pedestrian	19	1 to 5 years	no higher education	negative	no impairment	42	children_vs_adults	larger_groups	towards_children
114	female	self-driving	pedestrian (smaller group/children)	pedestrian	19	1 to 5 years	no higher education	neutral	corrected vision	77	children_vs_adults	larger_groups	towards_adults
114	female	self-driving	pedestrian (smaller group/children)	pedestrian	19	1 to 5 years	no higher education	neutral	corrected vision	68	children_vs_adults	smaller_groups	towards_adults
005	female	self-driving	pedestrian (smaller group/children)	pedestrian	21	1 to 5 years	no higher education	neutral	no impairment	0	children_vs_adults	larger_groups	towards_adults
005	female	self-driving	pedestrian (smaller group/children)	pedestrian	21	1 to 5 years	no higher education	neutral	no impairment	0	children_vs_adults	smaller_groups	towards_adults
002	male	self-driving	passenger	passenger	27	5 to 10 years	undergraduate studies	positive	no impairment	5	children_vs_adults	smaller_groups	towards_children
002	male	self-driving	passenger	passenger	27	5 to 10 years	undergraduate studies	positive	no impairment	0	children_vs_adults	larger_groups	towards_children
164	male	human	pedestrian (smaller group/children)	pedestrian	26	5 to 10 years	no higher education	very positive	no impairment	75	children_vs_adults	smaller_groups	towards_adults
164	male	human	pedestrian (smaller group/children)	pedestrian	26	5 to 10 years	no higher education	very positive	no impairment	46	children_vs_adults	larger_groups	towards_adults
065	male	human	pedestrian (smaller group/children)	observer	23	none	no higher education	very positive	no impairment	28	children_vs_adults	smaller_groups	towards_adults
065	male	human	pedestrian (smaller group/children)	observer	23	none	no higher education	very positive	no impairment	88	children_vs_adults	larger_groups	towards_children
112	male	self-driving	passenger	pedestrian	20	1 to 5 years	no higher education	very positive	no impairment	32	children_vs_adults	smaller_groups	towards_adults
112	male	self-driving	passenger	pedestrian	20	1 to 5 years	no higher education	very positive	no impairment	15	children_vs_adults	larger_groups	towards_adults
180	female	human	pedestrian (larger group/adults)	observer	18	1 to 5 years	no higher education	negative	corrected vision	57	children_vs_adults	larger_groups	towards_adults
180	female	human	pedestrian (larger group/adults)	observer	18	1 to 5 years	no higher education	negative	corrected vision	67	children_vs_adults	smaller_groups	towards_adults
166	female	human	pedestrian (smaller group/children)	passenger	19	1 to 5 years	no higher education	neutral	corrected vision	26	children_vs_adults	larger_groups	towards_adults
166	female	human	pedestrian (smaller group/children)	passenger	19	1 to 5 years	no higher education	neutral	corrected vision	41	children_vs_adults	smaller_groups	towards_children
099	female	self-driving	pedestrian (smaller group/children)	pedestrian	20	1 to 5 years	no higher education	positive	no impairment	77	children_vs_adults	smaller_groups	towards_adults
099	female	self-driving	pedestrian (smaller group/children)	pedestrian	20	1 to 5 years	no higher education	positive	no impairment	40	children_vs_adults	larger_groups	towards_children
113	male	self-driving	pedestrian (larger group/adults)	pedestrian	24	5 to 10 years	no higher education	very positive	no impairment	50	children_vs_adults	smaller_groups	towards_adults
113	male	self-driving	pedestrian (larger group/adults)	pedestrian	24	5 to 10 years	no higher education	very positive	no impairment	50	children_vs_adults	larger_groups	towards_adults
049	female	self-driving	pedestrian (larger group/adults)	pedestrian	20	1 to 5 years	no higher education	positive	no impairment	100	children_vs_adults	larger_groups	towards_adults
049	female	self-driving	pedestrian (larger group/adults)	pedestrian	20	1 to 5 years	no higher education	positive	no impairment	100	children_vs_adults	smaller_groups	towards_adults
083	male	self-driving	pedestrian (smaller group/children)	pedestrian	22	none	no higher education	very positive	no impairment	100	children_vs_adults	larger_groups	towards_children
083	male	self-driving	pedestrian (smaller group/children)	pedestrian	22	none	no higher education	very positive	no impairment	76	children_vs_adults	smaller_groups	towards_children
121	male	human	passenger	passenger	19	1 to 5 years	no higher education	positive	no impairment	20	children_vs_adults	larger_groups	towards_adults
121	male	human	passenger	passenger	19	1 to 5 years	no higher education	positive	no impairment	40	children_vs_adults	smaller_groups	towards_adults
147	female	human	pedestrian (larger group/adults)	pedestrian	18	1 to 5 years	no higher education	negative	corrected vision	83	children_vs_adults	smaller_groups	towards_adults
147	female	human	pedestrian (larger group/adults)	pedestrian	18	1 to 5 years	no higher education	negative	corrected vision	91	children_vs_adults	larger_groups	towards_adults
111	female	self-driving	pedestrian (larger group/adults)	pedestrian	23	5 to 10 years	no higher education	neutral	uncorrected vision	14	children_vs_adults	larger_groups	towards_adults
111	female	self-driving	pedestrian (larger group/adults)	pedestrian	23	5 to 10 years	no higher education	neutral	uncorrected vision	32	children_vs_adults	smaller_groups	towards_children
008	female	human	pedestrian (larger group/adults)	pedestrian	24	5 to 10 years	undergraduate studies	neutral	no impairment	83	children_vs_adults	smaller_groups	towards_adults
008	female	human	pedestrian (larger group/adults)	pedestrian	24	5 to 10 years	undergraduate studies	neutral	no impairment	0	children_vs_adults	larger_groups	towards_children
015	male	human	passenger	observer	26	5 to 10 years	no higher education	very positive	no impairment	37	children_vs_adults	larger_groups	towards_adults
015	male	human	passenger	observer	26	5 to 10 years	no higher education	very positive	no impairment	69	children_vs_adults	smaller_groups	towards_adults
079	female	self-driving	observer	observer	25	5 to 10 years	no higher education	positive	corrected vision	11	children_vs_adults	smaller_groups	towards_children
079	female	self-driving	observer	observer	25	5 to 10 years	no higher education	positive	corrected vision	18	children_vs_adults	larger_groups	towards_children
041	male	self-driving	pedestrian (smaller group/children)	pedestrian	22	1 to 5 years	no higher education	very positive	no impairment	71	children_vs_adults	smaller_groups	towards_adults
041	male	self-driving	pedestrian (smaller group/children)	pedestrian	22	1 to 5 years	no higher education	very positive	no impairment	73	children_vs_adults	larger_groups	towards_children
057	male	human	observer	observer	21	1 to 5 years	no higher education	very positive	no impairment	32	children_vs_adults	larger_groups	towards_adults
057	male	human	observer	observer	21	1 to 5 years	no higher education	very positive	no impairment	50	children_vs_adults	smaller_groups	towards_adults
171	male	human	pedestrian (smaller group/children)	pedestrian	19	1 to 5 years	no higher education	positive	no impairment	66	children_vs_adults	larger_groups	towards_adults
171	male	human	pedestrian (smaller group/children)	pedestrian	19	1 to 5 years	no higher education	positive	no impairment	65	children_vs_adults	smaller_groups	towards_adults
029	male	self-driving	pedestrian (larger group/road)	observer	21	1 to 5 years	no higher education	positive	no impairment	39	sidewalk_vs_road	larger_groups	endanger_sidewalk
029	male	self-driving	pedestrian (larger group/road)	observer	21	1 to 5 years	no higher education	positive	no impairment	77	sidewalk_vs_road	smaller_groups	endanger_road
059	male	self-driving	passenger	passenger	19	none	no higher education	very positive	corrected vision	100	sidewalk_vs_road	larger_groups	endanger_sidewalk
059	male	self-driving	passenger	passenger	19	none	no higher education	very positive	corrected vision	92	sidewalk_vs_road	smaller_groups	endanger_sidewalk
010	female	human	passenger	observer	21	1 to 5 years	no higher education	very positive	no impairment	80	sidewalk_vs_road	larger_groups	endanger_sidewalk
010	female	human	passenger	observer	21	1 to 5 years	no higher education	very positive	no impairment	83	sidewalk_vs_road	smaller_groups	endanger_sidewalk
022	female	self-driving	passenger	passenger	24	5 to 10 years	no higher education	positive	no impairment	97	sidewalk_vs_road	larger_groups	endanger_sidewalk
022	female	self-driving	passenger	passenger	24	5 to 10 years	no higher education	positive	no impairment	100	sidewalk_vs_road	smaller_groups	endanger_sidewalk
001	female	self-driving	pedestrian (larger group/road)	observer	24	5 to 10 years	undergraduate studies	negative	no impairment	59	sidewalk_vs_road	larger_groups	endanger_sidewalk
001	female	self-driving	pedestrian (larger group/road)	observer	24	5 to 10 years	undergraduate studies	negative	no impairment	50	sidewalk_vs_road	smaller_groups	endanger_sidewalk
019	male	self-driving	observer	observer	21	none	no higher education	very positive	no impairment	64	sidewalk_vs_road	smaller_groups	endanger_road
019	male	self-driving	observer	observer	21	none	no higher education	very positive	no impairment	50	sidewalk_vs_road	larger_groups	endanger_road
152	female	self-driving	observer	observer	25	5 to 10 years	undergraduate studies	neutral	no impairment	33	sidewalk_vs_road	larger_groups	endanger_road
152	female	self-driving	observer	observer	25	5 to 10 years	undergraduate studies	neutral	no impairment	60	sidewalk_vs_road	smaller_groups	endanger_sidewalk
009	male	human	observer	pedestrian	26	none	undergraduate studies	neutral	corrected vision	32	sidewalk_vs_road	smaller_groups	endanger_sidewalk
009	male	human	observer	pedestrian	26	none	undergraduate studies	neutral	corrected vision	39	sidewalk_vs_road	larger_groups	endanger_sidewalk
184	male	human	pedestrian (larger group/road)	pedestrian	27	more than 10 years	no higher education	very positive	corrected vision	38	sidewalk_vs_road	larger_groups	endanger_sidewalk
184	male	human	pedestrian (larger group/road)	pedestrian	27	more than 10 years	no higher education	very positive	corrected vision	75	sidewalk_vs_road	smaller_groups	endanger_sidewalk
145	female	human	passenger	passenger	19	1 to 5 years	no higher education	very negative	no impairment	14	sidewalk_vs_road	smaller_groups	endanger_sidewalk
145	female	human	passenger	passenger	19	1 to 5 years	no higher education	very negative	no impairment	30	sidewalk_vs_road	larger_groups	endanger_sidewalk
132	male	human	observer	observer	23	5 to 10 years	no higher education	positive	no impairment	14	sidewalk_vs_road	larger_groups	endanger_sidewalk
132	male	human	observer	observer	23	5 to 10 years	no higher education	positive	no impairment	21	sidewalk_vs_road	smaller_groups	endanger_sidewalk
090	male	human	passenger	passenger	20	1 to 5 years	no higher education	positive	uncorrected vision	60	sidewalk_vs_road	smaller_groups	endanger_road
090	male	human	passenger	passenger	20	1 to 5 years	no higher education	positive	uncorrected vision	64	sidewalk_vs_road	larger_groups	endanger_sidewalk
063	female	human	pedestrian (smaller group/sidewalk)	pedestrian	26	1 to 5 years	undergraduate studies	negative	corrected vision	100	sidewalk_vs_road	larger_groups	endanger_road
063	female	human	pedestrian (smaller group/sidewalk)	pedestrian	26	1 to 5 years	undergraduate studies	negative	corrected vision	100	sidewalk_vs_road	smaller_groups	endanger_road
093	male	human	observer	observer	22	5 to 10 years	no higher education	positive	no impairment	0	sidewalk_vs_road	larger_groups	endanger_sidewalk
093	male	human	observer	observer	22	5 to 10 years	no higher education	positive	no impairment	3	sidewalk_vs_road	smaller_groups	endanger_sidewalk
138	female	self-driving	pedestrian (smaller group/sidewalk)	pedestrian	22	1 to 5 years	no higher education	negative	corrected vision	81	sidewalk_vs_road	smaller_groups	endanger_sidewalk
138	female	self-driving	pedestrian (smaller group/sidewalk)	pedestrian	22	1 to 5 years	no higher education	negative	corrected vision	72	sidewalk_vs_road	larger_groups	endanger_sidewalk
105	male	human	pedestrian (larger group/road)	pedestrian	26	5 to 10 years	undergraduate studies	very positive	no impairment	70	sidewalk_vs_road	smaller_groups	endanger_sidewalk
105	male	human	pedestrian (larger group/road)	pedestrian	26	5 to 10 years	undergraduate studies	very positive	no impairment	73	sidewalk_vs_road	larger_groups	endanger_sidewalk
018	male	human	passenger	pedestrian	21	1 to 5 years	no higher education	positive	no impairment	58	sidewalk_vs_road	larger_groups	endanger_sidewalk
018	male	human	passenger	pedestrian	21	1 to 5 years	no higher education	positive	no impairment	69	sidewalk_vs_road	smaller_groups	endanger_sidewalk
130	female	self-driving	passenger	passenger	20	1 to 5 years	no higher education	positive	no impairment	93	sidewalk_vs_road	larger_groups	endanger_sidewalk
130	female	self-driving	passenger	passenger	20	1 to 5 years	no higher education	positive	no impairment	95	sidewalk_vs_road	smaller_groups	endanger_sidewalk
030	female	human	passenger	passenger	21	1 to 5 years	no higher education	very positive	corrected vision	55	sidewalk_vs_road	smaller_groups	endanger_road
030	female	human	passenger	passenger	21	1 to 5 years	no higher education	very positive	corrected vision	6	sidewalk_vs_road	larger_groups	endanger_sidewalk
097	male	self-driving	observer	pedestrian	20	none	no higher education	positive	no impairment	29	sidewalk_vs_road	larger_groups	endanger_road
097	male	self-driving	observer	pedestrian	20	none	no higher education	positive	no impairment	40	sidewalk_vs_road	smaller_groups	endanger_road
128	female	self-driving	observer	observer	24	1 to 5 years	undergraduate studies	negative	corrected vision	28	sidewalk_vs_road	larger_groups	endanger_road
128	female	self-driving	observer	observer	24	1 to 5 years	undergraduate studies	negative	corrected vision	50	sidewalk_vs_road	smaller_groups	endanger_road
179	male	human	passenger	passenger	23	5 to 10 years	no higher education	positive	no impairment	86	sidewalk_vs_road	smaller_groups	endanger_sidewalk
179	male	human	passenger	passenger	23	5 to 10 years	no higher education	positive	no impairment	74	sidewalk_vs_road	larger_groups	endanger_sidewalk
089	male	human	pedestrian (smaller group/sidewalk)	observer	26	5 to 10 years	no higher education	very positive	no impairment	100	sidewalk_vs_road	larger_groups	endanger_sidewalk
089	male	human	pedestrian (smaller group/sidewalk)	observer	26	5 to 10 years	no higher education	very positive	no impairment	59	sidewalk_vs_road	smaller_groups	endanger_road
183	female	human	pedestrian (larger group/road)	observer	24	1 to 5 years	undergraduate studies	neutral	no impairment	0	sidewalk_vs_road	smaller_groups	endanger_road
183	female	human	pedestrian (larger group/road)	observer	24	1 to 5 years	undergraduate studies	neutral	no impairment	0	sidewalk_vs_road	larger_groups	endanger_road
077	female	self-driving	passenger	passenger	21	none	undergraduate studies	very negative	corrected vision	100	sidewalk_vs_road	smaller_groups	endanger_sidewalk
077	female	self-driving	passenger	passenger	21	none	undergraduate studies	very negative	corrected vision	100	sidewalk_vs_road	larger_groups	endanger_sidewalk
168	female	human	pedestrian (smaller group/sidewalk)	pedestrian	19	1 to 5 years	no higher education	neutral	no impairment	20	sidewalk_vs_road	larger_groups	endanger_sidewalk
168	female	human	pedestrian (smaller group/sidewalk)	pedestrian	19	1 to 5 years	no higher education	neutral	no impairment	61	sidewalk_vs_road	smaller_groups	endanger_sidewalk
058	female	self-driving	pedestrian (larger group/road)	pedestrian	28	more than 10 years	undergraduate studies	negative	uncorrected vision	100	sidewalk_vs_road	larger_groups	endanger_sidewalk
058	female	self-driving	pedestrian (larger group/road)	pedestrian	28	more than 10 years	undergraduate studies	negative	uncorrected vision	100	sidewalk_vs_road	smaller_groups	endanger_sidewalk
118	female	self-driving	passenger	passenger	21	1 to 5 years	no higher education	positive	no impairment	53	sidewalk_vs_road	larger_groups	endanger_sidewalk
118	female	self-driving	passenger	passenger	21	1 to 5 years	no higher education	positive	no impairment	74	sidewalk_vs_road	smaller_groups	endanger_sidewalk
172	male	human	pedestrian (smaller group/sidewalk)	pedestrian	22	1 to 5 years	no higher education	neutral	no impairment	12	sidewalk_vs_road	larger_groups	endanger_road
172	male	human	pedestrian (smaller group/sidewalk)	pedestrian	22	1 to 5 years	no higher education	neutral	no impairment	24	sidewalk_vs_road	smaller_groups	endanger_road
124	female	self-driving	passenger	passenger	20	1 to 5 years	no higher education	positive	corrected vision	66	sidewalk_vs_road	larger_groups	endanger_road
124	female	self-driving	passenger	passenger	20	1 to 5 years	no higher education	positive	corrected vision	83	sidewalk_vs_road	smaller_groups	endanger_road
157	male	self-driving	passenger	pedestrian	20	1 to 5 years	no higher education	positive	no impairment	49	sidewalk_vs_road	smaller_groups	endanger_sidewalk
157	male	self-driving	passenger	pedestrian	20	1 to 5 years	no higher education	positive	no impairment	47	sidewalk_vs_road	larger_groups	endanger_sidewalk
075	female	self-driving	passenger	passenger	21	1 to 5 years	no higher education	negative	corrected vision	72	sidewalk_vs_road	smaller_groups	endanger_sidewalk
075	female	self-driving	passenger	passenger	21	1 to 5 years	no higher education	negative	corrected vision	82	sidewalk_vs_road	larger_groups	endanger_sidewalk
129	female	self-driving	passenger	passenger	21	none	no higher education	neutral	no impairment	74	sidewalk_vs_road	smaller_groups	endanger_sidewalk
129	female	self-driving	passenger	passenger	21	none	no higher education	neutral	no impairment	73	sidewalk_vs_road	larger_groups	endanger_sidewalk
028	male	self-driving	observer	passenger	30	more than 10 years	undergraduate studies	negative	corrected vision	100	sidewalk_vs_road	larger_groups	endanger_road
028	male	self-driving	observer	passenger	30	more than 10 years	undergraduate studies	negative	corrected vision	100	sidewalk_vs_road	smaller_groups	endanger_road
102	female	human	pedestrian (smaller group/sidewalk)	pedestrian	47	more than 10 years	no higher education	negative	no impairment	50	sidewalk_vs_road	smaller_groups	endanger_sidewalk
102	female	human	pedestrian (smaller group/sidewalk)	pedestrian	47	more than 10 years	no higher education	negative	no impairment	50	sidewalk_vs_road	larger_groups	endanger_sidewalk
181	male	self-driving	pedestrian (larger group/road)	passenger	25	1 to 5 years	no higher education	neutral	no impairment	31	sidewalk_vs_road	larger_groups	endanger_road
181	male	self-driving	pedestrian (larger group/road)	passenger	25	1 to 5 years	no higher education	neutral	no impairment	29	sidewalk_vs_road	smaller_groups	endanger_road
024	female	self-driving	pedestrian (larger group/road)	pedestrian	23	1 to 5 years	undergraduate studies	positive	no impairment	74	sidewalk_vs_road	smaller_groups	endanger_sidewalk
024	female	self-driving	pedestrian (larger group/road)	pedestrian	23	1 to 5 years	undergraduate studies	positive	no impairment	75	sidewalk_vs_road	larger_groups	endanger_sidewalk
085	male	self-driving	passenger	passenger	26	5 to 10 years	undergraduate studies	very positive	no impairment	75	sidewalk_vs_road	smaller_groups	endanger_sidewalk
085	male	self-driving	passenger	passenger	26	5 to 10 years	undergraduate studies	very positive	no impairment	66	sidewalk_vs_road	larger_groups	endanger_sidewalk
069	female	self-driving	observer	observer	26	5 to 10 years	graduate studies	positive	corrected vision	47	sidewalk_vs_road	smaller_groups	endanger_sidewalk
069	female	self-driving	observer	observer	26	5 to 10 years	graduate studies	positive	corrected vision	59	sidewalk_vs_road	larger_groups	endanger_sidewalk
123	male	human	passenger	passenger	20	1 to 5 years	no higher education	very positive	no impairment	100	sidewalk_vs_road	smaller_groups	endanger_sidewalk
123	male	human	passenger	passenger	20	1 to 5 years	no higher education	very positive	no impairment	100	sidewalk_vs_road	larger_groups	endanger_sidewalk
066	male	self-driving	pedestrian (smaller group/sidewalk)	observer	23	5 to 10 years	no higher education	positive	no impairment	100	sidewalk_vs_road	smaller_groups	endanger_sidewalk
066	male	self-driving	pedestrian (smaller group/sidewalk)	observer	23	5 to 10 years	no higher education	positive	no impairment	100	sidewalk_vs_road	larger_groups	endanger_sidewalk
076	male	human	observer	passenger	22	1 to 5 years	no higher education	positive	corrected vision	65	sidewalk_vs_road	larger_groups	endanger_sidewalk
076	male	human	observer	passenger	22	1 to 5 years	no higher education	positive	corrected vision	64	sidewalk_vs_road	smaller_groups	endanger_road
169	male	human	passenger	passenger	18	1 to 5 years	no higher education	positive	corrected vision	58	sidewalk_vs_road	smaller_groups	endanger_sidewalk
169	male	human	passenger	passenger	18	1 to 5 years	no higher education	positive	corrected vision	54	sidewalk_vs_road	larger_groups	endanger_sidewalk
096	female	self-driving	passenger	passenger	21	1 to 5 years	no higher education	negative	uncorrected vision	26	sidewalk_vs_road	smaller_groups	endanger_sidewalk
096	female	self-driving	passenger	passenger	21	1 to 5 years	no higher education	negative	uncorrected vision	27	sidewalk_vs_road	larger_groups	endanger_sidewalk
170	female	human	passenger	passenger	20	1 to 5 years	no higher education	negative	no impairment	31	sidewalk_vs_road	smaller_groups	endanger_sidewalk
170	female	human	passenger	passenger	20	1 to 5 years	no higher education	negative	no impairment	77	sidewalk_vs_road	larger_groups	endanger_sidewalk
042	female	human	pedestrian (larger group/road)	observer	24	5 to 10 years	no higher education	negative	no impairment	0	sidewalk_vs_road	smaller_groups	endanger_sidewalk
042	female	human	pedestrian (larger group/road)	observer	24	5 to 10 years	no higher education	negative	no impairment	29	sidewalk_vs_road	larger_groups	endanger_sidewalk
011	male	self-driving	passenger	passenger	25	none	no higher education	negative	no impairment	73	sidewalk_vs_road	smaller_groups	endanger_sidewalk
011	male	self-driving	passenger	passenger	25	none	no higher education	negative	no impairment	71	sidewalk_vs_road	larger_groups	endanger_sidewalk
034	female	human	pedestrian (larger group/road)	observer	24	5 to 10 years	undergraduate studies	neutral	corrected vision	8	sidewalk_vs_road	larger_groups	endanger_road
034	female	human	pedestrian (larger group/road)	observer	24	5 to 10 years	undergraduate studies	neutral	corrected vision	9	sidewalk_vs_road	smaller_groups	endanger_road
072	male	self-driving	observer	observer	23	1 to 5 years	no higher education	positive	uncorrected vision	78	sidewalk_vs_road	larger_groups	endanger_sidewalk
072	male	self-driving	observer	observer	23	1 to 5 years	no higher education	positive	uncorrected vision	78	sidewalk_vs_road	smaller_groups	endanger_sidewalk
178	male	self-driving	pedestrian (smaller group/sidewalk)	observer	24	1 to 5 years	no higher education	very positive	corrected vision	100	sidewalk_vs_road	larger_groups	endanger_road
178	male	self-driving	pedestrian (smaller group/sidewalk)	observer	24	1 to 5 years	no higher education	very positive	corrected vision	79	sidewalk_vs_road	smaller_groups	endanger_road
151	male	self-driving	passenger	passenger	19	1 to 5 years	no higher education	positive	corrected vision	8	sidewalk_vs_road	smaller_groups	endanger_sidewalk
151	male	self-driving	passenger	passenger	19	1 to 5 years	no higher education	positive	corrected vision	71	sidewalk_vs_road	larger_groups	endanger_sidewalk
110	female	self-driving	pedestrian (larger group/road)	pedestrian	23	5 to 10 years	undergraduate studies	neutral	no impairment	50	sidewalk_vs_road	larger_groups	endanger_sidewalk
110	female	self-driving	pedestrian (larger group/road)	pedestrian	23	5 to 10 years	undergraduate studies	neutral	no impairment	31	sidewalk_vs_road	smaller_groups	endanger_sidewalk
149	male	human	observer	passenger	24	5 to 10 years	no higher education	positive	no impairment	29	sidewalk_vs_road	smaller_groups	endanger_road
149	male	human	observer	passenger	24	5 to 10 years	no higher education	positive	no impairment	11	sidewalk_vs_road	larger_groups	endanger_road
073	male	human	observer	observer	21	none	no higher education	very positive	no impairment	16	sidewalk_vs_road	larger_groups	endanger_road
073	male	human	observer	observer	21	none	no higher education	very positive	no impairment	13	sidewalk_vs_road	smaller_groups	endanger_road
031	male	self-driving	pedestrian (smaller group/sidewalk)	pedestrian	22	5 to 10 years	no higher education	positive	corrected vision	86	sidewalk_vs_road	smaller_groups	endanger_sidewalk
031	male	self-driving	pedestrian (smaller group/sidewalk)	pedestrian	22	5 to 10 years	no higher education	positive	corrected vision	81	sidewalk_vs_road	larger_groups	endanger_sidewalk
050	female	human	observer	passenger	22	5 to 10 years	undergraduate studies	positive	no impairment	100	sidewalk_vs_road	smaller_groups	endanger_sidewalk
050	female	human	observer	passenger	22	5 to 10 years	undergraduate studies	positive	no impairment	100	sidewalk_vs_road	larger_groups	endanger_sidewalk
116	male	human	pedestrian (larger group/road)	observer	26	none	undergraduate studies	positive	corrected vision	23	sidewalk_vs_road	larger_groups	endanger_sidewalk
116	male	human	pedestrian (larger group/road)	observer	26	none	undergraduate studies	positive	corrected vision	100	sidewalk_vs_road	smaller_groups	endanger_road
020	male	self-driving	pedestrian (smaller group/sidewalk)	observer	27	5 to 10 years	no higher education	very positive	corrected vision	100	sidewalk_vs_road	smaller_groups	endanger_road
020	male	self-driving	pedestrian (smaller group/sidewalk)	observer	27	5 to 10 years	no higher education	very positive	corrected vision	100	sidewalk_vs_road	larger_groups	endanger_road
142	male	self-driving	observer	observer	19	1 to 5 years	no higher education	positive	no impairment	31	sidewalk_vs_road	smaller_groups	endanger_road
142	male	self-driving	observer	observer	19	1 to 5 years	no higher education	positive	no impairment	67	sidewalk_vs_road	larger_groups	endanger_road
082	female	human	pedestrian (smaller group/sidewalk)	observer	20	1 to 5 years	no higher education	neutral	corrected vision	100	sidewalk_vs_road	larger_groups	endanger_sidewalk
082	female	human	pedestrian (smaller group/sidewalk)	observer	20	1 to 5 years	no higher education	neutral	corrected vision	100	sidewalk_vs_road	smaller_groups	endanger_road
062	female	self-driving	pedestrian (smaller group/sidewalk)	observer	22	1 to 5 years	undergraduate studies	negative	no impairment	50	sidewalk_vs_road	larger_groups	endanger_road
062	female	self-driving	pedestrian (smaller group/sidewalk)	observer	22	1 to 5 years	undergraduate studies	negative	no impairment	76	sidewalk_vs_road	smaller_groups	endanger_road
140	female	self-driving	pedestrian (smaller group/sidewalk)	observer	22	5 to 10 years	no higher education	positive	no impairment	66	sidewalk_vs_road	smaller_groups	endanger_sidewalk
140	female	self-driving	pedestrian (smaller group/sidewalk)	observer	22	5 to 10 years	no higher education	positive	no impairment	68	sidewalk_vs_road	larger_groups	endanger_sidewalk
036	male	self-driving	pedestrian (smaller group/sidewalk)	pedestrian	20	1 to 5 years	no higher education	positive	no impairment	100	sidewalk_vs_road	larger_groups	endanger_sidewalk
036	male	self-driving	pedestrian (smaller group/sidewalk)	pedestrian	20	1 to 5 years	no higher education	positive	no impairment	100	sidewalk_vs_road	smaller_groups	endanger_sidewalk
012	female	self-driving	observer	observer	19	1 to 5 years	no higher education	very negative	no impairment	80	sidewalk_vs_road	smaller_groups	endanger_road
012	female	self-driving	observer	observer	19	1 to 5 years	no higher education	very negative	no impairment	76	sidewalk_vs_road	larger_groups	endanger_sidewalk
032	female	human	pedestrian (smaller group/sidewalk)	pedestrian	29	more than 10 years	no higher education	positive	uncorrected vision	31	sidewalk_vs_road	smaller_groups	endanger_sidewalk
032	female	human	pedestrian (smaller group/sidewalk)	pedestrian	29	more than 10 years	no higher education	positive	uncorrected vision	0	sidewalk_vs_road	larger_groups	endanger_sidewalk
006	female	human	pedestrian (larger group/road)	observer	24	none	undergraduate studies	positive	corrected vision	50	sidewalk_vs_road	smaller_groups	endanger_sidewalk
006	female	human	pedestrian (larger group/road)	observer	24	none	undergraduate studies	positive	corrected vision	88	sidewalk_vs_road	larger_groups	endanger_sidewalk
025	male	self-driving	observer	pedestrian	20	1 to 5 years	no higher education	negative	corrected vision	100	sidewalk_vs_road	larger_groups	endanger_sidewalk
025	male	self-driving	observer	pedestrian	20	1 to 5 years	no higher education	negative	corrected vision	13	sidewalk_vs_road	smaller_groups	endanger_road
100	male	self-driving	pedestrian (smaller group/sidewalk)	observer	22	1 to 5 years	undergraduate studies	very positive	no impairment	70	sidewalk_vs_road	smaller_groups	endanger_road
100	male	self-driving	pedestrian (smaller group/sidewalk)	observer	22	1 to 5 years	undergraduate studies	very positive	no impairment	63	sidewalk_vs_road	larger_groups	endanger_road
007	female	human	observer	passenger	20	none	no higher education	negative	no impairment	0	sidewalk_vs_road	smaller_groups	endanger_sidewalk
007	female	human	observer	passenger	20	none	no higher education	negative	no impairment	0	sidewalk_vs_road	larger_groups	endanger_sidewalk
070	male	self-driving	pedestrian (larger group/road)	pedestrian	22	none	no higher education	positive	corrected vision	50	sidewalk_vs_road	smaller_groups	endanger_sidewalk
070	male	self-driving	pedestrian (larger group/road)	pedestrian	22	none	no higher education	positive	corrected vision	35	sidewalk_vs_road	larger_groups	endanger_sidewalk
144	male	self-driving	pedestrian (larger group/road)	observer	20	1 to 5 years	no higher education	neutral	uncorrected vision	81	sidewalk_vs_road	larger_groups	endanger_road
144	male	self-driving	pedestrian (larger group/road)	observer	20	1 to 5 years	no higher education	neutral	uncorrected vision	69	sidewalk_vs_road	smaller_groups	endanger_sidewalk
091	male	human	pedestrian (smaller group/sidewalk)	pedestrian	28	none	undergraduate studies	very positive	no impairment	0	sidewalk_vs_road	smaller_groups	endanger_sidewalk
091	male	human	pedestrian (smaller group/sidewalk)	pedestrian	28	none	undergraduate studies	very positive	no impairment	0	sidewalk_vs_road	larger_groups	endanger_sidewalk
080	female	self-driving	observer	observer	20	1 to 5 years	no higher education	positive	no impairment	80	sidewalk_vs_road	smaller_groups	endanger_sidewalk
080	female	self-driving	observer	observer	20	1 to 5 years	no higher education	positive	no impairment	66	sidewalk_vs_road	larger_groups	endanger_sidewalk
126	female	human	passenger	passenger	21	1 to 5 years	no higher education	negative	corrected vision	100	sidewalk_vs_road	larger_groups	endanger_sidewalk
126	female	human	passenger	passenger	21	1 to 5 years	no higher education	negative	corrected vision	100	sidewalk_vs_road	smaller_groups	endanger_sidewalk
173	male	self-driving	observer	pedestrian	30	5 to 10 years	undergraduate studies	very positive	no impairment	0	sidewalk_vs_road	larger_groups	endanger_road
173	male	self-driving	observer	pedestrian	30	5 to 10 years	undergraduate studies	very positive	no impairment	50	sidewalk_vs_road	smaller_groups	endanger_sidewalk
162	male	self-driving	passenger	passenger	22	1 to 5 years	no higher education	very positive	uncorrected vision	59	sidewalk_vs_road	larger_groups	endanger_sidewalk
162	male	self-driving	passenger	passenger	22	1 to 5 years	no higher education	very positive	uncorrected vision	71	sidewalk_vs_road	smaller_groups	endanger_sidewalk
134	male	self-driving	passenger	passenger	20	1 to 5 years	no higher education	very negative	no impairment	87	sidewalk_vs_road	larger_groups	endanger_road
134	male	self-driving	passenger	passenger	20	1 to 5 years	no higher education	very negative	no impairment	76	sidewalk_vs_road	smaller_groups	endanger_road
067	male	human	observer	observer	20	1 to 5 years	no higher education	positive	no impairment	100	sidewalk_vs_road	smaller_groups	endanger_sidewalk
067	male	human	observer	observer	20	1 to 5 years	no higher education	positive	no impairment	92	sidewalk_vs_road	larger_groups	endanger_sidewalk
156	male	human	pedestrian (larger group/road)	pedestrian	21	1 to 5 years	undergraduate studies	very positive	uncorrected vision	100	sidewalk_vs_road	smaller_groups	endanger_sidewalk
156	male	human	pedestrian (larger group/road)	pedestrian	21	1 to 5 years	undergraduate studies	very positive	uncorrected vision	71	sidewalk_vs_road	larger_groups	endanger_sidewalk
037	female	self-driving	pedestrian (smaller group/sidewalk)	pedestrian	19	1 to 5 years	no higher education	negative	uncorrected vision	50	sidewalk_vs_road	larger_groups	endanger_sidewalk
037	female	self-driving	pedestrian (smaller group/sidewalk)	pedestrian	19	1 to 5 years	no higher education	negative	uncorrected vision	64	sidewalk_vs_road	smaller_groups	endanger_sidewalk
056	female	human	observer	observer	19	1 to 5 years	no higher education	neutral	no impairment	72	sidewalk_vs_road	smaller_groups	endanger_sidewalk
056	female	human	observer	observer	19	1 to 5 years	no higher education	neutral	no impairment	79	sidewalk_vs_road	larger_groups	endanger_sidewalk
054	male	self-driving	pedestrian (larger group/road)	observer	18	1 to 5 years	no higher education	very positive	corrected vision	34	sidewalk_vs_road	larger_groups	endanger_sidewalk
054	male	self-driving	pedestrian (larger group/road)	observer	18	1 to 5 years	no higher education	very positive	corrected vision	90	sidewalk_vs_road	smaller_groups	endanger_road
135	female	self-driving	pedestrian (smaller group/sidewalk)	observer	20	none	no higher education	positive	no impairment	66	sidewalk_vs_road	smaller_groups	endanger_sidewalk
135	female	self-driving	pedestrian (smaller group/sidewalk)	observer	20	none	no higher education	positive	no impairment	74	sidewalk_vs_road	larger_groups	endanger_sidewalk
120	male	self-driving	pedestrian (larger group/road)	observer	19	1 to 5 years	no higher education	positive	corrected vision	28	sidewalk_vs_road	larger_groups	endanger_road
120	male	self-driving	pedestrian (larger group/road)	observer	19	1 to 5 years	no higher education	positive	corrected vision	26	sidewalk_vs_road	smaller_groups	endanger_road
101	male	human	pedestrian (larger group/road)	pedestrian	24	5 to 10 years	undergraduate studies	neutral	corrected vision	69	sidewalk_vs_road	larger_groups	endanger_sidewalk
101	male	human	pedestrian (larger group/road)	pedestrian	24	5 to 10 years	undergraduate studies	neutral	corrected vision	69	sidewalk_vs_road	smaller_groups	endanger_sidewalk
160	female	self-driving	observer	observer	24	5 to 10 years	undergraduate studies	neutral	no impairment	61	sidewalk_vs_road	larger_groups	endanger_sidewalk
160	female	self-driving	observer	observer	24	5 to 10 years	undergraduate studies	neutral	no impairment	67	sidewalk_vs_road	smaller_groups	endanger_sidewalk
165	male	self-driving	pedestrian (smaller group/sidewalk)	pedestrian	22	1 to 5 years	no higher education	neutral	no impairment	100	sidewalk_vs_road	smaller_groups	endanger_sidewalk
165	male	self-driving	pedestrian (smaller group/sidewalk)	pedestrian	22	1 to 5 years	no higher education	neutral	no impairment	92	sidewalk_vs_road	larger_groups	endanger_road
051	female	self-driving	pedestrian (larger group/road)	pedestrian	24	1 to 5 years	undergraduate studies	neutral	corrected vision	38	sidewalk_vs_road	smaller_groups	endanger_road
051	female	self-driving	pedestrian (larger group/road)	pedestrian	24	1 to 5 years	undergraduate studies	neutral	corrected vision	58	sidewalk_vs_road	larger_groups	endanger_sidewalk
122	female	human	observer	observer	20	none	no higher education	positive	uncorrected vision	16	sidewalk_vs_road	larger_groups	endanger_sidewalk
122	female	human	observer	observer	20	none	no higher education	positive	uncorrected vision	16	sidewalk_vs_road	smaller_groups	endanger_sidewalk
174	male	human	pedestrian (larger group/road)	pedestrian	25	5 to 10 years	no higher education	very positive	corrected vision	100	sidewalk_vs_road	larger_groups	endanger_sidewalk
174	male	human	pedestrian (larger group/road)	pedestrian	25	5 to 10 years	no higher education	very positive	corrected vision	100	sidewalk_vs_road	smaller_groups	endanger_sidewalk
139	female	self-driving	pedestrian (larger group/road)	observer	25	5 to 10 years	no higher education	negative	no impairment	59	sidewalk_vs_road	larger_groups	endanger_sidewalk
139	female	self-driving	pedestrian (larger group/road)	observer	25	5 to 10 years	no higher education	negative	no impairment	65	sidewalk_vs_road	smaller_groups	endanger_sidewalk
061	male	human	passenger	passenger	28	1 to 5 years	no higher education	positive	no impairment	70	sidewalk_vs_road	smaller_groups	endanger_road
061	male	human	passenger	passenger	28	1 to 5 years	no higher education	positive	no impairment	32	sidewalk_vs_road	larger_groups	endanger_road
046	female	human	pedestrian (smaller group/sidewalk)	observer	18	1 to 5 years	no higher education	very negative	uncorrected vision	100	sidewalk_vs_road	larger_groups	endanger_sidewalk
046	female	human	pedestrian (smaller group/sidewalk)	observer	18	1 to 5 years	no higher education	very negative	uncorrected vision	100	sidewalk_vs_road	smaller_groups	endanger_sidewalk
026	female	human	passenger	passenger	21	none	no higher education	neutral	no impairment	100	sidewalk_vs_road	larger_groups	endanger_sidewalk
026	female	human	passenger	passenger	21	none	no higher education	neutral	no impairment	87	sidewalk_vs_road	smaller_groups	endanger_sidewalk
016	male	self-driving	pedestrian (larger group/road)	observer	21	1 to 5 years	no higher education	positive	no impairment	84	sidewalk_vs_road	smaller_groups	endanger_sidewalk
016	male	self-driving	pedestrian (larger group/road)	observer	21	1 to 5 years	no higher education	positive	no impairment	73	sidewalk_vs_road	larger_groups	endanger_sidewalk
125	male	human	pedestrian (smaller group/sidewalk)	pedestrian	20	1 to 5 years	no higher education	very positive	no impairment	100	sidewalk_vs_road	larger_groups	endanger_sidewalk
125	male	human	pedestrian (smaller group/sidewalk)	pedestrian	20	1 to 5 years	no higher education	very positive	no impairment	100	sidewalk_vs_road	smaller_groups	endanger_sidewalk
148	male	self-driving	passenger	passenger	25	5 to 10 years	undergraduate studies	neutral	uncorrected vision	74	sidewalk_vs_road	larger_groups	endanger_sidewalk
148	male	self-driving	passenger	passenger	25	5 to 10 years	undergraduate studies	neutral	uncorrected vision	50	sidewalk_vs_road	smaller_groups	endanger_sidewalk
053	female	human	pedestrian (smaller group/sidewalk)	observer	22	1 to 5 years	undergraduate studies	neutral	no impairment	29	sidewalk_vs_road	smaller_groups	endanger_road
053	female	human	pedestrian (smaller group/sidewalk)	observer	22	1 to 5 years	undergraduate studies	neutral	no impairment	70	sidewalk_vs_road	larger_groups	endanger_sidewalk
055	female	human	passenger	passenger	20	none	no higher education	neutral	no impairment	28	sidewalk_vs_road	smaller_groups	endanger_sidewalk
055	female	human	passenger	passenger	20	none	no higher education	neutral	no impairment	32	sidewalk_vs_road	larger_groups	endanger_sidewalk
109	female	human	observer	observer	26	5 to 10 years	no higher education	neutral	no impairment	100	sidewalk_vs_road	larger_groups	endanger_sidewalk
109	female	human	observer	observer	26	5 to 10 years	no higher education	neutral	no impairment	100	sidewalk_vs_road	smaller_groups	endanger_sidewalk
104	male	human	passenger	observer	25	5 to 10 years	undergraduate studies	positive	corrected vision	79	sidewalk_vs_road	larger_groups	endanger_sidewalk
104	male	human	passenger	observer	25	5 to 10 years	undergraduate studies	positive	corrected vision	61	sidewalk_vs_road	smaller_groups	endanger_sidewalk
095	male	self-driving	observer	observer	21	1 to 5 years	no higher education	negative	no impairment	41	sidewalk_vs_road	smaller_groups	endanger_road
095	male	self-driving	observer	observer	21	1 to 5 years	no higher education	negative	no impairment	36	sidewalk_vs_road	larger_groups	endanger_sidewalk
117	male	human	passenger	observer	22	1 to 5 years	no higher education	neutral	corrected vision	100	sidewalk_vs_road	larger_groups	endanger_sidewalk
117	male	human	passenger	observer	22	1 to 5 years	no higher education	neutral	corrected vision	100	sidewalk_vs_road	smaller_groups	endanger_sidewalk
161	female	human	passenger	passenger	20	1 to 5 years	no higher education	positive	no impairment	72	sidewalk_vs_road	larger_groups	endanger_road
161	female	human	passenger	passenger	20	1 to 5 years	no higher education	positive	no impairment	0	sidewalk_vs_road	smaller_groups	endanger_sidewalk
060	female	self-driving	observer	observer	25	5 to 10 years	no higher education	neutral	no impairment	50	sidewalk_vs_road	larger_groups	endanger_sidewalk
060	female	self-driving	observer	observer	25	5 to 10 years	no higher education	neutral	no impairment	74	sidewalk_vs_road	smaller_groups	endanger_road
068	male	human	pedestrian (larger group/road)	pedestrian	24	5 to 10 years	undergraduate studies	very positive	corrected vision	29	sidewalk_vs_road	smaller_groups	endanger_sidewalk
068	male	human	pedestrian (larger group/road)	pedestrian	24	5 to 10 years	undergraduate studies	very positive	corrected vision	27	sidewalk_vs_road	larger_groups	endanger_road
137	male	self-driving	observer	observer	31	more than 10 years	undergraduate studies	positive	corrected vision	0	sidewalk_vs_road	smaller_groups	endanger_road
137	male	self-driving	observer	observer	31	more than 10 years	undergraduate studies	positive	corrected vision	0	sidewalk_vs_road	larger_groups	endanger_road
115	male	human	observer	passenger	27	5 to 10 years	graduate studies	very positive	corrected vision	65	sidewalk_vs_road	smaller_groups	endanger_sidewalk
115	male	human	observer	passenger	27	5 to 10 years	graduate studies	very positive	corrected vision	95	sidewalk_vs_road	larger_groups	endanger_sidewalk
043	female	human	pedestrian (smaller group/sidewalk)	pedestrian	20	none	no higher education	neutral	no impairment	100	sidewalk_vs_road	smaller_groups	endanger_sidewalk
043	female	human	pedestrian (smaller group/sidewalk)	pedestrian	20	none	no higher education	neutral	no impairment	68	sidewalk_vs_road	larger_groups	endanger_sidewalk
039	female	self-driving	pedestrian (smaller group/sidewalk)	pedestrian	24	5 to 10 years	no higher education	negative	no impairment	68	sidewalk_vs_road	smaller_groups	endanger_sidewalk
039	female	self-driving	pedestrian (smaller group/sidewalk)	pedestrian	24	5 to 10 years	no higher education	negative	no impairment	60	sidewalk_vs_road	larger_groups	endanger_sidewalk
084	female	human	passenger	passenger	25	5 to 10 years	no higher education	negative	corrected vision	60	sidewalk_vs_road	larger_groups	endanger_sidewalk
084	female	human	passenger	passenger	25	5 to 10 years	no higher education	negative	corrected vision	66	sidewalk_vs_road	smaller_groups	endanger_sidewalk
106	female	human	observer	passenger	23	5 to 10 years	undergraduate studies	neutral	no impairment	72	sidewalk_vs_road	smaller_groups	endanger_road
106	female	human	observer	passenger	23	5 to 10 years	undergraduate studies	neutral	no impairment	0	sidewalk_vs_road	larger_groups	endanger_sidewalk
048	female	self-driving	observer	passenger	25	none	graduate studies	neutral	corrected vision	76	sidewalk_vs_road	smaller_groups	endanger_road
048	female	self-driving	observer	passenger	25	none	graduate studies	neutral	corrected vision	70	sidewalk_vs_road	larger_groups	endanger_road
146	male	human	pedestrian (larger group/road)	observer	20	1 to 5 years	no higher education	positive	corrected vision	50	sidewalk_vs_road	smaller_groups	endanger_sidewalk
146	male	human	pedestrian (larger group/road)	observer	20	1 to 5 years	no higher education	positive	corrected vision	50	sidewalk_vs_road	larger_groups	endanger_sidewalk
045	male	human	pedestrian (smaller group/sidewalk)	pedestrian	23	1 to 5 years	no higher education	positive	no impairment	69	sidewalk_vs_road	larger_groups	endanger_sidewalk
045	male	human	pedestrian (smaller group/sidewalk)	pedestrian	23	1 to 5 years	no higher education	positive	no impairment	71	sidewalk_vs_road	smaller_groups	endanger_sidewalk
133	female	human	pedestrian (smaller group/sidewalk)	pedestrian	21	1 to 5 years	no higher education	very negative	corrected vision	100	sidewalk_vs_road	smaller_groups	endanger_sidewalk
133	female	human	pedestrian (smaller group/sidewalk)	pedestrian	21	1 to 5 years	no higher education	very negative	corrected vision	100	sidewalk_vs_road	larger_groups	endanger_sidewalk
087	female	self-driving	pedestrian (smaller group/sidewalk)	pedestrian	23	1 to 5 years	no higher education	very positive	no impairment	17	sidewalk_vs_road	smaller_groups	endanger_sidewalk
087	female	self-driving	pedestrian (smaller group/sidewalk)	pedestrian	23	1 to 5 years	no higher education	very positive	no impairment	99	sidewalk_vs_road	larger_groups	endanger_sidewalk
175	male	self-driving	passenger	passenger	21	1 to 5 years	no higher education	positive	no impairment	89	sidewalk_vs_road	larger_groups	endanger_sidewalk
175	male	self-driving	passenger	passenger	21	1 to 5 years	no higher education	positive	no impairment	68	sidewalk_vs_road	smaller_groups	endanger_sidewalk
081	female	human	observer	observer	21	1 to 5 years	no higher education	positive	no impairment	66	sidewalk_vs_road	smaller_groups	endanger_sidewalk
081	female	human	observer	observer	21	1 to 5 years	no higher education	positive	no impairment	69	sidewalk_vs_road	larger_groups	endanger_sidewalk
094	female	self-driving	pedestrian (larger group/road)	pedestrian	30	none	undergraduate studies	negative	corrected vision	4	sidewalk_vs_road	smaller_groups	endanger_road
094	female	self-driving	pedestrian (larger group/road)	pedestrian	30	none	undergraduate studies	negative	corrected vision	67	sidewalk_vs_road	larger_groups	endanger_sidewalk
177	female	human	observer	observer	40	more than 10 years	graduate studies	neutral	no impairment	50	sidewalk_vs_road	larger_groups	endanger_sidewalk
177	female	human	observer	observer	40	more than 10 years	graduate studies	neutral	no impairment	45	sidewalk_vs_road	smaller_groups	endanger_road
098	female	self-driving	observer	observer	25	5 to 10 years	graduate studies	neutral	no impairment	74	sidewalk_vs_road	smaller_groups	endanger_sidewalk
098	female	self-driving	observer	observer	25	5 to 10 years	graduate studies	neutral	no impairment	23	sidewalk_vs_road	larger_groups	endanger_sidewalk
071	female	human	observer	observer	20	none	no higher education	neutral	no impairment	75	sidewalk_vs_road	larger_groups	endanger_sidewalk
071	female	human	observer	observer	20	none	no higher education	neutral	no impairment	69	sidewalk_vs_road	smaller_groups	endanger_sidewalk
131	male	human	passenger	passenger	32	more than 10 years	undergraduate studies	very negative	no impairment	100	sidewalk_vs_road	smaller_groups	endanger_road
131	male	human	passenger	passenger	32	more than 10 years	undergraduate studies	very negative	no impairment	67	sidewalk_vs_road	larger_groups	endanger_sidewalk
017	female	self-driving	observer	observer	18	none	no higher education	negative	corrected vision	100	sidewalk_vs_road	smaller_groups	endanger_sidewalk
017	female	self-driving	observer	observer	18	none	no higher education	negative	corrected vision	85	sidewalk_vs_road	larger_groups	endanger_sidewalk
035	male	self-driving	passenger	observer	20	1 to 5 years	no higher education	very positive	corrected vision	72	sidewalk_vs_road	larger_groups	endanger_sidewalk
035	male	self-driving	passenger	observer	20	1 to 5 years	no higher education	very positive	corrected vision	75	sidewalk_vs_road	smaller_groups	endanger_sidewalk
044	male	self-driving	observer	observer	25	5 to 10 years	no higher education	very positive	no impairment	100	sidewalk_vs_road	smaller_groups	endanger_sidewalk
044	male	self-driving	observer	observer	25	5 to 10 years	no higher education	very positive	no impairment	8	sidewalk_vs_road	larger_groups	endanger_road
023	female	human	pedestrian (larger group/road)	observer	22	none	no higher education	very negative	corrected vision	0	sidewalk_vs_road	smaller_groups	endanger_road
023	female	human	pedestrian (larger group/road)	observer	22	none	no higher education	very negative	corrected vision	0	sidewalk_vs_road	larger_groups	endanger_sidewalk
176	male	self-driving	pedestrian (larger group/road)	pedestrian	30	more than 10 years	no higher education	positive	corrected vision	91	sidewalk_vs_road	smaller_groups	endanger_sidewalk
176	male	self-driving	pedestrian (larger group/road)	pedestrian	30	more than 10 years	no higher education	positive	corrected vision	100	sidewalk_vs_road	larger_groups	endanger_sidewalk
108	male	human	pedestrian (larger group/road)	pedestrian	23	1 to 5 years	no higher education	positive	no impairment	45	sidewalk_vs_road	smaller_groups	endanger_sidewalk
108	male	human	pedestrian (larger group/road)	pedestrian	23	1 to 5 years	no higher education	positive	no impairment	69	sidewalk_vs_road	larger_groups	endanger_sidewalk
021	female	human	passenger	observer	21	1 to 5 years	no higher education	neutral	uncorrected vision	76	sidewalk_vs_road	smaller_groups	endanger_sidewalk
021	female	human	passenger	observer	21	1 to 5 years	no higher education	neutral	uncorrected vision	79	sidewalk_vs_road	larger_groups	endanger_sidewalk
014	female	self-driving	passenger	observer	24	5 to 10 years	no higher education	negative	corrected vision	31	sidewalk_vs_road	smaller_groups	endanger_road
014	female	self-driving	passenger	observer	24	5 to 10 years	no higher education	negative	corrected vision	70	sidewalk_vs_road	larger_groups	endanger_sidewalk
052	male	self-driving	pedestrian (smaller group/sidewalk)	pedestrian	27	5 to 10 years	no higher education	negative	no impairment	24	sidewalk_vs_road	smaller_groups	endanger_sidewalk
052	male	self-driving	pedestrian (smaller group/sidewalk)	pedestrian	27	5 to 10 years	no higher education	negative	no impairment	93	sidewalk_vs_road	larger_groups	endanger_sidewalk
107	female	human	observer	pedestrian	23	1 to 5 years	no higher education	very negative	no impairment	100	sidewalk_vs_road	larger_groups	endanger_sidewalk
107	female	human	observer	pedestrian	23	1 to 5 years	no higher education	very negative	no impairment	96	sidewalk_vs_road	smaller_groups	endanger_sidewalk
004	male	self-driving	pedestrian (larger group/road)	pedestrian	30	5 to 10 years	graduate studies	very positive	corrected vision	100	sidewalk_vs_road	larger_groups	endanger_sidewalk
004	male	self-driving	pedestrian (larger group/road)	pedestrian	30	5 to 10 years	graduate studies	very positive	corrected vision	100	sidewalk_vs_road	smaller_groups	endanger_sidewalk
163	male	human	observer	observer	29	none	no higher education	very positive	no impairment	74	sidewalk_vs_road	larger_groups	endanger_sidewalk
163	male	human	observer	observer	29	none	no higher education	very positive	no impairment	89	sidewalk_vs_road	smaller_groups	endanger_sidewalk
027	male	human	observer	observer	25	5 to 10 years	no higher education	neutral	corrected vision	100	sidewalk_vs_road	larger_groups	endanger_road
027	male	human	observer	observer	25	5 to 10 years	no higher education	neutral	corrected vision	100	sidewalk_vs_road	smaller_groups	endanger_sidewalk
159	female	self-driving	pedestrian (smaller group/sidewalk)	pedestrian	19	1 to 5 years	no higher education	negative	corrected vision	76	sidewalk_vs_road	smaller_groups	endanger_sidewalk
159	female	self-driving	pedestrian (smaller group/sidewalk)	pedestrian	19	1 to 5 years	no higher education	negative	corrected vision	38	sidewalk_vs_road	larger_groups	endanger_sidewalk
103	female	human	observer	observer	25	5 to 10 years	no higher education	neutral	no impairment	69	sidewalk_vs_road	smaller_groups	endanger_sidewalk
103	female	human	observer	observer	25	5 to 10 years	no higher education	neutral	no impairment	71	sidewalk_vs_road	larger_groups	endanger_sidewalk
127	male	human	pedestrian (smaller group/sidewalk)	pedestrian	27	1 to 5 years	no higher education	positive	corrected vision	100	sidewalk_vs_road	smaller_groups	endanger_sidewalk
127	male	human	pedestrian (smaller group/sidewalk)	pedestrian	27	1 to 5 years	no higher education	positive	corrected vision	100	sidewalk_vs_road	larger_groups	endanger_sidewalk
038	male	self-driving	pedestrian (larger group/road)	pedestrian	21	none	no higher education	neutral	corrected vision	100	sidewalk_vs_road	smaller_groups	endanger_sidewalk
038	male	self-driving	pedestrian (larger group/road)	pedestrian	21	none	no higher education	neutral	corrected vision	100	sidewalk_vs_road	larger_groups	endanger_sidewalk
064	male	human	pedestrian (smaller group/sidewalk)	pedestrian	24	1 to 5 years	no higher education	very positive	no impairment	100	sidewalk_vs_road	larger_groups	endanger_road
064	male	human	pedestrian (smaller group/sidewalk)	pedestrian	24	1 to 5 years	no higher education	very positive	no impairment	100	sidewalk_vs_road	smaller_groups	endanger_road
182	male	self-driving	observer	passenger	20	1 to 5 years	no higher education	negative	no impairment	38	sidewalk_vs_road	smaller_groups	endanger_road
182	male	self-driving	observer	passenger	20	1 to 5 years	no higher education	negative	no impairment	0	sidewalk_vs_road	larger_groups	endanger_road
074	female	human	pedestrian (larger group/road)	observer	20	1 to 5 years	no higher education	neutral	no impairment	19	sidewalk_vs_road	larger_groups	endanger_road
074	female	human	pedestrian (larger group/road)	observer	20	1 to 5 years	no higher education	neutral	no impairment	38	sidewalk_vs_road	smaller_groups	endanger_road
153	male	human	passenger	passenger	21	1 to 5 years	no higher education	very positive	uncorrected vision	62	sidewalk_vs_road	larger_groups	endanger_sidewalk
153	male	human	passenger	passenger	21	1 to 5 years	no higher education	very positive	uncorrected vision	100	sidewalk_vs_road	smaller_groups	endanger_sidewalk
013	male	self-driving	pedestrian (larger group/road)	pedestrian	47	more than 10 years	graduate studies	negative	corrected vision	100	sidewalk_vs_road	larger_groups	endanger_sidewalk
013	male	self-driving	pedestrian (larger group/road)	pedestrian	47	more than 10 years	graduate studies	negative	corrected vision	100	sidewalk_vs_road	smaller_groups	endanger_sidewalk
040	male	self-driving	observer	observer	20	1 to 5 years	no higher education	very positive	corrected vision	91	sidewalk_vs_road	larger_groups	endanger_sidewalk
040	male	self-driving	observer	observer	20	1 to 5 years	no higher education	very positive	corrected vision	93	sidewalk_vs_road	smaller_groups	endanger_sidewalk
150	male	human	pedestrian (smaller group/sidewalk)	pedestrian	20	1 to 5 years	no higher education	very positive	corrected vision	74	sidewalk_vs_road	smaller_groups	endanger_road
150	male	human	pedestrian (smaller group/sidewalk)	pedestrian	20	1 to 5 years	no higher education	very positive	corrected vision	81	sidewalk_vs_road	larger_groups	endanger_road
078	male	human	observer	passenger	23	5 to 10 years	no higher education	negative	corrected vision	65	sidewalk_vs_road	smaller_groups	endanger_sidewalk
078	male	human	observer	passenger	23	5 to 10 years	no higher education	negative	corrected vision	100	sidewalk_vs_road	larger_groups	endanger_sidewalk
086	female	self-driving	passenger	passenger	23	1 to 5 years	no higher education	neutral	no impairment	68	sidewalk_vs_road	smaller_groups	endanger_road
086	female	self-driving	passenger	passenger	23	1 to 5 years	no higher education	neutral	no impairment	10	sidewalk_vs_road	larger_groups	endanger_road
003	male	self-driving	pedestrian (smaller group/sidewalk)	observer	30	more than 10 years	no higher education	negative	corrected vision	100	sidewalk_vs_road	smaller_groups	endanger_road
003	male	self-driving	pedestrian (smaller group/sidewalk)	observer	30	more than 10 years	no higher education	negative	corrected vision	100	sidewalk_vs_road	larger_groups	endanger_road
158	female	self-driving	passenger	passenger	19	1 to 5 years	no higher education	neutral	no impairment	15	sidewalk_vs_road	smaller_groups	endanger_sidewalk
158	female	self-driving	passenger	passenger	19	1 to 5 years	no higher education	neutral	no impairment	12	sidewalk_vs_road	larger_groups	endanger_sidewalk
047	male	self-driving	pedestrian (smaller group/sidewalk)	observer	24	5 to 10 years	no higher education	positive	no impairment	39	sidewalk_vs_road	larger_groups	endanger_road
047	male	self-driving	pedestrian (smaller group/sidewalk)	observer	24	5 to 10 years	no higher education	positive	no impairment	23	sidewalk_vs_road	smaller_groups	endanger_road
155	female	human	pedestrian (larger group/road)	pedestrian	30	none	no higher education	neutral	corrected vision	50	sidewalk_vs_road	larger_groups	endanger_sidewalk
155	female	human	pedestrian (larger group/road)	pedestrian	30	none	no higher education	neutral	corrected vision	50	sidewalk_vs_road	smaller_groups	endanger_sidewalk
154	female	human	pedestrian (smaller group/sidewalk)	pedestrian	19	1 to 5 years	no higher education	negative	no impairment	21	sidewalk_vs_road	smaller_groups	endanger_sidewalk
154	female	human	pedestrian (smaller group/sidewalk)	pedestrian	19	1 to 5 years	no higher education	negative	no impairment	35	sidewalk_vs_road	larger_groups	endanger_sidewalk
092	male	human	pedestrian (larger group/road)	pedestrian	20	1 to 5 years	no higher education	positive	no impairment	68	sidewalk_vs_road	smaller_groups	endanger_sidewalk
092	male	human	pedestrian (larger group/road)	pedestrian	20	1 to 5 years	no higher education	positive	no impairment	39	sidewalk_vs_road	larger_groups	endanger_sidewalk
119	male	human	pedestrian (smaller group/sidewalk)	observer	19	1 to 5 years	no higher education	neutral	no impairment	100	sidewalk_vs_road	larger_groups	endanger_sidewalk
119	male	human	pedestrian (smaller group/sidewalk)	observer	19	1 to 5 years	no higher education	neutral	no impairment	100	sidewalk_vs_road	smaller_groups	endanger_sidewalk
143	female	self-driving	pedestrian (larger group/road)	passenger	21	1 to 5 years	no higher education	neutral	corrected vision	50	sidewalk_vs_road	smaller_groups	endanger_sidewalk
143	female	self-driving	pedestrian (larger group/road)	passenger	21	1 to 5 years	no higher education	neutral	corrected vision	39	sidewalk_vs_road	larger_groups	endanger_road
167	male	human	pedestrian (larger group/road)	pedestrian	25	5 to 10 years	undergraduate studies	positive	no impairment	85	sidewalk_vs_road	smaller_groups	endanger_sidewalk
167	male	human	pedestrian (larger group/road)	pedestrian	25	5 to 10 years	undergraduate studies	positive	no impairment	0	sidewalk_vs_road	larger_groups	endanger_road
136	female	human	passenger	observer	19	none	no higher education	neutral	uncorrected vision	19	sidewalk_vs_road	smaller_groups	endanger_road
136	female	human	passenger	observer	19	none	no higher education	neutral	uncorrected vision	24	sidewalk_vs_road	larger_groups	endanger_sidewalk
141	male	human	pedestrian (larger group/road)	observer	22	5 to 10 years	no higher education	very negative	no impairment	66	sidewalk_vs_road	larger_groups	endanger_sidewalk
141	male	human	pedestrian (larger group/road)	observer	22	5 to 10 years	no higher education	very negative	no impairment	69	sidewalk_vs_road	smaller_groups	endanger_sidewalk
033	female	human	pedestrian (larger group/road)	observer	19	1 to 5 years	no higher education	very positive	uncorrected vision	40	sidewalk_vs_road	larger_groups	endanger_sidewalk
033	female	human	pedestrian (larger group/road)	observer	19	1 to 5 years	no higher education	very positive	uncorrected vision	13	sidewalk_vs_road	smaller_groups	endanger_sidewalk
088	female	self-driving	pedestrian (larger group/road)	pedestrian	19	1 to 5 years	no higher education	negative	no impairment	20	sidewalk_vs_road	smaller_groups	endanger_sidewalk
088	female	self-driving	pedestrian (larger group/road)	pedestrian	19	1 to 5 years	no higher education	negative	no impairment	7	sidewalk_vs_road	larger_groups	endanger_sidewalk
114	female	self-driving	pedestrian (smaller group/sidewalk)	pedestrian	19	1 to 5 years	no higher education	neutral	corrected vision	48	sidewalk_vs_road	smaller_groups	endanger_road
114	female	self-driving	pedestrian (smaller group/sidewalk)	pedestrian	19	1 to 5 years	no higher education	neutral	corrected vision	27	sidewalk_vs_road	larger_groups	endanger_sidewalk
005	female	self-driving	pedestrian (smaller group/sidewalk)	pedestrian	21	1 to 5 years	no higher education	neutral	no impairment	0	sidewalk_vs_road	smaller_groups	endanger_sidewalk
005	female	self-driving	pedestrian (smaller group/sidewalk)	pedestrian	21	1 to 5 years	no higher education	neutral	no impairment	8	sidewalk_vs_road	larger_groups	endanger_sidewalk
002	male	self-driving	passenger	passenger	27	5 to 10 years	undergraduate studies	positive	no impairment	100	sidewalk_vs_road	larger_groups	endanger_sidewalk
002	male	self-driving	passenger	passenger	27	5 to 10 years	undergraduate studies	positive	no impairment	100	sidewalk_vs_road	smaller_groups	endanger_sidewalk
164	male	human	pedestrian (smaller group/sidewalk)	pedestrian	26	5 to 10 years	no higher education	very positive	no impairment	100	sidewalk_vs_road	larger_groups	endanger_road
164	male	human	pedestrian (smaller group/sidewalk)	pedestrian	26	5 to 10 years	no higher education	very positive	no impairment	100	sidewalk_vs_road	smaller_groups	endanger_road
065	male	human	pedestrian (smaller group/sidewalk)	observer	23	none	no higher education	very positive	no impairment	90	sidewalk_vs_road	larger_groups	endanger_road
065	male	human	pedestrian (smaller group/sidewalk)	observer	23	none	no higher education	very positive	no impairment	91	sidewalk_vs_road	smaller_groups	endanger_road
112	male	self-driving	passenger	pedestrian	20	1 to 5 years	no higher education	very positive	no impairment	13	sidewalk_vs_road	smaller_groups	endanger_sidewalk
112	male	self-driving	passenger	pedestrian	20	1 to 5 years	no higher education	very positive	no impairment	22	sidewalk_vs_road	larger_groups	endanger_sidewalk
180	female	human	pedestrian (larger group/road)	observer	18	1 to 5 years	no higher education	negative	corrected vision	98	sidewalk_vs_road	smaller_groups	endanger_sidewalk
180	female	human	pedestrian (larger group/road)	observer	18	1 to 5 years	no higher education	negative	corrected vision	83	sidewalk_vs_road	larger_groups	endanger_sidewalk
166	female	human	pedestrian (smaller group/sidewalk)	passenger	19	1 to 5 years	no higher education	neutral	corrected vision	55	sidewalk_vs_road	smaller_groups	endanger_sidewalk
166	female	human	pedestrian (smaller group/sidewalk)	passenger	19	1 to 5 years	no higher education	neutral	corrected vision	58	sidewalk_vs_road	larger_groups	endanger_sidewalk
099	female	self-driving	pedestrian (smaller group/sidewalk)	pedestrian	20	1 to 5 years	no higher education	positive	no impairment	67	sidewalk_vs_road	smaller_groups	endanger_sidewalk
099	female	self-driving	pedestrian (smaller group/sidewalk)	pedestrian	20	1 to 5 years	no higher education	positive	no impairment	67	sidewalk_vs_road	larger_groups	endanger_sidewalk
113	male	self-driving	pedestrian (larger group/road)	pedestrian	24	5 to 10 years	no higher education	very positive	no impairment	100	sidewalk_vs_road	smaller_groups	endanger_road
113	male	self-driving	pedestrian (larger group/road)	pedestrian	24	5 to 10 years	no higher education	very positive	no impairment	100	sidewalk_vs_road	larger_groups	endanger_road
049	female	self-driving	pedestrian (larger group/road)	pedestrian	20	1 to 5 years	no higher education	positive	no impairment	100	sidewalk_vs_road	larger_groups	endanger_sidewalk
049	female	self-driving	pedestrian (larger group/road)	pedestrian	20	1 to 5 years	no higher education	positive	no impairment	100	sidewalk_vs_road	smaller_groups	endanger_sidewalk
083	male	self-driving	pedestrian (smaller group/sidewalk)	pedestrian	22	none	no higher education	very positive	no impairment	35	sidewalk_vs_road	smaller_groups	endanger_road
083	male	self-driving	pedestrian (smaller group/sidewalk)	pedestrian	22	none	no higher education	very positive	no impairment	83	sidewalk_vs_road	larger_groups	endanger_road
121	male	human	passenger	passenger	19	1 to 5 years	no higher education	positive	no impairment	79	sidewalk_vs_road	smaller_groups	endanger_sidewalk
121	male	human	passenger	passenger	19	1 to 5 years	no higher education	positive	no impairment	62	sidewalk_vs_road	larger_groups	endanger_sidewalk
147	female	human	pedestrian (larger group/road)	pedestrian	18	1 to 5 years	no higher education	negative	corrected vision	65	sidewalk_vs_road	larger_groups	endanger_road
147	female	human	pedestrian (larger group/road)	pedestrian	18	1 to 5 years	no higher education	negative	corrected vision	85	sidewalk_vs_road	smaller_groups	endanger_road
111	female	self-driving	pedestrian (larger group/road)	pedestrian	23	5 to 10 years	no higher education	neutral	uncorrected vision	71	sidewalk_vs_road	smaller_groups	endanger_sidewalk
111	female	self-driving	pedestrian (larger group/road)	pedestrian	23	5 to 10 years	no higher education	neutral	uncorrected vision	75	sidewalk_vs_road	larger_groups	endanger_sidewalk
008	female	human	pedestrian (larger group/road)	pedestrian	24	5 to 10 years	undergraduate studies	neutral	no impairment	38	sidewalk_vs_road	larger_groups	endanger_sidewalk
008	female	human	pedestrian (larger group/road)	pedestrian	24	5 to 10 years	undergraduate studies	neutral	no impairment	77	sidewalk_vs_road	smaller_groups	endanger_sidewalk
015	male	human	passenger	observer	26	5 to 10 years	no higher education	very positive	no impairment	100	sidewalk_vs_road	larger_groups	endanger_sidewalk
015	male	human	passenger	observer	26	5 to 10 years	no higher education	very positive	no impairment	63	sidewalk_vs_road	smaller_groups	endanger_sidewalk
079	female	self-driving	observer	observer	25	5 to 10 years	no higher education	positive	corrected vision	46	sidewalk_vs_road	smaller_groups	endanger_sidewalk
079	female	self-driving	observer	observer	25	5 to 10 years	no higher education	positive	corrected vision	20	sidewalk_vs_road	larger_groups	endanger_sidewalk
041	male	self-driving	pedestrian (smaller group/sidewalk)	pedestrian	22	1 to 5 years	no higher education	very positive	no impairment	100	sidewalk_vs_road	smaller_groups	endanger_road
041	male	self-driving	pedestrian (smaller group/sidewalk)	pedestrian	22	1 to 5 years	no higher education	very positive	no impairment	48	sidewalk_vs_road	larger_groups	endanger_road
057	male	human	observer	observer	21	1 to 5 years	no higher education	very positive	no impairment	50	sidewalk_vs_road	larger_groups	endanger_sidewalk
057	male	human	observer	observer	21	1 to 5 years	no higher education	very positive	no impairment	63	sidewalk_vs_road	smaller_groups	endanger_sidewalk
171	male	human	pedestrian (smaller group/sidewalk)	pedestrian	19	1 to 5 years	no higher education	positive	no impairment	38	sidewalk_vs_road	smaller_groups	endanger_sidewalk
171	male	human	pedestrian (smaller group/sidewalk)	pedestrian	19	1 to 5 years	no higher education	positive	no impairment	65	sidewalk_vs_road	larger_groups	endanger_sidewalk
029	male	self-driving	pedestrian	observer	21	1 to 5 years	no higher education	positive	no impairment	100	car_occupants_vs_pedestrians	parked_van	endanger_pedestrians
029	male	self-driving	pedestrian	observer	21	1 to 5 years	no higher education	positive	no impairment	83	car_occupants_vs_pedestrians	cliff	endanger_pedestrians
059	male	self-driving	passenger	passenger	19	none	no higher education	very positive	corrected vision	82	car_occupants_vs_pedestrians	cliff	endanger_pedestrians
059	male	self-driving	passenger	passenger	19	none	no higher education	very positive	corrected vision	0	car_occupants_vs_pedestrians	parked_van	endanger_occupants
010	female	human	passenger	observer	21	1 to 5 years	no higher education	very positive	no impairment	33	car_occupants_vs_pedestrians	cliff	endanger_pedestrians
010	female	human	passenger	observer	21	1 to 5 years	no higher education	very positive	no impairment	100	car_occupants_vs_pedestrians	parked_van	endanger_occupants
022	female	self-driving	passenger	passenger	24	5 to 10 years	no higher education	positive	no impairment	38	car_occupants_vs_pedestrians	parked_van	endanger_occupants
022	female	self-driving	passenger	passenger	24	5 to 10 years	no higher education	positive	no impairment	22	car_occupants_vs_pedestrians	cliff	endanger_pedestrians
001	female	self-driving	pedestrian	observer	24	5 to 10 years	undergraduate studies	negative	no impairment	27	car_occupants_vs_pedestrians	cliff	endanger_occupants
001	female	self-driving	pedestrian	observer	24	5 to 10 years	undergraduate studies	negative	no impairment	30	car_occupants_vs_pedestrians	parked_van	endanger_occupants
019	male	self-driving	observer	observer	21	none	no higher education	very positive	no impairment	84	car_occupants_vs_pedestrians	parked_van	endanger_pedestrians
019	male	self-driving	observer	observer	21	none	no higher education	very positive	no impairment	64	car_occupants_vs_pedestrians	cliff	endanger_pedestrians
152	female	self-driving	observer	observer	25	5 to 10 years	undergraduate studies	neutral	no impairment	85	car_occupants_vs_pedestrians	cliff	endanger_occupants
152	female	self-driving	observer	observer	25	5 to 10 years	undergraduate studies	neutral	no impairment	78	car_occupants_vs_pedestrians	parked_van	endanger_occupants
009	male	human	observer	pedestrian	26	none	undergraduate studies	neutral	corrected vision	63	car_occupants_vs_pedestrians	cliff	endanger_occupants
009	male	human	observer	pedestrian	26	none	undergraduate studies	neutral	corrected vision	30	car_occupants_vs_pedestrians	parked_van	endanger_occupants
184	male	human	pedestrian	pedestrian	27	more than 10 years	no higher education	very positive	corrected vision	87	car_occupants_vs_pedestrians	cliff	endanger_occupants
184	male	human	pedestrian	pedestrian	27	more than 10 years	no higher education	very positive	corrected vision	82	car_occupants_vs_pedestrians	parked_van	endanger_occupants
145	female	human	passenger	passenger	19	1 to 5 years	no higher education	very negative	no impairment	0	car_occupants_vs_pedestrians	cliff	endanger_pedestrians
145	female	human	passenger	passenger	19	1 to 5 years	no higher education	very negative	no impairment	35	car_occupants_vs_pedestrians	parked_van	endanger_occupants
132	male	human	observer	observer	23	5 to 10 years	no higher education	positive	no impairment	0	car_occupants_vs_pedestrians	cliff	endanger_occupants
132	male	human	observer	observer	23	5 to 10 years	no higher education	positive	no impairment	65	car_occupants_vs_pedestrians	parked_van	endanger_occupants
090	male	human	passenger	passenger	20	1 to 5 years	no higher education	positive	uncorrected vision	87	car_occupants_vs_pedestrians	parked_van	endanger_occupants
090	male	human	passenger	passenger	20	1 to 5 years	no higher education	positive	uncorrected vision	12	car_occupants_vs_pedestrians	cliff	endanger_occupants
063	female	human	pedestrian	pedestrian	26	1 to 5 years	undergraduate studies	negative	corrected vision	10	car_occupants_vs_pedestrians	cliff	endanger_pedestrians
063	female	human	pedestrian	pedestrian	26	1 to 5 years	undergraduate studies	negative	corrected vision	0	car_occupants_vs_pedestrians	parked_van	endanger_pedestrians
093	male	human	observer	observer	22	5 to 10 years	no higher education	positive	no impairment	100	car_occupants_vs_pedestrians	cliff	endanger_occupants
093	male	human	observer	observer	22	5 to 10 years	no higher education	positive	no impairment	100	car_occupants_vs_pedestrians	parked_van	endanger_occupants
138	female	self-driving	pedestrian	pedestrian	22	1 to 5 years	no higher education	negative	corrected vision	89	car_occupants_vs_pedestrians	cliff	endanger_occupants
138	female	self-driving	pedestrian	pedestrian	22	1 to 5 years	no higher education	negative	corrected vision	86	car_occupants_vs_pedestrians	parked_van	endanger_occupants
105	male	human	pedestrian	pedestrian	26	5 to 10 years	undergraduate studies	very positive	no impairment	69	car_occupants_vs_pedestrians	cliff	endanger_occupants
105	male	human	pedestrian	pedestrian	26	5 to 10 years	undergraduate studies	very positive	no impairment	73	car_occupants_vs_pedestrians	parked_van	endanger_occupants
018	male	human	passenger	pedestrian	21	1 to 5 years	no higher education	positive	no impairment	35	car_occupants_vs_pedestrians	cliff	endanger_pedestrians
018	male	human	passenger	pedestrian	21	1 to 5 years	no higher education	positive	no impairment	92	car_occupants_vs_pedestrians	parked_van	endanger_occupants
130	female	self-driving	passenger	passenger	20	1 to 5 years	no higher education	positive	no impairment	100	car_occupants_vs_pedestrians	cliff	endanger_pedestrians
130	female	self-driving	passenger	passenger	20	1 to 5 years	no higher education	positive	no impairment	100	car_occupants_vs_pedestrians	parked_van	endanger_occupants
030	female	human	passenger	passenger	21	1 to 5 years	no higher education	very positive	corrected vision	78	car_occupants_vs_pedestrians	cliff	endanger_pedestrians
030	female	human	passenger	passenger	21	1 to 5 years	no higher education	very positive	corrected vision	59	car_occupants_vs_pedestrians	parked_van	endanger_occupants
097	male	self-driving	observer	pedestrian	20	none	no higher education	positive	no impairment	73	car_occupants_vs_pedestrians	parked_van	endanger_occupants
097	male	self-driving	observer	pedestrian	20	none	no higher education	positive	no impairment	6	car_occupants_vs_pedestrians	cliff	endanger_pedestrians
128	female	self-driving	observer	observer	24	1 to 5 years	undergraduate studies	negative	corrected vision	50	car_occupants_vs_pedestrians	parked_van	endanger_occupants
128	female	self-driving	observer	observer	24	1 to 5 years	undergraduate studies	negative	corrected vision	18	car_occupants_vs_pedestrians	cliff	endanger_occupants
179	male	human	passenger	passenger	23	5 to 10 years	no higher education	positive	no impairment	100	car_occupants_vs_pedestrians	cliff	endanger_pedestrians
179	male	human	passenger	passenger	23	5 to 10 years	no higher education	positive	no impairment	100	car_occupants_vs_pedestrians	parked_van	endanger_pedestrians
089	male	human	pedestrian	observer	26	5 to 10 years	no higher education	very positive	no impairment	100	car_occupants_vs_pedestrians	cliff	endanger_occupants
089	male	human	pedestrian	observer	26	5 to 10 years	no higher education	very positive	no impairment	100	car_occupants_vs_pedestrians	parked_van	endanger_occupants
183	female	human	pedestrian	observer	24	1 to 5 years	undergraduate studies	neutral	no impairment	50	car_occupants_vs_pedestrians	parked_van	endanger_occupants
183	female	human	pedestrian	observer	24	1 to 5 years	undergraduate studies	neutral	no impairment	0	car_occupants_vs_pedestrians	cliff	endanger_pedestrians
077	female	self-driving	passenger	passenger	21	none	undergraduate studies	very negative	corrected vision	43	car_occupants_vs_pedestrians	cliff	endanger_pedestrians
077	female	self-driving	passenger	passenger	21	none	undergraduate studies	very negative	corrected vision	100	car_occupants_vs_pedestrians	parked_van	endanger_occupants
168	female	human	pedestrian	pedestrian	19	1 to 5 years	no higher education	neutral	no impairment	18	car_occupants_vs_pedestrians	parked_van	endanger_pedestrians
168	female	human	pedestrian	pedestrian	19	1 to 5 years	no higher education	neutral	no impairment	24	car_occupants_vs_pedestrians	cliff	endanger_pedestrians
058	female	self-driving	pedestrian	pedestrian	28	more than 10 years	undergraduate studies	negative	uncorrected vision	82	car_occupants_vs_pedestrians	cliff	endanger_pedestrians
058	female	self-driving	pedestrian	pedestrian	28	more than 10 years	undergraduate studies	negative	uncorrected vision	100	car_occupants_vs_pedestrians	parked_van	endanger_occupants
118	female	self-driving	passenger	passenger	21	1 to 5 years	no higher education	positive	no impairment	14	car_occupants_vs_pedestrians	cliff	endanger_pedestrians
118	female	self-driving	passenger	passenger	21	1 to 5 years	no higher education	positive	no impairment	29	car_occupants_vs_pedestrians	parked_van	endanger_occupants
172	male	human	pedestrian	pedestrian	22	1 to 5 years	no higher education	neutral	no impairment	68	car_occupants_vs_pedestrians	parked_van	endanger_occupants
172	male	human	pedestrian	pedestrian	22	1 to 5 years	no higher education	neutral	no impairment	19	car_occupants_vs_pedestrians	cliff	endanger_occupants
124	female	self-driving	passenger	passenger	20	1 to 5 years	no higher education	positive	corrected vision	40	car_occupants_vs_pedestrians	cliff	endanger_occupants
124	female	self-driving	passenger	passenger	20	1 to 5 years	no higher education	positive	corrected vision	81	car_occupants_vs_pedestrians	parked_van	endanger_occupants
157	male	self-driving	passenger	pedestrian	20	1 to 5 years	no higher education	positive	no impairment	1	car_occupants_vs_pedestrians	cliff	endanger_occupants
157	male	self-driving	passenger	pedestrian	20	1 to 5 years	no higher education	positive	no impairment	62	car_occupants_vs_pedestrians	parked_van	endanger_occupants
075	female	self-driving	passenger	passenger	21	1 to 5 years	no higher education	negative	corrected vision	50	car_occupants_vs_pedestrians	parked_van	endanger_pedestrians
075	female	self-driving	passenger	passenger	21	1 to 5 years	no higher education	negative	corrected vision	76	car_occupants_vs_pedestrians	cliff	endanger_pedestrians
129	female	self-driving	passenger	passenger	21	none	no higher education	neutral	no impairment	72	car_occupants_vs_pedestrians	parked_van	endanger_occupants
129	female	self-driving	passenger	passenger	21	none	no higher education	neutral	no impairment	80	car_occupants_vs_pedestrians	cliff	endanger_pedestrians
028	male	self-driving	observer	passenger	30	more than 10 years	undergraduate studies	negative	corrected vision	0	car_occupants_vs_pedestrians	cliff	endanger_occupants
028	male	self-driving	observer	passenger	30	more than 10 years	undergraduate studies	negative	corrected vision	0	car_occupants_vs_pedestrians	parked_van	endanger_pedestrians
102	female	human	pedestrian	pedestrian	47	more than 10 years	no higher education	negative	no impairment	50	car_occupants_vs_pedestrians	cliff	endanger_occupants
102	female	human	pedestrian	pedestrian	47	more than 10 years	no higher education	negative	no impairment	50	car_occupants_vs_pedestrians	parked_van	endanger_pedestrians
181	male	self-driving	pedestrian	passenger	25	1 to 5 years	no higher education	neutral	no impairment	34	car_occupants_vs_pedestrians	parked_van	endanger_occupants
181	male	self-driving	pedestrian	passenger	25	1 to 5 years	no higher education	neutral	no impairment	14	car_occupants_vs_pedestrians	cliff	endanger_occupants
024	female	self-driving	pedestrian	pedestrian	23	1 to 5 years	undergraduate studies	positive	no impairment	9	car_occupants_vs_pedestrians	cliff	endanger_pedestrians
024	female	self-driving	pedestrian	pedestrian	23	1 to 5 years	undergraduate studies	positive	no impairment	80	car_occupants_vs_pedestrians	parked_van	endanger_occupants
085	male	self-driving	passenger	passenger	26	5 to 10 years	undergraduate studies	very positive	no impairment	22	car_occupants_vs_pedestrians	cliff	endanger_pedestrians
085	male	self-driving	passenger	passenger	26	5 to 10 years	undergraduate studies	very positive	no impairment	100	car_occupants_vs_pedestrians	parked_van	endanger_occupants
069	female	self-driving	observer	observer	26	5 to 10 years	graduate studies	positive	corrected vision	57	car_occupants_vs_pedestrians	parked_van	endanger_occupants
069	female	self-driving	observer	observer	26	5 to 10 years	graduate studies	positive	corrected vision	37	car_occupants_vs_pedestrians	cliff	endanger_occupants
123	male	human	passenger	passenger	20	1 to 5 years	no higher education	very positive	no impairment	79	car_occupants_vs_pedestrians	cliff	endanger_pedestrians
123	male	human	passenger	passenger	20	1 to 5 years	no higher education	very positive	no impairment	100	car_occupants_vs_pedestrians	parked_van	endanger_occupants
066	male	self-driving	pedestrian	observer	23	5 to 10 years	no higher education	positive	no impairment	100	car_occupants_vs_pedestrians	parked_van	endanger_occupants
066	male	self-driving	pedestrian	observer	23	5 to 10 years	no higher education	positive	no impairment	89	car_occupants_vs_pedestrians	cliff	endanger_occupants
076	male	human	observer	passenger	22	1 to 5 years	no higher education	positive	corrected vision	11	car_occupants_vs_pedestrians	parked_van	endanger_occupants
076	male	human	observer	passenger	22	1 to 5 years	no higher education	positive	corrected vision	55	car_occupants_vs_pedestrians	cliff	endanger_occupants
169	male	human	passenger	passenger	18	1 to 5 years	no higher education	positive	corrected vision	85	car_occupants_vs_pedestrians	parked_van	endanger_occupants
169	male	human	passenger	passenger	18	1 to 5 years	no higher education	positive	corrected vision	84	car_occupants_vs_pedestrians	cliff	endanger_occupants
096	female	self-driving	passenger	passenger	21	1 to 5 years	no higher education	negative	uncorrected vision	98	car_occupants_vs_pedestrians	parked_van	endanger_occupants
096	female	self-driving	passenger	passenger	21	1 to 5 years	no higher education	negative	uncorrected vision	0	car_occupants_vs_pedestrians	cliff	endanger_occupants
170	female	human	passenger	passenger	20	1 to 5 years	no higher education	negative	no impairment	65	car_occupants_vs_pedestrians	parked_van	endanger_occupants
170	female	human	passenger	passenger	20	1 to 5 years	no higher education	negative	no impairment	14	car_occupants_vs_pedestrians	cliff	endanger_pedestrians
042	female	human	pedestrian	observer	24	5 to 10 years	no higher education	negative	no impairment	24	car_occupants_vs_pedestrians	parked_van	endanger_occupants
042	female	human	pedestrian	observer	24	5 to 10 years	no higher education	negative	no impairment	34	car_occupants_vs_pedestrians	cliff	endanger_occupants
011	male	self-driving	passenger	passenger	25	none	no higher education	negative	no impairment	50	car_occupants_vs_pedestrians	cliff	endanger_pedestrians
011	male	self-driving	passenger	passenger	25	none	no higher education	negative	no impairment	100	car_occupants_vs_pedestrians	parked_van	endanger_occupants
034	female	human	pedestrian	observer	24	5 to 10 years	undergraduate studies	neutral	corrected vision	62	car_occupants_vs_pedestrians	cliff	endanger_pedestrians
034	female	human	pedestrian	observer	24	5 to 10 years	undergraduate studies	neutral	corrected vision	33	car_occupants_vs_pedestrians	parked_van	endanger_occupants
072	male	self-driving	observer	observer	23	1 to 5 years	no higher education	positive	uncorrected vision	36	car_occupants_vs_pedestrians	cliff	endanger_occupants
072	male	self-driving	observer	observer	23	1 to 5 years	no higher education	positive	uncorrected vision	80	car_occupants_vs_pedestrians	parked_van	endanger_occupants
178	male	self-driving	pedestrian	observer	24	1 to 5 years	no higher education	very positive	corrected vision	51	car_occupants_vs_pedestrians	cliff	endanger_occupants
178	male	self-driving	pedestrian	observer	24	1 to 5 years	no higher education	very positive	corrected vision	33	car_occupants_vs_pedestrians	parked_van	endanger_occupants
151	male	self-driving	passenger	passenger	19	1 to 5 years	no higher education	positive	corrected vision	67	car_occupants_vs_pedestrians	parked_van	endanger_pedestrians
151	male	self-driving	passenger	passenger	19	1 to 5 years	no higher education	positive	corrected vision	100	car_occupants_vs_pedestrians	cliff	endanger_pedestrians
110	female	self-driving	pedestrian	pedestrian	23	5 to 10 years	undergraduate studies	neutral	no impairment	50	car_occupants_vs_pedestrians	cliff	endanger_pedestrians
110	female	self-driving	pedestrian	pedestrian	23	5 to 10 years	undergraduate studies	neutral	no impairment	50	car_occupants_vs_pedestrians	parked_van	endanger_occupants
149	male	human	observer	passenger	24	5 to 10 years	no higher education	positive	no impairment	16	car_occupants_vs_pedestrians	cliff	endanger_pedestrians
149	male	human	observer	passenger	24	5 to 10 years	no higher education	positive	no impairment	78	car_occupants_vs_pedestrians	parked_van	endanger_occupants
073	male	human	observer	observer	21	none	no higher education	very positive	no impairment	0	car_occupants_vs_pedestrians	cliff	endanger_pedestrians
073	male	human	observer	observer	21	none	no higher education	very positive	no impairment	81	car_occupants_vs_pedestrians	parked_van	endanger_occupants
031	male	self-driving	pedestrian	pedestrian	22	5 to 10 years	no higher education	positive	corrected vision	97	car_occupants_vs_pedestrians	parked_van	endanger_occupants
031	male	self-driving	pedestrian	pedestrian	22	5 to 10 years	no higher education	positive	corrected vision	89	car_occupants_vs_pedestrians	cliff	endanger_pedestrians
050	female	human	observer	passenger	22	5 to 10 years	undergraduate studies	positive	no impairment	78	car_occupants_vs_pedestrians	parked_van	endanger_occupants
050	female	human	observer	passenger	22	5 to 10 years	undergraduate studies	positive	no impairment	70	car_occupants_vs_pedestrians	cliff	endanger_occupants
116	male	human	pedestrian	observer	26	none	undergraduate studies	positive	corrected vision	8	car_occupants_vs_pedestrians	parked_van	endanger_pedestrians
116	male	human	pedestrian	observer	26	none	undergraduate studies	positive	corrected vision	32	car_occupants_vs_pedestrians	cliff	endanger_occupants
020	male	self-driving	pedestrian	observer	27	5 to 10 years	no higher education	very positive	corrected vision	100	car_occupants_vs_pedestrians	parked_van	endanger_occupants
020	male	self-driving	pedestrian	observer	27	5 to 10 years	no higher education	very positive	corrected vision	100	car_occupants_vs_pedestrians	cliff	endanger_pedestrians
142	male	self-driving	observer	observer	19	1 to 5 years	no higher education	positive	no impairment	100	car_occupants_vs_pedestrians	parked_van	endanger_occupants
142	male	self-driving	observer	observer	19	1 to 5 years	no higher education	positive	no impairment	48	car_occupants_vs_pedestrians	cliff	endanger_occupants
082	female	human	pedestrian	observer	20	1 to 5 years	no higher education	neutral	corrected vision	21	car_occupants_vs_pedestrians	cliff	endanger_pedestrians
082	female	human	pedestrian	observer	20	1 to 5 years	no higher education	neutral	corrected vision	80	car_occupants_vs_pedestrians	parked_van	endanger_occupants
062	female	self-driving	pedestrian	observer	22	1 to 5 years	undergraduate studies	negative	no impairment	100	car_occupants_vs_pedestrians	parked_van	endanger_occupants
062	female	self-driving	pedestrian	observer	22	1 to 5 years	undergraduate studies	negative	no impairment	8	car_occupants_vs_pedestrians	cliff	endanger_occupants
140	female	self-driving	pedestrian	observer	22	5 to 10 years	no higher education	positive	no impairment	76	car_occupants_vs_pedestrians	cliff	endanger_occupants
140	female	self-driving	pedestrian	observer	22	5 to 10 years	no higher education	positive	no impairment	64	car_occupants_vs_pedestrians	parked_van	endanger_occupants
036	male	self-driving	pedestrian	pedestrian	20	1 to 5 years	no higher education	positive	no impairment	73	car_occupants_vs_pedestrians	parked_van	endanger_occupants
036	male	self-driving	pedestrian	pedestrian	20	1 to 5 years	no higher education	positive	no impairment	68	car_occupants_vs_pedestrians	cliff	endanger_pedestrians
012	female	self-driving	observer	observer	19	1 to 5 years	no higher education	very negative	no impairment	24	car_occupants_vs_pedestrians	cliff	endanger_pedestrians
012	female	self-driving	observer	observer	19	1 to 5 years	no higher education	very negative	no impairment	91	car_occupants_vs_pedestrians	parked_van	endanger_occupants
032	female	human	pedestrian	pedestrian	29	more than 10 years	no higher education	positive	uncorrected vision	39	car_occupants_vs_pedestrians	cliff	endanger_occupants
032	female	human	pedestrian	pedestrian	29	more than 10 years	no higher education	positive	uncorrected vision	4	car_occupants_vs_pedestrians	parked_van	endanger_pedestrians
006	female	human	pedestrian	observer	24	none	undergraduate studies	positive	corrected vision	100	car_occupants_vs_pedestrians	parked_van	endanger_occupants
006	female	human	pedestrian	observer	24	none	undergraduate studies	positive	corrected vision	50	car_occupants_vs_pedestrians	cliff	endanger_pedestrians
025	male	self-driving	observer	pedestrian	20	1 to 5 years	no higher education	negative	corrected vision	61	car_occupants_vs_pedestrians	cliff	endanger_occupants
025	male	self-driving	observer	pedestrian	20	1 to 5 years	no higher education	negative	corrected vision	70	car_occupants_vs_pedestrians	parked_van	endanger_occupants
100	male	self-driving	pedestrian	observer	22	1 to 5 years	undergraduate studies	very positive	no impairment	14	car_occupants_vs_pedestrians	parked_van	endanger_pedestrians
100	male	self-driving	pedestrian	observer	22	1 to 5 years	undergraduate studies	very positive	no impairment	3	car_occupants_vs_pedestrians	cliff	endanger_pedestrians
007	female	human	observer	passenger	20	none	no higher education	negative	no impairment	100	car_occupants_vs_pedestrians	parked_van	endanger_occupants
007	female	human	observer	passenger	20	none	no higher education	negative	no impairment	23	car_occupants_vs_pedestrians	cliff	endanger_occupants
070	male	self-driving	pedestrian	pedestrian	22	none	no higher education	positive	corrected vision	37	car_occupants_vs_pedestrians	cliff	endanger_occupants
070	male	self-driving	pedestrian	pedestrian	22	none	no higher education	positive	corrected vision	60	car_occupants_vs_pedestrians	parked_van	endanger_occupants
144	male	self-driving	pedestrian	observer	20	1 to 5 years	no higher education	neutral	uncorrected vision	100	car_occupants_vs_pedestrians	parked_van	endanger_occupants
144	male	self-driving	pedestrian	observer	20	1 to 5 years	no higher education	neutral	uncorrected vision	34	car_occupants_vs_pedestrians	cliff	endanger_pedestrians
091	male	human	pedestrian	pedestrian	28	none	undergraduate studies	very positive	no impairment	100	car_occupants_vs_pedestrians	parked_van	endanger_occupants
091	male	human	pedestrian	pedestrian	28	none	undergraduate studies	very positive	no impairment	0	car_occupants_vs_pedestrians	cliff	endanger_pedestrians
080	female	self-driving	observer	observer	20	1 to 5 years	no higher education	positive	no impairment	81	car_occupants_vs_pedestrians	parked_van	endanger_occupants
080	female	self-driving	observer	observer	20	1 to 5 years	no higher education	positive	no impairment	22	car_occupants_vs_pedestrians	cliff	endanger_occupants
126	female	human	passenger	passenger	21	1 to 5 years	no higher education	negative	corrected vision	50	car_occupants_vs_pedestrians	parked_van	endanger_occupants
126	female	human	passenger	passenger	21	1 to 5 years	no higher education	negative	corrected vision	30	car_occupants_vs_pedestrians	cliff	endanger_occupants
173	male	self-driving	observer	pedestrian	30	5 to 10 years	undergraduate studies	very positive	no impairment	22	car_occupants_vs_pedestrians	parked_van	endanger_occupants
173	male	self-driving	observer	pedestrian	30	5 to 10 years	undergraduate studies	very positive	no impairment	0	car_occupants_vs_pedestrians	cliff	endanger_occupants
162	male	self-driving	passenger	passenger	22	1 to 5 years	no higher education	very positive	uncorrected vision	15	car_occupants_vs_pedestrians	cliff	endanger_occupants
162	male	self-driving	passenger	passenger	22	1 to 5 years	no higher education	very positive	uncorrected vision	73	car_occupants_vs_pedestrians	parked_van	endanger_occupants
134	male	self-driving	passenger	passenger	20	1 to 5 years	no higher education	very negative	no impairment	100	car_occupants_vs_pedestrians	parked_van	endanger_occupants
134	male	self-driving	passenger	passenger	20	1 to 5 years	no higher education	very negative	no impairment	0	car_occupants_vs_pedestrians	cliff	endanger_pedestrians
067	male	human	observer	observer	20	1 to 5 years	no higher education	positive	no impairment	68	car_occupants_vs_pedestrians	cliff	endanger_occupants
067	male	human	observer	observer	20	1 to 5 years	no higher education	positive	no impairment	100	car_occupants_vs_pedestrians	parked_van	endanger_occupants
156	male	human	pedestrian	pedestrian	21	1 to 5 years	undergraduate studies	very positive	uncorrected vision	100	car_occupants_vs_pedestrians	parked_van	endanger_occupants
156	male	human	pedestrian	pedestrian	21	1 to 5 years	undergraduate studies	very positive	uncorrected vision	17	car_occupants_vs_pedestrians	cliff	endanger_occupants
037	female	self-driving	pedestrian	pedestrian	19	1 to 5 years	no higher education	negative	uncorrected vision	100	car_occupants_vs_pedestrians	parked_van	endanger_occupants
037	female	self-driving	pedestrian	pedestrian	19	1 to 5 years	no higher education	negative	uncorrected vision	18	car_occupants_vs_pedestrians	cliff	endanger_occupants
056	female	human	observer	observer	19	1 to 5 years	no higher education	neutral	no impairment	38	car_occupants_vs_pedestrians	parked_van	endanger_occupants
056	female	human	observer	observer	19	1 to 5 years	no higher education	neutral	no impairment	22	car_occupants_vs_pedestrians	cliff	endanger_pedestrians
054	male	self-driving	pedestrian	observer	18	1 to 5 years	no higher education	very positive	corrected vision	85	car_occupants_vs_pedestrians	cliff	endanger_pedestrians
054	male	self-driving	pedestrian	observer	18	1 to 5 years	no higher education	very positive	corrected vision	14	car_occupants_vs_pedestrians	parked_van	endanger_pedestrians
135	female	self-driving	pedestrian	observer	20	none	no higher education	positive	no impairment	100	car_occupants_vs_pedestrians	parked_van	endanger_occupants
135	female	self-driving	pedestrian	observer	20	none	no higher education	positive	no impairment	78	car_occupants_vs_pedestrians	cliff	endanger_occupants
120	male	self-driving	pedestrian	observer	19	1 to 5 years	no higher education	positive	corrected vision	51	car_occupants_vs_pedestrians	cliff	endanger_occupants
120	male	self-driving	pedestrian	observer	19	1 to 5 years	no higher education	positive	corrected vision	31	car_occupants_vs_pedestrians	parked_van	endanger_occupants
101	male	human	pedestrian	pedestrian	24	5 to 10 years	undergraduate studies	neutral	corrected vision	30	car_occupants_vs_pedestrians	cliff	endanger_occupants
101	male	human	pedestrian	pedestrian	24	5 to 10 years	undergraduate studies	neutral	corrected vision	60	car_occupants_vs_pedestrians	parked_van	endanger_occupants
160	female	self-driving	observer	observer	24	5 to 10 years	undergraduate studies	neutral	no impairment	65	car_occupants_vs_pedestrians	parked_van	endanger_occupants
160	female	self-driving	observer	observer	24	5 to 10 years	undergraduate studies	neutral	no impairment	60	car_occupants_vs_pedestrians	cliff	endanger_occupants
165	male	self-driving	pedestrian	pedestrian	22	1 to 5 years	no higher education	neutral	no impairment	100	car_occupants_vs_pedestrians	cliff	endanger_pedestrians
165	male	self-driving	pedestrian	pedestrian	22	1 to 5 years	no higher education	neutral	no impairment	35	car_occupants_vs_pedestrians	parked_van	endanger_occupants
051	female	self-driving	pedestrian	pedestrian	24	1 to 5 years	undergraduate studies	neutral	corrected vision	60	car_occupants_vs_pedestrians	parked_van	endanger_occupants
051	female	self-driving	pedestrian	pedestrian	24	1 to 5 years	undergraduate studies	neutral	corrected vision	50	car_occupants_vs_pedestrians	cliff	endanger_pedestrians
122	female	human	observer	observer	20	none	no higher education	positive	uncorrected vision	28	car_occupants_vs_pedestrians	cliff	endanger_occupants
122	female	human	observer	observer	20	none	no higher education	positive	uncorrected vision	100	car_occupants_vs_pedestrians	parked_van	endanger_occupants
174	male	human	pedestrian	pedestrian	25	5 to 10 years	no higher education	very positive	corrected vision	100	car_occupants_vs_pedestrians	cliff	endanger_occupants
174	male	human	pedestrian	pedestrian	25	5 to 10 years	no higher education	very positive	corrected vision	100	car_occupants_vs_pedestrians	parked_van	endanger_occupants
139	female	self-driving	pedestrian	observer	25	5 to 10 years	no higher education	negative	no impairment	28	car_occupants_vs_pedestrians	cliff	endanger_occupants
139	female	self-driving	pedestrian	observer	25	5 to 10 years	no higher education	negative	no impairment	58	car_occupants_vs_pedestrians	parked_van	endanger_occupants
061	male	human	passenger	passenger	28	1 to 5 years	no higher education	positive	no impairment	100	car_occupants_vs_pedestrians	parked_van	endanger_occupants
061	male	human	passenger	passenger	28	1 to 5 years	no higher education	positive	no impairment	72	car_occupants_vs_pedestrians	cliff	endanger_pedestrians
046	female	human	pedestrian	observer	18	1 to 5 years	no higher education	very negative	uncorrected vision	100	car_occupants_vs_pedestrians	cliff	endanger_occupants
046	female	human	pedestrian	observer	18	1 to 5 years	no higher education	very negative	uncorrected vision	100	car_occupants_vs_pedestrians	parked_van	endanger_occupants
026	female	human	passenger	passenger	21	none	no higher education	neutral	no impairment	75	car_occupants_vs_pedestrians	cliff	endanger_pedestrians
026	female	human	passenger	passenger	21	none	no higher education	neutral	no impairment	100	car_occupants_vs_pedestrians	parked_van	endanger_occupants
016	male	self-driving	pedestrian	observer	21	1 to 5 years	no higher education	positive	no impairment	23	car_occupants_vs_pedestrians	cliff	endanger_occupants
016	male	self-driving	pedestrian	observer	21	1 to 5 years	no higher education	positive	no impairment	98	car_occupants_vs_pedestrians	parked_van	endanger_occupants
125	male	human	pedestrian	pedestrian	20	1 to 5 years	no higher education	very positive	no impairment	100	car_occupants_vs_pedestrians	cliff	endanger_pedestrians
125	male	human	pedestrian	pedestrian	20	1 to 5 years	no higher education	very positive	no impairment	100	car_occupants_vs_pedestrians	parked_van	endanger_occupants
148	male	self-driving	passenger	passenger	25	5 to 10 years	undergraduate studies	neutral	uncorrected vision	17	car_occupants_vs_pedestrians	parked_van	endanger_occupants
148	male	self-driving	passenger	passenger	25	5 to 10 years	undergraduate studies	neutral	uncorrected vision	35	car_occupants_vs_pedestrians	cliff	endanger_pedestrians
053	female	human	pedestrian	observer	22	1 to 5 years	undergraduate studies	neutral	no impairment	100	car_occupants_vs_pedestrians	cliff	endanger_occupants
053	female	human	pedestrian	observer	22	1 to 5 years	undergraduate studies	neutral	no impairment	91	car_occupants_vs_pedestrians	parked_van	endanger_occupants
055	female	human	passenger	passenger	20	none	no higher education	neutral	no impairment	89	car_occupants_vs_pedestrians	parked_van	endanger_occupants
055	female	human	passenger	passenger	20	none	no higher education	neutral	no impairment	0	car_occupants_vs_pedestrians	cliff	endanger_pedestrians
109	female	human	observer	observer	26	5 to 10 years	no higher education	neutral	no impairment	100	car_occupants_vs_pedestrians	parked_van	endanger_occupants
109	female	human	observer	observer	26	5 to 10 years	no higher education	neutral	no impairment	82	car_occupants_vs_pedestrians	cliff	endanger_pedestrians
104	male	human	passenger	observer	25	5 to 10 years	undergraduate studies	positive	corrected vision	100	car_occupants_vs_pedestrians	cliff	endanger_occupants
104	male	human	passenger	observer	25	5 to 10 years	undergraduate studies	positive	corrected vision	50	car_occupants_vs_pedestrians	parked_van	endanger_pedestrians
095	male	self-driving	observer	observer	21	1 to 5 years	no higher education	negative	no impairment	38	car_occupants_vs_pedestrians	parked_van	endanger_occupants
095	male	self-driving	observer	observer	21	1 to 5 years	no higher education	negative	no impairment	37	car_occupants_vs_pedestrians	cliff	endanger_occupants
117	male	human	passenger	observer	22	1 to 5 years	no higher education	neutral	corrected vision	10	car_occupants_vs_pedestrians	cliff	endanger_pedestrians
117	male	human	passenger	observer	22	1 to 5 years	no higher education	neutral	corrected vision	100	car_occupants_vs_pedestrians	parked_van	endanger_occupants
161	female	human	passenger	passenger	20	1 to 5 years	no higher education	positive	no impairment	36	car_occupants_vs_pedestrians	cliff	endanger_pedestrians
161	female	human	passenger	passenger	20	1 to 5 years	no higher education	positive	no impairment	49	car_occupants_vs_pedestrians	parked_van	endanger_occupants
060	female	self-driving	observer	observer	25	5 to 10 years	no higher education	neutral	no impairment	19	car_occupants_vs_pedestrians	cliff	endanger_occupants
060	female	self-driving	observer	observer	25	5 to 10 years	no higher education	neutral	no impairment	100	car_occupants_vs_pedestrians	parked_van	endanger_occupants
068	male	human	pedestrian	pedestrian	24	5 to 10 years	undergraduate studies	very positive	corrected vision	24	car_occupants_vs_pedestrians	cliff	endanger_pedestrians
068	male	human	pedestrian	pedestrian	24	5 to 10 years	undergraduate studies	very positive	corrected vision	93	car_occupants_vs_pedestrians	parked_van	endanger_occupants
137	male	self-driving	observer	observer	31	more than 10 years	undergraduate studies	positive	corrected vision	38	car_occupants_vs_pedestrians	cliff	endanger_pedestrians
137	male	self-driving	observer	observer	31	more than 10 years	undergraduate studies	positive	corrected vision	27	car_occupants_vs_pedestrians	parked_van	endanger_occupants
115	male	human	observer	passenger	27	5 to 10 years	graduate studies	very positive	corrected vision	3	car_occupants_vs_pedestrians	cliff	endanger_occupants
115	male	human	observer	passenger	27	5 to 10 years	graduate studies	very positive	corrected vision	65	car_occupants_vs_pedestrians	parked_van	endanger_occupants
043	female	human	pedestrian	pedestrian	20	none	no higher education	neutral	no impairment	46	car_occupants_vs_pedestrians	cliff	endanger_occupants
043	female	human	pedestrian	pedestrian	20	none	no higher education	neutral	no impairment	100	car_occupants_vs_pedestrians	parked_van	endanger_occupants
039	female	self-driving	pedestrian	pedestrian	24	5 to 10 years	no higher education	negative	no impairment	26	car_occupants_vs_pedestrians	cliff	endanger_pedestrians
039	female	self-driving	pedestrian	pedestrian	24	5 to 10 years	no higher education	negative	no impairment	41	car_occupants_vs_pedestrians	parked_van	endanger_occupants
084	female	human	passenger	passenger	25	5 to 10 years	no higher education	negative	corrected vision	100	car_occupants_vs_pedestrians	parked_van	endanger_occupants
084	female	human	passenger	passenger	25	5 to 10 years	no higher education	negative	corrected vision	60	car_occupants_vs_pedestrians	cliff	endanger_occupants
106	female	human	observer	passenger	23	5 to 10 years	undergraduate studies	neutral	no impairment	100	car_occupants_vs_pedestrians	parked_van	endanger_occupants
106	female	human	observer	passenger	23	5 to 10 years	undergraduate studies	neutral	no impairment	0	car_occupants_vs_pedestrians	cliff	endanger_pedestrians
048	female	self-driving	observer	passenger	25	none	graduate studies	neutral	corrected vision	100	car_occupants_vs_pedestrians	parked_van	endanger_occupants
048	female	self-driving	observer	passenger	25	none	graduate studies	neutral	corrected vision	94	car_occupants_vs_pedestrians	cliff	endanger_occupants
146	male	human	pedestrian	observer	20	1 to 5 years	no higher education	positive	corrected vision	100	car_occupants_vs_pedestrians	cliff	endanger_pedestrians
146	male	human	pedestrian	observer	20	1 to 5 years	no higher education	positive	corrected vision	100	car_occupants_vs_pedestrians	parked_van	endanger_occupants
045	male	human	pedestrian	pedestrian	23	1 to 5 years	no higher education	positive	no impairment	68	car_occupants_vs_pedestrians	cliff	endanger_occupants
045	male	human	pedestrian	pedestrian	23	1 to 5 years	no higher education	positive	no impairment	77	car_occupants_vs_pedestrians	parked_van	endanger_occupants
133	female	human	pedestrian	pedestrian	21	1 to 5 years	no higher education	very negative	corrected vision	100	car_occupants_vs_pedestrians	parked_van	endanger_occupants
133	female	human	pedestrian	pedestrian	21	1 to 5 years	no higher education	very negative	corrected vision	100	car_occupants_vs_pedestrians	cliff	endanger_occupants
087	female	self-driving	pedestrian	pedestrian	23	1 to 5 years	no higher education	very positive	no impairment	0	car_occupants_vs_pedestrians	cliff	endanger_pedestrians
087	female	self-driving	pedestrian	pedestrian	23	1 to 5 years	no higher education	very positive	no impairment	100	car_occupants_vs_pedestrians	parked_van	endanger_occupants
175	male	self-driving	passenger	passenger	21	1 to 5 years	no higher education	positive	no impairment	73	car_occupants_vs_pedestrians	parked_van	endanger_occupants
175	male	self-driving	passenger	passenger	21	1 to 5 years	no higher education	positive	no impairment	59	car_occupants_vs_pedestrians	cliff	endanger_occupants
081	female	human	observer	observer	21	1 to 5 years	no higher education	positive	no impairment	100	car_occupants_vs_pedestrians	parked_van	endanger_occupants
081	female	human	observer	observer	21	1 to 5 years	no higher education	positive	no impairment	32	car_occupants_vs_pedestrians	cliff	endanger_pedestrians
094	female	self-driving	pedestrian	pedestrian	30	none	undergraduate studies	negative	corrected vision	100	car_occupants_vs_pedestrians	cliff	endanger_occupants
094	female	self-driving	pedestrian	pedestrian	30	none	undergraduate studies	negative	corrected vision	100	car_occupants_vs_pedestrians	parked_van	endanger_occupants
177	female	human	observer	observer	40	more than 10 years	graduate studies	neutral	no impairment	50	car_occupants_vs_pedestrians	cliff	endanger_pedestrians
177	female	human	observer	observer	40	more than 10 years	graduate studies	neutral	no impairment	50	car_occupants_vs_pedestrians	parked_van	endanger_occupants
098	female	self-driving	observer	observer	25	5 to 10 years	graduate studies	neutral	no impairment	83	car_occupants_vs_pedestrians	parked_van	endanger_occupants
098	female	self-driving	observer	observer	25	5 to 10 years	graduate studies	neutral	no impairment	22	car_occupants_vs_pedestrians	cliff	endanger_pedestrians
071	female	human	observer	observer	20	none	no higher education	neutral	no impairment	69	car_occupants_vs_pedestrians	cliff	endanger_pedestrians
071	female	human	observer	observer	20	none	no higher education	neutral	no impairment	69	car_occupants_vs_pedestrians	parked_van	endanger_occupants
131	male	human	passenger	passenger	32	more than 10 years	undergraduate studies	very negative	no impairment	100	car_occupants_vs_pedestrians	parked_van	endanger_occupants
131	male	human	passenger	passenger	32	more than 10 years	undergraduate studies	very negative	no impairment	72	car_occupants_vs_pedestrians	cliff	endanger_pedestrians
017	female	self-driving	observer	observer	18	none	no higher education	negative	corrected vision	10	car_occupants_vs_pedestrians	parked_van	endanger_pedestrians
017	female	self-driving	observer	observer	18	none	no higher education	negative	corrected vision	0	car_occupants_vs_pedestrians	cliff	endanger_occupants
035	male	self-driving	passenger	observer	20	1 to 5 years	no higher education	very positive	corrected vision	82	car_occupants_vs_pedestrians	cliff	endanger_pedestrians
035	male	self-driving	passenger	observer	20	1 to 5 years	no higher education	very positive	corrected vision	81	car_occupants_vs_pedestrians	parked_van	endanger_occupants
044	male	self-driving	observer	observer	25	5 to 10 years	no higher education	very positive	no impairment	50	car_occupants_vs_pedestrians	cliff	endanger_pedestrians
044	male	self-driving	observer	observer	25	5 to 10 years	no higher education	very positive	no impairment	23	car_occupants_vs_pedestrians	parked_van	endanger_occupants
023	female	human	pedestrian	observer	22	none	no higher education	very negative	corrected vision	72	car_occupants_vs_pedestrians	parked_van	endanger_pedestrians
023	female	human	pedestrian	observer	22	none	no higher education	very negative	corrected vision	14	car_occupants_vs_pedestrians	cliff	endanger_occupants
176	male	self-driving	pedestrian	pedestrian	30	more than 10 years	no higher education	positive	corrected vision	100	car_occupants_vs_pedestrians	cliff	endanger_occupants
176	male	self-driving	pedestrian	pedestrian	30	more than 10 years	no higher education	positive	corrected vision	100	car_occupants_vs_pedestrians	parked_van	endanger_occupants
108	male	human	pedestrian	pedestrian	23	1 to 5 years	no higher education	positive	no impairment	100	car_occupants_vs_pedestrians	cliff	endanger_occupants
108	male	human	pedestrian	pedestrian	23	1 to 5 years	no higher education	positive	no impairment	66	car_occupants_vs_pedestrians	parked_van	endanger_occupants
021	female	human	passenger	observer	21	1 to 5 years	no higher education	neutral	uncorrected vision	7	car_occupants_vs_pedestrians	cliff	endanger_occupants
021	female	human	passenger	observer	21	1 to 5 years	no higher education	neutral	uncorrected vision	100	car_occupants_vs_pedestrians	parked_van	endanger_occupants
014	female	self-driving	passenger	observer	24	5 to 10 years	no higher education	negative	corrected vision	74	car_occupants_vs_pedestrians	parked_van	endanger_occupants
014	female	self-driving	passenger	observer	24	5 to 10 years	no higher education	negative	corrected vision	73	car_occupants_vs_pedestrians	cliff	endanger_pedestrians
052	male	self-driving	pedestrian	pedestrian	27	5 to 10 years	no higher education	negative	no impairment	87	car_occupants_vs_pedestrians	cliff	endanger_pedestrians
052	male	self-driving	pedestrian	pedestrian	27	5 to 10 years	no higher education	negative	no impairment	88	car_occupants_vs_pedestrians	parked_van	endanger_pedestrians
107	female	human	observer	pedestrian	23	1 to 5 years	no higher education	very negative	no impairment	84	car_occupants_vs_pedestrians	parked_van	endanger_occupants
107	female	human	observer	pedestrian	23	1 to 5 years	no higher education	very negative	no impairment	22	car_occupants_vs_pedestrians	cliff	endanger_pedestrians
004	male	self-driving	pedestrian	pedestrian	30	5 to 10 years	graduate studies	very positive	corrected vision	100	car_occupants_vs_pedestrians	parked_van	endanger_occupants
004	male	self-driving	pedestrian	pedestrian	30	5 to 10 years	graduate studies	very positive	corrected vision	100	car_occupants_vs_pedestrians	cliff	endanger_occupants
163	male	human	observer	observer	29	none	no higher education	very positive	no impairment	66	car_occupants_vs_pedestrians	parked_van	endanger_occupants
163	male	human	observer	observer	29	none	no higher education	very positive	no impairment	92	car_occupants_vs_pedestrians	cliff	endanger_occupants
027	male	human	observer	observer	25	5 to 10 years	no higher education	neutral	corrected vision	84	car_occupants_vs_pedestrians	cliff	endanger_occupants
027	male	human	observer	observer	25	5 to 10 years	no higher education	neutral	corrected vision	100	car_occupants_vs_pedestrians	parked_van	endanger_occupants
159	female	self-driving	pedestrian	pedestrian	19	1 to 5 years	no higher education	negative	corrected vision	27	car_occupants_vs_pedestrians	parked_van	endanger_occupants
159	female	self-driving	pedestrian	pedestrian	19	1 to 5 years	no higher education	negative	corrected vision	0	car_occupants_vs_pedestrians	cliff	endanger_pedestrians
103	female	human	observer	observer	25	5 to 10 years	no higher education	neutral	no impairment	100	car_occupants_vs_pedestrians	cliff	endanger_occupants
103	female	human	observer	observer	25	5 to 10 years	no higher education	neutral	no impairment	100	car_occupants_vs_pedestrians	parked_van	endanger_occupants
127	male	human	pedestrian	pedestrian	27	1 to 5 years	no higher education	positive	corrected vision	23	car_occupants_vs_pedestrians	cliff	endanger_occupants
127	male	human	pedestrian	pedestrian	27	1 to 5 years	no higher education	positive	corrected vision	100	car_occupants_vs_pedestrians	parked_van	endanger_occupants
038	male	self-driving	pedestrian	pedestrian	21	none	no higher education	neutral	corrected vision	85	car_occupants_vs_pedestrians	cliff	endanger_occupants
038	male	self-driving	pedestrian	pedestrian	21	none	no higher education	neutral	corrected vision	100	car_occupants_vs_pedestrians	parked_van	endanger_occupants
064	male	human	pedestrian	pedestrian	24	1 to 5 years	no higher education	very positive	no impairment	100	car_occupants_vs_pedestrians	parked_van	endanger_occupants
064	male	human	pedestrian	pedestrian	24	1 to 5 years	no higher education	very positive	no impairment	100	car_occupants_vs_pedestrians	cliff	endanger_occupants
182	male	self-driving	observer	passenger	20	1 to 5 years	no higher education	negative	no impairment	36	car_occupants_vs_pedestrians	parked_van	endanger_pedestrians
182	male	self-driving	observer	passenger	20	1 to 5 years	no higher education	negative	no impairment	5	car_occupants_vs_pedestrians	cliff	endanger_pedestrians
074	female	human	pedestrian	observer	20	1 to 5 years	no higher education	neutral	no impairment	21	car_occupants_vs_pedestrians	parked_van	endanger_occupants
074	female	human	pedestrian	observer	20	1 to 5 years	no higher education	neutral	no impairment	28	car_occupants_vs_pedestrians	cliff	endanger_pedestrians
153	male	human	passenger	passenger	21	1 to 5 years	no higher education	very positive	uncorrected vision	100	car_occupants_vs_pedestrians	cliff	endanger_pedestrians
153	male	human	passenger	passenger	21	1 to 5 years	no higher education	very positive	uncorrected vision	100	car_occupants_vs_pedestrians	parked_van	endanger_occupants
013	male	self-driving	pedestrian	pedestrian	47	more than 10 years	graduate studies	negative	corrected vision	100	car_occupants_vs_pedestrians	parked_van	endanger_occupants
013	male	self-driving	pedestrian	pedestrian	47	more than 10 years	graduate studies	negative	corrected vision	100	car_occupants_vs_pedestrians	cliff	endanger_occupants
040	male	self-driving	observer	observer	20	1 to 5 years	no higher education	very positive	corrected vision	66	car_occupants_vs_pedestrians	parked_van	endanger_pedestrians
040	male	self-driving	observer	observer	20	1 to 5 years	no higher education	very positive	corrected vision	86	car_occupants_vs_pedestrians	cliff	endanger_pedestrians
150	male	human	pedestrian	pedestrian	20	1 to 5 years	no higher education	very positive	corrected vision	83	car_occupants_vs_pedestrians	cliff	endanger_pedestrians
150	male	human	pedestrian	pedestrian	20	1 to 5 years	no higher education	very positive	corrected vision	36	car_occupants_vs_pedestrians	parked_van	endanger_occupants
078	male	human	observer	passenger	23	5 to 10 years	no higher education	negative	corrected vision	34	car_occupants_vs_pedestrians	parked_van	endanger_occupants
078	male	human	observer	passenger	23	5 to 10 years	no higher education	negative	corrected vision	91	car_occupants_vs_pedestrians	cliff	endanger_occupants
086	female	self-driving	passenger	passenger	23	1 to 5 years	no higher education	neutral	no impairment	62	car_occupants_vs_pedestrians	cliff	endanger_pedestrians
086	female	self-driving	passenger	passenger	23	1 to 5 years	no higher education	neutral	no impairment	69	car_occupants_vs_pedestrians	parked_van	endanger_occupants
003	male	self-driving	pedestrian	observer	30	more than 10 years	no higher education	negative	corrected vision	100	car_occupants_vs_pedestrians	parked_van	endanger_occupants
003	male	self-driving	pedestrian	observer	30	more than 10 years	no higher education	negative	corrected vision	100	car_occupants_vs_pedestrians	cliff	endanger_occupants
158	female	self-driving	passenger	passenger	19	1 to 5 years	no higher education	neutral	no impairment	67	car_occupants_vs_pedestrians	cliff	endanger_occupants
158	female	self-driving	passenger	passenger	19	1 to 5 years	no higher education	neutral	no impairment	69	car_occupants_vs_pedestrians	parked_van	endanger_occupants
047	male	self-driving	pedestrian	observer	24	5 to 10 years	no higher education	positive	no impairment	100	car_occupants_vs_pedestrians	parked_van	endanger_occupants
047	male	self-driving	pedestrian	observer	24	5 to 10 years	no higher education	positive	no impairment	18	car_occupants_vs_pedestrians	cliff	endanger_occupants
155	female	human	pedestrian	pedestrian	30	none	no higher education	neutral	corrected vision	50	car_occupants_vs_pedestrians	cliff	endanger_pedestrians
155	female	human	pedestrian	pedestrian	30	none	no higher education	neutral	corrected vision	53	car_occupants_vs_pedestrians	parked_van	endanger_occupants
154	female	human	pedestrian	pedestrian	19	1 to 5 years	no higher education	negative	no impairment	87	car_occupants_vs_pedestrians	parked_van	endanger_occupants
154	female	human	pedestrian	pedestrian	19	1 to 5 years	no higher education	negative	no impairment	64	car_occupants_vs_pedestrians	cliff	endanger_pedestrians
092	male	human	pedestrian	pedestrian	20	1 to 5 years	no higher education	positive	no impairment	1	car_occupants_vs_pedestrians	cliff	endanger_pedestrians
092	male	human	pedestrian	pedestrian	20	1 to 5 years	no higher education	positive	no impairment	69	car_occupants_vs_pedestrians	parked_van	endanger_occupants
119	male	human	pedestrian	observer	19	1 to 5 years	no higher education	neutral	no impairment	77	car_occupants_vs_pedestrians	parked_van	endanger_occupants
119	male	human	pedestrian	observer	19	1 to 5 years	no higher education	neutral	no impairment	81	car_occupants_vs_pedestrians	cliff	endanger_pedestrians
143	female	self-driving	pedestrian	passenger	21	1 to 5 years	no higher education	neutral	corrected vision	73	car_occupants_vs_pedestrians	parked_van	endanger_occupants
143	female	self-driving	pedestrian	passenger	21	1 to 5 years	no higher education	neutral	corrected vision	11	car_occupants_vs_pedestrians	cliff	endanger_pedestrians
167	male	human	pedestrian	pedestrian	25	5 to 10 years	undergraduate studies	positive	no impairment	26	car_occupants_vs_pedestrians	parked_van	endanger_pedestrians
167	male	human	pedestrian	pedestrian	25	5 to 10 years	undergraduate studies	positive	no impairment	28	car_occupants_vs_pedestrians	cliff	endanger_pedestrians
136	female	human	passenger	observer	19	none	no higher education	neutral	uncorrected vision	65	car_occupants_vs_pedestrians	parked_van	endanger_occupants
136	female	human	passenger	observer	19	none	no higher education	neutral	uncorrected vision	17	car_occupants_vs_pedestrians	cliff	endanger_occupants
141	male	human	pedestrian	observer	22	5 to 10 years	no higher education	very negative	no impairment	73	car_occupants_vs_pedestrians	parked_van	endanger_occupants
141	male	human	pedestrian	observer	22	5 to 10 years	no higher education	very negative	no impairment	84	car_occupants_vs_pedestrians	cliff	endanger_occupants
033	female	human	pedestrian	observer	19	1 to 5 years	no higher education	very positive	uncorrected vision	38	car_occupants_vs_pedestrians	cliff	endanger_pedestrians
033	female	human	pedestrian	observer	19	1 to 5 years	no higher education	very positive	uncorrected vision	82	car_occupants_vs_pedestrians	parked_van	endanger_occupants
088	female	self-driving	pedestrian	pedestrian	19	1 to 5 years	no higher education	negative	no impairment	73	car_occupants_vs_pedestrians	cliff	endanger_occupants
088	female	self-driving	pedestrian	pedestrian	19	1 to 5 years	no higher education	negative	no impairment	72	car_occupants_vs_pedestrians	parked_van	endanger_occupants
114	female	self-driving	pedestrian	pedestrian	19	1 to 5 years	no higher education	neutral	corrected vision	21	car_occupants_vs_pedestrians	cliff	endanger_occupants
114	female	self-driving	pedestrian	pedestrian	19	1 to 5 years	no higher education	neutral	corrected vision	50	car_occupants_vs_pedestrians	parked_van	endanger_occupants
005	female	self-driving	pedestrian	pedestrian	21	1 to 5 years	no higher education	neutral	no impairment	15	car_occupants_vs_pedestrians	cliff	endanger_occupants
005	female	self-driving	pedestrian	pedestrian	21	1 to 5 years	no higher education	neutral	no impairment	32	car_occupants_vs_pedestrians	parked_van	endanger_occupants
002	male	self-driving	passenger	passenger	27	5 to 10 years	undergraduate studies	positive	no impairment	100	car_occupants_vs_pedestrians	parked_van	endanger_occupants
002	male	self-driving	passenger	passenger	27	5 to 10 years	undergraduate studies	positive	no impairment	24	car_occupants_vs_pedestrians	cliff	endanger_pedestrians
164	male	human	pedestrian	pedestrian	26	5 to 10 years	no higher education	very positive	no impairment	100	car_occupants_vs_pedestrians	parked_van	endanger_occupants
164	male	human	pedestrian	pedestrian	26	5 to 10 years	no higher education	very positive	no impairment	100	car_occupants_vs_pedestrians	cliff	endanger_pedestrians
065	male	human	pedestrian	observer	23	none	no higher education	very positive	no impairment	63	car_occupants_vs_pedestrians	parked_van	endanger_pedestrians
065	male	human	pedestrian	observer	23	none	no higher education	very positive	no impairment	68	car_occupants_vs_pedestrians	cliff	endanger_pedestrians
112	male	self-driving	passenger	pedestrian	20	1 to 5 years	no higher education	very positive	no impairment	39	car_occupants_vs_pedestrians	cliff	endanger_pedestrians
112	male	self-driving	passenger	pedestrian	20	1 to 5 years	no higher education	very positive	no impairment	100	car_occupants_vs_pedestrians	parked_van	endanger_occupants
180	female	human	pedestrian	observer	18	1 to 5 years	no higher education	negative	corrected vision	49	car_occupants_vs_pedestrians	parked_van	endanger_occupants
180	female	human	pedestrian	observer	18	1 to 5 years	no higher education	negative	corrected vision	3	car_occupants_vs_pedestrians	cliff	endanger_occupants
166	female	human	pedestrian	passenger	19	1 to 5 years	no higher education	neutral	corrected vision	50	car_occupants_vs_pedestrians	parked_van	endanger_occupants
166	female	human	pedestrian	passenger	19	1 to 5 years	no higher education	neutral	corrected vision	30	car_occupants_vs_pedestrians	cliff	endanger_occupants
099	female	self-driving	pedestrian	pedestrian	20	1 to 5 years	no higher education	positive	no impairment	67	car_occupants_vs_pedestrians	parked_van	endanger_occupants
099	female	self-driving	pedestrian	pedestrian	20	1 to 5 years	no higher education	positive	no impairment	94	car_occupants_vs_pedestrians	cliff	endanger_occupants
113	male	self-driving	pedestrian	pedestrian	24	5 to 10 years	no higher education	very positive	no impairment	100	car_occupants_vs_pedestrians	parked_van	endanger_occupants
113	male	self-driving	pedestrian	pedestrian	24	5 to 10 years	no higher education	very positive	no impairment	0	car_occupants_vs_pedestrians	cliff	endanger_pedestrians
049	female	self-driving	pedestrian	pedestrian	20	1 to 5 years	no higher education	positive	no impairment	100	car_occupants_vs_pedestrians	cliff	endanger_pedestrians
049	female	self-driving	pedestrian	pedestrian	20	1 to 5 years	no higher education	positive	no impairment	100	car_occupants_vs_pedestrians	parked_van	endanger_occupants
083	male	self-driving	pedestrian	pedestrian	22	none	no higher education	very positive	no impairment	38	car_occupants_vs_pedestrians	cliff	endanger_occupants
083	male	self-driving	pedestrian	pedestrian	22	none	no higher education	very positive	no impairment	32	car_occupants_vs_pedestrians	parked_van	endanger_pedestrians
121	male	human	passenger	passenger	19	1 to 5 years	no higher education	positive	no impairment	39	car_occupants_vs_pedestrians	cliff	endanger_pedestrians
121	male	human	passenger	passenger	19	1 to 5 years	no higher education	positive	no impairment	96	car_occupants_vs_pedestrians	parked_van	endanger_occupants
147	female	human	pedestrian	pedestrian	18	1 to 5 years	no higher education	negative	corrected vision	20	car_occupants_vs_pedestrians	parked_van	endanger_occupants
147	female	human	pedestrian	pedestrian	18	1 to 5 years	no higher education	negative	corrected vision	89	car_occupants_vs_pedestrians	cliff	endanger_pedestrians
111	female	self-driving	pedestrian	pedestrian	23	5 to 10 years	no higher education	neutral	uncorrected vision	0	car_occupants_vs_pedestrians	parked_van	endanger_pedestrians
111	female	self-driving	pedestrian	pedestrian	23	5 to 10 years	no higher education	neutral	uncorrected vision	25	car_occupants_vs_pedestrians	cliff	endanger_pedestrians
008	female	human	pedestrian	pedestrian	24	5 to 10 years	undergraduate studies	neutral	no impairment	100	car_occupants_vs_pedestrians	parked_van	endanger_occupants
008	female	human	pedestrian	pedestrian	24	5 to 10 years	undergraduate studies	neutral	no impairment	0	car_occupants_vs_pedestrians	cliff	endanger_occupants
015	male	human	passenger	observer	26	5 to 10 years	no higher education	very positive	no impairment	16	car_occupants_vs_pedestrians	cliff	endanger_occupants
015	male	human	passenger	observer	26	5 to 10 years	no higher education	very positive	no impairment	71	car_occupants_vs_pedestrians	parked_van	endanger_occupants
079	female	self-driving	observer	observer	25	5 to 10 years	no higher education	positive	corrected vision	100	car_occupants_vs_pedestrians	cliff	endanger_occupants
079	female	self-driving	observer	observer	25	5 to 10 years	no higher education	positive	corrected vision	100	car_occupants_vs_pedestrians	parked_van	endanger_occupants
041	male	self-driving	pedestrian	pedestrian	22	1 to 5 years	no higher education	very positive	no impairment	28	car_occupants_vs_pedestrians	parked_van	endanger_pedestrians
041	male	self-driving	pedestrian	pedestrian	22	1 to 5 years	no higher education	very positive	no impairment	94	car_occupants_vs_pedestrians	cliff	endanger_pedestrians
057	male	human	observer	observer	21	1 to 5 years	no higher education	very positive	no impairment	78	car_occupants_vs_pedestrians	parked_van	endanger_occupants
057	male	human	observer	observer	21	1 to 5 years	no higher education	very positive	no impairment	67	car_occupants_vs_pedestrians	cliff	endanger_occupants
171	male	human	pedestrian	pedestrian	19	1 to 5 years	no higher education	positive	no impairment	87	car_occupants_vs_pedestrians	parked_van	endanger_occupants
171	male	human	pedestrian	pedestrian	19	1 to 5 years	no higher education	positive	no impairment	100	car_occupants_vs_pedestrians	cliff	endanger_occupants
